# Supplementary material for: iEzy-Drug: A Web Server for Identifying the Interaction between Enzymes and Drugs in Cellular Networking
Source: PubMed Central journal article supplement (PMC3858977; doi:10.1155/2013/701317), 2013-11-26
Supplement: 701317.f1.pdf [file 701317.f1.pdf]

**Online Supporting Information S1.** The benchmark dataset contains 8,157 enzyme-drug pair samples, of which 2,719 are interactive and 5,438 non-interactive. All the detailed information for the codes listed here can be found in KEGG database at <http://www.kegg.jp/kegg/>.

| <b>Pair attribute</b> | <b>Enzyme code in KEGG</b> | <b>Drug code in KEGG</b> |
|-----------------------|----------------------------|--------------------------|
| Interactive           | hsa:10056                  | D00021                   |
| Interactive           | hsa:100                    | D00037                   |
| Interactive           | hsa:100                    | D00155                   |
| Interactive           | hsa:10188                  | D01441                   |
| Interactive           | hsa:10269                  | D00279                   |
| Interactive           | hsa:10279                  | D00043                   |
| Interactive           | hsa:10279                  | D00160                   |
| Interactive           | hsa:10295                  | D00039                   |
| Interactive           | hsa:10295                  | D00065                   |
| Interactive           | hsa:10327                  | D00136                   |
| Interactive           | hsa:10327                  | D02323                   |
| Interactive           | hsa:1033                   | D00107                   |
| Interactive           | hsa:1033                   | D00184                   |
| Interactive           | hsa:10461                  | D01441                   |
| Interactive           | hsa:10461                  | D01977                   |
| Interactive           | hsa:10461                  | D03218                   |
| Interactive           | hsa:10461                  | D03350                   |
| Interactive           | hsa:10461                  | D04024                   |
| Interactive           | hsa:10461                  | D04025                   |
| Interactive           | hsa:10549                  | D00217                   |
| Interactive           | hsa:10549                  | D00577                   |
| Interactive           | hsa:10549                  | D03670                   |
| Interactive           | hsa:1056                   | D01223                   |
| Interactive           | hsa:1056                   | D04028                   |
| Interactive           | hsa:10667                  | D00021                   |
| Interactive           | hsa:10720                  | D01276                   |
| Interactive           | hsa:10747                  | D00043                   |
| Interactive           | hsa:10747                  | D00160                   |
| Interactive           | hsa:107                    | D00002                   |
| Interactive           | hsa:107                    | D00045                   |
| Interactive           | hsa:107                    | D02769                   |
| Interactive           | hsa:10825                  | D00900                   |
| Interactive           | hsa:10825                  | D00902                   |
| Interactive           | hsa:10825                  | D03829                   |
| Interactive           | hsa:10846                  | D00227                   |

|             |           |        |
|-------------|-----------|--------|
| Interactive | hsa:10846 | D00231 |
| Interactive | hsa:10846 | D00371 |
| Interactive | hsa:10846 | D00417 |
| Interactive | hsa:10846 | D00501 |
| Interactive | hsa:10846 | D00528 |
| Interactive | hsa:10846 | D00691 |
| Interactive | hsa:10846 | D01133 |
| Interactive | hsa:10846 | D01198 |
| Interactive | hsa:10846 | D01690 |
| Interactive | hsa:10846 | D01704 |
| Interactive | hsa:10846 | D01712 |
| Interactive | hsa:10846 | D02008 |
| Interactive | hsa:10846 | D02017 |
| Interactive | hsa:10846 | D02042 |
| Interactive | hsa:10846 | D02229 |
| Interactive | hsa:10846 | D02655 |
| Interactive | hsa:10846 | D02731 |
| Interactive | hsa:10858 | D00139 |
| Interactive | hsa:10858 | D00225 |
| Interactive | hsa:10858 | D00380 |
| Interactive | hsa:10858 | D00394 |
| Interactive | hsa:10858 | D00410 |
| Interactive | hsa:10858 | D00437 |
| Interactive | hsa:10858 | D00528 |
| Interactive | hsa:10858 | D00542 |
| Interactive | hsa:10858 | D00574 |
| Interactive | hsa:10858 | D01071 |
| Interactive | hsa:10858 | D03670 |
| Interactive | hsa:108   | D00002 |
| Interactive | hsa:10901 | D02335 |
| Interactive | hsa:10924 | D00417 |
| Interactive | hsa:10924 | D00501 |
| Interactive | hsa:10924 | D00528 |
| Interactive | hsa:10935 | D00217 |
| Interactive | hsa:10935 | D00577 |
| Interactive | hsa:10935 | D03670 |
| Interactive | hsa:10941 | D01276 |
| Interactive | hsa:109   | D00002 |
| Interactive | hsa:10    | D00002 |
| Interactive | hsa:10    | D00448 |
| Interactive | hsa:11072 | D00107 |
| Interactive | hsa:11072 | D00184 |

|             |            |        |
|-------------|------------|--------|
| Interactive | hsa:111    | D00002 |
| Interactive | hsa:11202  | D00043 |
| Interactive | hsa:11202  | D00160 |
| Interactive | hsa:11221  | D00107 |
| Interactive | hsa:11221  | D00184 |
| Interactive | hsa:11238  | D00218 |
| Interactive | hsa:11238  | D00340 |
| Interactive | hsa:11238  | D00518 |
| Interactive | hsa:11238  | D00519 |
| Interactive | hsa:11238  | D00538 |
| Interactive | hsa:11238  | D00652 |
| Interactive | hsa:11238  | D00653 |
| Interactive | hsa:11238  | D00655 |
| Interactive | hsa:11238  | D01196 |
| Interactive | hsa:11266  | D00107 |
| Interactive | hsa:11266  | D00184 |
| Interactive | hsa:112    | D00002 |
| Interactive | hsa:11330  | D00160 |
| Interactive | hsa:11330  | D01346 |
| Interactive | hsa:11343  | D01223 |
| Interactive | hsa:113    | D00002 |
| Interactive | hsa:1147   | D00448 |
| Interactive | hsa:114    | D00002 |
| Interactive | hsa:115    | D00002 |
| Interactive | hsa:116447 | D01061 |
| Interactive | hsa:116447 | D01432 |
| Interactive | hsa:116447 | D01911 |
| Interactive | hsa:116447 | D02168 |
| Interactive | hsa:116447 | D02756 |
| Interactive | hsa:116447 | D04031 |
| Interactive | hsa:1178   | D01223 |
| Interactive | hsa:1200   | D00043 |
| Interactive | hsa:1215   | D00043 |
| Interactive | hsa:1215   | D00160 |
| Interactive | hsa:124    | D00002 |
| Interactive | hsa:125    | D00002 |
| Interactive | hsa:1267   | D00417 |
| Interactive | hsa:1267   | D00501 |
| Interactive | hsa:1267   | D00528 |
| Interactive | hsa:126    | D00002 |
| Interactive | hsa:128853 | D00107 |
| Interactive | hsa:128853 | D00184 |

|             |            |        |
|-------------|------------|--------|
| Interactive | hsa:128    | D00002 |
| Interactive | hsa:129807 | D00900 |
| Interactive | hsa:129807 | D00902 |
| Interactive | hsa:129807 | D03829 |
| Interactive | hsa:130399 | D01441 |
| Interactive | hsa:1312   | D00781 |
| Interactive | hsa:1312   | D00786 |
| Interactive | hsa:131    | D00002 |
| Interactive | hsa:132160 | D00107 |
| Interactive | hsa:132160 | D00184 |
| Interactive | hsa:132    | D00423 |
| Interactive | hsa:132    | D02769 |
| Interactive | hsa:133121 | D00417 |
| Interactive | hsa:133121 | D00501 |
| Interactive | hsa:133121 | D00528 |
| Interactive | hsa:134510 | D00107 |
| Interactive | hsa:134510 | D00184 |
| Interactive | hsa:1360   | D00037 |
| Interactive | hsa:1363   | D00052 |
| Interactive | hsa:1374   | D02176 |
| Interactive | hsa:1376   | D02176 |
| Interactive | hsa:1384   | D02176 |
| Interactive | hsa:13     | D01223 |
| Interactive | hsa:13     | D02356 |
| Interactive | hsa:142679 | D00107 |
| Interactive | hsa:142679 | D00184 |
| Interactive | hsa:1429   | D03798 |
| Interactive | hsa:1431   | D00037 |
| Interactive | hsa:1432   | D01840 |
| Interactive | hsa:1432   | D03115 |
| Interactive | hsa:1432   | D03736 |
| Interactive | hsa:1436   | D01441 |
| Interactive | hsa:1436   | D01977 |
| Interactive | hsa:1436   | D03218 |
| Interactive | hsa:1436   | D03350 |
| Interactive | hsa:1436   | D04024 |
| Interactive | hsa:1436   | D04025 |
| Interactive | hsa:1445   | D01441 |
| Interactive | hsa:150290 | D00107 |
| Interactive | hsa:150290 | D00184 |
| Interactive | hsa:1504   | D00160 |
| Interactive | hsa:1504   | D01346 |

|             |            |        |
|-------------|------------|--------|
| Interactive | hsa:151531 | D00584 |
| Interactive | hsa:1537   | D03670 |
| Interactive | hsa:1543   | D00217 |
| Interactive | hsa:1543   | D00225 |
| Interactive | hsa:1543   | D00380 |
| Interactive | hsa:1543   | D00394 |
| Interactive | hsa:1543   | D00437 |
| Interactive | hsa:1543   | D00528 |
| Interactive | hsa:1543   | D00542 |
| Interactive | hsa:1543   | D00569 |
| Interactive | hsa:1543   | D00574 |
| Interactive | hsa:1543   | D00771 |
| Interactive | hsa:1543   | D00960 |
| Interactive | hsa:1543   | D00964 |
| Interactive | hsa:1543   | D01071 |
| Interactive | hsa:1543   | D01425 |
| Interactive | hsa:1543   | D02451 |
| Interactive | hsa:1543   | D03670 |
| Interactive | hsa:1543   | D03778 |
| Interactive | hsa:1543   | D03781 |
| Interactive | hsa:1543   | D03784 |
| Interactive | hsa:1544   | D00139 |
| Interactive | hsa:1544   | D00217 |
| Interactive | hsa:1544   | D00225 |
| Interactive | hsa:1544   | D00283 |
| Interactive | hsa:1544   | D00380 |
| Interactive | hsa:1544   | D00394 |
| Interactive | hsa:1544   | D00410 |
| Interactive | hsa:1544   | D00437 |
| Interactive | hsa:1544   | D00454 |
| Interactive | hsa:1544   | D00528 |
| Interactive | hsa:1544   | D00542 |
| Interactive | hsa:1544   | D00563 |
| Interactive | hsa:1544   | D00569 |
| Interactive | hsa:1544   | D00574 |
| Interactive | hsa:1544   | D00771 |
| Interactive | hsa:1544   | D00960 |
| Interactive | hsa:1544   | D00964 |
| Interactive | hsa:1544   | D01071 |
| Interactive | hsa:1544   | D01425 |
| Interactive | hsa:1544   | D02451 |
| Interactive | hsa:1544   | D03670 |

|             |          |        |
|-------------|----------|--------|
| Interactive | hsa:1544 | D03778 |
| Interactive | hsa:1544 | D03781 |
| Interactive | hsa:1544 | D03784 |
| Interactive | hsa:1545 | D00139 |
| Interactive | hsa:1545 | D00225 |
| Interactive | hsa:1545 | D00380 |
| Interactive | hsa:1545 | D00394 |
| Interactive | hsa:1545 | D00410 |
| Interactive | hsa:1545 | D00437 |
| Interactive | hsa:1545 | D00528 |
| Interactive | hsa:1545 | D00542 |
| Interactive | hsa:1545 | D00574 |
| Interactive | hsa:1545 | D00960 |
| Interactive | hsa:1545 | D00964 |
| Interactive | hsa:1545 | D01071 |
| Interactive | hsa:1545 | D01425 |
| Interactive | hsa:1545 | D02451 |
| Interactive | hsa:1545 | D03670 |
| Interactive | hsa:1545 | D03778 |
| Interactive | hsa:1545 | D03781 |
| Interactive | hsa:1545 | D03784 |
| Interactive | hsa:1548 | D00139 |
| Interactive | hsa:1548 | D00225 |
| Interactive | hsa:1548 | D00380 |
| Interactive | hsa:1548 | D00394 |
| Interactive | hsa:1548 | D00410 |
| Interactive | hsa:1548 | D00437 |
| Interactive | hsa:1548 | D00528 |
| Interactive | hsa:1548 | D00542 |
| Interactive | hsa:1548 | D00574 |
| Interactive | hsa:1548 | D00960 |
| Interactive | hsa:1548 | D00964 |
| Interactive | hsa:1548 | D01071 |
| Interactive | hsa:1548 | D01425 |
| Interactive | hsa:1548 | D02451 |
| Interactive | hsa:1548 | D03670 |
| Interactive | hsa:1548 | D03778 |
| Interactive | hsa:1548 | D03781 |
| Interactive | hsa:1548 | D03784 |
| Interactive | hsa:1549 | D00139 |
| Interactive | hsa:1549 | D00225 |
| Interactive | hsa:1549 | D00380 |

|             |          |        |
|-------------|----------|--------|
| Interactive | hsa:1549 | D00394 |
| Interactive | hsa:1549 | D00410 |
| Interactive | hsa:1549 | D00437 |
| Interactive | hsa:1549 | D00542 |
| Interactive | hsa:1549 | D00574 |
| Interactive | hsa:1549 | D00771 |
| Interactive | hsa:1549 | D00960 |
| Interactive | hsa:1549 | D00964 |
| Interactive | hsa:1549 | D01071 |
| Interactive | hsa:1549 | D01425 |
| Interactive | hsa:1549 | D02451 |
| Interactive | hsa:1549 | D03670 |
| Interactive | hsa:1549 | D03778 |
| Interactive | hsa:1549 | D03781 |
| Interactive | hsa:1549 | D03784 |
| Interactive | hsa:1551 | D00139 |
| Interactive | hsa:1551 | D00225 |
| Interactive | hsa:1551 | D00380 |
| Interactive | hsa:1551 | D00394 |
| Interactive | hsa:1551 | D00410 |
| Interactive | hsa:1551 | D00437 |
| Interactive | hsa:1551 | D00528 |
| Interactive | hsa:1551 | D00542 |
| Interactive | hsa:1551 | D00574 |
| Interactive | hsa:1551 | D00960 |
| Interactive | hsa:1551 | D00964 |
| Interactive | hsa:1551 | D01071 |
| Interactive | hsa:1551 | D01425 |
| Interactive | hsa:1551 | D02451 |
| Interactive | hsa:1551 | D03670 |
| Interactive | hsa:1551 | D03778 |
| Interactive | hsa:1551 | D03781 |
| Interactive | hsa:1551 | D03784 |
| Interactive | hsa:1553 | D00139 |
| Interactive | hsa:1553 | D00225 |
| Interactive | hsa:1553 | D00380 |
| Interactive | hsa:1553 | D00394 |
| Interactive | hsa:1553 | D00410 |
| Interactive | hsa:1553 | D00437 |
| Interactive | hsa:1553 | D00528 |
| Interactive | hsa:1553 | D00542 |
| Interactive | hsa:1553 | D00574 |

|             |          |        |
|-------------|----------|--------|
| Interactive | hsa:1553 | D00960 |
| Interactive | hsa:1553 | D00964 |
| Interactive | hsa:1553 | D01071 |
| Interactive | hsa:1553 | D01425 |
| Interactive | hsa:1553 | D02451 |
| Interactive | hsa:1553 | D03670 |
| Interactive | hsa:1553 | D03778 |
| Interactive | hsa:1553 | D03781 |
| Interactive | hsa:1553 | D03784 |
| Interactive | hsa:1555 | D00139 |
| Interactive | hsa:1555 | D00225 |
| Interactive | hsa:1555 | D00380 |
| Interactive | hsa:1555 | D00394 |
| Interactive | hsa:1555 | D00410 |
| Interactive | hsa:1555 | D00437 |
| Interactive | hsa:1555 | D00528 |
| Interactive | hsa:1555 | D00542 |
| Interactive | hsa:1555 | D00574 |
| Interactive | hsa:1555 | D00960 |
| Interactive | hsa:1555 | D00964 |
| Interactive | hsa:1555 | D01071 |
| Interactive | hsa:1555 | D01425 |
| Interactive | hsa:1555 | D02451 |
| Interactive | hsa:1555 | D03670 |
| Interactive | hsa:1555 | D03778 |
| Interactive | hsa:1555 | D03781 |
| Interactive | hsa:1555 | D03784 |
| Interactive | hsa:1557 | D00139 |
| Interactive | hsa:1557 | D00225 |
| Interactive | hsa:1557 | D00283 |
| Interactive | hsa:1557 | D00293 |
| Interactive | hsa:1557 | D00322 |
| Interactive | hsa:1557 | D00380 |
| Interactive | hsa:1557 | D00394 |
| Interactive | hsa:1557 | D00410 |
| Interactive | hsa:1557 | D00416 |
| Interactive | hsa:1557 | D00437 |
| Interactive | hsa:1557 | D00512 |
| Interactive | hsa:1557 | D00528 |
| Interactive | hsa:1557 | D00533 |
| Interactive | hsa:1557 | D00536 |
| Interactive | hsa:1557 | D00542 |



|             |          |        |
|-------------|----------|--------|
| Interactive | hsa:1557 | D00574 |
| Interactive | hsa:1557 | D00882 |
| Interactive | hsa:1557 | D00960 |
| Interactive | hsa:1557 | D00964 |
| Interactive | hsa:1557 | D01071 |
| Interactive | hsa:1557 | D01425 |
| Interactive | hsa:1557 | D02451 |
| Interactive | hsa:1557 | D03670 |
| Interactive | hsa:1557 | D03778 |
| Interactive | hsa:1557 | D03781 |
| Interactive | hsa:1557 | D03784 |
| Interactive | hsa:1558 | D00139 |
| Interactive | hsa:1558 | D00225 |
| Interactive | hsa:1558 | D00252 |
| Interactive | hsa:1558 | D00380 |
| Interactive | hsa:1558 | D00394 |
| Interactive | hsa:1558 | D00410 |
| Interactive | hsa:1558 | D00437 |
| Interactive | hsa:1558 | D00528 |
| Interactive | hsa:1558 | D00542 |
| Interactive | hsa:1558 | D00574 |
| Interactive | hsa:1558 | D00596 |
| Interactive | hsa:1558 | D00960 |
| Interactive | hsa:1558 | D00964 |
| Interactive | hsa:1558 | D01071 |
| Interactive | hsa:1558 | D01425 |
| Interactive | hsa:1558 | D02356 |
| Interactive | hsa:1558 | D02451 |
| Interactive | hsa:1558 | D03670 |
| Interactive | hsa:1558 | D03778 |
| Interactive | hsa:1558 | D03781 |
| Interactive | hsa:1558 | D03784 |
| Interactive | hsa:1558 | D05341 |
| Interactive | hsa:1559 | D00126 |
| Interactive | hsa:1559 | D00139 |
| Interactive | hsa:1559 | D00225 |
| Interactive | hsa:1559 | D00322 |
| Interactive | hsa:1559 | D00380 |
| Interactive | hsa:1559 | D00394 |
| Interactive | hsa:1559 | D00410 |
| Interactive | hsa:1559 | D00416 |
| Interactive | hsa:1559 | D00512 |

|             |          |        |
|-------------|----------|--------|
| Interactive | hsa:1559 | D00528 |
| Interactive | hsa:1559 | D00542 |
| Interactive | hsa:1559 | D00567 |
| Interactive | hsa:1559 | D00574 |
| Interactive | hsa:1559 | D00593 |
| Interactive | hsa:1559 | D00882 |
| Interactive | hsa:1559 | D00960 |
| Interactive | hsa:1559 | D00964 |
| Interactive | hsa:1559 | D01071 |
| Interactive | hsa:1559 | D01425 |
| Interactive | hsa:1559 | D02451 |
| Interactive | hsa:1559 | D03670 |
| Interactive | hsa:1559 | D03778 |
| Interactive | hsa:1559 | D03781 |
| Interactive | hsa:1559 | D03784 |
| Interactive | hsa:1562 | D00139 |
| Interactive | hsa:1562 | D00225 |
| Interactive | hsa:1562 | D00380 |
| Interactive | hsa:1562 | D00394 |
| Interactive | hsa:1562 | D00410 |
| Interactive | hsa:1562 | D00437 |
| Interactive | hsa:1562 | D00528 |
| Interactive | hsa:1562 | D00542 |
| Interactive | hsa:1562 | D00574 |
| Interactive | hsa:1562 | D00960 |
| Interactive | hsa:1562 | D00964 |
| Interactive | hsa:1562 | D01071 |
| Interactive | hsa:1562 | D01425 |
| Interactive | hsa:1562 | D02451 |
| Interactive | hsa:1562 | D03670 |
| Interactive | hsa:1562 | D03778 |
| Interactive | hsa:1562 | D03781 |
| Interactive | hsa:1562 | D03784 |
| Interactive | hsa:1565 | D00139 |
| Interactive | hsa:1565 | D00217 |
| Interactive | hsa:1565 | D00225 |
| Interactive | hsa:1565 | D00234 |
| Interactive | hsa:1565 | D00274 |
| Interactive | hsa:1565 | D00283 |
| Interactive | hsa:1565 | D00300 |
| Interactive | hsa:1565 | D00380 |
| Interactive | hsa:1565 | D00394 |

|             |          |        |
|-------------|----------|--------|
| Interactive | hsa:1565 | D00410 |
| Interactive | hsa:1565 | D00437 |
| Interactive | hsa:1565 | D00454 |
| Interactive | hsa:1565 | D00503 |
| Interactive | hsa:1565 | D00521 |
| Interactive | hsa:1565 | D00528 |
| Interactive | hsa:1565 | D00542 |
| Interactive | hsa:1565 | D00563 |
| Interactive | hsa:1565 | D00574 |
| Interactive | hsa:1565 | D00960 |
| Interactive | hsa:1565 | D00964 |
| Interactive | hsa:1565 | D01071 |
| Interactive | hsa:1565 | D01164 |
| Interactive | hsa:1565 | D01425 |
| Interactive | hsa:1565 | D02342 |
| Interactive | hsa:1565 | D02451 |
| Interactive | hsa:1565 | D02671 |
| Interactive | hsa:1565 | D03670 |
| Interactive | hsa:1565 | D03778 |
| Interactive | hsa:1565 | D03781 |
| Interactive | hsa:1565 | D03784 |
| Interactive | hsa:1571 | D00131 |
| Interactive | hsa:1571 | D00139 |
| Interactive | hsa:1571 | D00217 |
| Interactive | hsa:1571 | D00225 |
| Interactive | hsa:1571 | D00380 |
| Interactive | hsa:1571 | D00394 |
| Interactive | hsa:1571 | D00410 |
| Interactive | hsa:1571 | D00437 |
| Interactive | hsa:1571 | D00528 |
| Interactive | hsa:1571 | D00543 |
| Interactive | hsa:1571 | D00544 |
| Interactive | hsa:1571 | D00547 |
| Interactive | hsa:1571 | D00574 |
| Interactive | hsa:1571 | D00771 |
| Interactive | hsa:1571 | D00960 |
| Interactive | hsa:1571 | D00964 |
| Interactive | hsa:1571 | D01071 |
| Interactive | hsa:1571 | D01425 |
| Interactive | hsa:1571 | D02451 |
| Interactive | hsa:1571 | D03670 |
| Interactive | hsa:1571 | D03778 |

|             |          |        |
|-------------|----------|--------|
| Interactive | hsa:1571 | D03781 |
| Interactive | hsa:1571 | D03784 |
| Interactive | hsa:1572 | D00139 |
| Interactive | hsa:1572 | D00225 |
| Interactive | hsa:1572 | D00380 |
| Interactive | hsa:1572 | D00394 |
| Interactive | hsa:1572 | D00410 |
| Interactive | hsa:1572 | D00437 |
| Interactive | hsa:1572 | D00528 |
| Interactive | hsa:1572 | D00542 |
| Interactive | hsa:1572 | D00574 |
| Interactive | hsa:1572 | D00960 |
| Interactive | hsa:1572 | D00964 |
| Interactive | hsa:1572 | D01071 |
| Interactive | hsa:1572 | D01425 |
| Interactive | hsa:1572 | D02451 |
| Interactive | hsa:1572 | D03670 |
| Interactive | hsa:1572 | D03778 |
| Interactive | hsa:1572 | D03781 |
| Interactive | hsa:1572 | D03784 |
| Interactive | hsa:1573 | D00139 |
| Interactive | hsa:1573 | D00225 |
| Interactive | hsa:1573 | D00380 |
| Interactive | hsa:1573 | D00394 |
| Interactive | hsa:1573 | D00410 |
| Interactive | hsa:1573 | D00437 |
| Interactive | hsa:1573 | D00528 |
| Interactive | hsa:1573 | D00542 |
| Interactive | hsa:1573 | D00574 |
| Interactive | hsa:1573 | D00960 |
| Interactive | hsa:1573 | D00964 |
| Interactive | hsa:1573 | D01071 |
| Interactive | hsa:1573 | D01425 |
| Interactive | hsa:1573 | D02451 |
| Interactive | hsa:1573 | D03670 |
| Interactive | hsa:1573 | D03778 |
| Interactive | hsa:1573 | D03781 |
| Interactive | hsa:1573 | D03784 |
| Interactive | hsa:1576 | D00136 |
| Interactive | hsa:1576 | D00139 |
| Interactive | hsa:1576 | D00225 |
| Interactive | hsa:1576 | D00234 |

|             |          |        |
|-------------|----------|--------|
| Interactive | hsa:1576 | D00252 |
| Interactive | hsa:1576 | D00274 |
| Interactive | hsa:1576 | D00283 |
| Interactive | hsa:1576 | D00293 |
| Interactive | hsa:1576 | D00364 |
| Interactive | hsa:1576 | D00380 |
| Interactive | hsa:1576 | D00387 |
| Interactive | hsa:1576 | D00394 |
| Interactive | hsa:1576 | D00410 |
| Interactive | hsa:1576 | D00434 |
| Interactive | hsa:1576 | D00437 |
| Interactive | hsa:1576 | D00503 |
| Interactive | hsa:1576 | D00521 |
| Interactive | hsa:1576 | D00528 |
| Interactive | hsa:1576 | D00542 |
| Interactive | hsa:1576 | D00550 |
| Interactive | hsa:1576 | D00563 |
| Interactive | hsa:1576 | D00574 |
| Interactive | hsa:1576 | D00960 |
| Interactive | hsa:1576 | D00964 |
| Interactive | hsa:1576 | D01071 |
| Interactive | hsa:1576 | D01425 |
| Interactive | hsa:1576 | D01973 |
| Interactive | hsa:1576 | D02356 |
| Interactive | hsa:1576 | D02451 |
| Interactive | hsa:1576 | D03670 |
| Interactive | hsa:1576 | D03778 |
| Interactive | hsa:1576 | D03781 |
| Interactive | hsa:1576 | D03784 |
| Interactive | hsa:1577 | D00139 |
| Interactive | hsa:1577 | D00225 |
| Interactive | hsa:1577 | D00380 |
| Interactive | hsa:1577 | D00394 |
| Interactive | hsa:1577 | D00410 |
| Interactive | hsa:1577 | D00437 |
| Interactive | hsa:1577 | D00528 |
| Interactive | hsa:1577 | D00542 |
| Interactive | hsa:1577 | D00574 |
| Interactive | hsa:1577 | D00960 |
| Interactive | hsa:1577 | D00964 |
| Interactive | hsa:1577 | D01071 |
| Interactive | hsa:1577 | D01425 |

|             |          |        |
|-------------|----------|--------|
| Interactive | hsa:1577 | D02451 |
| Interactive | hsa:1577 | D03670 |
| Interactive | hsa:1577 | D03778 |
| Interactive | hsa:1577 | D03781 |
| Interactive | hsa:1577 | D03784 |
| Interactive | hsa:1579 | D00139 |
| Interactive | hsa:1579 | D00225 |
| Interactive | hsa:1579 | D00380 |
| Interactive | hsa:1579 | D00394 |
| Interactive | hsa:1579 | D00410 |
| Interactive | hsa:1579 | D00437 |
| Interactive | hsa:1579 | D00528 |
| Interactive | hsa:1579 | D00542 |
| Interactive | hsa:1579 | D00574 |
| Interactive | hsa:1579 | D01071 |
| Interactive | hsa:1580 | D00139 |
| Interactive | hsa:1580 | D00225 |
| Interactive | hsa:1580 | D00380 |
| Interactive | hsa:1580 | D00394 |
| Interactive | hsa:1580 | D00410 |
| Interactive | hsa:1580 | D00437 |
| Interactive | hsa:1580 | D00528 |
| Interactive | hsa:1580 | D00542 |
| Interactive | hsa:1580 | D00574 |
| Interactive | hsa:1580 | D00960 |
| Interactive | hsa:1580 | D00964 |
| Interactive | hsa:1580 | D01071 |
| Interactive | hsa:1580 | D01425 |
| Interactive | hsa:1580 | D02451 |
| Interactive | hsa:1580 | D03670 |
| Interactive | hsa:1580 | D03778 |
| Interactive | hsa:1580 | D03781 |
| Interactive | hsa:1580 | D03784 |
| Interactive | hsa:1581 | D00139 |
| Interactive | hsa:1581 | D00225 |
| Interactive | hsa:1581 | D00380 |
| Interactive | hsa:1581 | D00394 |
| Interactive | hsa:1581 | D00410 |
| Interactive | hsa:1581 | D00437 |
| Interactive | hsa:1581 | D00528 |
| Interactive | hsa:1581 | D00542 |
| Interactive | hsa:1581 | D00574 |

|             |          |        |
|-------------|----------|--------|
| Interactive | hsa:1581 | D01071 |
| Interactive | hsa:1581 | D03670 |
| Interactive | hsa:1582 | D00139 |
| Interactive | hsa:1582 | D00225 |
| Interactive | hsa:1582 | D00380 |
| Interactive | hsa:1582 | D00394 |
| Interactive | hsa:1582 | D00410 |
| Interactive | hsa:1582 | D00437 |
| Interactive | hsa:1582 | D00528 |
| Interactive | hsa:1582 | D00542 |
| Interactive | hsa:1582 | D00574 |
| Interactive | hsa:1582 | D01071 |
| Interactive | hsa:1582 | D03670 |
| Interactive | hsa:1583 | D00139 |
| Interactive | hsa:1583 | D00225 |
| Interactive | hsa:1583 | D00380 |
| Interactive | hsa:1583 | D00394 |
| Interactive | hsa:1583 | D00437 |
| Interactive | hsa:1583 | D00528 |
| Interactive | hsa:1583 | D00542 |
| Interactive | hsa:1583 | D00574 |
| Interactive | hsa:1583 | D01071 |
| Interactive | hsa:1583 | D03670 |
| Interactive | hsa:1584 | D00139 |
| Interactive | hsa:1584 | D00225 |
| Interactive | hsa:1584 | D00380 |
| Interactive | hsa:1584 | D00394 |
| Interactive | hsa:1584 | D00410 |
| Interactive | hsa:1584 | D00437 |
| Interactive | hsa:1584 | D00528 |
| Interactive | hsa:1584 | D00542 |
| Interactive | hsa:1584 | D00574 |
| Interactive | hsa:1584 | D01071 |
| Interactive | hsa:1584 | D03670 |
| Interactive | hsa:1585 | D00139 |
| Interactive | hsa:1585 | D00225 |
| Interactive | hsa:1585 | D00380 |
| Interactive | hsa:1585 | D00394 |
| Interactive | hsa:1585 | D00528 |
| Interactive | hsa:1585 | D00542 |
| Interactive | hsa:1585 | D00574 |
| Interactive | hsa:1585 | D01071 |

|             |          |        |
|-------------|----------|--------|
| Interactive | hsa:1585 | D03670 |
| Interactive | hsa:1586 | D00139 |
| Interactive | hsa:1586 | D00225 |
| Interactive | hsa:1586 | D00380 |
| Interactive | hsa:1586 | D00394 |
| Interactive | hsa:1586 | D00410 |
| Interactive | hsa:1586 | D00437 |
| Interactive | hsa:1586 | D00528 |
| Interactive | hsa:1586 | D00542 |
| Interactive | hsa:1586 | D00574 |
| Interactive | hsa:1586 | D01071 |
| Interactive | hsa:1586 | D03670 |
| Interactive | hsa:1586 | D03781 |
| Interactive | hsa:1586 | D03784 |
| Interactive | hsa:1588 | D00139 |
| Interactive | hsa:1588 | D00153 |
| Interactive | hsa:1588 | D00225 |
| Interactive | hsa:1588 | D00380 |
| Interactive | hsa:1588 | D00394 |
| Interactive | hsa:1588 | D00410 |
| Interactive | hsa:1588 | D00437 |
| Interactive | hsa:1588 | D00528 |
| Interactive | hsa:1588 | D00542 |
| Interactive | hsa:1588 | D00574 |
| Interactive | hsa:1588 | D00960 |
| Interactive | hsa:1588 | D00963 |
| Interactive | hsa:1588 | D00964 |
| Interactive | hsa:1588 | D01071 |
| Interactive | hsa:1588 | D01425 |
| Interactive | hsa:1588 | D02451 |
| Interactive | hsa:1588 | D03670 |
| Interactive | hsa:1588 | D03778 |
| Interactive | hsa:1588 | D03781 |
| Interactive | hsa:1588 | D03784 |
| Interactive | hsa:1589 | D00139 |
| Interactive | hsa:1589 | D00225 |
| Interactive | hsa:1589 | D00380 |
| Interactive | hsa:1589 | D00394 |
| Interactive | hsa:1589 | D00410 |
| Interactive | hsa:1589 | D00437 |
| Interactive | hsa:1589 | D00528 |
| Interactive | hsa:1589 | D00542 |



|             |          |        |
|-------------|----------|--------|
| Interactive | hsa:1589 | D01071 |
| Interactive | hsa:1589 | D03670 |
| Interactive | hsa:1593 | D00139 |
| Interactive | hsa:1593 | D00188 |
| Interactive | hsa:1593 | D00225 |
| Interactive | hsa:1593 | D00380 |
| Interactive | hsa:1593 | D00394 |
| Interactive | hsa:1593 | D00410 |
| Interactive | hsa:1593 | D00437 |
| Interactive | hsa:1593 | D00528 |
| Interactive | hsa:1593 | D00542 |
| Interactive | hsa:1593 | D00574 |
| Interactive | hsa:1593 | D01071 |
| Interactive | hsa:1593 | D03670 |
| Interactive | hsa:1594 | D00139 |
| Interactive | hsa:1594 | D00187 |
| Interactive | hsa:1594 | D00225 |
| Interactive | hsa:1594 | D00380 |
| Interactive | hsa:1594 | D00394 |
| Interactive | hsa:1594 | D00410 |
| Interactive | hsa:1594 | D00437 |
| Interactive | hsa:1594 | D00528 |
| Interactive | hsa:1594 | D00542 |
| Interactive | hsa:1594 | D00574 |
| Interactive | hsa:1594 | D01071 |
| Interactive | hsa:1594 | D03670 |
| Interactive | hsa:1595 | D00139 |
| Interactive | hsa:1595 | D00225 |
| Interactive | hsa:1595 | D00380 |
| Interactive | hsa:1595 | D00394 |
| Interactive | hsa:1595 | D00410 |
| Interactive | hsa:1595 | D00437 |
| Interactive | hsa:1595 | D00528 |
| Interactive | hsa:1595 | D00542 |
| Interactive | hsa:1595 | D00574 |
| Interactive | hsa:1595 | D01071 |
| Interactive | hsa:1595 | D02556 |
| Interactive | hsa:1595 | D03670 |
| Interactive | hsa:1610 | D00005 |
| Interactive | hsa:1610 | D00038 |
| Interactive | hsa:1621 | D00131 |
| Interactive | hsa:1621 | D03787 |

|             |          |        |
|-------------|----------|--------|
| Interactive | hsa:1633 | D02368 |
| Interactive | hsa:1636 | D00198 |
| Interactive | hsa:1636 | D00251 |
| Interactive | hsa:1636 | D00362 |
| Interactive | hsa:1636 | D00383 |
| Interactive | hsa:1636 | D00421 |
| Interactive | hsa:1636 | D00459 |
| Interactive | hsa:1636 | D00620 |
| Interactive | hsa:1636 | D00621 |
| Interactive | hsa:1636 | D00622 |
| Interactive | hsa:1636 | D00623 |
| Interactive | hsa:1636 | D00624 |
| Interactive | hsa:1636 | D01069 |
| Interactive | hsa:1636 | D01119 |
| Interactive | hsa:1636 | D01549 |
| Interactive | hsa:1636 | D01667 |
| Interactive | hsa:1636 | D01900 |
| Interactive | hsa:1636 | D03077 |
| Interactive | hsa:1636 | D03440 |
| Interactive | hsa:1636 | D03752 |
| Interactive | hsa:1636 | D03753 |
| Interactive | hsa:1636 | D03756 |
| Interactive | hsa:1636 | D03758 |
| Interactive | hsa:1636 | D03760 |
| Interactive | hsa:1636 | D03763 |
| Interactive | hsa:1636 | D03765 |
| Interactive | hsa:1636 | D03767 |
| Interactive | hsa:1636 | D03769 |
| Interactive | hsa:1636 | D03772 |
| Interactive | hsa:1636 | D03773 |
| Interactive | hsa:1636 | D03775 |
| Interactive | hsa:1636 | D03776 |
| Interactive | hsa:1645 | D00136 |
| Interactive | hsa:1675 | D00043 |
| Interactive | hsa:1675 | D00160 |
| Interactive | hsa:1719 | D00142 |
| Interactive | hsa:1719 | D00145 |
| Interactive | hsa:1719 | D00285 |
| Interactive | hsa:1719 | D00488 |
| Interactive | hsa:1719 | D02115 |
| Interactive | hsa:1719 | D02487 |
| Interactive | hsa:1719 | D06238 |

|             |            |        |
|-------------|------------|--------|
| Interactive | hsa:1723   | D00055 |
| Interactive | hsa:1725   | D00002 |
| Interactive | hsa:1728   | D00005 |
| Interactive | hsa:1728   | D00208 |
| Interactive | hsa:1728   | D03798 |
| Interactive | hsa:1800   | D02194 |
| Interactive | hsa:1803   | D00043 |
| Interactive | hsa:1806   | D00005 |
| Interactive | hsa:1806   | D00027 |
| Interactive | hsa:1806   | D00584 |
| Interactive | hsa:1843   | D00107 |
| Interactive | hsa:1843   | D00184 |
| Interactive | hsa:1844   | D00107 |
| Interactive | hsa:1844   | D00184 |
| Interactive | hsa:1845   | D00107 |
| Interactive | hsa:1845   | D00184 |
| Interactive | hsa:1846   | D00107 |
| Interactive | hsa:1846   | D00184 |
| Interactive | hsa:1847   | D00107 |
| Interactive | hsa:1847   | D00184 |
| Interactive | hsa:1848   | D00107 |
| Interactive | hsa:1848   | D00184 |
| Interactive | hsa:1849   | D00107 |
| Interactive | hsa:1849   | D00184 |
| Interactive | hsa:1850   | D00107 |
| Interactive | hsa:1850   | D00184 |
| Interactive | hsa:1852   | D00107 |
| Interactive | hsa:1852   | D00184 |
| Interactive | hsa:1890   | D01223 |
| Interactive | hsa:189    | D00369 |
| Interactive | hsa:18     | D00332 |
| Interactive | hsa:18     | D00535 |
| Interactive | hsa:191    | D00002 |
| Interactive | hsa:1956   | D01441 |
| Interactive | hsa:1956   | D01977 |
| Interactive | hsa:1956   | D03218 |
| Interactive | hsa:1956   | D03350 |
| Interactive | hsa:1956   | D04024 |
| Interactive | hsa:1956   | D04025 |
| Interactive | hsa:196883 | D00002 |
| Interactive | hsa:1969   | D01441 |
| Interactive | hsa:1969   | D01977 |

|             |            |        |
|-------------|------------|--------|
| Interactive | hsa:1969   | D03218 |
| Interactive | hsa:1969   | D03350 |
| Interactive | hsa:1969   | D04024 |
| Interactive | hsa:1969   | D04025 |
| Interactive | hsa:1990   | D00160 |
| Interactive | hsa:1991   | D00160 |
| Interactive | hsa:1991   | D01918 |
| Interactive | hsa:1991   | D03788 |
| Interactive | hsa:199974 | D00139 |
| Interactive | hsa:199974 | D00225 |
| Interactive | hsa:199974 | D00380 |
| Interactive | hsa:199974 | D00394 |
| Interactive | hsa:199974 | D00410 |
| Interactive | hsa:199974 | D00437 |
| Interactive | hsa:199974 | D00528 |
| Interactive | hsa:199974 | D00542 |
| Interactive | hsa:199974 | D00574 |
| Interactive | hsa:199974 | D00960 |
| Interactive | hsa:199974 | D00964 |
| Interactive | hsa:199974 | D01071 |
| Interactive | hsa:199974 | D01425 |
| Interactive | hsa:199974 | D02451 |
| Interactive | hsa:199974 | D03670 |
| Interactive | hsa:199974 | D03778 |
| Interactive | hsa:199974 | D03781 |
| Interactive | hsa:199974 | D03784 |
| Interactive | hsa:2041   | D01441 |
| Interactive | hsa:2041   | D01977 |
| Interactive | hsa:2041   | D03218 |
| Interactive | hsa:2041   | D03350 |
| Interactive | hsa:2041   | D04024 |
| Interactive | hsa:2041   | D04025 |
| Interactive | hsa:2042   | D01441 |
| Interactive | hsa:2042   | D01977 |
| Interactive | hsa:2042   | D03218 |
| Interactive | hsa:2042   | D03350 |
| Interactive | hsa:2042   | D04024 |
| Interactive | hsa:2042   | D04025 |
| Interactive | hsa:2043   | D01441 |
| Interactive | hsa:2043   | D01977 |
| Interactive | hsa:2043   | D03218 |
| Interactive | hsa:2043   | D03350 |

|             |          |        |
|-------------|----------|--------|
| Interactive | hsa:2043 | D04024 |
| Interactive | hsa:2043 | D04025 |
| Interactive | hsa:2044 | D01441 |
| Interactive | hsa:2044 | D01977 |
| Interactive | hsa:2044 | D03218 |
| Interactive | hsa:2044 | D03350 |
| Interactive | hsa:2044 | D04024 |
| Interactive | hsa:2044 | D04025 |
| Interactive | hsa:2045 | D01441 |
| Interactive | hsa:2045 | D01977 |
| Interactive | hsa:2045 | D03218 |
| Interactive | hsa:2045 | D03350 |
| Interactive | hsa:2045 | D04024 |
| Interactive | hsa:2045 | D04025 |
| Interactive | hsa:2046 | D01441 |
| Interactive | hsa:2046 | D01977 |
| Interactive | hsa:2046 | D03218 |
| Interactive | hsa:2046 | D03350 |
| Interactive | hsa:2046 | D04024 |
| Interactive | hsa:2046 | D04025 |
| Interactive | hsa:2047 | D01441 |
| Interactive | hsa:2047 | D01977 |
| Interactive | hsa:2047 | D03218 |
| Interactive | hsa:2047 | D03350 |
| Interactive | hsa:2047 | D04024 |
| Interactive | hsa:2047 | D04025 |
| Interactive | hsa:2048 | D01441 |
| Interactive | hsa:2048 | D01977 |
| Interactive | hsa:2048 | D03218 |
| Interactive | hsa:2048 | D03350 |
| Interactive | hsa:2048 | D04024 |
| Interactive | hsa:2048 | D04025 |
| Interactive | hsa:2049 | D01441 |
| Interactive | hsa:2049 | D01977 |
| Interactive | hsa:2049 | D03218 |
| Interactive | hsa:2049 | D03350 |
| Interactive | hsa:2049 | D04024 |
| Interactive | hsa:2049 | D04025 |
| Interactive | hsa:2050 | D01441 |
| Interactive | hsa:2050 | D01977 |
| Interactive | hsa:2050 | D03218 |
| Interactive | hsa:2050 | D03350 |

|             |          |        |
|-------------|----------|--------|
| Interactive | hsa:2050 | D04024 |
| Interactive | hsa:2050 | D04025 |
| Interactive | hsa:2051 | D01441 |
| Interactive | hsa:2051 | D01977 |
| Interactive | hsa:2051 | D03218 |
| Interactive | hsa:2051 | D03350 |
| Interactive | hsa:2051 | D04024 |
| Interactive | hsa:2051 | D04025 |
| Interactive | hsa:2058 | D00035 |
| Interactive | hsa:2064 | D01441 |
| Interactive | hsa:2064 | D01977 |
| Interactive | hsa:2064 | D03218 |
| Interactive | hsa:2064 | D03350 |
| Interactive | hsa:2064 | D04024 |
| Interactive | hsa:2064 | D04025 |
| Interactive | hsa:2065 | D01441 |
| Interactive | hsa:2065 | D01977 |
| Interactive | hsa:2065 | D03218 |
| Interactive | hsa:2065 | D03350 |
| Interactive | hsa:2065 | D04024 |
| Interactive | hsa:2065 | D04025 |
| Interactive | hsa:2066 | D01441 |
| Interactive | hsa:2066 | D01977 |
| Interactive | hsa:2066 | D03218 |
| Interactive | hsa:2066 | D03350 |
| Interactive | hsa:2066 | D04024 |
| Interactive | hsa:2066 | D04025 |
| Interactive | hsa:2098 | D00043 |
| Interactive | hsa:2098 | D01223 |
| Interactive | hsa:2135 | D01828 |
| Interactive | hsa:2147 | D00270 |
| Interactive | hsa:2147 | D00494 |
| Interactive | hsa:2147 | D00560 |
| Interactive | hsa:2147 | D00733 |
| Interactive | hsa:2147 | D01981 |
| Interactive | hsa:2147 | D02335 |
| Interactive | hsa:2147 | D03722 |
| Interactive | hsa:2147 | D03728 |
| Interactive | hsa:2155 | D00043 |
| Interactive | hsa:2155 | D00160 |
| Interactive | hsa:2155 | D02335 |
| Interactive | hsa:2158 | D00043 |

|             |            |        |
|-------------|------------|--------|
| Interactive | hsa:2158   | D00160 |
| Interactive | hsa:2158   | D02335 |
| Interactive | hsa:2159   | D00043 |
| Interactive | hsa:2159   | D00160 |
| Interactive | hsa:2159   | D01844 |
| Interactive | hsa:2159   | D02335 |
| Interactive | hsa:2159   | D04029 |
| Interactive | hsa:2160   | D00043 |
| Interactive | hsa:2160   | D00160 |
| Interactive | hsa:2161   | D00043 |
| Interactive | hsa:2161   | D00160 |
| Interactive | hsa:216    | D00002 |
| Interactive | hsa:216    | D00094 |
| Interactive | hsa:216    | D00131 |
| Interactive | hsa:217    | D00002 |
| Interactive | hsa:217    | D00131 |
| Interactive | hsa:2180   | D02769 |
| Interactive | hsa:2185   | D01441 |
| Interactive | hsa:218    | D00131 |
| Interactive | hsa:2193   | D00021 |
| Interactive | hsa:219    | D00131 |
| Interactive | hsa:2224   | D01968 |
| Interactive | hsa:2232   | D00005 |
| Interactive | hsa:2235   | D03670 |
| Interactive | hsa:223    | D00131 |
| Interactive | hsa:2241   | D01441 |
| Interactive | hsa:2242   | D01441 |
| Interactive | hsa:224    | D00131 |
| Interactive | hsa:225689 | D01840 |
| Interactive | hsa:225689 | D03115 |
| Interactive | hsa:225689 | D03736 |
| Interactive | hsa:2260   | D01441 |
| Interactive | hsa:2260   | D01977 |
| Interactive | hsa:2260   | D03218 |
| Interactive | hsa:2260   | D03350 |
| Interactive | hsa:2260   | D04024 |
| Interactive | hsa:2260   | D04025 |
| Interactive | hsa:2261   | D01441 |
| Interactive | hsa:2261   | D01977 |
| Interactive | hsa:2261   | D03218 |
| Interactive | hsa:2261   | D03350 |
| Interactive | hsa:2261   | D04024 |

|             |           |        |
|-------------|-----------|--------|
| Interactive | hsa:2261  | D04025 |
| Interactive | hsa:2263  | D01441 |
| Interactive | hsa:2263  | D01977 |
| Interactive | hsa:2263  | D03218 |
| Interactive | hsa:2263  | D03350 |
| Interactive | hsa:2263  | D04024 |
| Interactive | hsa:2263  | D04025 |
| Interactive | hsa:2264  | D01441 |
| Interactive | hsa:2264  | D01977 |
| Interactive | hsa:2264  | D03218 |
| Interactive | hsa:2264  | D03350 |
| Interactive | hsa:2264  | D04024 |
| Interactive | hsa:2264  | D04025 |
| Interactive | hsa:2280  | D00753 |
| Interactive | hsa:22843 | D00107 |
| Interactive | hsa:22843 | D00184 |
| Interactive | hsa:22954 | D00283 |
| Interactive | hsa:22954 | D00451 |
| Interactive | hsa:22954 | D00513 |
| Interactive | hsa:22954 | D00726 |
| Interactive | hsa:22978 | D00423 |
| Interactive | hsa:22978 | D00501 |
| Interactive | hsa:23035 | D00107 |
| Interactive | hsa:23035 | D00184 |
| Interactive | hsa:231   | D00037 |
| Interactive | hsa:231   | D00136 |
| Interactive | hsa:231   | D01688 |
| Interactive | hsa:231   | D01715 |
| Interactive | hsa:231   | D01842 |
| Interactive | hsa:231   | D02323 |
| Interactive | hsa:231   | D02328 |
| Interactive | hsa:231   | D02835 |
| Interactive | hsa:231   | D03803 |
| Interactive | hsa:231   | D03805 |
| Interactive | hsa:231   | D03806 |
| Interactive | hsa:231   | D03807 |
| Interactive | hsa:2321  | D01441 |
| Interactive | hsa:2321  | D01977 |
| Interactive | hsa:2321  | D03218 |
| Interactive | hsa:2321  | D03350 |
| Interactive | hsa:2321  | D04024 |
| Interactive | hsa:2321  | D04025 |



|             |           |        |
|-------------|-----------|--------|
| Interactive | hsa:2322  | D01441 |
| Interactive | hsa:2322  | D01977 |
| Interactive | hsa:2322  | D03218 |
| Interactive | hsa:2322  | D03350 |
| Interactive | hsa:2322  | D04024 |
| Interactive | hsa:2322  | D04025 |
| Interactive | hsa:23236 | D00417 |
| Interactive | hsa:23236 | D00501 |
| Interactive | hsa:23236 | D00528 |
| Interactive | hsa:23239 | D00107 |
| Interactive | hsa:23239 | D00184 |
| Interactive | hsa:2324  | D01441 |
| Interactive | hsa:2324  | D01977 |
| Interactive | hsa:2324  | D03218 |
| Interactive | hsa:2324  | D03350 |
| Interactive | hsa:2324  | D04024 |
| Interactive | hsa:2324  | D04025 |
| Interactive | hsa:2326  | D00005 |
| Interactive | hsa:2326  | D00401 |
| Interactive | hsa:2328  | D00120 |
| Interactive | hsa:2328  | D00401 |
| Interactive | hsa:2339  | D03720 |
| Interactive | hsa:2342  | D03720 |
| Interactive | hsa:23430 | D00043 |
| Interactive | hsa:23430 | D00160 |
| Interactive | hsa:23436 | D00043 |
| Interactive | hsa:23436 | D00160 |
| Interactive | hsa:23475 | D00049 |
| Interactive | hsa:2356  | D00070 |
| Interactive | hsa:23632 | D00218 |
| Interactive | hsa:23632 | D00340 |
| Interactive | hsa:23632 | D00518 |
| Interactive | hsa:23632 | D00519 |
| Interactive | hsa:23632 | D00538 |
| Interactive | hsa:23632 | D00652 |
| Interactive | hsa:23632 | D00653 |
| Interactive | hsa:23632 | D00655 |
| Interactive | hsa:23632 | D01196 |
| Interactive | hsa:238   | D01441 |
| Interactive | hsa:238   | D01977 |
| Interactive | hsa:238   | D03218 |
| Interactive | hsa:238   | D03350 |

|             |         |        |
|-------------|---------|--------|
| Interactive | hsa:238 | D04024 |
| Interactive | hsa:238 | D04025 |
| Interactive | hsa:239 | D00097 |
| Interactive | hsa:239 | D00118 |
| Interactive | hsa:239 | D00126 |
| Interactive | hsa:239 | D00132 |
| Interactive | hsa:239 | D00141 |
| Interactive | hsa:239 | D00448 |
| Interactive | hsa:239 | D00510 |
| Interactive | hsa:239 | D01332 |
| Interactive | hsa:240 | D00097 |
| Interactive | hsa:240 | D00118 |
| Interactive | hsa:240 | D00126 |
| Interactive | hsa:240 | D00132 |
| Interactive | hsa:240 | D00141 |
| Interactive | hsa:240 | D00377 |
| Interactive | hsa:240 | D00414 |
| Interactive | hsa:240 | D00448 |
| Interactive | hsa:240 | D00510 |
| Interactive | hsa:240 | D01332 |
| Interactive | hsa:240 | D03882 |
| Interactive | hsa:242 | D00097 |
| Interactive | hsa:242 | D00118 |
| Interactive | hsa:242 | D00126 |
| Interactive | hsa:242 | D00132 |
| Interactive | hsa:242 | D00141 |
| Interactive | hsa:242 | D00448 |
| Interactive | hsa:242 | D00510 |
| Interactive | hsa:242 | D01332 |
| Interactive | hsa:246 | D00097 |
| Interactive | hsa:246 | D00118 |
| Interactive | hsa:246 | D00132 |
| Interactive | hsa:246 | D00141 |
| Interactive | hsa:246 | D00448 |
| Interactive | hsa:246 | D00510 |
| Interactive | hsa:246 | D01332 |
| Interactive | hsa:246 | D01364 |
| Interactive | hsa:247 | D00097 |
| Interactive | hsa:247 | D00118 |
| Interactive | hsa:247 | D00132 |
| Interactive | hsa:247 | D00141 |
| Interactive | hsa:247 | D00448 |

|             |            |        |
|-------------|------------|--------|
| Interactive | hsa:247    | D00510 |
| Interactive | hsa:247    | D01332 |
| Interactive | hsa:2534   | D01441 |
| Interactive | hsa:2548   | D00216 |
| Interactive | hsa:2548   | D00625 |
| Interactive | hsa:2548   | D01665 |
| Interactive | hsa:2548   | D03433 |
| Interactive | hsa:25796  | D01223 |
| Interactive | hsa:25824  | D00038 |
| Interactive | hsa:25824  | D00217 |
| Interactive | hsa:25824  | D00577 |
| Interactive | hsa:25824  | D03670 |
| Interactive | hsa:2582   | D00002 |
| Interactive | hsa:2595   | D00216 |
| Interactive | hsa:2595   | D00625 |
| Interactive | hsa:2595   | D01665 |
| Interactive | hsa:2595   | D03433 |
| Interactive | hsa:2597   | D00002 |
| Interactive | hsa:25     | D01441 |
| Interactive | hsa:260293 | D00139 |
| Interactive | hsa:260293 | D00225 |
| Interactive | hsa:260293 | D00380 |
| Interactive | hsa:260293 | D00394 |
| Interactive | hsa:260293 | D00410 |
| Interactive | hsa:260293 | D00437 |
| Interactive | hsa:260293 | D00528 |
| Interactive | hsa:260293 | D00542 |
| Interactive | hsa:260293 | D00574 |
| Interactive | hsa:260293 | D00960 |
| Interactive | hsa:260293 | D00964 |
| Interactive | hsa:260293 | D01071 |
| Interactive | hsa:260293 | D01425 |
| Interactive | hsa:260293 | D02451 |
| Interactive | hsa:260293 | D03670 |
| Interactive | hsa:260293 | D03778 |
| Interactive | hsa:260293 | D03781 |
| Interactive | hsa:260293 | D03784 |
| Interactive | hsa:26279  | D01223 |
| Interactive | hsa:2638   | D02315 |
| Interactive | hsa:2639   | D00005 |
| Interactive | hsa:2673   | D00332 |
| Interactive | hsa:2677   | D00148 |

|             |            |        |
|-------------|------------|--------|
| Interactive | hsa:2677   | D02335 |
| Interactive | hsa:27032  | D00542 |
| Interactive | hsa:27032  | D00543 |
| Interactive | hsa:27032  | D00544 |
| Interactive | hsa:27032  | D00545 |
| Interactive | hsa:27032  | D00546 |
| Interactive | hsa:27032  | D00547 |
| Interactive | hsa:27034  | D00005 |
| Interactive | hsa:27034  | D00039 |
| Interactive | hsa:270    | D02769 |
| Interactive | hsa:27115  | D00227 |
| Interactive | hsa:27115  | D00231 |
| Interactive | hsa:27115  | D00371 |
| Interactive | hsa:27115  | D00417 |
| Interactive | hsa:27115  | D00501 |
| Interactive | hsa:27115  | D00528 |
| Interactive | hsa:27115  | D00691 |
| Interactive | hsa:27115  | D01133 |
| Interactive | hsa:27115  | D01198 |
| Interactive | hsa:27115  | D01332 |
| Interactive | hsa:27115  | D01690 |
| Interactive | hsa:27115  | D01704 |
| Interactive | hsa:27115  | D01712 |
| Interactive | hsa:27115  | D02008 |
| Interactive | hsa:27115  | D02017 |
| Interactive | hsa:27115  | D02042 |
| Interactive | hsa:27115  | D02229 |
| Interactive | hsa:27115  | D02655 |
| Interactive | hsa:27115  | D02731 |
| Interactive | hsa:2746   | D00002 |
| Interactive | hsa:2746   | D00007 |
| Interactive | hsa:2766   | D03798 |
| Interactive | hsa:279    | D00216 |
| Interactive | hsa:279    | D00625 |
| Interactive | hsa:279    | D01346 |
| Interactive | hsa:2806   | D00332 |
| Interactive | hsa:28227  | D00107 |
| Interactive | hsa:28227  | D00184 |
| Interactive | hsa:2822   | D00417 |
| Interactive | hsa:2822   | D00501 |
| Interactive | hsa:2822   | D00528 |
| Interactive | hsa:284541 | D00139 |

|             |            |        |
|-------------|------------|--------|
| Interactive | hsa:284541 | D00225 |
| Interactive | hsa:284541 | D00380 |
| Interactive | hsa:284541 | D00394 |
| Interactive | hsa:284541 | D00410 |
| Interactive | hsa:284541 | D00437 |
| Interactive | hsa:284541 | D00528 |
| Interactive | hsa:284541 | D00542 |
| Interactive | hsa:284541 | D00574 |
| Interactive | hsa:284541 | D01071 |
| Interactive | hsa:284541 | D03670 |
| Interactive | hsa:285220 | D01441 |
| Interactive | hsa:285220 | D01977 |
| Interactive | hsa:285220 | D03218 |
| Interactive | hsa:285220 | D03350 |
| Interactive | hsa:285220 | D04024 |
| Interactive | hsa:285220 | D04025 |
| Interactive | hsa:2880   | D00577 |
| Interactive | hsa:2882   | D00577 |
| Interactive | hsa:28972  | D00043 |
| Interactive | hsa:28972  | D00160 |
| Interactive | hsa:28     | D00203 |
| Interactive | hsa:28     | D00222 |
| Interactive | hsa:28     | D00317 |
| Interactive | hsa:28     | D00884 |
| Interactive | hsa:28     | D00885 |
| Interactive | hsa:2936   | D00002 |
| Interactive | hsa:2936   | D00005 |
| Interactive | hsa:2936   | D00014 |
| Interactive | hsa:2950   | D00014 |
| Interactive | hsa:29785  | D00139 |
| Interactive | hsa:29785  | D00225 |
| Interactive | hsa:29785  | D00380 |
| Interactive | hsa:29785  | D00394 |
| Interactive | hsa:29785  | D00410 |
| Interactive | hsa:29785  | D00437 |
| Interactive | hsa:29785  | D00528 |
| Interactive | hsa:29785  | D00542 |
| Interactive | hsa:29785  | D00574 |
| Interactive | hsa:29785  | D00960 |
| Interactive | hsa:29785  | D00964 |
| Interactive | hsa:29785  | D01071 |
| Interactive | hsa:29785  | D01425 |

|             |           |        |
|-------------|-----------|--------|
| Interactive | hsa:29785 | D02451 |
| Interactive | hsa:29785 | D03670 |
| Interactive | hsa:29785 | D03778 |
| Interactive | hsa:29785 | D03781 |
| Interactive | hsa:29785 | D03784 |
| Interactive | hsa:29920 | D00035 |
| Interactive | hsa:29941 | D01441 |
| Interactive | hsa:29968 | D00332 |
| Interactive | hsa:3001  | D00043 |
| Interactive | hsa:3001  | D00160 |
| Interactive | hsa:3002  | D00043 |
| Interactive | hsa:3002  | D00160 |
| Interactive | hsa:3028  | D00002 |
| Interactive | hsa:3033  | D00002 |
| Interactive | hsa:3034  | D00032 |
| Interactive | hsa:3035  | D00032 |
| Interactive | hsa:3055  | D01441 |
| Interactive | hsa:3067  | D00032 |
| Interactive | hsa:306   | D00417 |
| Interactive | hsa:306   | D00501 |
| Interactive | hsa:306   | D00528 |
| Interactive | hsa:30814 | D01223 |
| Interactive | hsa:30833 | D00501 |
| Interactive | hsa:30    | D00222 |
| Interactive | hsa:30    | D00317 |
| Interactive | hsa:30    | D00333 |
| Interactive | hsa:30    | D00342 |
| Interactive | hsa:30    | D00391 |
| Interactive | hsa:30    | D00398 |
| Interactive | hsa:30    | D05407 |
| Interactive | hsa:313   | D01223 |
| Interactive | hsa:3141  | D00029 |
| Interactive | hsa:3156  | D00359 |
| Interactive | hsa:3156  | D00434 |
| Interactive | hsa:3156  | D00887 |
| Interactive | hsa:3156  | D00889 |
| Interactive | hsa:3156  | D00892 |
| Interactive | hsa:3156  | D00893 |
| Interactive | hsa:3156  | D01862 |
| Interactive | hsa:3156  | D01915 |
| Interactive | hsa:3156  | D02258 |
| Interactive | hsa:3156  | D03601 |

|             |            |        |
|-------------|------------|--------|
| Interactive | hsa:3156   | D03643 |
| Interactive | hsa:3156   | D03816 |
| Interactive | hsa:31     | D00007 |
| Interactive | hsa:31     | D00027 |
| Interactive | hsa:31     | D00029 |
| Interactive | hsa:326625 | D01027 |
| Interactive | hsa:327    | D00043 |
| Interactive | hsa:3283   | D01180 |
| Interactive | hsa:3290   | D00410 |
| Interactive | hsa:3291   | D00410 |
| Interactive | hsa:3292   | D00002 |
| Interactive | hsa:3295   | D00002 |
| Interactive | hsa:32     | D00029 |
| Interactive | hsa:3376   | D00065 |
| Interactive | hsa:339221 | D00417 |
| Interactive | hsa:339221 | D00501 |
| Interactive | hsa:339221 | D00528 |
| Interactive | hsa:3416   | D00052 |
| Interactive | hsa:3480   | D01441 |
| Interactive | hsa:3480   | D01977 |
| Interactive | hsa:3480   | D03218 |
| Interactive | hsa:3480   | D03350 |
| Interactive | hsa:3480   | D04024 |
| Interactive | hsa:3480   | D04025 |
| Interactive | hsa:349565 | D00002 |
| Interactive | hsa:34     | D00005 |
| Interactive | hsa:353    | D02769 |
| Interactive | hsa:354    | D00043 |
| Interactive | hsa:354    | D00160 |
| Interactive | hsa:3551   | D00097 |
| Interactive | hsa:3551   | D00120 |
| Interactive | hsa:3551   | D00448 |
| Interactive | hsa:35     | D00005 |
| Interactive | hsa:3612   | D00501 |
| Interactive | hsa:3614   | D00423 |
| Interactive | hsa:3614   | D00752 |
| Interactive | hsa:3615   | D00002 |
| Interactive | hsa:3615   | D00752 |
| Interactive | hsa:3643   | D01441 |
| Interactive | hsa:3643   | D01977 |
| Interactive | hsa:3643   | D03218 |
| Interactive | hsa:3643   | D03350 |

|             |            |        |
|-------------|------------|--------|
| Interactive | hsa:3643   | D04024 |
| Interactive | hsa:3643   | D04025 |
| Interactive | hsa:3643   | D04966 |
| Interactive | hsa:3645   | D01441 |
| Interactive | hsa:3645   | D01977 |
| Interactive | hsa:3645   | D03218 |
| Interactive | hsa:3645   | D03350 |
| Interactive | hsa:3645   | D04024 |
| Interactive | hsa:3645   | D04025 |
| Interactive | hsa:3645   | D04966 |
| Interactive | hsa:36     | D00065 |
| Interactive | hsa:3702   | D01441 |
| Interactive | hsa:3712   | D00005 |
| Interactive | hsa:3716   | D01441 |
| Interactive | hsa:3717   | D01441 |
| Interactive | hsa:3718   | D01441 |
| Interactive | hsa:3735   | D02304 |
| Interactive | hsa:377677 | D00218 |
| Interactive | hsa:377677 | D00340 |
| Interactive | hsa:377677 | D00518 |
| Interactive | hsa:377677 | D00519 |
| Interactive | hsa:377677 | D00538 |
| Interactive | hsa:377677 | D00652 |
| Interactive | hsa:377677 | D00653 |
| Interactive | hsa:377677 | D00655 |
| Interactive | hsa:377677 | D01196 |
| Interactive | hsa:3791   | D01441 |
| Interactive | hsa:3791   | D01977 |
| Interactive | hsa:3791   | D03218 |
| Interactive | hsa:3791   | D03350 |
| Interactive | hsa:3791   | D04024 |
| Interactive | hsa:3791   | D04025 |
| Interactive | hsa:3815   | D01441 |
| Interactive | hsa:3815   | D01977 |
| Interactive | hsa:3815   | D03218 |
| Interactive | hsa:3815   | D03350 |
| Interactive | hsa:3815   | D04024 |
| Interactive | hsa:3815   | D04025 |
| Interactive | hsa:3816   | D00043 |
| Interactive | hsa:3816   | D00160 |
| Interactive | hsa:3817   | D00043 |
| Interactive | hsa:3817   | D00160 |



|             |            |        |
|-------------|------------|--------|
| Interactive | hsa:3818   | D00043 |
| Interactive | hsa:3818   | D00160 |
| Interactive | hsa:38     | D00065 |
| Interactive | hsa:38     | D00448 |
| Interactive | hsa:3906   | D00126 |
| Interactive | hsa:3906   | D00132 |
| Interactive | hsa:3906   | D00293 |
| Interactive | hsa:3906   | D00510 |
| Interactive | hsa:390956 | D00107 |
| Interactive | hsa:3932   | D01441 |
| Interactive | hsa:3939   | D00002 |
| Interactive | hsa:3945   | D00002 |
| Interactive | hsa:3988   | D04028 |
| Interactive | hsa:3990   | D01223 |
| Interactive | hsa:3990   | D04028 |
| Interactive | hsa:3991   | D01223 |
| Interactive | hsa:4017   | D00270 |
| Interactive | hsa:4023   | D00279 |
| Interactive | hsa:4023   | D01223 |
| Interactive | hsa:4025   | D00097 |
| Interactive | hsa:4025   | D00217 |
| Interactive | hsa:4025   | D00562 |
| Interactive | hsa:4025   | D00577 |
| Interactive | hsa:4025   | D03670 |
| Interactive | hsa:4048   | D00097 |
| Interactive | hsa:4048   | D00118 |
| Interactive | hsa:4048   | D00126 |
| Interactive | hsa:4048   | D00132 |
| Interactive | hsa:4048   | D00141 |
| Interactive | hsa:4048   | D00448 |
| Interactive | hsa:4048   | D00510 |
| Interactive | hsa:4048   | D01332 |
| Interactive | hsa:4051   | D00139 |
| Interactive | hsa:4051   | D00225 |
| Interactive | hsa:4051   | D00380 |
| Interactive | hsa:4051   | D00394 |
| Interactive | hsa:4051   | D00410 |
| Interactive | hsa:4051   | D00437 |
| Interactive | hsa:4051   | D00528 |
| Interactive | hsa:4051   | D00542 |
| Interactive | hsa:4051   | D00574 |
| Interactive | hsa:4051   | D01071 |

|             |          |        |
|-------------|----------|--------|
| Interactive | hsa:4051 | D03670 |
| Interactive | hsa:4058 | D01441 |
| Interactive | hsa:4058 | D01977 |
| Interactive | hsa:4058 | D03218 |
| Interactive | hsa:4058 | D03350 |
| Interactive | hsa:4058 | D04024 |
| Interactive | hsa:4058 | D04025 |
| Interactive | hsa:4067 | D01441 |
| Interactive | hsa:4128 | D00270 |
| Interactive | hsa:4128 | D00505 |
| Interactive | hsa:4128 | D00785 |
| Interactive | hsa:4128 | D00826 |
| Interactive | hsa:4128 | D00947 |
| Interactive | hsa:4128 | D01097 |
| Interactive | hsa:4128 | D01888 |
| Interactive | hsa:4128 | D02559 |
| Interactive | hsa:4128 | D02560 |
| Interactive | hsa:4128 | D02561 |
| Interactive | hsa:4128 | D02562 |
| Interactive | hsa:4128 | D02563 |
| Interactive | hsa:4128 | D02564 |
| Interactive | hsa:4128 | D02579 |
| Interactive | hsa:4128 | D02580 |
| Interactive | hsa:4128 | D02581 |
| Interactive | hsa:4128 | D03731 |
| Interactive | hsa:4128 | D03733 |
| Interactive | hsa:4129 | D00005 |
| Interactive | hsa:4129 | D00270 |
| Interactive | hsa:4129 | D00505 |
| Interactive | hsa:4129 | D00785 |
| Interactive | hsa:4129 | D00826 |
| Interactive | hsa:4129 | D01097 |
| Interactive | hsa:4129 | D01888 |
| Interactive | hsa:4129 | D02559 |
| Interactive | hsa:4129 | D02560 |
| Interactive | hsa:4129 | D02561 |
| Interactive | hsa:4129 | D02562 |
| Interactive | hsa:4129 | D02563 |
| Interactive | hsa:4129 | D02564 |
| Interactive | hsa:4129 | D02579 |
| Interactive | hsa:4129 | D02580 |
| Interactive | hsa:4129 | D02581 |

|             |          |        |
|-------------|----------|--------|
| Interactive | hsa:4129 | D03731 |
| Interactive | hsa:4129 | D03733 |
| Interactive | hsa:4129 | D05458 |
| Interactive | hsa:4143 | D04983 |
| Interactive | hsa:4145 | D01441 |
| Interactive | hsa:4190 | D00002 |
| Interactive | hsa:4191 | D00037 |
| Interactive | hsa:4200 | D00002 |
| Interactive | hsa:4200 | D02308 |
| Interactive | hsa:4233 | D01441 |
| Interactive | hsa:4233 | D01977 |
| Interactive | hsa:4233 | D03218 |
| Interactive | hsa:4233 | D03350 |
| Interactive | hsa:4233 | D04024 |
| Interactive | hsa:4233 | D04025 |
| Interactive | hsa:4282 | D00037 |
| Interactive | hsa:4311 | D00052 |
| Interactive | hsa:4329 | D00039 |
| Interactive | hsa:4353 | D00097 |
| Interactive | hsa:4353 | D00217 |
| Interactive | hsa:4353 | D00401 |
| Interactive | hsa:4353 | D00562 |
| Interactive | hsa:4353 | D00577 |
| Interactive | hsa:43   | D00043 |
| Interactive | hsa:43   | D00196 |
| Interactive | hsa:43   | D00487 |
| Interactive | hsa:43   | D00667 |
| Interactive | hsa:43   | D00670 |
| Interactive | hsa:43   | D00805 |
| Interactive | hsa:43   | D00994 |
| Interactive | hsa:43   | D00995 |
| Interactive | hsa:43   | D00998 |
| Interactive | hsa:43   | D01001 |
| Interactive | hsa:43   | D01223 |
| Interactive | hsa:43   | D01228 |
| Interactive | hsa:43   | D02068 |
| Interactive | hsa:43   | D02173 |
| Interactive | hsa:43   | D02193 |
| Interactive | hsa:43   | D02418 |
| Interactive | hsa:43   | D02558 |
| Interactive | hsa:43   | D02729 |
| Interactive | hsa:43   | D03751 |

|             |          |        |
|-------------|----------|--------|
| Interactive | hsa:43   | D03822 |
| Interactive | hsa:43   | D03823 |
| Interactive | hsa:43   | D03826 |
| Interactive | hsa:43   | D04292 |
| Interactive | hsa:444  | D00131 |
| Interactive | hsa:4482 | D04983 |
| Interactive | hsa:4486 | D01441 |
| Interactive | hsa:4486 | D01977 |
| Interactive | hsa:4486 | D03218 |
| Interactive | hsa:4486 | D03350 |
| Interactive | hsa:4486 | D04024 |
| Interactive | hsa:4486 | D04025 |
| Interactive | hsa:4548 | D01027 |
| Interactive | hsa:4548 | D04983 |
| Interactive | hsa:4552 | D01027 |
| Interactive | hsa:4552 | D04983 |
| Interactive | hsa:4593 | D00726 |
| Interactive | hsa:4593 | D01441 |
| Interactive | hsa:4593 | D01977 |
| Interactive | hsa:4593 | D03218 |
| Interactive | hsa:4593 | D03350 |
| Interactive | hsa:4593 | D04024 |
| Interactive | hsa:4593 | D04025 |
| Interactive | hsa:4594 | D01027 |
| Interactive | hsa:4758 | D00900 |
| Interactive | hsa:4758 | D00902 |
| Interactive | hsa:4758 | D03829 |
| Interactive | hsa:4759 | D00900 |
| Interactive | hsa:4759 | D00902 |
| Interactive | hsa:4759 | D03829 |
| Interactive | hsa:476  | D00298 |
| Interactive | hsa:476  | D00654 |
| Interactive | hsa:476  | D00656 |
| Interactive | hsa:476  | D00658 |
| Interactive | hsa:476  | D01240 |
| Interactive | hsa:4835 | D00005 |
| Interactive | hsa:4835 | D03798 |
| Interactive | hsa:4837 | D00049 |
| Interactive | hsa:4860 | D00054 |
| Interactive | hsa:4860 | D01370 |
| Interactive | hsa:4881 | D00515 |
| Interactive | hsa:4881 | D00516 |

|             |          |        |
|-------------|----------|--------|
| Interactive | hsa:4881 | D00630 |
| Interactive | hsa:4907 | D00501 |
| Interactive | hsa:4914 | D01441 |
| Interactive | hsa:4914 | D01977 |
| Interactive | hsa:4914 | D03218 |
| Interactive | hsa:4914 | D03350 |
| Interactive | hsa:4914 | D04024 |
| Interactive | hsa:4914 | D04025 |
| Interactive | hsa:4915 | D01441 |
| Interactive | hsa:4915 | D01977 |
| Interactive | hsa:4915 | D03218 |
| Interactive | hsa:4915 | D03350 |
| Interactive | hsa:4915 | D04024 |
| Interactive | hsa:4915 | D04025 |
| Interactive | hsa:4916 | D01441 |
| Interactive | hsa:4916 | D01977 |
| Interactive | hsa:4916 | D03218 |
| Interactive | hsa:4916 | D03350 |
| Interactive | hsa:4916 | D04024 |
| Interactive | hsa:4916 | D04025 |
| Interactive | hsa:4919 | D01441 |
| Interactive | hsa:4919 | D01977 |
| Interactive | hsa:4919 | D03218 |
| Interactive | hsa:4919 | D03350 |
| Interactive | hsa:4919 | D04024 |
| Interactive | hsa:4919 | D04025 |
| Interactive | hsa:4920 | D01441 |
| Interactive | hsa:4920 | D01977 |
| Interactive | hsa:4920 | D03218 |
| Interactive | hsa:4920 | D03350 |
| Interactive | hsa:4920 | D04024 |
| Interactive | hsa:4920 | D04025 |
| Interactive | hsa:4921 | D01441 |
| Interactive | hsa:4921 | D01977 |
| Interactive | hsa:4921 | D03218 |
| Interactive | hsa:4921 | D03350 |
| Interactive | hsa:4921 | D04024 |
| Interactive | hsa:4921 | D04025 |
| Interactive | hsa:4942 | D00332 |
| Interactive | hsa:4942 | D00475 |
| Interactive | hsa:4953 | D00829 |
| Interactive | hsa:495  | D00455 |

|             |           |        |
|-------------|-----------|--------|
| Interactive | hsa:495   | D01984 |
| Interactive | hsa:49    | D00043 |
| Interactive | hsa:49    | D00160 |
| Interactive | hsa:501   | D00131 |
| Interactive | hsa:5033  | D00018 |
| Interactive | hsa:5045  | D00043 |
| Interactive | hsa:5045  | D00160 |
| Interactive | hsa:50484 | D02566 |
| Interactive | hsa:50484 | D03670 |
| Interactive | hsa:50487 | D01223 |
| Interactive | hsa:5049  | D01223 |
| Interactive | hsa:5050  | D01223 |
| Interactive | hsa:5051  | D01223 |
| Interactive | hsa:5052  | D00217 |
| Interactive | hsa:5052  | D00577 |
| Interactive | hsa:5052  | D03670 |
| Interactive | hsa:5053  | D00021 |
| Interactive | hsa:5091  | D00029 |
| Interactive | hsa:50940 | D00227 |
| Interactive | hsa:50940 | D00231 |
| Interactive | hsa:50940 | D00371 |
| Interactive | hsa:50940 | D00417 |
| Interactive | hsa:50940 | D01133 |
| Interactive | hsa:50940 | D01198 |
| Interactive | hsa:50940 | D01690 |
| Interactive | hsa:50940 | D01704 |
| Interactive | hsa:50940 | D01712 |
| Interactive | hsa:50940 | D02008 |
| Interactive | hsa:50940 | D02017 |
| Interactive | hsa:50940 | D02042 |
| Interactive | hsa:50940 | D02229 |
| Interactive | hsa:50940 | D02655 |
| Interactive | hsa:50940 | D02731 |
| Interactive | hsa:5095  | D00029 |
| Interactive | hsa:5095  | D00039 |
| Interactive | hsa:5095  | D00041 |
| Interactive | hsa:5095  | D00065 |
| Interactive | hsa:5096  | D00029 |
| Interactive | hsa:5096  | D00039 |
| Interactive | hsa:5096  | D00041 |
| Interactive | hsa:5096  | D00065 |
| Interactive | hsa:50    | D00037 |

|             |           |        |
|-------------|-----------|--------|
| Interactive | hsa:51004 | D00139 |
| Interactive | hsa:51004 | D00225 |
| Interactive | hsa:51004 | D00380 |
| Interactive | hsa:51004 | D00394 |
| Interactive | hsa:51004 | D00410 |
| Interactive | hsa:51004 | D00437 |
| Interactive | hsa:51004 | D00528 |
| Interactive | hsa:51004 | D00542 |
| Interactive | hsa:51004 | D00574 |
| Interactive | hsa:51004 | D01071 |
| Interactive | hsa:51095 | D00417 |
| Interactive | hsa:51095 | D00501 |
| Interactive | hsa:51095 | D00528 |
| Interactive | hsa:51166 | D00332 |
| Interactive | hsa:51172 | D00417 |
| Interactive | hsa:51172 | D00501 |
| Interactive | hsa:51172 | D00528 |
| Interactive | hsa:51181 | D00136 |
| Interactive | hsa:51181 | D00219 |
| Interactive | hsa:51181 | D00410 |
| Interactive | hsa:51205 | D00103 |
| Interactive | hsa:51207 | D00107 |
| Interactive | hsa:51207 | D00184 |
| Interactive | hsa:5122  | D00043 |
| Interactive | hsa:5122  | D00160 |
| Interactive | hsa:51251 | D00501 |
| Interactive | hsa:5126  | D00043 |
| Interactive | hsa:5126  | D00160 |
| Interactive | hsa:51292 | D03798 |
| Interactive | hsa:51302 | D00139 |
| Interactive | hsa:51302 | D00225 |
| Interactive | hsa:51302 | D00380 |
| Interactive | hsa:51302 | D00394 |
| Interactive | hsa:51302 | D00410 |
| Interactive | hsa:51302 | D00437 |
| Interactive | hsa:51302 | D00528 |
| Interactive | hsa:51302 | D00542 |
| Interactive | hsa:51302 | D00574 |
| Interactive | hsa:51302 | D01071 |
| Interactive | hsa:51365 | D01223 |
| Interactive | hsa:5136  | D00227 |
| Interactive | hsa:5136  | D00231 |

|             |          |        |
|-------------|----------|--------|
| Interactive | hsa:5136 | D00371 |
| Interactive | hsa:5136 | D00417 |
| Interactive | hsa:5136 | D00501 |
| Interactive | hsa:5136 | D00528 |
| Interactive | hsa:5136 | D00691 |
| Interactive | hsa:5136 | D01133 |
| Interactive | hsa:5136 | D01198 |
| Interactive | hsa:5136 | D01690 |
| Interactive | hsa:5136 | D01704 |
| Interactive | hsa:5136 | D01712 |
| Interactive | hsa:5136 | D02008 |
| Interactive | hsa:5136 | D02017 |
| Interactive | hsa:5136 | D02042 |
| Interactive | hsa:5136 | D02229 |
| Interactive | hsa:5136 | D02655 |
| Interactive | hsa:5136 | D02731 |
| Interactive | hsa:5137 | D00227 |
| Interactive | hsa:5137 | D00231 |
| Interactive | hsa:5137 | D00371 |
| Interactive | hsa:5137 | D00417 |
| Interactive | hsa:5137 | D00501 |
| Interactive | hsa:5137 | D00528 |
| Interactive | hsa:5137 | D00691 |
| Interactive | hsa:5137 | D01133 |
| Interactive | hsa:5137 | D01198 |
| Interactive | hsa:5137 | D01690 |
| Interactive | hsa:5137 | D01704 |
| Interactive | hsa:5137 | D01712 |
| Interactive | hsa:5137 | D02008 |
| Interactive | hsa:5137 | D02017 |
| Interactive | hsa:5137 | D02042 |
| Interactive | hsa:5137 | D02229 |
| Interactive | hsa:5137 | D02655 |
| Interactive | hsa:5137 | D02731 |
| Interactive | hsa:5138 | D00227 |
| Interactive | hsa:5138 | D00231 |
| Interactive | hsa:5138 | D00371 |
| Interactive | hsa:5138 | D00417 |
| Interactive | hsa:5138 | D00501 |
| Interactive | hsa:5138 | D00528 |
| Interactive | hsa:5138 | D00691 |
| Interactive | hsa:5138 | D01133 |



|             |          |        |
|-------------|----------|--------|
| Interactive | hsa:5138 | D01198 |
| Interactive | hsa:5138 | D01690 |
| Interactive | hsa:5138 | D01704 |
| Interactive | hsa:5138 | D01712 |
| Interactive | hsa:5138 | D02008 |
| Interactive | hsa:5138 | D02017 |
| Interactive | hsa:5138 | D02042 |
| Interactive | hsa:5138 | D02229 |
| Interactive | hsa:5138 | D02655 |
| Interactive | hsa:5138 | D02731 |
| Interactive | hsa:513  | D00542 |
| Interactive | hsa:513  | D00543 |
| Interactive | hsa:513  | D00544 |
| Interactive | hsa:513  | D00545 |
| Interactive | hsa:513  | D00546 |
| Interactive | hsa:513  | D00547 |
| Interactive | hsa:5140 | D00227 |
| Interactive | hsa:5140 | D00231 |
| Interactive | hsa:5140 | D00371 |
| Interactive | hsa:5140 | D00417 |
| Interactive | hsa:5140 | D00501 |
| Interactive | hsa:5140 | D00528 |
| Interactive | hsa:5140 | D00691 |
| Interactive | hsa:5140 | D01133 |
| Interactive | hsa:5140 | D01198 |
| Interactive | hsa:5140 | D01690 |
| Interactive | hsa:5140 | D01704 |
| Interactive | hsa:5140 | D01712 |
| Interactive | hsa:5140 | D02008 |
| Interactive | hsa:5140 | D02017 |
| Interactive | hsa:5140 | D02042 |
| Interactive | hsa:5140 | D02229 |
| Interactive | hsa:5140 | D02655 |
| Interactive | hsa:5140 | D02731 |
| Interactive | hsa:5141 | D00227 |
| Interactive | hsa:5141 | D00231 |
| Interactive | hsa:5141 | D00371 |
| Interactive | hsa:5141 | D00417 |
| Interactive | hsa:5141 | D00501 |
| Interactive | hsa:5141 | D00528 |
| Interactive | hsa:5141 | D00691 |
| Interactive | hsa:5141 | D01133 |

|             |          |        |
|-------------|----------|--------|
| Interactive | hsa:5141 | D01198 |
| Interactive | hsa:5141 | D01690 |
| Interactive | hsa:5141 | D01704 |
| Interactive | hsa:5141 | D01712 |
| Interactive | hsa:5141 | D02008 |
| Interactive | hsa:5141 | D02017 |
| Interactive | hsa:5141 | D02042 |
| Interactive | hsa:5141 | D02229 |
| Interactive | hsa:5141 | D02655 |
| Interactive | hsa:5141 | D02731 |
| Interactive | hsa:5142 | D00227 |
| Interactive | hsa:5142 | D00231 |
| Interactive | hsa:5142 | D00371 |
| Interactive | hsa:5142 | D00417 |
| Interactive | hsa:5142 | D00501 |
| Interactive | hsa:5142 | D00528 |
| Interactive | hsa:5142 | D00691 |
| Interactive | hsa:5142 | D01133 |
| Interactive | hsa:5142 | D01198 |
| Interactive | hsa:5142 | D01690 |
| Interactive | hsa:5142 | D01704 |
| Interactive | hsa:5142 | D01712 |
| Interactive | hsa:5142 | D02008 |
| Interactive | hsa:5142 | D02017 |
| Interactive | hsa:5142 | D02042 |
| Interactive | hsa:5142 | D02229 |
| Interactive | hsa:5142 | D02655 |
| Interactive | hsa:5142 | D02731 |
| Interactive | hsa:5143 | D00227 |
| Interactive | hsa:5143 | D00231 |
| Interactive | hsa:5143 | D00371 |
| Interactive | hsa:5143 | D00417 |
| Interactive | hsa:5143 | D00501 |
| Interactive | hsa:5143 | D00528 |
| Interactive | hsa:5143 | D00691 |
| Interactive | hsa:5143 | D01133 |
| Interactive | hsa:5143 | D01198 |
| Interactive | hsa:5143 | D01690 |
| Interactive | hsa:5143 | D01704 |
| Interactive | hsa:5143 | D01712 |
| Interactive | hsa:5143 | D02008 |
| Interactive | hsa:5143 | D02017 |

|             |          |        |
|-------------|----------|--------|
| Interactive | hsa:5143 | D02042 |
| Interactive | hsa:5143 | D02229 |
| Interactive | hsa:5143 | D02655 |
| Interactive | hsa:5143 | D02731 |
| Interactive | hsa:5144 | D00227 |
| Interactive | hsa:5144 | D00231 |
| Interactive | hsa:5144 | D00371 |
| Interactive | hsa:5144 | D00417 |
| Interactive | hsa:5144 | D00501 |
| Interactive | hsa:5144 | D00528 |
| Interactive | hsa:5144 | D00691 |
| Interactive | hsa:5144 | D01133 |
| Interactive | hsa:5144 | D01198 |
| Interactive | hsa:5144 | D01690 |
| Interactive | hsa:5144 | D01704 |
| Interactive | hsa:5144 | D01712 |
| Interactive | hsa:5144 | D02008 |
| Interactive | hsa:5144 | D02017 |
| Interactive | hsa:5144 | D02042 |
| Interactive | hsa:5144 | D02229 |
| Interactive | hsa:5144 | D02655 |
| Interactive | hsa:5144 | D02731 |
| Interactive | hsa:5145 | D00417 |
| Interactive | hsa:5145 | D00501 |
| Interactive | hsa:5145 | D00528 |
| Interactive | hsa:5146 | D00417 |
| Interactive | hsa:5146 | D00501 |
| Interactive | hsa:5146 | D00528 |
| Interactive | hsa:5147 | D00227 |
| Interactive | hsa:5147 | D00231 |
| Interactive | hsa:5147 | D00371 |
| Interactive | hsa:5147 | D00417 |
| Interactive | hsa:5147 | D00501 |
| Interactive | hsa:5147 | D00528 |
| Interactive | hsa:5147 | D00691 |
| Interactive | hsa:5147 | D01133 |
| Interactive | hsa:5147 | D01198 |
| Interactive | hsa:5147 | D01690 |
| Interactive | hsa:5147 | D01704 |
| Interactive | hsa:5147 | D01712 |
| Interactive | hsa:5147 | D02008 |
| Interactive | hsa:5147 | D02017 |

|             |          |        |
|-------------|----------|--------|
| Interactive | hsa:5147 | D02042 |
| Interactive | hsa:5147 | D02229 |
| Interactive | hsa:5147 | D02655 |
| Interactive | hsa:5147 | D02731 |
| Interactive | hsa:5148 | D00227 |
| Interactive | hsa:5148 | D00231 |
| Interactive | hsa:5148 | D00371 |
| Interactive | hsa:5148 | D00417 |
| Interactive | hsa:5148 | D00501 |
| Interactive | hsa:5148 | D00528 |
| Interactive | hsa:5148 | D00691 |
| Interactive | hsa:5148 | D01133 |
| Interactive | hsa:5148 | D01198 |
| Interactive | hsa:5148 | D01690 |
| Interactive | hsa:5148 | D01704 |
| Interactive | hsa:5148 | D01712 |
| Interactive | hsa:5148 | D02008 |
| Interactive | hsa:5148 | D02017 |
| Interactive | hsa:5148 | D02042 |
| Interactive | hsa:5148 | D02229 |
| Interactive | hsa:5148 | D02655 |
| Interactive | hsa:5148 | D02731 |
| Interactive | hsa:5149 | D00227 |
| Interactive | hsa:5149 | D00231 |
| Interactive | hsa:5149 | D00371 |
| Interactive | hsa:5149 | D00417 |
| Interactive | hsa:5149 | D00501 |
| Interactive | hsa:5149 | D00528 |
| Interactive | hsa:5149 | D00691 |
| Interactive | hsa:5149 | D01133 |
| Interactive | hsa:5149 | D01198 |
| Interactive | hsa:5149 | D01690 |
| Interactive | hsa:5149 | D01704 |
| Interactive | hsa:5149 | D01712 |
| Interactive | hsa:5149 | D02008 |
| Interactive | hsa:5149 | D02017 |
| Interactive | hsa:5149 | D02042 |
| Interactive | hsa:5149 | D02229 |
| Interactive | hsa:5149 | D02655 |
| Interactive | hsa:5149 | D02731 |
| Interactive | hsa:5150 | D00227 |
| Interactive | hsa:5150 | D00231 |

|             |          |        |
|-------------|----------|--------|
| Interactive | hsa:5150 | D00371 |
| Interactive | hsa:5150 | D00417 |
| Interactive | hsa:5150 | D01133 |
| Interactive | hsa:5150 | D01198 |
| Interactive | hsa:5150 | D01332 |
| Interactive | hsa:5150 | D01690 |
| Interactive | hsa:5150 | D01704 |
| Interactive | hsa:5150 | D01712 |
| Interactive | hsa:5150 | D02008 |
| Interactive | hsa:5150 | D02017 |
| Interactive | hsa:5150 | D02042 |
| Interactive | hsa:5150 | D02229 |
| Interactive | hsa:5150 | D02655 |
| Interactive | hsa:5150 | D02731 |
| Interactive | hsa:5151 | D00227 |
| Interactive | hsa:5151 | D00231 |
| Interactive | hsa:5151 | D00371 |
| Interactive | hsa:5151 | D00417 |
| Interactive | hsa:5151 | D00501 |
| Interactive | hsa:5151 | D00528 |
| Interactive | hsa:5151 | D00691 |
| Interactive | hsa:5151 | D01133 |
| Interactive | hsa:5151 | D01198 |
| Interactive | hsa:5151 | D01690 |
| Interactive | hsa:5151 | D01704 |
| Interactive | hsa:5151 | D01712 |
| Interactive | hsa:5151 | D02008 |
| Interactive | hsa:5151 | D02017 |
| Interactive | hsa:5151 | D02042 |
| Interactive | hsa:5151 | D02229 |
| Interactive | hsa:5151 | D02655 |
| Interactive | hsa:5151 | D02731 |
| Interactive | hsa:5152 | D00227 |
| Interactive | hsa:5152 | D00231 |
| Interactive | hsa:5152 | D00371 |
| Interactive | hsa:5152 | D00417 |
| Interactive | hsa:5152 | D00501 |
| Interactive | hsa:5152 | D00528 |
| Interactive | hsa:5152 | D01133 |
| Interactive | hsa:5152 | D01198 |
| Interactive | hsa:5152 | D01690 |
| Interactive | hsa:5152 | D01704 |

|             |           |        |
|-------------|-----------|--------|
| Interactive | hsa:5152  | D01712 |
| Interactive | hsa:5152  | D02008 |
| Interactive | hsa:5152  | D02017 |
| Interactive | hsa:5152  | D02042 |
| Interactive | hsa:5152  | D02229 |
| Interactive | hsa:5152  | D02655 |
| Interactive | hsa:5152  | D02731 |
| Interactive | hsa:5156  | D01441 |
| Interactive | hsa:5156  | D01977 |
| Interactive | hsa:5156  | D03218 |
| Interactive | hsa:5156  | D03350 |
| Interactive | hsa:5156  | D04024 |
| Interactive | hsa:5156  | D04025 |
| Interactive | hsa:5158  | D00417 |
| Interactive | hsa:5158  | D00501 |
| Interactive | hsa:5158  | D00528 |
| Interactive | hsa:5159  | D01441 |
| Interactive | hsa:5159  | D01977 |
| Interactive | hsa:5159  | D03218 |
| Interactive | hsa:5159  | D03350 |
| Interactive | hsa:5159  | D04024 |
| Interactive | hsa:5159  | D04025 |
| Interactive | hsa:51645 | D00107 |
| Interactive | hsa:5167  | D00043 |
| Interactive | hsa:5167  | D00417 |
| Interactive | hsa:5167  | D00423 |
| Interactive | hsa:5167  | D00501 |
| Interactive | hsa:5167  | D00528 |
| Interactive | hsa:5168  | D00417 |
| Interactive | hsa:5168  | D00501 |
| Interactive | hsa:5168  | D00528 |
| Interactive | hsa:5169  | D00417 |
| Interactive | hsa:5169  | D00501 |
| Interactive | hsa:5169  | D00528 |
| Interactive | hsa:51727 | D02368 |
| Interactive | hsa:51    | D00185 |
| Interactive | hsa:51    | D00293 |
| Interactive | hsa:51    | D00332 |
| Interactive | hsa:51    | D00530 |
| Interactive | hsa:51    | D00549 |
| Interactive | hsa:5294  | D03670 |
| Interactive | hsa:52    | D00103 |

|             |          |        |
|-------------|----------|--------|
| Interactive | hsa:5319 | D01223 |
| Interactive | hsa:5320 | D01223 |
| Interactive | hsa:5321 | D00324 |
| Interactive | hsa:5321 | D00325 |
| Interactive | hsa:5321 | D00328 |
| Interactive | hsa:5321 | D01223 |
| Interactive | hsa:5321 | D01367 |
| Interactive | hsa:5321 | D01825 |
| Interactive | hsa:5321 | D02289 |
| Interactive | hsa:5322 | D01223 |
| Interactive | hsa:5327 | D00043 |
| Interactive | hsa:5327 | D00160 |
| Interactive | hsa:5328 | D00043 |
| Interactive | hsa:5328 | D00160 |
| Interactive | hsa:5328 | D01136 |
| Interactive | hsa:5330 | D00417 |
| Interactive | hsa:5330 | D00501 |
| Interactive | hsa:5330 | D00528 |
| Interactive | hsa:5331 | D00417 |
| Interactive | hsa:5331 | D00501 |
| Interactive | hsa:5331 | D00528 |
| Interactive | hsa:5332 | D00417 |
| Interactive | hsa:5332 | D00501 |
| Interactive | hsa:5332 | D00528 |
| Interactive | hsa:5333 | D00417 |
| Interactive | hsa:5333 | D00501 |
| Interactive | hsa:5333 | D00528 |
| Interactive | hsa:5335 | D00417 |
| Interactive | hsa:5335 | D00501 |
| Interactive | hsa:5335 | D00528 |
| Interactive | hsa:5336 | D00417 |
| Interactive | hsa:5336 | D00501 |
| Interactive | hsa:5336 | D00528 |
| Interactive | hsa:5337 | D00417 |
| Interactive | hsa:5337 | D00501 |
| Interactive | hsa:5337 | D00528 |
| Interactive | hsa:5338 | D00417 |
| Interactive | hsa:5338 | D00501 |
| Interactive | hsa:5338 | D00528 |
| Interactive | hsa:5340 | D00043 |
| Interactive | hsa:5340 | D00160 |
| Interactive | hsa:5340 | D01136 |

|             |           |        |
|-------------|-----------|--------|
| Interactive | hsa:5351  | D00018 |
| Interactive | hsa:53938 | D00107 |
| Interactive | hsa:53    | D00103 |
| Interactive | hsa:5406  | D01223 |
| Interactive | hsa:5406  | D01346 |
| Interactive | hsa:5406  | D04028 |
| Interactive | hsa:5407  | D01223 |
| Interactive | hsa:5407  | D04028 |
| Interactive | hsa:5408  | D01223 |
| Interactive | hsa:5408  | D04028 |
| Interactive | hsa:5422  | D01907 |
| Interactive | hsa:5423  | D00168 |
| Interactive | hsa:5444  | D00043 |
| Interactive | hsa:5445  | D00043 |
| Interactive | hsa:5447  | D00208 |
| Interactive | hsa:5447  | D00965 |
| Interactive | hsa:54490 | D01276 |
| Interactive | hsa:54575 | D01276 |
| Interactive | hsa:54576 | D01276 |
| Interactive | hsa:54577 | D01276 |
| Interactive | hsa:54578 | D01276 |
| Interactive | hsa:54579 | D01276 |
| Interactive | hsa:54600 | D01276 |
| Interactive | hsa:54657 | D01276 |
| Interactive | hsa:54658 | D01276 |
| Interactive | hsa:54659 | D01276 |
| Interactive | hsa:54677 | D02176 |
| Interactive | hsa:5470  | D00107 |
| Interactive | hsa:5470  | D00184 |
| Interactive | hsa:5475  | D00107 |
| Interactive | hsa:5475  | D00184 |
| Interactive | hsa:5476  | D00043 |
| Interactive | hsa:5478  | D00107 |
| Interactive | hsa:5479  | D00107 |
| Interactive | hsa:5481  | D00107 |
| Interactive | hsa:54878 | D00043 |
| Interactive | hsa:5494  | D00107 |
| Interactive | hsa:5494  | D00184 |
| Interactive | hsa:5495  | D00107 |
| Interactive | hsa:5495  | D00184 |
| Interactive | hsa:5496  | D00107 |
| Interactive | hsa:5496  | D00184 |



|             |           |        |
|-------------|-----------|--------|
| Interactive | hsa:5499  | D00107 |
| Interactive | hsa:5499  | D00184 |
| Interactive | hsa:54    | D00103 |
| Interactive | hsa:5500  | D00107 |
| Interactive | hsa:5500  | D00184 |
| Interactive | hsa:5501  | D00107 |
| Interactive | hsa:5501  | D00184 |
| Interactive | hsa:5515  | D00107 |
| Interactive | hsa:5515  | D00184 |
| Interactive | hsa:5516  | D00107 |
| Interactive | hsa:5516  | D00184 |
| Interactive | hsa:5523  | D00107 |
| Interactive | hsa:5523  | D00184 |
| Interactive | hsa:5530  | D00107 |
| Interactive | hsa:5530  | D00184 |
| Interactive | hsa:55312 | D00050 |
| Interactive | hsa:5531  | D00107 |
| Interactive | hsa:5531  | D00184 |
| Interactive | hsa:5532  | D00107 |
| Interactive | hsa:5532  | D00184 |
| Interactive | hsa:5533  | D00107 |
| Interactive | hsa:5533  | D00184 |
| Interactive | hsa:55359 | D01441 |
| Interactive | hsa:5536  | D00107 |
| Interactive | hsa:5536  | D00184 |
| Interactive | hsa:5537  | D00107 |
| Interactive | hsa:5537  | D00184 |
| Interactive | hsa:5538  | D05341 |
| Interactive | hsa:5547  | D00043 |
| Interactive | hsa:5550  | D00043 |
| Interactive | hsa:5550  | D00160 |
| Interactive | hsa:55512 | D00417 |
| Interactive | hsa:55512 | D00501 |
| Interactive | hsa:55512 | D00528 |
| Interactive | hsa:5562  | D02769 |
| Interactive | hsa:55775 | D00417 |
| Interactive | hsa:55775 | D00501 |
| Interactive | hsa:55775 | D00528 |
| Interactive | hsa:55811 | D00002 |
| Interactive | hsa:558   | D01441 |
| Interactive | hsa:558   | D01977 |
| Interactive | hsa:558   | D03218 |

|             |           |        |
|-------------|-----------|--------|
| Interactive | hsa:558   | D03350 |
| Interactive | hsa:558   | D04024 |
| Interactive | hsa:558   | D04025 |
| Interactive | hsa:55902 | D02769 |
| Interactive | hsa:5594  | D01840 |
| Interactive | hsa:5594  | D03115 |
| Interactive | hsa:5594  | D03736 |
| Interactive | hsa:5595  | D01840 |
| Interactive | hsa:5595  | D03115 |
| Interactive | hsa:5595  | D03736 |
| Interactive | hsa:5596  | D01840 |
| Interactive | hsa:5596  | D03115 |
| Interactive | hsa:5596  | D03736 |
| Interactive | hsa:5597  | D01840 |
| Interactive | hsa:5597  | D03115 |
| Interactive | hsa:5597  | D03736 |
| Interactive | hsa:5598  | D01840 |
| Interactive | hsa:5598  | D03115 |
| Interactive | hsa:5598  | D03736 |
| Interactive | hsa:5599  | D01840 |
| Interactive | hsa:5599  | D03115 |
| Interactive | hsa:5599  | D03736 |
| Interactive | hsa:55    | D00103 |
| Interactive | hsa:5600  | D01840 |
| Interactive | hsa:5600  | D03115 |
| Interactive | hsa:5600  | D03736 |
| Interactive | hsa:5601  | D01840 |
| Interactive | hsa:5601  | D03115 |
| Interactive | hsa:5601  | D03736 |
| Interactive | hsa:5602  | D01840 |
| Interactive | hsa:5602  | D03115 |
| Interactive | hsa:5602  | D03736 |
| Interactive | hsa:5603  | D01840 |
| Interactive | hsa:5603  | D03115 |
| Interactive | hsa:5603  | D03736 |
| Interactive | hsa:5604  | D01441 |
| Interactive | hsa:5605  | D01441 |
| Interactive | hsa:5606  | D01441 |
| Interactive | hsa:5607  | D01441 |
| Interactive | hsa:5608  | D01441 |
| Interactive | hsa:5624  | D02335 |
| Interactive | hsa:5625  | D00035 |

|             |           |        |
|-------------|-----------|--------|
| Interactive | hsa:5645  | D00043 |
| Interactive | hsa:5645  | D00160 |
| Interactive | hsa:5646  | D00043 |
| Interactive | hsa:5646  | D00160 |
| Interactive | hsa:5650  | D00043 |
| Interactive | hsa:5650  | D00160 |
| Interactive | hsa:5651  | D00043 |
| Interactive | hsa:5651  | D00160 |
| Interactive | hsa:5657  | D00043 |
| Interactive | hsa:5657  | D00160 |
| Interactive | hsa:56922 | D00029 |
| Interactive | hsa:57016 | D00136 |
| Interactive | hsa:57176 | D00039 |
| Interactive | hsa:5740  | D00139 |
| Interactive | hsa:5740  | D00225 |
| Interactive | hsa:5740  | D00380 |
| Interactive | hsa:5740  | D00394 |
| Interactive | hsa:5740  | D00410 |
| Interactive | hsa:5740  | D00437 |
| Interactive | hsa:5740  | D00510 |
| Interactive | hsa:5740  | D00528 |
| Interactive | hsa:5740  | D00542 |
| Interactive | hsa:5740  | D00574 |
| Interactive | hsa:5740  | D01071 |
| Interactive | hsa:5740  | D03670 |
| Interactive | hsa:5742  | D00097 |
| Interactive | hsa:5742  | D00109 |
| Interactive | hsa:5742  | D00118 |
| Interactive | hsa:5742  | D00120 |
| Interactive | hsa:5742  | D00126 |
| Interactive | hsa:5742  | D00127 |
| Interactive | hsa:5742  | D00130 |
| Interactive | hsa:5742  | D00132 |
| Interactive | hsa:5742  | D00141 |
| Interactive | hsa:5742  | D00158 |
| Interactive | hsa:5742  | D00169 |
| Interactive | hsa:5742  | D00217 |
| Interactive | hsa:5742  | D00315 |
| Interactive | hsa:5742  | D00330 |
| Interactive | hsa:5742  | D00377 |
| Interactive | hsa:5742  | D00425 |
| Interactive | hsa:5742  | D00452 |

|             |          |        |
|-------------|----------|--------|
| Interactive | hsa:5742 | D00463 |
| Interactive | hsa:5742 | D00510 |
| Interactive | hsa:5742 | D00566 |
| Interactive | hsa:5742 | D00567 |
| Interactive | hsa:5742 | D00568 |
| Interactive | hsa:5742 | D00810 |
| Interactive | hsa:5742 | D00813 |
| Interactive | hsa:5742 | D00827 |
| Interactive | hsa:5742 | D00903 |
| Interactive | hsa:5742 | D00904 |
| Interactive | hsa:5742 | D00968 |
| Interactive | hsa:5742 | D00969 |
| Interactive | hsa:5742 | D00970 |
| Interactive | hsa:5742 | D01122 |
| Interactive | hsa:5742 | D01183 |
| Interactive | hsa:5742 | D01325 |
| Interactive | hsa:5742 | D01364 |
| Interactive | hsa:5742 | D01397 |
| Interactive | hsa:5742 | D01475 |
| Interactive | hsa:5742 | D01513 |
| Interactive | hsa:5742 | D01547 |
| Interactive | hsa:5742 | D01565 |
| Interactive | hsa:5742 | D01578 |
| Interactive | hsa:5742 | D01582 |
| Interactive | hsa:5742 | D01709 |
| Interactive | hsa:5742 | D01718 |
| Interactive | hsa:5742 | D01765 |
| Interactive | hsa:5742 | D01767 |
| Interactive | hsa:5742 | D01811 |
| Interactive | hsa:5742 | D01866 |
| Interactive | hsa:5742 | D01974 |
| Interactive | hsa:5742 | D02110 |
| Interactive | hsa:5742 | D02290 |
| Interactive | hsa:5742 | D02341 |
| Interactive | hsa:5742 | D02350 |
| Interactive | hsa:5742 | D02355 |
| Interactive | hsa:5742 | D02709 |
| Interactive | hsa:5742 | D03689 |
| Interactive | hsa:5742 | D03710 |
| Interactive | hsa:5742 | D03712 |
| Interactive | hsa:5742 | D03714 |
| Interactive | hsa:5742 | D03716 |

|             |          |        |
|-------------|----------|--------|
| Interactive | hsa:5742 | D03717 |
| Interactive | hsa:5743 | D00109 |
| Interactive | hsa:5743 | D00118 |
| Interactive | hsa:5743 | D00120 |
| Interactive | hsa:5743 | D00126 |
| Interactive | hsa:5743 | D00127 |
| Interactive | hsa:5743 | D00130 |
| Interactive | hsa:5743 | D00132 |
| Interactive | hsa:5743 | D00141 |
| Interactive | hsa:5743 | D00158 |
| Interactive | hsa:5743 | D00169 |
| Interactive | hsa:5743 | D00217 |
| Interactive | hsa:5743 | D00315 |
| Interactive | hsa:5743 | D00330 |
| Interactive | hsa:5743 | D00377 |
| Interactive | hsa:5743 | D00425 |
| Interactive | hsa:5743 | D00449 |
| Interactive | hsa:5743 | D00452 |
| Interactive | hsa:5743 | D00463 |
| Interactive | hsa:5743 | D00510 |
| Interactive | hsa:5743 | D00566 |
| Interactive | hsa:5743 | D00567 |
| Interactive | hsa:5743 | D00568 |
| Interactive | hsa:5743 | D00810 |
| Interactive | hsa:5743 | D00813 |
| Interactive | hsa:5743 | D00827 |
| Interactive | hsa:5743 | D00903 |
| Interactive | hsa:5743 | D00904 |
| Interactive | hsa:5743 | D00968 |
| Interactive | hsa:5743 | D00969 |
| Interactive | hsa:5743 | D00970 |
| Interactive | hsa:5743 | D01122 |
| Interactive | hsa:5743 | D01183 |
| Interactive | hsa:5743 | D01325 |
| Interactive | hsa:5743 | D01364 |
| Interactive | hsa:5743 | D01397 |
| Interactive | hsa:5743 | D01475 |
| Interactive | hsa:5743 | D01513 |
| Interactive | hsa:5743 | D01547 |
| Interactive | hsa:5743 | D01565 |
| Interactive | hsa:5743 | D01578 |
| Interactive | hsa:5743 | D01582 |

|             |           |        |
|-------------|-----------|--------|
| Interactive | hsa:5743  | D01709 |
| Interactive | hsa:5743  | D01718 |
| Interactive | hsa:5743  | D01765 |
| Interactive | hsa:5743  | D01767 |
| Interactive | hsa:5743  | D01811 |
| Interactive | hsa:5743  | D01866 |
| Interactive | hsa:5743  | D01974 |
| Interactive | hsa:5743  | D02110 |
| Interactive | hsa:5743  | D02290 |
| Interactive | hsa:5743  | D02341 |
| Interactive | hsa:5743  | D02350 |
| Interactive | hsa:5743  | D02355 |
| Interactive | hsa:5743  | D02709 |
| Interactive | hsa:5743  | D03689 |
| Interactive | hsa:5743  | D03710 |
| Interactive | hsa:5743  | D03712 |
| Interactive | hsa:5743  | D03714 |
| Interactive | hsa:5743  | D03716 |
| Interactive | hsa:5743  | D03717 |
| Interactive | hsa:5747  | D01441 |
| Interactive | hsa:5754  | D01441 |
| Interactive | hsa:5754  | D01977 |
| Interactive | hsa:5754  | D03218 |
| Interactive | hsa:5754  | D03350 |
| Interactive | hsa:5754  | D04024 |
| Interactive | hsa:5754  | D04025 |
| Interactive | hsa:57665 | D00501 |
| Interactive | hsa:58190 | D00107 |
| Interactive | hsa:58190 | D00184 |
| Interactive | hsa:5831  | D00035 |
| Interactive | hsa:5834  | D02769 |
| Interactive | hsa:5836  | D02769 |
| Interactive | hsa:5837  | D02769 |
| Interactive | hsa:5860  | D00002 |
| Interactive | hsa:586   | D00039 |
| Interactive | hsa:586   | D00065 |
| Interactive | hsa:586   | D00332 |
| Interactive | hsa:587   | D00065 |
| Interactive | hsa:587   | D00332 |
| Interactive | hsa:590   | D00043 |
| Interactive | hsa:590   | D00196 |
| Interactive | hsa:590   | D00667 |

|             |           |        |
|-------------|-----------|--------|
| Interactive | hsa:590   | D00670 |
| Interactive | hsa:590   | D00733 |
| Interactive | hsa:590   | D00805 |
| Interactive | hsa:590   | D01118 |
| Interactive | hsa:590   | D01223 |
| Interactive | hsa:590   | D02193 |
| Interactive | hsa:590   | D02729 |
| Interactive | hsa:590   | D03822 |
| Interactive | hsa:5972  | D03738 |
| Interactive | hsa:5972  | D03741 |
| Interactive | hsa:5972  | D03743 |
| Interactive | hsa:5979  | D01441 |
| Interactive | hsa:5979  | D01977 |
| Interactive | hsa:5979  | D03218 |
| Interactive | hsa:5979  | D03350 |
| Interactive | hsa:5979  | D04024 |
| Interactive | hsa:5979  | D04025 |
| Interactive | hsa:6098  | D01441 |
| Interactive | hsa:6098  | D01977 |
| Interactive | hsa:6098  | D03218 |
| Interactive | hsa:6098  | D03350 |
| Interactive | hsa:6098  | D04024 |
| Interactive | hsa:6098  | D04025 |
| Interactive | hsa:613   | D01441 |
| Interactive | hsa:6240  | D01907 |
| Interactive | hsa:6240  | D02368 |
| Interactive | hsa:6240  | D03670 |
| Interactive | hsa:6241  | D03670 |
| Interactive | hsa:6259  | D01441 |
| Interactive | hsa:6259  | D01977 |
| Interactive | hsa:6259  | D03218 |
| Interactive | hsa:6259  | D03350 |
| Interactive | hsa:6259  | D04024 |
| Interactive | hsa:6259  | D04025 |
| Interactive | hsa:6300  | D01840 |
| Interactive | hsa:6300  | D03115 |
| Interactive | hsa:6300  | D03736 |
| Interactive | hsa:63036 | D00043 |
| Interactive | hsa:63036 | D00160 |
| Interactive | hsa:635   | D00037 |
| Interactive | hsa:63904 | D00107 |
| Interactive | hsa:63904 | D00184 |

|             |           |        |
|-------------|-----------|--------|
| Interactive | hsa:64087 | D00029 |
| Interactive | hsa:6416  | D01441 |
| Interactive | hsa:64499 | D00043 |
| Interactive | hsa:64499 | D00160 |
| Interactive | hsa:645   | D00050 |
| Interactive | hsa:64600 | D01223 |
| Interactive | hsa:64802 | D00002 |
| Interactive | hsa:64816 | D00139 |
| Interactive | hsa:64816 | D00225 |
| Interactive | hsa:64816 | D00380 |
| Interactive | hsa:64816 | D00394 |
| Interactive | hsa:64816 | D00410 |
| Interactive | hsa:64816 | D00437 |
| Interactive | hsa:64816 | D00528 |
| Interactive | hsa:64816 | D00542 |
| Interactive | hsa:64816 | D00574 |
| Interactive | hsa:64816 | D00960 |
| Interactive | hsa:64816 | D00964 |
| Interactive | hsa:64816 | D01071 |
| Interactive | hsa:64816 | D01425 |
| Interactive | hsa:64816 | D02451 |
| Interactive | hsa:64816 | D03670 |
| Interactive | hsa:64816 | D03778 |
| Interactive | hsa:64816 | D03781 |
| Interactive | hsa:64816 | D03784 |
| Interactive | hsa:64850 | D00332 |
| Interactive | hsa:64902 | D00332 |
| Interactive | hsa:657   | D01441 |
| Interactive | hsa:658   | D01441 |
| Interactive | hsa:6609  | D00417 |
| Interactive | hsa:6609  | D00501 |
| Interactive | hsa:6609  | D00528 |
| Interactive | hsa:660   | D01441 |
| Interactive | hsa:6610  | D00417 |
| Interactive | hsa:6610  | D00501 |
| Interactive | hsa:6610  | D00528 |
| Interactive | hsa:6646  | D01966 |
| Interactive | hsa:6646  | D03012 |
| Interactive | hsa:6646  | D03734 |
| Interactive | hsa:6646  | D03735 |
| Interactive | hsa:6652  | D00002 |
| Interactive | hsa:670   | D01223 |



|             |          |        |
|-------------|----------|--------|
| Interactive | hsa:6713 | D02375 |
| Interactive | hsa:6714 | D01441 |
| Interactive | hsa:6716 | D03034 |
| Interactive | hsa:6725 | D01441 |
| Interactive | hsa:6768 | D00043 |
| Interactive | hsa:6768 | D00160 |
| Interactive | hsa:6799 | D00217 |
| Interactive | hsa:6799 | D00418 |
| Interactive | hsa:683  | D00036 |
| Interactive | hsa:686  | D00029 |
| Interactive | hsa:6897 | D00041 |
| Interactive | hsa:6898 | D00021 |
| Interactive | hsa:6898 | D00332 |
| Interactive | hsa:695  | D01441 |
| Interactive | hsa:7006 | D01441 |
| Interactive | hsa:7010 | D01441 |
| Interactive | hsa:7010 | D01977 |
| Interactive | hsa:7010 | D03218 |
| Interactive | hsa:7010 | D03350 |
| Interactive | hsa:7010 | D04024 |
| Interactive | hsa:7010 | D04025 |
| Interactive | hsa:7015 | D00579 |
| Interactive | hsa:7015 | D02267 |
| Interactive | hsa:7046 | D01441 |
| Interactive | hsa:7054 | D00021 |
| Interactive | hsa:7054 | D00762 |
| Interactive | hsa:7075 | D01441 |
| Interactive | hsa:7075 | D01977 |
| Interactive | hsa:7075 | D03218 |
| Interactive | hsa:7075 | D03350 |
| Interactive | hsa:7075 | D04024 |
| Interactive | hsa:7075 | D04025 |
| Interactive | hsa:7083 | D00584 |
| Interactive | hsa:7084 | D00584 |
| Interactive | hsa:7150 | D01061 |
| Interactive | hsa:7150 | D01432 |
| Interactive | hsa:7150 | D01911 |
| Interactive | hsa:7150 | D02168 |
| Interactive | hsa:7150 | D02756 |
| Interactive | hsa:7150 | D04031 |
| Interactive | hsa:7153 | D00125 |
| Interactive | hsa:7153 | D00183 |

|             |          |        |
|-------------|----------|--------|
| Interactive | hsa:7153 | D00186 |
| Interactive | hsa:7153 | D01264 |
| Interactive | hsa:7153 | D01275 |
| Interactive | hsa:7153 | D01885 |
| Interactive | hsa:7153 | D01911 |
| Interactive | hsa:7153 | D02166 |
| Interactive | hsa:7153 | D02214 |
| Interactive | hsa:7153 | D02321 |
| Interactive | hsa:7153 | D02333 |
| Interactive | hsa:7153 | D02698 |
| Interactive | hsa:7153 | D02756 |
| Interactive | hsa:7153 | D03899 |
| Interactive | hsa:7155 | D00125 |
| Interactive | hsa:7155 | D00183 |
| Interactive | hsa:7155 | D00186 |
| Interactive | hsa:7155 | D01264 |
| Interactive | hsa:7155 | D01275 |
| Interactive | hsa:7155 | D01885 |
| Interactive | hsa:7155 | D01911 |
| Interactive | hsa:7155 | D02166 |
| Interactive | hsa:7155 | D02214 |
| Interactive | hsa:7155 | D02321 |
| Interactive | hsa:7155 | D02333 |
| Interactive | hsa:7155 | D02698 |
| Interactive | hsa:7155 | D02756 |
| Interactive | hsa:7155 | D03899 |
| Interactive | hsa:7156 | D01061 |
| Interactive | hsa:7156 | D01432 |
| Interactive | hsa:7156 | D01911 |
| Interactive | hsa:7156 | D02168 |
| Interactive | hsa:7156 | D02756 |
| Interactive | hsa:7156 | D04031 |
| Interactive | hsa:7172 | D00377 |
| Interactive | hsa:7173 | D00401 |
| Interactive | hsa:7173 | D00562 |
| Interactive | hsa:7174 | D00043 |
| Interactive | hsa:7174 | D00160 |
| Interactive | hsa:7294 | D01441 |
| Interactive | hsa:7297 | D01441 |
| Interactive | hsa:7298 | D00584 |
| Interactive | hsa:7298 | D01064 |
| Interactive | hsa:7298 | D01211 |

|             |          |        |
|-------------|----------|--------|
| Interactive | hsa:7298 | D01223 |
| Interactive | hsa:7298 | D02368 |
| Interactive | hsa:7298 | D03828 |
| Interactive | hsa:7298 | D04197 |
| Interactive | hsa:7299 | D03034 |
| Interactive | hsa:7301 | D01441 |
| Interactive | hsa:7301 | D01977 |
| Interactive | hsa:7301 | D03218 |
| Interactive | hsa:7301 | D03350 |
| Interactive | hsa:7301 | D04024 |
| Interactive | hsa:7301 | D04025 |
| Interactive | hsa:7363 | D01276 |
| Interactive | hsa:7364 | D01276 |
| Interactive | hsa:7365 | D01276 |
| Interactive | hsa:7366 | D01276 |
| Interactive | hsa:7367 | D01276 |
| Interactive | hsa:7371 | D00037 |
| Interactive | hsa:7372 | D00584 |
| Interactive | hsa:7378 | D00584 |
| Interactive | hsa:7453 | D00401 |
| Interactive | hsa:7453 | D00562 |
| Interactive | hsa:7498 | D00005 |
| Interactive | hsa:7498 | D00224 |
| Interactive | hsa:7525 | D01441 |
| Interactive | hsa:7535 | D01441 |
| Interactive | hsa:759  | D00218 |
| Interactive | hsa:759  | D00294 |
| Interactive | hsa:759  | D00340 |
| Interactive | hsa:759  | D00518 |
| Interactive | hsa:759  | D00519 |
| Interactive | hsa:759  | D00538 |
| Interactive | hsa:759  | D00650 |
| Interactive | hsa:759  | D00651 |
| Interactive | hsa:759  | D00652 |
| Interactive | hsa:759  | D00653 |
| Interactive | hsa:759  | D00654 |
| Interactive | hsa:759  | D00655 |
| Interactive | hsa:759  | D00656 |
| Interactive | hsa:759  | D00658 |
| Interactive | hsa:759  | D00703 |
| Interactive | hsa:759  | D00709 |
| Interactive | hsa:759  | D01196 |

|             |         |        |
|-------------|---------|--------|
| Interactive | hsa:759 | D01256 |
| Interactive | hsa:759 | D02356 |
| Interactive | hsa:759 | D02441 |
| Interactive | hsa:760 | D00218 |
| Interactive | hsa:760 | D00294 |
| Interactive | hsa:760 | D00340 |
| Interactive | hsa:760 | D00518 |
| Interactive | hsa:760 | D00519 |
| Interactive | hsa:760 | D00537 |
| Interactive | hsa:760 | D00538 |
| Interactive | hsa:760 | D00650 |
| Interactive | hsa:760 | D00651 |
| Interactive | hsa:760 | D00652 |
| Interactive | hsa:760 | D00653 |
| Interactive | hsa:760 | D00654 |
| Interactive | hsa:760 | D00655 |
| Interactive | hsa:760 | D00656 |
| Interactive | hsa:760 | D00658 |
| Interactive | hsa:760 | D00703 |
| Interactive | hsa:760 | D01196 |
| Interactive | hsa:760 | D01256 |
| Interactive | hsa:761 | D00218 |
| Interactive | hsa:761 | D00340 |
| Interactive | hsa:761 | D00518 |
| Interactive | hsa:761 | D00519 |
| Interactive | hsa:761 | D00538 |
| Interactive | hsa:761 | D00652 |
| Interactive | hsa:761 | D00653 |
| Interactive | hsa:761 | D00655 |
| Interactive | hsa:761 | D01196 |
| Interactive | hsa:762 | D00218 |
| Interactive | hsa:762 | D00294 |
| Interactive | hsa:762 | D00340 |
| Interactive | hsa:762 | D00518 |
| Interactive | hsa:762 | D00519 |
| Interactive | hsa:762 | D00537 |
| Interactive | hsa:762 | D00538 |
| Interactive | hsa:762 | D00650 |
| Interactive | hsa:762 | D00651 |
| Interactive | hsa:762 | D00652 |
| Interactive | hsa:762 | D00653 |
| Interactive | hsa:762 | D00654 |

|             |         |        |
|-------------|---------|--------|
| Interactive | hsa:762 | D00655 |
| Interactive | hsa:762 | D00656 |
| Interactive | hsa:762 | D00658 |
| Interactive | hsa:762 | D01196 |
| Interactive | hsa:762 | D01256 |
| Interactive | hsa:763 | D00218 |
| Interactive | hsa:763 | D00340 |
| Interactive | hsa:763 | D00518 |
| Interactive | hsa:763 | D00519 |
| Interactive | hsa:763 | D00538 |
| Interactive | hsa:763 | D00652 |
| Interactive | hsa:763 | D00653 |
| Interactive | hsa:763 | D00655 |
| Interactive | hsa:763 | D01196 |
| Interactive | hsa:765 | D00218 |
| Interactive | hsa:765 | D00340 |
| Interactive | hsa:765 | D00518 |
| Interactive | hsa:765 | D00519 |
| Interactive | hsa:765 | D00538 |
| Interactive | hsa:765 | D00652 |
| Interactive | hsa:765 | D00653 |
| Interactive | hsa:765 | D00655 |
| Interactive | hsa:765 | D01196 |
| Interactive | hsa:766 | D00218 |
| Interactive | hsa:766 | D00340 |
| Interactive | hsa:766 | D00518 |
| Interactive | hsa:766 | D00519 |
| Interactive | hsa:766 | D00538 |
| Interactive | hsa:766 | D00652 |
| Interactive | hsa:766 | D00653 |
| Interactive | hsa:766 | D00655 |
| Interactive | hsa:766 | D01196 |
| Interactive | hsa:767 | D00218 |
| Interactive | hsa:767 | D00340 |
| Interactive | hsa:767 | D00518 |
| Interactive | hsa:767 | D00519 |
| Interactive | hsa:767 | D00538 |
| Interactive | hsa:767 | D00652 |
| Interactive | hsa:767 | D00653 |
| Interactive | hsa:767 | D00655 |
| Interactive | hsa:767 | D01196 |
| Interactive | hsa:768 | D00218 |

|             |           |        |
|-------------|-----------|--------|
| Interactive | hsa:768   | D00340 |
| Interactive | hsa:768   | D00518 |
| Interactive | hsa:768   | D00519 |
| Interactive | hsa:768   | D00538 |
| Interactive | hsa:768   | D00652 |
| Interactive | hsa:768   | D00653 |
| Interactive | hsa:768   | D00655 |
| Interactive | hsa:768   | D01196 |
| Interactive | hsa:771   | D00218 |
| Interactive | hsa:771   | D00340 |
| Interactive | hsa:771   | D00518 |
| Interactive | hsa:771   | D00519 |
| Interactive | hsa:771   | D00538 |
| Interactive | hsa:771   | D00652 |
| Interactive | hsa:771   | D00653 |
| Interactive | hsa:771   | D00655 |
| Interactive | hsa:771   | D01196 |
| Interactive | hsa:780   | D01441 |
| Interactive | hsa:780   | D01977 |
| Interactive | hsa:780   | D03218 |
| Interactive | hsa:780   | D03350 |
| Interactive | hsa:780   | D04024 |
| Interactive | hsa:780   | D04025 |
| Interactive | hsa:79001 | D02335 |
| Interactive | hsa:79001 | D03798 |
| Interactive | hsa:7957  | D00107 |
| Interactive | hsa:7957  | D00184 |
| Interactive | hsa:79799 | D01276 |
| Interactive | hsa:80339 | D01223 |
| Interactive | hsa:80339 | D04028 |
| Interactive | hsa:80824 | D00107 |
| Interactive | hsa:80824 | D00184 |
| Interactive | hsa:81579 | D01223 |
| Interactive | hsa:8192  | D00043 |
| Interactive | hsa:8192  | D00160 |
| Interactive | hsa:8288  | D00097 |
| Interactive | hsa:8288  | D00217 |
| Interactive | hsa:8288  | D00562 |
| Interactive | hsa:8288  | D00577 |
| Interactive | hsa:8288  | D03670 |
| Interactive | hsa:834   | D00496 |
| Interactive | hsa:8398  | D01223 |

|             |           |        |
|-------------|-----------|--------|
| Interactive | hsa:8399  | D01223 |
| Interactive | hsa:84152 | D00107 |
| Interactive | hsa:84152 | D00184 |
| Interactive | hsa:84171 | D00270 |
| Interactive | hsa:8435  | D01966 |
| Interactive | hsa:8435  | D03012 |
| Interactive | hsa:8435  | D03734 |
| Interactive | hsa:8435  | D03735 |
| Interactive | hsa:84532 | D02769 |
| Interactive | hsa:84618 | D00501 |
| Interactive | hsa:84695 | D00270 |
| Interactive | hsa:84706 | D00332 |
| Interactive | hsa:84812 | D00417 |
| Interactive | hsa:84812 | D00501 |
| Interactive | hsa:84812 | D00528 |
| Interactive | hsa:8513  | D01223 |
| Interactive | hsa:8513  | D04028 |
| Interactive | hsa:8529  | D00139 |
| Interactive | hsa:8529  | D00225 |
| Interactive | hsa:8529  | D00380 |
| Interactive | hsa:8529  | D00394 |
| Interactive | hsa:8529  | D00410 |
| Interactive | hsa:8529  | D00437 |
| Interactive | hsa:8529  | D00528 |
| Interactive | hsa:8529  | D00542 |
| Interactive | hsa:8529  | D00574 |
| Interactive | hsa:8529  | D01071 |
| Interactive | hsa:8529  | D03670 |
| Interactive | hsa:85313 | D00107 |
| Interactive | hsa:8555  | D00107 |
| Interactive | hsa:8555  | D00184 |
| Interactive | hsa:8556  | D00107 |
| Interactive | hsa:8556  | D00184 |
| Interactive | hsa:8622  | D00227 |
| Interactive | hsa:8622  | D00231 |
| Interactive | hsa:8622  | D00371 |
| Interactive | hsa:8622  | D00417 |
| Interactive | hsa:8622  | D00501 |
| Interactive | hsa:8622  | D00528 |
| Interactive | hsa:8622  | D00691 |
| Interactive | hsa:8622  | D01133 |
| Interactive | hsa:8622  | D01198 |

|             |          |        |
|-------------|----------|--------|
| Interactive | hsa:8622 | D01690 |
| Interactive | hsa:8622 | D01704 |
| Interactive | hsa:8622 | D01712 |
| Interactive | hsa:8622 | D02008 |
| Interactive | hsa:8622 | D02017 |
| Interactive | hsa:8622 | D02042 |
| Interactive | hsa:8622 | D02229 |
| Interactive | hsa:8622 | D02655 |
| Interactive | hsa:8622 | D02731 |
| Interactive | hsa:8654 | D00037 |
| Interactive | hsa:8654 | D00227 |
| Interactive | hsa:8654 | D00231 |
| Interactive | hsa:8654 | D00371 |
| Interactive | hsa:8654 | D00417 |
| Interactive | hsa:8654 | D00501 |
| Interactive | hsa:8654 | D00528 |
| Interactive | hsa:8654 | D01133 |
| Interactive | hsa:8654 | D01198 |
| Interactive | hsa:8654 | D01690 |
| Interactive | hsa:8654 | D01704 |
| Interactive | hsa:8654 | D01712 |
| Interactive | hsa:8654 | D02008 |
| Interactive | hsa:8654 | D02017 |
| Interactive | hsa:8654 | D02042 |
| Interactive | hsa:8654 | D02229 |
| Interactive | hsa:8654 | D02655 |
| Interactive | hsa:8654 | D02731 |
| Interactive | hsa:8836 | D00070 |
| Interactive | hsa:8854 | D00094 |
| Interactive | hsa:8940 | D01061 |
| Interactive | hsa:8940 | D01432 |
| Interactive | hsa:8940 | D01911 |
| Interactive | hsa:8940 | D02168 |
| Interactive | hsa:8940 | D02756 |
| Interactive | hsa:8940 | D04031 |
| Interactive | hsa:8972 | D00216 |
| Interactive | hsa:8972 | D00625 |
| Interactive | hsa:8972 | D01665 |
| Interactive | hsa:8972 | D03433 |
| Interactive | hsa:9023 | D00139 |
| Interactive | hsa:9023 | D00225 |
| Interactive | hsa:9023 | D00380 |



|                 |           |        |
|-----------------|-----------|--------|
| Interactive     | hsa:9023  | D00394 |
| Interactive     | hsa:9023  | D00410 |
| Interactive     | hsa:9023  | D00437 |
| Interactive     | hsa:9023  | D00528 |
| Interactive     | hsa:9023  | D00542 |
| Interactive     | hsa:9023  | D00574 |
| Interactive     | hsa:9023  | D01071 |
| Interactive     | hsa:9023  | D03670 |
| Interactive     | hsa:9088  | D01441 |
| Interactive     | hsa:90    | D01441 |
| Interactive     | hsa:91039 | D00043 |
| Interactive     | hsa:9150  | D00107 |
| Interactive     | hsa:9150  | D00184 |
| Interactive     | hsa:91    | D01441 |
| Interactive     | hsa:93650 | D00103 |
| Interactive     | hsa:9388  | D01223 |
| Interactive     | hsa:9388  | D04028 |
| Interactive     | hsa:93    | D01441 |
| Interactive     | hsa:94009 | D00043 |
| Interactive     | hsa:94009 | D00160 |
| Interactive     | hsa:9420  | D00139 |
| Interactive     | hsa:9420  | D00225 |
| Interactive     | hsa:9420  | D00380 |
| Interactive     | hsa:9420  | D00394 |
| Interactive     | hsa:9420  | D00410 |
| Interactive     | hsa:9420  | D00437 |
| Interactive     | hsa:9420  | D00528 |
| Interactive     | hsa:9420  | D00542 |
| Interactive     | hsa:9420  | D00574 |
| Interactive     | hsa:9420  | D01071 |
| Interactive     | hsa:94    | D01441 |
| Interactive     | hsa:9563  | D01223 |
| Interactive     | hsa:9601  | D03798 |
| Interactive     | hsa:9641  | D00448 |
| Interactive     | hsa:9647  | D00107 |
| Interactive     | hsa:9647  | D00184 |
| Interactive     | hsa:9945  | D00332 |
| Interactive     | hsa:9955  | D00037 |
| Non-interactive | hsa:10056 | D00503 |
| Non-interactive | hsa:10056 | D00650 |
| Non-interactive | hsa:10056 | D00733 |

|                 |           |        |
|-----------------|-----------|--------|
| Non-interactive | hsa:10056 | D01825 |
| Non-interactive | hsa:10056 | D02451 |
| Non-interactive | hsa:100   | D00005 |
| Non-interactive | hsa:100   | D00283 |
| Non-interactive | hsa:100   | D00753 |
| Non-interactive | hsa:100   | D03765 |
| Non-interactive | hsa:10188 | D00127 |
| Non-interactive | hsa:10188 | D00216 |
| Non-interactive | hsa:10188 | D00650 |
| Non-interactive | hsa:10188 | D01240 |
| Non-interactive | hsa:10188 | D03012 |
| Non-interactive | hsa:10188 | D03717 |
| Non-interactive | hsa:10269 | D01984 |
| Non-interactive | hsa:10279 | D00394 |
| Non-interactive | hsa:10279 | D00488 |
| Non-interactive | hsa:10279 | D01578 |
| Non-interactive | hsa:10279 | D02168 |
| Non-interactive | hsa:10279 | D02560 |
| Non-interactive | hsa:10279 | D03775 |
| Non-interactive | hsa:10295 | D00771 |
| Non-interactive | hsa:10295 | D02194 |
| Non-interactive | hsa:10295 | D02258 |
| Non-interactive | hsa:10327 | D00002 |
| Non-interactive | hsa:10327 | D00070 |
| Non-interactive | hsa:10327 | D00139 |
| Non-interactive | hsa:10327 | D00423 |
| Non-interactive | hsa:10327 | D00656 |
| Non-interactive | hsa:10327 | D01256 |
| Non-interactive | hsa:10327 | D01907 |
| Non-interactive | hsa:10327 | D01973 |
| Non-interactive | hsa:10327 | D02441 |
| Non-interactive | hsa:1033  | D00196 |
| Non-interactive | hsa:1033  | D00654 |
| Non-interactive | hsa:1033  | D00893 |
| Non-interactive | hsa:1033  | D01061 |
| Non-interactive | hsa:1033  | D01825 |
| Non-interactive | hsa:1033  | D02166 |
| Non-interactive | hsa:1033  | D02451 |
| Non-interactive | hsa:1033  | D02671 |
| Non-interactive | hsa:1033  | D03738 |
| Non-interactive | hsa:10461 | D00622 |
| Non-interactive | hsa:10461 | D00630 |

|                 |           |        |
|-----------------|-----------|--------|
| Non-interactive | hsa:10461 | D00965 |
| Non-interactive | hsa:10461 | D02328 |
| Non-interactive | hsa:10461 | D03643 |
| Non-interactive | hsa:10461 | D03778 |
| Non-interactive | hsa:10549 | D01332 |
| Non-interactive | hsa:10549 | D02418 |
| Non-interactive | hsa:1056  | D00315 |
| Non-interactive | hsa:1056  | D01974 |
| Non-interactive | hsa:1056  | D02115 |
| Non-interactive | hsa:10667 | D00018 |
| Non-interactive | hsa:10667 | D00094 |
| Non-interactive | hsa:10667 | D00398 |
| Non-interactive | hsa:10667 | D00651 |
| Non-interactive | hsa:10667 | D00965 |
| Non-interactive | hsa:10667 | D01718 |
| Non-interactive | hsa:10667 | D01866 |
| Non-interactive | hsa:10667 | D02487 |
| Non-interactive | hsa:10720 | D00107 |
| Non-interactive | hsa:10720 | D00620 |
| Non-interactive | hsa:10720 | D00947 |
| Non-interactive | hsa:10720 | D02214 |
| Non-interactive | hsa:10720 | D03743 |
| Non-interactive | hsa:10747 | D00965 |
| Non-interactive | hsa:10747 | D02671 |
| Non-interactive | hsa:10747 | D03218 |
| Non-interactive | hsa:10747 | D03805 |
| Non-interactive | hsa:107   | D00596 |
| Non-interactive | hsa:107   | D00969 |
| Non-interactive | hsa:107   | D01211 |
| Non-interactive | hsa:107   | D02258 |
| Non-interactive | hsa:107   | D02580 |
| Non-interactive | hsa:10825 | D00391 |
| Non-interactive | hsa:10825 | D00516 |
| Non-interactive | hsa:10825 | D00623 |
| Non-interactive | hsa:10825 | D02168 |
| Non-interactive | hsa:10825 | D03077 |
| Non-interactive | hsa:10846 | D00448 |
| Non-interactive | hsa:10846 | D01844 |
| Non-interactive | hsa:10846 | D02166 |
| Non-interactive | hsa:10846 | D02580 |
| Non-interactive | hsa:10846 | D03803 |
| Non-interactive | hsa:10858 | D00131 |

|                 |           |        |
|-----------------|-----------|--------|
| Non-interactive | hsa:10858 | D00533 |
| Non-interactive | hsa:10858 | D02368 |
| Non-interactive | hsa:10858 | D02655 |
| Non-interactive | hsa:10858 | D02731 |
| Non-interactive | hsa:10858 | D03077 |
| Non-interactive | hsa:10858 | D03720 |
| Non-interactive | hsa:108   | D00537 |
| Non-interactive | hsa:108   | D03643 |
| Non-interactive | hsa:108   | D03778 |
| Non-interactive | hsa:10901 | D00148 |
| Non-interactive | hsa:10901 | D00622 |
| Non-interactive | hsa:10901 | D01061 |
| Non-interactive | hsa:10901 | D01915 |
| Non-interactive | hsa:10901 | D03710 |
| Non-interactive | hsa:10901 | D03735 |
| Non-interactive | hsa:10901 | D03743 |
| Non-interactive | hsa:10901 | D04292 |
| Non-interactive | hsa:10924 | D00005 |
| Non-interactive | hsa:10924 | D01027 |
| Non-interactive | hsa:10924 | D01441 |
| Non-interactive | hsa:10924 | D02418 |
| Non-interactive | hsa:10924 | D02769 |
| Non-interactive | hsa:10935 | D00127 |
| Non-interactive | hsa:10935 | D00187 |
| Non-interactive | hsa:10935 | D00902 |
| Non-interactive | hsa:10935 | D02173 |
| Non-interactive | hsa:10935 | D02194 |
| Non-interactive | hsa:10941 | D00142 |
| Non-interactive | hsa:10941 | D00620 |
| Non-interactive | hsa:10941 | D00947 |
| Non-interactive | hsa:10941 | D02655 |
| Non-interactive | hsa:109   | D00188 |
| Non-interactive | hsa:109   | D00437 |
| Non-interactive | hsa:109   | D00805 |
| Non-interactive | hsa:109   | D01370 |
| Non-interactive | hsa:109   | D02115 |
| Non-interactive | hsa:109   | D02731 |
| Non-interactive | hsa:109   | D03899 |
| Non-interactive | hsa:10    | D01180 |
| Non-interactive | hsa:10    | D01367 |
| Non-interactive | hsa:10    | D01844 |
| Non-interactive | hsa:10    | D02173 |

|                 |           |        |
|-----------------|-----------|--------|
| Non-interactive | hsa:10    | D03643 |
| Non-interactive | hsa:11072 | D00120 |
| Non-interactive | hsa:11072 | D00252 |
| Non-interactive | hsa:11072 | D00519 |
| Non-interactive | hsa:11072 | D00658 |
| Non-interactive | hsa:11072 | D02375 |
| Non-interactive | hsa:11072 | D02756 |
| Non-interactive | hsa:11072 | D03798 |
| Non-interactive | hsa:111   | D00125 |
| Non-interactive | hsa:111   | D00187 |
| Non-interactive | hsa:111   | D01441 |
| Non-interactive | hsa:111   | D02333 |
| Non-interactive | hsa:111   | D03798 |
| Non-interactive | hsa:11202 | D00315 |
| Non-interactive | hsa:11202 | D00515 |
| Non-interactive | hsa:11202 | D00653 |
| Non-interactive | hsa:11202 | D02418 |
| Non-interactive | hsa:11221 | D00208 |
| Non-interactive | hsa:11221 | D00519 |
| Non-interactive | hsa:11221 | D02110 |
| Non-interactive | hsa:11221 | D03716 |
| Non-interactive | hsa:11238 | D00107 |
| Non-interactive | hsa:11238 | D00283 |
| Non-interactive | hsa:11238 | D01027 |
| Non-interactive | hsa:11266 | D00516 |
| Non-interactive | hsa:11266 | D02328 |
| Non-interactive | hsa:11266 | D03710 |
| Non-interactive | hsa:112   | D00141 |
| Non-interactive | hsa:112   | D00884 |
| Non-interactive | hsa:112   | D04029 |
| Non-interactive | hsa:112   | D04031 |
| Non-interactive | hsa:11330 | D00225 |
| Non-interactive | hsa:11343 | D00218 |
| Non-interactive | hsa:11343 | D00813 |
| Non-interactive | hsa:11343 | D00965 |
| Non-interactive | hsa:11343 | D01064 |
| Non-interactive | hsa:11343 | D03778 |
| Non-interactive | hsa:113   | D00285 |
| Non-interactive | hsa:113   | D00294 |
| Non-interactive | hsa:113   | D00325 |
| Non-interactive | hsa:113   | D00655 |
| Non-interactive | hsa:113   | D01211 |

|                 |            |        |
|-----------------|------------|--------|
| Non-interactive | hsa:113    | D01973 |
| Non-interactive | hsa:1147   | D00196 |
| Non-interactive | hsa:1147   | D00423 |
| Non-interactive | hsa:1147   | D00892 |
| Non-interactive | hsa:1147   | D01276 |
| Non-interactive | hsa:1147   | D01432 |
| Non-interactive | hsa:1147   | D02229 |
| Non-interactive | hsa:1147   | D02580 |
| Non-interactive | hsa:115    | D00120 |
| Non-interactive | hsa:115    | D03735 |
| Non-interactive | hsa:116447 | D00018 |
| Non-interactive | hsa:116447 | D01578 |
| Non-interactive | hsa:116447 | D01915 |
| Non-interactive | hsa:116447 | D02709 |
| Non-interactive | hsa:1178   | D00107 |
| Non-interactive | hsa:1178   | D00127 |
| Non-interactive | hsa:1178   | D00155 |
| Non-interactive | hsa:1178   | D00394 |
| Non-interactive | hsa:1178   | D01256 |
| Non-interactive | hsa:1200   | D00127 |
| Non-interactive | hsa:1200   | D00285 |
| Non-interactive | hsa:1200   | D00463 |
| Non-interactive | hsa:1200   | D01367 |
| Non-interactive | hsa:1200   | D02368 |
| Non-interactive | hsa:1200   | D04025 |
| Non-interactive | hsa:1215   | D00188 |
| Non-interactive | hsa:1215   | D00455 |
| Non-interactive | hsa:1215   | D00538 |
| Non-interactive | hsa:1215   | D01332 |
| Non-interactive | hsa:1215   | D02110 |
| Non-interactive | hsa:124    | D00283 |
| Non-interactive | hsa:124    | D00596 |
| Non-interactive | hsa:124    | D00885 |
| Non-interactive | hsa:124    | D01240 |
| Non-interactive | hsa:124    | D02441 |
| Non-interactive | hsa:125    | D00294 |
| Non-interactive | hsa:125    | D00455 |
| Non-interactive | hsa:125    | D00537 |
| Non-interactive | hsa:1267   | D00218 |
| Non-interactive | hsa:1267   | D00892 |
| Non-interactive | hsa:1267   | D00969 |
| Non-interactive | hsa:126    | D00142 |

|                 |            |        |
|-----------------|------------|--------|
| Non-interactive | hsa:126    | D00885 |
| Non-interactive | hsa:126    | D01332 |
| Non-interactive | hsa:126    | D02168 |
| Non-interactive | hsa:126    | D03828 |
| Non-interactive | hsa:128853 | D00148 |
| Non-interactive | hsa:128853 | D00771 |
| Non-interactive | hsa:128853 | D01907 |
| Non-interactive | hsa:128    | D00094 |
| Non-interactive | hsa:128    | D00969 |
| Non-interactive | hsa:128    | D03728 |
| Non-interactive | hsa:129807 | D00142 |
| Non-interactive | hsa:129807 | D01119 |
| Non-interactive | hsa:130399 | D00005 |
| Non-interactive | hsa:130399 | D00530 |
| Non-interactive | hsa:130399 | D00651 |
| Non-interactive | hsa:130399 | D00658 |
| Non-interactive | hsa:130399 | D01240 |
| Non-interactive | hsa:130399 | D01256 |
| Non-interactive | hsa:130399 | D04025 |
| Non-interactive | hsa:1312   | D01582 |
| Non-interactive | hsa:1312   | D04029 |
| Non-interactive | hsa:131    | D03716 |
| Non-interactive | hsa:132160 | D00070 |
| Non-interactive | hsa:132160 | D00315 |
| Non-interactive | hsa:132160 | D03218 |
| Non-interactive | hsa:132    | D00107 |
| Non-interactive | hsa:132    | D00414 |
| Non-interactive | hsa:132    | D00887 |
| Non-interactive | hsa:132    | D01275 |
| Non-interactive | hsa:132    | D03741 |
| Non-interactive | hsa:133121 | D00125 |
| Non-interactive | hsa:134510 | D00423 |
| Non-interactive | hsa:134510 | D00753 |
| Non-interactive | hsa:134510 | D03805 |
| Non-interactive | hsa:1360   | D00203 |
| Non-interactive | hsa:1360   | D00414 |
| Non-interactive | hsa:1360   | D00423 |
| Non-interactive | hsa:1360   | D00563 |
| Non-interactive | hsa:1360   | D00887 |
| Non-interactive | hsa:1360   | D01690 |
| Non-interactive | hsa:1360   | D02110 |
| Non-interactive | hsa:1360   | D03816 |

|                 |            |        |
|-----------------|------------|--------|
| Non-interactive | hsa:1363   | D00142 |
| Non-interactive | hsa:1363   | D00885 |
| Non-interactive | hsa:1363   | D00947 |
| Non-interactive | hsa:1363   | D02168 |
| Non-interactive | hsa:1363   | D02487 |
| Non-interactive | hsa:1363   | D03738 |
| Non-interactive | hsa:1374   | D00900 |
| Non-interactive | hsa:1374   | D01211 |
| Non-interactive | hsa:1376   | D00530 |
| Non-interactive | hsa:1376   | D01441 |
| Non-interactive | hsa:1376   | D02756 |
| Non-interactive | hsa:1376   | D03712 |
| Non-interactive | hsa:1384   | D00364 |
| Non-interactive | hsa:1384   | D01918 |
| Non-interactive | hsa:1384   | D03736 |
| Non-interactive | hsa:1384   | D03798 |
| Non-interactive | hsa:13     | D00805 |
| Non-interactive | hsa:13     | D01718 |
| Non-interactive | hsa:13     | D01765 |
| Non-interactive | hsa:13     | D02214 |
| Non-interactive | hsa:13     | D02368 |
| Non-interactive | hsa:13     | D03350 |
| Non-interactive | hsa:142679 | D00094 |
| Non-interactive | hsa:142679 | D00622 |
| Non-interactive | hsa:142679 | D00752 |
| Non-interactive | hsa:142679 | D01240 |
| Non-interactive | hsa:142679 | D01690 |
| Non-interactive | hsa:142679 | D01977 |
| Non-interactive | hsa:142679 | D03720 |
| Non-interactive | hsa:1429   | D00364 |
| Non-interactive | hsa:1429   | D00398 |
| Non-interactive | hsa:1429   | D02375 |
| Non-interactive | hsa:1431   | D00218 |
| Non-interactive | hsa:1431   | D00325 |
| Non-interactive | hsa:1431   | D01133 |
| Non-interactive | hsa:1431   | D01974 |
| Non-interactive | hsa:1431   | D02194 |
| Non-interactive | hsa:1431   | D02368 |
| Non-interactive | hsa:1432   | D00203 |
| Non-interactive | hsa:1432   | D00359 |
| Non-interactive | hsa:1432   | D00387 |
| Non-interactive | hsa:1432   | D00414 |



|                 |            |        |
|-----------------|------------|--------|
| Non-interactive | hsa:1432   | D00781 |
| Non-interactive | hsa:1436   | D00963 |
| Non-interactive | hsa:1436   | D02655 |
| Non-interactive | hsa:1445   | D00142 |
| Non-interactive | hsa:1445   | D00216 |
| Non-interactive | hsa:1445   | D00658 |
| Non-interactive | hsa:1445   | D00805 |
| Non-interactive | hsa:1445   | D00887 |
| Non-interactive | hsa:1445   | D01256 |
| Non-interactive | hsa:1445   | D02333 |
| Non-interactive | hsa:1445   | D02375 |
| Non-interactive | hsa:1445   | D03767 |
| Non-interactive | hsa:1445   | D03806 |
| Non-interactive | hsa:150290 | D00655 |
| Non-interactive | hsa:1504   | D00328 |
| Non-interactive | hsa:1504   | D00448 |
| Non-interactive | hsa:1504   | D00533 |
| Non-interactive | hsa:1504   | D01866 |
| Non-interactive | hsa:1504   | D03689 |
| Non-interactive | hsa:151531 | D00218 |
| Non-interactive | hsa:151531 | D00650 |
| Non-interactive | hsa:151531 | D01196 |
| Non-interactive | hsa:151531 | D02671 |
| Non-interactive | hsa:151531 | D03710 |
| Non-interactive | hsa:1537   | D00225 |
| Non-interactive | hsa:1537   | D00650 |
| Non-interactive | hsa:1537   | D01918 |
| Non-interactive | hsa:1537   | D02214 |
| Non-interactive | hsa:1543   | D00148 |
| Non-interactive | hsa:1543   | D00188 |
| Non-interactive | hsa:1543   | D00315 |
| Non-interactive | hsa:1543   | D01885 |
| Non-interactive | hsa:1543   | D03816 |
| Non-interactive | hsa:1544   | D00448 |
| Non-interactive | hsa:1544   | D00519 |
| Non-interactive | hsa:1544   | D01133 |
| Non-interactive | hsa:1544   | D02328 |
| Non-interactive | hsa:1544   | D02756 |
| Non-interactive | hsa:1544   | D03805 |
| Non-interactive | hsa:1545   | D00538 |
| Non-interactive | hsa:1545   | D00550 |
| Non-interactive | hsa:1545   | D02333 |

|                 |          |        |
|-----------------|----------|--------|
| Non-interactive | hsa:1545 | D02556 |
| Non-interactive | hsa:1545 | D02709 |
| Non-interactive | hsa:1545 | D04292 |
| Non-interactive | hsa:1548 | D00196 |
| Non-interactive | hsa:1548 | D00325 |
| Non-interactive | hsa:1548 | D00650 |
| Non-interactive | hsa:1548 | D01061 |
| Non-interactive | hsa:1548 | D02173 |
| Non-interactive | hsa:1549 | D00252 |
| Non-interactive | hsa:1549 | D00516 |
| Non-interactive | hsa:1549 | D02368 |
| Non-interactive | hsa:1549 | D03440 |
| Non-interactive | hsa:1549 | D03716 |
| Non-interactive | hsa:1551 | D00188 |
| Non-interactive | hsa:1551 | D00198 |
| Non-interactive | hsa:1551 | D01275 |
| Non-interactive | hsa:1551 | D01718 |
| Non-interactive | hsa:1551 | D01977 |
| Non-interactive | hsa:1553 | D00315 |
| Non-interactive | hsa:1553 | D00963 |
| Non-interactive | hsa:1553 | D00965 |
| Non-interactive | hsa:1553 | D01275 |
| Non-interactive | hsa:1553 | D01974 |
| Non-interactive | hsa:1553 | D03826 |
| Non-interactive | hsa:1555 | D00218 |
| Non-interactive | hsa:1555 | D00651 |
| Non-interactive | hsa:1555 | D01180 |
| Non-interactive | hsa:1555 | D01240 |
| Non-interactive | hsa:1555 | D01907 |
| Non-interactive | hsa:1555 | D02769 |
| Non-interactive | hsa:1557 | D02168 |
| Non-interactive | hsa:1558 | D00893 |
| Non-interactive | hsa:1558 | D00969 |
| Non-interactive | hsa:1558 | D01397 |
| Non-interactive | hsa:1558 | D01432 |
| Non-interactive | hsa:1558 | D03716 |
| Non-interactive | hsa:1559 | D03743 |
| Non-interactive | hsa:1562 | D00070 |
| Non-interactive | hsa:1562 | D00654 |
| Non-interactive | hsa:1562 | D00813 |
| Non-interactive | hsa:1562 | D00965 |
| Non-interactive | hsa:1562 | D01211 |

|                 |          |        |
|-----------------|----------|--------|
| Non-interactive | hsa:1565 | D00188 |
| Non-interactive | hsa:1565 | D00653 |
| Non-interactive | hsa:1565 | D01690 |
| Non-interactive | hsa:1565 | D01918 |
| Non-interactive | hsa:1571 | D00387 |
| Non-interactive | hsa:1571 | D00753 |
| Non-interactive | hsa:1571 | D01918 |
| Non-interactive | hsa:1571 | D02042 |
| Non-interactive | hsa:1572 | D00892 |
| Non-interactive | hsa:1572 | D01119 |
| Non-interactive | hsa:1572 | D01767 |
| Non-interactive | hsa:1572 | D01844 |
| Non-interactive | hsa:1572 | D03735 |
| Non-interactive | hsa:1573 | D00070 |
| Non-interactive | hsa:1573 | D00359 |
| Non-interactive | hsa:1573 | D01332 |
| Non-interactive | hsa:1573 | D01918 |
| Non-interactive | hsa:1573 | D03775 |
| Non-interactive | hsa:1576 | D00324 |
| Non-interactive | hsa:1576 | D00620 |
| Non-interactive | hsa:1576 | D01688 |
| Non-interactive | hsa:1576 | D02487 |
| Non-interactive | hsa:1577 | D00650 |
| Non-interactive | hsa:1577 | D00884 |
| Non-interactive | hsa:1577 | D01866 |
| Non-interactive | hsa:1577 | D01907 |
| Non-interactive | hsa:1577 | D03643 |
| Non-interactive | hsa:1579 | D00315 |
| Non-interactive | hsa:1579 | D03350 |
| Non-interactive | hsa:1580 | D00530 |
| Non-interactive | hsa:1580 | D00651 |
| Non-interactive | hsa:1580 | D00965 |
| Non-interactive | hsa:1580 | D01061 |
| Non-interactive | hsa:1580 | D03765 |
| Non-interactive | hsa:1581 | D00455 |
| Non-interactive | hsa:1581 | D00463 |
| Non-interactive | hsa:1581 | D01180 |
| Non-interactive | hsa:1582 | D00018 |
| Non-interactive | hsa:1582 | D00294 |
| Non-interactive | hsa:1582 | D00364 |
| Non-interactive | hsa:1582 | D00752 |
| Non-interactive | hsa:1582 | D03805 |

|                 |          |        |
|-----------------|----------|--------|
| Non-interactive | hsa:1583 | D00454 |
| Non-interactive | hsa:1583 | D00538 |
| Non-interactive | hsa:1583 | D01973 |
| Non-interactive | hsa:1583 | D03743 |
| Non-interactive | hsa:1584 | D00563 |
| Non-interactive | hsa:1585 | D00620 |
| Non-interactive | hsa:1585 | D00658 |
| Non-interactive | hsa:1585 | D03712 |
| Non-interactive | hsa:1586 | D00328 |
| Non-interactive | hsa:1586 | D00752 |
| Non-interactive | hsa:1586 | D00805 |
| Non-interactive | hsa:1586 | D03778 |
| Non-interactive | hsa:1586 | D04025 |
| Non-interactive | hsa:1588 | D00533 |
| Non-interactive | hsa:1588 | D00620 |
| Non-interactive | hsa:1588 | D03751 |
| Non-interactive | hsa:1588 | D03767 |
| Non-interactive | hsa:1589 | D00198 |
| Non-interactive | hsa:1589 | D00537 |
| Non-interactive | hsa:1589 | D01578 |
| Non-interactive | hsa:1589 | D01911 |
| Non-interactive | hsa:1589 | D02655 |
| Non-interactive | hsa:1593 | D00148 |
| Non-interactive | hsa:1593 | D01918 |
| Non-interactive | hsa:1593 | D03218 |
| Non-interactive | hsa:1593 | D03728 |
| Non-interactive | hsa:1594 | D00196 |
| Non-interactive | hsa:1594 | D00622 |
| Non-interactive | hsa:1594 | D00781 |
| Non-interactive | hsa:1594 | D00813 |
| Non-interactive | hsa:1594 | D01119 |
| Non-interactive | hsa:1595 | D00285 |
| Non-interactive | hsa:1595 | D01223 |
| Non-interactive | hsa:1610 | D00283 |
| Non-interactive | hsa:1610 | D00324 |
| Non-interactive | hsa:1610 | D00359 |
| Non-interactive | hsa:1610 | D02173 |
| Non-interactive | hsa:1610 | D02580 |
| Non-interactive | hsa:1621 | D00488 |
| Non-interactive | hsa:1621 | D00623 |
| Non-interactive | hsa:1621 | D02115 |
| Non-interactive | hsa:1621 | D03720 |

|                 |          |        |
|-----------------|----------|--------|
| Non-interactive | hsa:1621 | D03728 |
| Non-interactive | hsa:1633 | D00298 |
| Non-interactive | hsa:1633 | D00596 |
| Non-interactive | hsa:1633 | D01367 |
| Non-interactive | hsa:1636 | D00002 |
| Non-interactive | hsa:1636 | D00656 |
| Non-interactive | hsa:1636 | D02451 |
| Non-interactive | hsa:1636 | D04029 |
| Non-interactive | hsa:1645 | D00141 |
| Non-interactive | hsa:1645 | D00653 |
| Non-interactive | hsa:1645 | D00893 |
| Non-interactive | hsa:1645 | D01862 |
| Non-interactive | hsa:1675 | D00054 |
| Non-interactive | hsa:1675 | D01180 |
| Non-interactive | hsa:1675 | D03803 |
| Non-interactive | hsa:1675 | D04024 |
| Non-interactive | hsa:1719 | D00550 |
| Non-interactive | hsa:1719 | D01332 |
| Non-interactive | hsa:1719 | D03710 |
| Non-interactive | hsa:1719 | D03712 |
| Non-interactive | hsa:1723 | D00398 |
| Non-interactive | hsa:1723 | D00805 |
| Non-interactive | hsa:1723 | D01071 |
| Non-interactive | hsa:1723 | D01164 |
| Non-interactive | hsa:1723 | D01196 |
| Non-interactive | hsa:1723 | D01397 |
| Non-interactive | hsa:1723 | D03828 |
| Non-interactive | hsa:1725 | D00449 |
| Non-interactive | hsa:1725 | D00947 |
| Non-interactive | hsa:1725 | D01275 |
| Non-interactive | hsa:1725 | D01915 |
| Non-interactive | hsa:1725 | D02110 |
| Non-interactive | hsa:1728 | D00563 |
| Non-interactive | hsa:1728 | D03807 |
| Non-interactive | hsa:1728 | D03826 |
| Non-interactive | hsa:1800 | D00423 |
| Non-interactive | hsa:1800 | D00733 |
| Non-interactive | hsa:1800 | D01196 |
| Non-interactive | hsa:1803 | D00623 |
| Non-interactive | hsa:1803 | D01432 |
| Non-interactive | hsa:1806 | D00094 |
| Non-interactive | hsa:1806 | D01256 |

|                 |          |        |
|-----------------|----------|--------|
| Non-interactive | hsa:1806 | D02194 |
| Non-interactive | hsa:1806 | D02671 |
| Non-interactive | hsa:1843 | D00198 |
| Non-interactive | hsa:1843 | D01275 |
| Non-interactive | hsa:1843 | D01984 |
| Non-interactive | hsa:1843 | D02110 |
| Non-interactive | hsa:1843 | D02655 |
| Non-interactive | hsa:1843 | D03077 |
| Non-interactive | hsa:1844 | D00155 |
| Non-interactive | hsa:1844 | D00359 |
| Non-interactive | hsa:1844 | D00620 |
| Non-interactive | hsa:1844 | D01432 |
| Non-interactive | hsa:1845 | D00656 |
| Non-interactive | hsa:1846 | D00018 |
| Non-interactive | hsa:1846 | D00902 |
| Non-interactive | hsa:1846 | D02214 |
| Non-interactive | hsa:1846 | D02581 |
| Non-interactive | hsa:1846 | D03758 |
| Non-interactive | hsa:1847 | D01911 |
| Non-interactive | hsa:1848 | D00653 |
| Non-interactive | hsa:1848 | D03077 |
| Non-interactive | hsa:1849 | D00218 |
| Non-interactive | hsa:1849 | D02328 |
| Non-interactive | hsa:1849 | D02731 |
| Non-interactive | hsa:1850 | D00120 |
| Non-interactive | hsa:1850 | D00131 |
| Non-interactive | hsa:1850 | D00752 |
| Non-interactive | hsa:1850 | D00889 |
| Non-interactive | hsa:1850 | D01180 |
| Non-interactive | hsa:1850 | D01397 |
| Non-interactive | hsa:1850 | D02193 |
| Non-interactive | hsa:1850 | D02451 |
| Non-interactive | hsa:1852 | D01765 |
| Non-interactive | hsa:1852 | D02368 |
| Non-interactive | hsa:1852 | D03758 |
| Non-interactive | hsa:1890 | D00120 |
| Non-interactive | hsa:1890 | D00141 |
| Non-interactive | hsa:1890 | D00155 |
| Non-interactive | hsa:1890 | D00218 |
| Non-interactive | hsa:1890 | D02110 |
| Non-interactive | hsa:189  | D00593 |
| Non-interactive | hsa:189  | D00889 |

|                 |            |        |
|-----------------|------------|--------|
| Non-interactive | hsa:189    | D01164 |
| Non-interactive | hsa:189    | D01578 |
| Non-interactive | hsa:189    | D02229 |
| Non-interactive | hsa:189    | D02258 |
| Non-interactive | hsa:189    | D03758 |
| Non-interactive | hsa:18     | D00002 |
| Non-interactive | hsa:18     | D00294 |
| Non-interactive | hsa:18     | D00455 |
| Non-interactive | hsa:18     | D01441 |
| Non-interactive | hsa:18     | D02418 |
| Non-interactive | hsa:191    | D00142 |
| Non-interactive | hsa:191    | D00293 |
| Non-interactive | hsa:191    | D00294 |
| Non-interactive | hsa:191    | D00434 |
| Non-interactive | hsa:1956   | D00188 |
| Non-interactive | hsa:1956   | D00359 |
| Non-interactive | hsa:1956   | D01240 |
| Non-interactive | hsa:1956   | D01915 |
| Non-interactive | hsa:196883 | D00120 |
| Non-interactive | hsa:196883 | D02418 |
| Non-interactive | hsa:196883 | D02709 |
| Non-interactive | hsa:1969   | D00813 |
| Non-interactive | hsa:1969   | D01211 |
| Non-interactive | hsa:1969   | D02115 |
| Non-interactive | hsa:1990   | D03882 |
| Non-interactive | hsa:1991   | D00252 |
| Non-interactive | hsa:1991   | D01180 |
| Non-interactive | hsa:1991   | D04029 |
| Non-interactive | hsa:199974 | D00448 |
| Non-interactive | hsa:199974 | D00965 |
| Non-interactive | hsa:199974 | D03767 |
| Non-interactive | hsa:199974 | D03775 |
| Non-interactive | hsa:2041   | D00141 |
| Non-interactive | hsa:2041   | D00198 |
| Non-interactive | hsa:2041   | D00454 |
| Non-interactive | hsa:2041   | D00752 |
| Non-interactive | hsa:2041   | D01027 |
| Non-interactive | hsa:2041   | D01064 |
| Non-interactive | hsa:2042   | D00203 |
| Non-interactive | hsa:2042   | D00623 |
| Non-interactive | hsa:2042   | D00752 |
| Non-interactive | hsa:2042   | D00813 |

|                 |          |        |
|-----------------|----------|--------|
| Non-interactive | hsa:2042 | D01718 |
| Non-interactive | hsa:2043 | D00533 |
| Non-interactive | hsa:2043 | D00538 |
| Non-interactive | hsa:2043 | D01027 |
| Non-interactive | hsa:2043 | D02368 |
| Non-interactive | hsa:2043 | D03758 |
| Non-interactive | hsa:2043 | D03805 |
| Non-interactive | hsa:2044 | D01061 |
| Non-interactive | hsa:2044 | D01211 |
| Non-interactive | hsa:2044 | D03735 |
| Non-interactive | hsa:2045 | D00283 |
| Non-interactive | hsa:2045 | D00652 |
| Non-interactive | hsa:2045 | D02115 |
| Non-interactive | hsa:2045 | D02580 |
| Non-interactive | hsa:2045 | D03440 |
| Non-interactive | hsa:2045 | D03882 |
| Non-interactive | hsa:2046 | D00394 |
| Non-interactive | hsa:2046 | D01432 |
| Non-interactive | hsa:2046 | D01862 |
| Non-interactive | hsa:2046 | D02655 |
| Non-interactive | hsa:2047 | D00448 |
| Non-interactive | hsa:2047 | D02731 |
| Non-interactive | hsa:2048 | D00120 |
| Non-interactive | hsa:2048 | D00752 |
| Non-interactive | hsa:2048 | D02042 |
| Non-interactive | hsa:2048 | D02229 |
| Non-interactive | hsa:2048 | D03012 |
| Non-interactive | hsa:2048 | D03741 |
| Non-interactive | hsa:2049 | D00455 |
| Non-interactive | hsa:2049 | D00463 |
| Non-interactive | hsa:2049 | D02368 |
| Non-interactive | hsa:2049 | D02487 |
| Non-interactive | hsa:2049 | D03765 |
| Non-interactive | hsa:2049 | D03788 |
| Non-interactive | hsa:2050 | D00142 |
| Non-interactive | hsa:2050 | D01367 |
| Non-interactive | hsa:2050 | D01432 |
| Non-interactive | hsa:2050 | D03717 |
| Non-interactive | hsa:2050 | D03735 |
| Non-interactive | hsa:2051 | D02560 |
| Non-interactive | hsa:2051 | D02581 |
| Non-interactive | hsa:2058 | D00398 |



|                 |          |        |
|-----------------|----------|--------|
| Non-interactive | hsa:2058 | D00813 |
| Non-interactive | hsa:2058 | D01119 |
| Non-interactive | hsa:2058 | D01180 |
| Non-interactive | hsa:2058 | D01842 |
| Non-interactive | hsa:2058 | D02556 |
| Non-interactive | hsa:2058 | D03767 |
| Non-interactive | hsa:2064 | D00437 |
| Non-interactive | hsa:2065 | D00002 |
| Non-interactive | hsa:2065 | D00187 |
| Non-interactive | hsa:2065 | D01133 |
| Non-interactive | hsa:2065 | D02110 |
| Non-interactive | hsa:2065 | D02581 |
| Non-interactive | hsa:2065 | D03077 |
| Non-interactive | hsa:2066 | D00359 |
| Non-interactive | hsa:2066 | D00463 |
| Non-interactive | hsa:2098 | D00188 |
| Non-interactive | hsa:2098 | D00463 |
| Non-interactive | hsa:2098 | D03689 |
| Non-interactive | hsa:2135 | D01973 |
| Non-interactive | hsa:2147 | D00620 |
| Non-interactive | hsa:2147 | D02769 |
| Non-interactive | hsa:2147 | D03350 |
| Non-interactive | hsa:2147 | D03758 |
| Non-interactive | hsa:2147 | D03767 |
| Non-interactive | hsa:2155 | D00387 |
| Non-interactive | hsa:2155 | D00623 |
| Non-interactive | hsa:2155 | D00753 |
| Non-interactive | hsa:2155 | D02560 |
| Non-interactive | hsa:2158 | D01164 |
| Non-interactive | hsa:2158 | D01973 |
| Non-interactive | hsa:2159 | D00094 |
| Non-interactive | hsa:2159 | D01915 |
| Non-interactive | hsa:2159 | D03712 |
| Non-interactive | hsa:2159 | D03736 |
| Non-interactive | hsa:2160 | D00463 |
| Non-interactive | hsa:2160 | D03775 |
| Non-interactive | hsa:2161 | D00216 |
| Non-interactive | hsa:2161 | D00387 |
| Non-interactive | hsa:2161 | D01842 |
| Non-interactive | hsa:2161 | D01984 |
| Non-interactive | hsa:216  | D00120 |
| Non-interactive | hsa:216  | D02731 |

|                 |          |        |
|-----------------|----------|--------|
| Non-interactive | hsa:216  | D03775 |
| Non-interactive | hsa:217  | D00387 |
| Non-interactive | hsa:217  | D00434 |
| Non-interactive | hsa:217  | D01211 |
| Non-interactive | hsa:217  | D01866 |
| Non-interactive | hsa:2180 | D00414 |
| Non-interactive | hsa:2180 | D00892 |
| Non-interactive | hsa:2180 | D01061 |
| Non-interactive | hsa:2180 | D01844 |
| Non-interactive | hsa:2180 | D01918 |
| Non-interactive | hsa:2185 | D00752 |
| Non-interactive | hsa:2185 | D02328 |
| Non-interactive | hsa:2185 | D03689 |
| Non-interactive | hsa:2185 | D03720 |
| Non-interactive | hsa:2185 | D03728 |
| Non-interactive | hsa:218  | D00216 |
| Non-interactive | hsa:218  | D00423 |
| Non-interactive | hsa:218  | D02756 |
| Non-interactive | hsa:218  | D03716 |
| Non-interactive | hsa:218  | D03765 |
| Non-interactive | hsa:2193 | D00537 |
| Non-interactive | hsa:2193 | D01164 |
| Non-interactive | hsa:2193 | D01240 |
| Non-interactive | hsa:2193 | D02375 |
| Non-interactive | hsa:219  | D00139 |
| Non-interactive | hsa:219  | D00567 |
| Non-interactive | hsa:219  | D00658 |
| Non-interactive | hsa:219  | D00885 |
| Non-interactive | hsa:219  | D00969 |
| Non-interactive | hsa:219  | D01690 |
| Non-interactive | hsa:219  | D01866 |
| Non-interactive | hsa:219  | D02194 |
| Non-interactive | hsa:219  | D02709 |
| Non-interactive | hsa:219  | D03350 |
| Non-interactive | hsa:219  | D03775 |
| Non-interactive | hsa:2224 | D00515 |
| Non-interactive | hsa:2224 | D03077 |
| Non-interactive | hsa:2232 | D00781 |
| Non-interactive | hsa:2232 | D01264 |
| Non-interactive | hsa:2232 | D01885 |
| Non-interactive | hsa:2235 | D00488 |
| Non-interactive | hsa:2235 | D00813 |

|                 |            |        |
|-----------------|------------|--------|
| Non-interactive | hsa:2235   | D04029 |
| Non-interactive | hsa:223    | D00651 |
| Non-interactive | hsa:223    | D00965 |
| Non-interactive | hsa:223    | D03736 |
| Non-interactive | hsa:2241   | D00387 |
| Non-interactive | hsa:2241   | D03012 |
| Non-interactive | hsa:2241   | D03350 |
| Non-interactive | hsa:2242   | D00252 |
| Non-interactive | hsa:2242   | D00394 |
| Non-interactive | hsa:2242   | D01196 |
| Non-interactive | hsa:2242   | D02556 |
| Non-interactive | hsa:2242   | D03788 |
| Non-interactive | hsa:224    | D00252 |
| Non-interactive | hsa:224    | D03758 |
| Non-interactive | hsa:225689 | D00285 |
| Non-interactive | hsa:225689 | D00650 |
| Non-interactive | hsa:225689 | D01256 |
| Non-interactive | hsa:225689 | D01842 |
| Non-interactive | hsa:2260   | D00325 |
| Non-interactive | hsa:2260   | D00753 |
| Non-interactive | hsa:2260   | D00900 |
| Non-interactive | hsa:2260   | D01397 |
| Non-interactive | hsa:2260   | D02580 |
| Non-interactive | hsa:2261   | D00203 |
| Non-interactive | hsa:2261   | D02193 |
| Non-interactive | hsa:2261   | D02229 |
| Non-interactive | hsa:2261   | D02769 |
| Non-interactive | hsa:2261   | D03775 |
| Non-interactive | hsa:2263   | D00283 |
| Non-interactive | hsa:2263   | D00398 |
| Non-interactive | hsa:2263   | D02115 |
| Non-interactive | hsa:2264   | D00139 |
| Non-interactive | hsa:2264   | D00225 |
| Non-interactive | hsa:2264   | D01918 |
| Non-interactive | hsa:2264   | D01984 |
| Non-interactive | hsa:2264   | D03712 |
| Non-interactive | hsa:2280   | D01885 |
| Non-interactive | hsa:22843  | D00018 |
| Non-interactive | hsa:22843  | D03218 |
| Non-interactive | hsa:22843  | D03440 |
| Non-interactive | hsa:22954  | D00141 |
| Non-interactive | hsa:22954  | D00449 |

|                 |           |        |
|-----------------|-----------|--------|
| Non-interactive | hsa:22954 | D01164 |
| Non-interactive | hsa:22954 | D01196 |
| Non-interactive | hsa:22954 | D01240 |
| Non-interactive | hsa:22954 | D02368 |
| Non-interactive | hsa:22954 | D02756 |
| Non-interactive | hsa:22978 | D00187 |
| Non-interactive | hsa:22978 | D00196 |
| Non-interactive | hsa:22978 | D00218 |
| Non-interactive | hsa:22978 | D00622 |
| Non-interactive | hsa:22978 | D00655 |
| Non-interactive | hsa:22978 | D01119 |
| Non-interactive | hsa:22978 | D01367 |
| Non-interactive | hsa:22978 | D03689 |
| Non-interactive | hsa:22978 | D03798 |
| Non-interactive | hsa:22978 | D03828 |
| Non-interactive | hsa:23035 | D00515 |
| Non-interactive | hsa:23035 | D02008 |
| Non-interactive | hsa:231   | D01918 |
| Non-interactive | hsa:231   | D02166 |
| Non-interactive | hsa:231   | D04029 |
| Non-interactive | hsa:2321  | D00094 |
| Non-interactive | hsa:2321  | D00893 |
| Non-interactive | hsa:2321  | D02166 |
| Non-interactive | hsa:2322  | D00893 |
| Non-interactive | hsa:2322  | D01180 |
| Non-interactive | hsa:2322  | D01767 |
| Non-interactive | hsa:23236 | D00596 |
| Non-interactive | hsa:23236 | D01370 |
| Non-interactive | hsa:23236 | D01582 |
| Non-interactive | hsa:23236 | D01974 |
| Non-interactive | hsa:23236 | D02193 |
| Non-interactive | hsa:23236 | D03712 |
| Non-interactive | hsa:23239 | D00658 |
| Non-interactive | hsa:23239 | D01973 |
| Non-interactive | hsa:23239 | D02487 |
| Non-interactive | hsa:2324  | D00120 |
| Non-interactive | hsa:2324  | D00889 |
| Non-interactive | hsa:2324  | D01715 |
| Non-interactive | hsa:2328  | D00463 |
| Non-interactive | hsa:2328  | D00658 |
| Non-interactive | hsa:2328  | D00805 |
| Non-interactive | hsa:2328  | D02418 |

|                 |           |        |
|-----------------|-----------|--------|
| Non-interactive | hsa:2328  | D03882 |
| Non-interactive | hsa:2339  | D00623 |
| Non-interactive | hsa:2339  | D00947 |
| Non-interactive | hsa:2339  | D02194 |
| Non-interactive | hsa:2339  | D02698 |
| Non-interactive | hsa:2342  | D02333 |
| Non-interactive | hsa:2342  | D03767 |
| Non-interactive | hsa:23430 | D00969 |
| Non-interactive | hsa:23430 | D03736 |
| Non-interactive | hsa:23430 | D04292 |
| Non-interactive | hsa:23436 | D00070 |
| Non-interactive | hsa:23436 | D00142 |
| Non-interactive | hsa:23436 | D00148 |
| Non-interactive | hsa:23436 | D00294 |
| Non-interactive | hsa:23436 | D00654 |
| Non-interactive | hsa:23436 | D00902 |
| Non-interactive | hsa:23436 | D01164 |
| Non-interactive | hsa:23436 | D03751 |
| Non-interactive | hsa:23475 | D00139 |
| Non-interactive | hsa:23475 | D00620 |
| Non-interactive | hsa:23475 | D03767 |
| Non-interactive | hsa:23475 | D03882 |
| Non-interactive | hsa:2356  | D01915 |
| Non-interactive | hsa:2356  | D01974 |
| Non-interactive | hsa:23632 | D00398 |
| Non-interactive | hsa:23632 | D00455 |
| Non-interactive | hsa:23632 | D00651 |
| Non-interactive | hsa:23632 | D01264 |
| Non-interactive | hsa:23632 | D01578 |
| Non-interactive | hsa:23632 | D03736 |
| Non-interactive | hsa:23632 | D04029 |
| Non-interactive | hsa:238   | D00658 |
| Non-interactive | hsa:238   | D02214 |
| Non-interactive | hsa:239   | D00005 |
| Non-interactive | hsa:239   | D00298 |
| Non-interactive | hsa:239   | D00893 |
| Non-interactive | hsa:239   | D01223 |
| Non-interactive | hsa:239   | D01578 |
| Non-interactive | hsa:239   | D02328 |
| Non-interactive | hsa:240   | D00650 |
| Non-interactive | hsa:240   | D00656 |
| Non-interactive | hsa:240   | D03218 |

|                 |           |        |
|-----------------|-----------|--------|
| Non-interactive | hsa:240   | D03440 |
| Non-interactive | hsa:240   | D03710 |
| Non-interactive | hsa:242   | D00127 |
| Non-interactive | hsa:242   | D00216 |
| Non-interactive | hsa:242   | D00434 |
| Non-interactive | hsa:242   | D00651 |
| Non-interactive | hsa:242   | D02008 |
| Non-interactive | hsa:246   | D00187 |
| Non-interactive | hsa:246   | D00325 |
| Non-interactive | hsa:247   | D00094 |
| Non-interactive | hsa:247   | D00208 |
| Non-interactive | hsa:247   | D00537 |
| Non-interactive | hsa:247   | D00753 |
| Non-interactive | hsa:247   | D01264 |
| Non-interactive | hsa:247   | D01885 |
| Non-interactive | hsa:2534  | D00900 |
| Non-interactive | hsa:2534  | D03689 |
| Non-interactive | hsa:2534  | D03826 |
| Non-interactive | hsa:2548  | D00002 |
| Non-interactive | hsa:2548  | D00391 |
| Non-interactive | hsa:2548  | D00885 |
| Non-interactive | hsa:2548  | D02193 |
| Non-interactive | hsa:2548  | D02556 |
| Non-interactive | hsa:25796 | D03350 |
| Non-interactive | hsa:25796 | D03734 |
| Non-interactive | hsa:25796 | D03778 |
| Non-interactive | hsa:25824 | D00005 |
| Non-interactive | hsa:25824 | D00596 |
| Non-interactive | hsa:25824 | D00805 |
| Non-interactive | hsa:25824 | D00969 |
| Non-interactive | hsa:25824 | D02258 |
| Non-interactive | hsa:25824 | D03720 |
| Non-interactive | hsa:2582  | D00005 |
| Non-interactive | hsa:2582  | D00125 |
| Non-interactive | hsa:2582  | D00900 |
| Non-interactive | hsa:2582  | D01264 |
| Non-interactive | hsa:2582  | D03798 |
| Non-interactive | hsa:2595  | D00463 |
| Non-interactive | hsa:2595  | D00654 |
| Non-interactive | hsa:2595  | D00965 |
| Non-interactive | hsa:2595  | D03440 |
| Non-interactive | hsa:2595  | D03689 |

|                 |            |        |
|-----------------|------------|--------|
| Non-interactive | hsa:2595   | D03828 |
| Non-interactive | hsa:2597   | D00359 |
| Non-interactive | hsa:2597   | D01061 |
| Non-interactive | hsa:2597   | D02581 |
| Non-interactive | hsa:2597   | D03788 |
| Non-interactive | hsa:25     | D00434 |
| Non-interactive | hsa:25     | D02258 |
| Non-interactive | hsa:25     | D02375 |
| Non-interactive | hsa:25     | D04031 |
| Non-interactive | hsa:260293 | D00155 |
| Non-interactive | hsa:260293 | D01765 |
| Non-interactive | hsa:26279  | D00655 |
| Non-interactive | hsa:26279  | D01180 |
| Non-interactive | hsa:26279  | D01196 |
| Non-interactive | hsa:26279  | D01264 |
| Non-interactive | hsa:26279  | D01828 |
| Non-interactive | hsa:26279  | D03218 |
| Non-interactive | hsa:26279  | D03734 |
| Non-interactive | hsa:2638   | D00216 |
| Non-interactive | hsa:2638   | D03826 |
| Non-interactive | hsa:2639   | D00127 |
| Non-interactive | hsa:2639   | D00892 |
| Non-interactive | hsa:2639   | D02671 |
| Non-interactive | hsa:2673   | D00813 |
| Non-interactive | hsa:2673   | D02731 |
| Non-interactive | hsa:2677   | D00359 |
| Non-interactive | hsa:2677   | D03710 |
| Non-interactive | hsa:27032  | D02042 |
| Non-interactive | hsa:27034  | D00437 |
| Non-interactive | hsa:27034  | D00533 |
| Non-interactive | hsa:27034  | D01844 |
| Non-interactive | hsa:27034  | D01866 |
| Non-interactive | hsa:27034  | D02731 |
| Non-interactive | hsa:27034  | D03735 |
| Non-interactive | hsa:27034  | D03882 |
| Non-interactive | hsa:270    | D00391 |
| Non-interactive | hsa:270    | D01211 |
| Non-interactive | hsa:270    | D02229 |
| Non-interactive | hsa:2746   | D00364 |
| Non-interactive | hsa:2746   | D00516 |
| Non-interactive | hsa:2746   | D00530 |
| Non-interactive | hsa:2746   | D00651 |

|                 |            |        |
|-----------------|------------|--------|
| Non-interactive | hsa:2746   | D01885 |
| Non-interactive | hsa:2746   | D01915 |
| Non-interactive | hsa:2746   | D03735 |
| Non-interactive | hsa:2766   | D00651 |
| Non-interactive | hsa:2766   | D00947 |
| Non-interactive | hsa:2766   | D01276 |
| Non-interactive | hsa:2766   | D01974 |
| Non-interactive | hsa:2766   | D02008 |
| Non-interactive | hsa:279    | D00771 |
| Non-interactive | hsa:279    | D00805 |
| Non-interactive | hsa:279    | D00889 |
| Non-interactive | hsa:279    | D02110 |
| Non-interactive | hsa:279    | D02580 |
| Non-interactive | hsa:2806   | D00398 |
| Non-interactive | hsa:2806   | D01911 |
| Non-interactive | hsa:2806   | D02110 |
| Non-interactive | hsa:28227  | D00328 |
| Non-interactive | hsa:28227  | D01264 |
| Non-interactive | hsa:2822   | D00328 |
| Non-interactive | hsa:2822   | D00364 |
| Non-interactive | hsa:2822   | D00550 |
| Non-interactive | hsa:2822   | D00593 |
| Non-interactive | hsa:2822   | D00650 |
| Non-interactive | hsa:2822   | D00947 |
| Non-interactive | hsa:2822   | D00963 |
| Non-interactive | hsa:2822   | D01432 |
| Non-interactive | hsa:2822   | D01582 |
| Non-interactive | hsa:2822   | D01984 |
| Non-interactive | hsa:284541 | D00315 |
| Non-interactive | hsa:284541 | D00753 |
| Non-interactive | hsa:284541 | D01825 |
| Non-interactive | hsa:284541 | D01828 |
| Non-interactive | hsa:284541 | D03798 |
| Non-interactive | hsa:285220 | D00596 |
| Non-interactive | hsa:285220 | D00752 |
| Non-interactive | hsa:285220 | D01582 |
| Non-interactive | hsa:285220 | D01866 |
| Non-interactive | hsa:2880   | D00188 |
| Non-interactive | hsa:2880   | D00771 |
| Non-interactive | hsa:2880   | D01765 |
| Non-interactive | hsa:2882   | D01196 |
| Non-interactive | hsa:2882   | D01565 |



|                 |           |        |
|-----------------|-----------|--------|
| Non-interactive | hsa:2882  | D01915 |
| Non-interactive | hsa:2882  | D03077 |
| Non-interactive | hsa:28972 | D00658 |
| Non-interactive | hsa:28972 | D02008 |
| Non-interactive | hsa:28972 | D03735 |
| Non-interactive | hsa:28972 | D03899 |
| Non-interactive | hsa:28    | D00005 |
| Non-interactive | hsa:28    | D00414 |
| Non-interactive | hsa:28    | D00423 |
| Non-interactive | hsa:28    | D00893 |
| Non-interactive | hsa:28    | D00963 |
| Non-interactive | hsa:28    | D01064 |
| Non-interactive | hsa:2936  | D00622 |
| Non-interactive | hsa:2936  | D01578 |
| Non-interactive | hsa:2936  | D01690 |
| Non-interactive | hsa:2950  | D00519 |
| Non-interactive | hsa:2950  | D03741 |
| Non-interactive | hsa:2950  | D03778 |
| Non-interactive | hsa:29785 | D00892 |
| Non-interactive | hsa:29785 | D01275 |
| Non-interactive | hsa:29785 | D02193 |
| Non-interactive | hsa:29785 | D02655 |
| Non-interactive | hsa:29785 | D03712 |
| Non-interactive | hsa:29941 | D00733 |
| Non-interactive | hsa:29941 | D00969 |
| Non-interactive | hsa:29968 | D00252 |
| Non-interactive | hsa:3002  | D01164 |
| Non-interactive | hsa:3002  | D02580 |
| Non-interactive | hsa:3002  | D02709 |
| Non-interactive | hsa:3002  | D03803 |
| Non-interactive | hsa:3028  | D03775 |
| Non-interactive | hsa:3033  | D00216 |
| Non-interactive | hsa:3033  | D00753 |
| Non-interactive | hsa:3033  | D03716 |
| Non-interactive | hsa:3034  | D00216 |
| Non-interactive | hsa:3034  | D00294 |
| Non-interactive | hsa:3034  | D00752 |
| Non-interactive | hsa:3034  | D01275 |
| Non-interactive | hsa:3034  | D03712 |
| Non-interactive | hsa:3035  | D00533 |
| Non-interactive | hsa:3035  | D00902 |
| Non-interactive | hsa:3035  | D01578 |

|                 |            |        |
|-----------------|------------|--------|
| Non-interactive | hsa:3055   | D00188 |
| Non-interactive | hsa:3055   | D00394 |
| Non-interactive | hsa:3055   | D00563 |
| Non-interactive | hsa:3055   | D01885 |
| Non-interactive | hsa:3055   | D02580 |
| Non-interactive | hsa:3067   | D00537 |
| Non-interactive | hsa:3067   | D00538 |
| Non-interactive | hsa:3067   | D01973 |
| Non-interactive | hsa:306    | D00142 |
| Non-interactive | hsa:306    | D00434 |
| Non-interactive | hsa:306    | D00533 |
| Non-interactive | hsa:306    | D03736 |
| Non-interactive | hsa:306    | D03778 |
| Non-interactive | hsa:306    | D03828 |
| Non-interactive | hsa:30814  | D00414 |
| Non-interactive | hsa:30814  | D00969 |
| Non-interactive | hsa:30833  | D01332 |
| Non-interactive | hsa:30     | D00094 |
| Non-interactive | hsa:30     | D00434 |
| Non-interactive | hsa:30     | D01064 |
| Non-interactive | hsa:30     | D01133 |
| Non-interactive | hsa:30     | D01765 |
| Non-interactive | hsa:30     | D01915 |
| Non-interactive | hsa:313    | D00125 |
| Non-interactive | hsa:313    | D00364 |
| Non-interactive | hsa:313    | D01370 |
| Non-interactive | hsa:313    | D01688 |
| Non-interactive | hsa:313    | D01715 |
| Non-interactive | hsa:313    | D01974 |
| Non-interactive | hsa:313    | D02441 |
| Non-interactive | hsa:3141   | D00018 |
| Non-interactive | hsa:3141   | D00196 |
| Non-interactive | hsa:3141   | D00252 |
| Non-interactive | hsa:3141   | D01180 |
| Non-interactive | hsa:3141   | D03012 |
| Non-interactive | hsa:3141   | D03643 |
| Non-interactive | hsa:3156   | D00813 |
| Non-interactive | hsa:3156   | D03751 |
| Non-interactive | hsa:31     | D00125 |
| Non-interactive | hsa:31     | D01842 |
| Non-interactive | hsa:326625 | D00414 |
| Non-interactive | hsa:326625 | D00771 |

|                 |            |        |
|-----------------|------------|--------|
| Non-interactive | hsa:326625 | D00885 |
| Non-interactive | hsa:326625 | D01164 |
| Non-interactive | hsa:326625 | D01688 |
| Non-interactive | hsa:326625 | D02194 |
| Non-interactive | hsa:326625 | D03728 |
| Non-interactive | hsa:327    | D00139 |
| Non-interactive | hsa:327    | D00884 |
| Non-interactive | hsa:327    | D01844 |
| Non-interactive | hsa:327    | D02487 |
| Non-interactive | hsa:3283   | D01715 |
| Non-interactive | hsa:3283   | D03077 |
| Non-interactive | hsa:3283   | D03798 |
| Non-interactive | hsa:3290   | D02214 |
| Non-interactive | hsa:3290   | D02556 |
| Non-interactive | hsa:3290   | D04029 |
| Non-interactive | hsa:3291   | D00515 |
| Non-interactive | hsa:3291   | D00752 |
| Non-interactive | hsa:3291   | D00969 |
| Non-interactive | hsa:3291   | D01565 |
| Non-interactive | hsa:3292   | D00515 |
| Non-interactive | hsa:3292   | D00538 |
| Non-interactive | hsa:3292   | D01397 |
| Non-interactive | hsa:3292   | D03728 |
| Non-interactive | hsa:3292   | D03806 |
| Non-interactive | hsa:3295   | D00387 |
| Non-interactive | hsa:3295   | D01061 |
| Non-interactive | hsa:3295   | D01211 |
| Non-interactive | hsa:3295   | D01565 |
| Non-interactive | hsa:3295   | D02581 |
| Non-interactive | hsa:32     | D00658 |
| Non-interactive | hsa:32     | D01862 |
| Non-interactive | hsa:32     | D01866 |
| Non-interactive | hsa:32     | D02008 |
| Non-interactive | hsa:32     | D02769 |
| Non-interactive | hsa:32     | D03767 |
| Non-interactive | hsa:3376   | D00449 |
| Non-interactive | hsa:3376   | D00947 |
| Non-interactive | hsa:3376   | D01862 |
| Non-interactive | hsa:3376   | D02709 |
| Non-interactive | hsa:3376   | D03806 |
| Non-interactive | hsa:339221 | D01061 |
| Non-interactive | hsa:339221 | D01275 |

|                 |            |        |
|-----------------|------------|--------|
| Non-interactive | hsa:339221 | D01862 |
| Non-interactive | hsa:339221 | D03720 |
| Non-interactive | hsa:3416   | D00965 |
| Non-interactive | hsa:3416   | D02698 |
| Non-interactive | hsa:3480   | D00437 |
| Non-interactive | hsa:3480   | D01885 |
| Non-interactive | hsa:3480   | D02008 |
| Non-interactive | hsa:3480   | D03735 |
| Non-interactive | hsa:3480   | D03823 |
| Non-interactive | hsa:349565 | D00131 |
| Non-interactive | hsa:349565 | D00188 |
| Non-interactive | hsa:349565 | D00781 |
| Non-interactive | hsa:34     | D01718 |
| Non-interactive | hsa:34     | D02328 |
| Non-interactive | hsa:34     | D03767 |
| Non-interactive | hsa:353    | D00155 |
| Non-interactive | hsa:353    | D00656 |
| Non-interactive | hsa:353    | D00753 |
| Non-interactive | hsa:353    | D01915 |
| Non-interactive | hsa:354    | D00070 |
| Non-interactive | hsa:354    | D00454 |
| Non-interactive | hsa:354    | D01119 |
| Non-interactive | hsa:354    | D01332 |
| Non-interactive | hsa:3551   | D01582 |
| Non-interactive | hsa:3551   | D01918 |
| Non-interactive | hsa:3551   | D02560 |
| Non-interactive | hsa:35     | D00218 |
| Non-interactive | hsa:35     | D00434 |
| Non-interactive | hsa:35     | D01223 |
| Non-interactive | hsa:35     | D01907 |
| Non-interactive | hsa:3612   | D00622 |
| Non-interactive | hsa:3612   | D02375 |
| Non-interactive | hsa:3614   | D00503 |
| Non-interactive | hsa:3614   | D00579 |
| Non-interactive | hsa:3615   | D00620 |
| Non-interactive | hsa:3615   | D03743 |
| Non-interactive | hsa:3615   | D03775 |
| Non-interactive | hsa:3643   | D00449 |
| Non-interactive | hsa:3643   | D00567 |
| Non-interactive | hsa:3643   | D00969 |
| Non-interactive | hsa:3645   | D03440 |
| Non-interactive | hsa:3645   | D03689 |

|                 |            |        |
|-----------------|------------|--------|
| Non-interactive | hsa:3645   | D03823 |
| Non-interactive | hsa:36     | D00359 |
| Non-interactive | hsa:36     | D00650 |
| Non-interactive | hsa:36     | D00652 |
| Non-interactive | hsa:36     | D03012 |
| Non-interactive | hsa:36     | D03712 |
| Non-interactive | hsa:36     | D03805 |
| Non-interactive | hsa:3702   | D00142 |
| Non-interactive | hsa:3702   | D00947 |
| Non-interactive | hsa:3702   | D03778 |
| Non-interactive | hsa:3712   | D00294 |
| Non-interactive | hsa:3712   | D03738 |
| Non-interactive | hsa:3712   | D03758 |
| Non-interactive | hsa:3716   | D00488 |
| Non-interactive | hsa:3716   | D01223 |
| Non-interactive | hsa:3716   | D02168 |
| Non-interactive | hsa:3717   | D00652 |
| Non-interactive | hsa:3717   | D00752 |
| Non-interactive | hsa:3717   | D01828 |
| Non-interactive | hsa:3717   | D03826 |
| Non-interactive | hsa:3718   | D00148 |
| Non-interactive | hsa:3718   | D00391 |
| Non-interactive | hsa:3718   | D00965 |
| Non-interactive | hsa:3718   | D03720 |
| Non-interactive | hsa:3718   | D03767 |
| Non-interactive | hsa:3735   | D01767 |
| Non-interactive | hsa:3735   | D01866 |
| Non-interactive | hsa:3735   | D03798 |
| Non-interactive | hsa:377677 | D00125 |
| Non-interactive | hsa:377677 | D00285 |
| Non-interactive | hsa:377677 | D02258 |
| Non-interactive | hsa:377677 | D02671 |
| Non-interactive | hsa:3791   | D00947 |
| Non-interactive | hsa:3791   | D01844 |
| Non-interactive | hsa:3791   | D03806 |
| Non-interactive | hsa:3791   | D03826 |
| Non-interactive | hsa:3815   | D00188 |
| Non-interactive | hsa:3815   | D03738 |
| Non-interactive | hsa:3815   | D03826 |
| Non-interactive | hsa:3816   | D00887 |
| Non-interactive | hsa:3816   | D01907 |
| Non-interactive | hsa:3816   | D02418 |

|                 |            |        |
|-----------------|------------|--------|
| Non-interactive | hsa:3817   | D00155 |
| Non-interactive | hsa:3817   | D00283 |
| Non-interactive | hsa:3817   | D00340 |
| Non-interactive | hsa:3817   | D00359 |
| Non-interactive | hsa:3817   | D01180 |
| Non-interactive | hsa:3817   | D01911 |
| Non-interactive | hsa:3817   | D03710 |
| Non-interactive | hsa:3817   | D03743 |
| Non-interactive | hsa:3818   | D00387 |
| Non-interactive | hsa:3818   | D00530 |
| Non-interactive | hsa:3818   | D01977 |
| Non-interactive | hsa:3818   | D03806 |
| Non-interactive | hsa:3818   | D04031 |
| Non-interactive | hsa:38     | D01715 |
| Non-interactive | hsa:38     | D02731 |
| Non-interactive | hsa:3906   | D00120 |
| Non-interactive | hsa:3906   | D03440 |
| Non-interactive | hsa:3906   | D04024 |
| Non-interactive | hsa:390956 | D01397 |
| Non-interactive | hsa:390956 | D02168 |
| Non-interactive | hsa:390956 | D03218 |
| Non-interactive | hsa:390956 | D03735 |
| Non-interactive | hsa:3932   | D00653 |
| Non-interactive | hsa:3932   | D00656 |
| Non-interactive | hsa:3932   | D00884 |
| Non-interactive | hsa:3932   | D01765 |
| Non-interactive | hsa:3932   | D03710 |
| Non-interactive | hsa:3939   | D01918 |
| Non-interactive | hsa:3939   | D02709 |
| Non-interactive | hsa:3945   | D02418 |
| Non-interactive | hsa:3988   | D00141 |
| Non-interactive | hsa:3988   | D00394 |
| Non-interactive | hsa:3988   | D01133 |
| Non-interactive | hsa:3988   | D02166 |
| Non-interactive | hsa:3988   | D04029 |
| Non-interactive | hsa:3990   | D00070 |
| Non-interactive | hsa:3990   | D00398 |
| Non-interactive | hsa:3990   | D00947 |
| Non-interactive | hsa:3990   | D03440 |
| Non-interactive | hsa:3990   | D03735 |
| Non-interactive | hsa:3990   | D03741 |
| Non-interactive | hsa:3990   | D03751 |

|                 |          |        |
|-----------------|----------|--------|
| Non-interactive | hsa:3990 | D03765 |
| Non-interactive | hsa:3990 | D03805 |
| Non-interactive | hsa:3991 | D00315 |
| Non-interactive | hsa:3991 | D00328 |
| Non-interactive | hsa:3991 | D00437 |
| Non-interactive | hsa:3991 | D00515 |
| Non-interactive | hsa:4017 | D00252 |
| Non-interactive | hsa:4017 | D00325 |
| Non-interactive | hsa:4017 | D04029 |
| Non-interactive | hsa:4023 | D00328 |
| Non-interactive | hsa:4023 | D00463 |
| Non-interactive | hsa:4023 | D01582 |
| Non-interactive | hsa:4023 | D02166 |
| Non-interactive | hsa:4023 | D04024 |
| Non-interactive | hsa:4025 | D00107 |
| Non-interactive | hsa:4025 | D00187 |
| Non-interactive | hsa:4025 | D00203 |
| Non-interactive | hsa:4025 | D00340 |
| Non-interactive | hsa:4025 | D00449 |
| Non-interactive | hsa:4025 | D03218 |
| Non-interactive | hsa:4048 | D00753 |
| Non-interactive | hsa:4048 | D00947 |
| Non-interactive | hsa:4048 | D00969 |
| Non-interactive | hsa:4048 | D02698 |
| Non-interactive | hsa:4051 | D00018 |
| Non-interactive | hsa:4051 | D00283 |
| Non-interactive | hsa:4051 | D00298 |
| Non-interactive | hsa:4051 | D00781 |
| Non-interactive | hsa:4051 | D02194 |
| Non-interactive | hsa:4051 | D03689 |
| Non-interactive | hsa:4051 | D03823 |
| Non-interactive | hsa:4051 | D04292 |
| Non-interactive | hsa:4058 | D00315 |
| Non-interactive | hsa:4058 | D00519 |
| Non-interactive | hsa:4058 | D01844 |
| Non-interactive | hsa:4058 | D01866 |
| Non-interactive | hsa:4058 | D01907 |
| Non-interactive | hsa:4058 | D01918 |
| Non-interactive | hsa:4058 | D02451 |
| Non-interactive | hsa:4058 | D02581 |
| Non-interactive | hsa:4058 | D02756 |
| Non-interactive | hsa:4058 | D03758 |

|                 |          |        |
|-----------------|----------|--------|
| Non-interactive | hsa:4058 | D04031 |
| Non-interactive | hsa:4067 | D00208 |
| Non-interactive | hsa:4067 | D00538 |
| Non-interactive | hsa:4067 | D00630 |
| Non-interactive | hsa:4067 | D01688 |
| Non-interactive | hsa:4067 | D02671 |
| Non-interactive | hsa:4067 | D04024 |
| Non-interactive | hsa:4128 | D00208 |
| Non-interactive | hsa:4128 | D00283 |
| Non-interactive | hsa:4128 | D00434 |
| Non-interactive | hsa:4128 | D01133 |
| Non-interactive | hsa:4128 | D01240 |
| Non-interactive | hsa:4128 | D01367 |
| Non-interactive | hsa:4128 | D02168 |
| Non-interactive | hsa:4129 | D03828 |
| Non-interactive | hsa:4143 | D00141 |
| Non-interactive | hsa:4143 | D01275 |
| Non-interactive | hsa:4145 | D00142 |
| Non-interactive | hsa:4145 | D00364 |
| Non-interactive | hsa:4145 | D01578 |
| Non-interactive | hsa:4145 | D02731 |
| Non-interactive | hsa:4190 | D00325 |
| Non-interactive | hsa:4190 | D00364 |
| Non-interactive | hsa:4190 | D01565 |
| Non-interactive | hsa:4190 | D01973 |
| Non-interactive | hsa:4190 | D03751 |
| Non-interactive | hsa:4191 | D00503 |
| Non-interactive | hsa:4191 | D00656 |
| Non-interactive | hsa:4191 | D01275 |
| Non-interactive | hsa:4191 | D01862 |
| Non-interactive | hsa:4191 | D02173 |
| Non-interactive | hsa:4191 | D03712 |
| Non-interactive | hsa:4191 | D03716 |
| Non-interactive | hsa:4200 | D01918 |
| Non-interactive | hsa:4200 | D02168 |
| Non-interactive | hsa:4200 | D03758 |
| Non-interactive | hsa:4233 | D00127 |
| Non-interactive | hsa:4233 | D00394 |
| Non-interactive | hsa:4233 | D00771 |
| Non-interactive | hsa:4233 | D01196 |
| Non-interactive | hsa:4233 | D01367 |
| Non-interactive | hsa:4233 | D03728 |



|                 |          |        |
|-----------------|----------|--------|
| Non-interactive | hsa:4282 | D00752 |
| Non-interactive | hsa:4282 | D02110 |
| Non-interactive | hsa:4282 | D02560 |
| Non-interactive | hsa:4311 | D00107 |
| Non-interactive | hsa:4311 | D00216 |
| Non-interactive | hsa:4311 | D00652 |
| Non-interactive | hsa:4311 | D02173 |
| Non-interactive | hsa:4329 | D00414 |
| Non-interactive | hsa:4329 | D00781 |
| Non-interactive | hsa:4329 | D01061 |
| Non-interactive | hsa:4329 | D01825 |
| Non-interactive | hsa:4329 | D02709 |
| Non-interactive | hsa:4329 | D03689 |
| Non-interactive | hsa:4353 | D00018 |
| Non-interactive | hsa:4353 | D00423 |
| Non-interactive | hsa:4353 | D00519 |
| Non-interactive | hsa:4353 | D00947 |
| Non-interactive | hsa:4353 | D01275 |
| Non-interactive | hsa:4353 | D01688 |
| Non-interactive | hsa:4353 | D01915 |
| Non-interactive | hsa:4353 | D03806 |
| Non-interactive | hsa:4353 | D04025 |
| Non-interactive | hsa:43   | D02731 |
| Non-interactive | hsa:43   | D03736 |
| Non-interactive | hsa:444  | D00141 |
| Non-interactive | hsa:444  | D00651 |
| Non-interactive | hsa:444  | D00658 |
| Non-interactive | hsa:444  | D00805 |
| Non-interactive | hsa:444  | D00892 |
| Non-interactive | hsa:444  | D00969 |
| Non-interactive | hsa:444  | D01907 |
| Non-interactive | hsa:444  | D03077 |
| Non-interactive | hsa:4482 | D01432 |
| Non-interactive | hsa:4486 | D00203 |
| Non-interactive | hsa:4486 | D00965 |
| Non-interactive | hsa:4486 | D01918 |
| Non-interactive | hsa:4486 | D03689 |
| Non-interactive | hsa:4548 | D00414 |
| Non-interactive | hsa:4548 | D00448 |
| Non-interactive | hsa:4548 | D00515 |
| Non-interactive | hsa:4548 | D00654 |
| Non-interactive | hsa:4548 | D01974 |

|                 |          |        |
|-----------------|----------|--------|
| Non-interactive | hsa:4548 | D02110 |
| Non-interactive | hsa:4548 | D03643 |
| Non-interactive | hsa:4548 | D03751 |
| Non-interactive | hsa:4552 | D02328 |
| Non-interactive | hsa:4552 | D03350 |
| Non-interactive | hsa:4593 | D00620 |
| Non-interactive | hsa:4593 | D00892 |
| Non-interactive | hsa:4593 | D00963 |
| Non-interactive | hsa:4593 | D01196 |
| Non-interactive | hsa:4593 | D01866 |
| Non-interactive | hsa:4593 | D03899 |
| Non-interactive | hsa:4594 | D00125 |
| Non-interactive | hsa:4594 | D01441 |
| Non-interactive | hsa:4594 | D01690 |
| Non-interactive | hsa:4594 | D01825 |
| Non-interactive | hsa:4594 | D01915 |
| Non-interactive | hsa:4594 | D02451 |
| Non-interactive | hsa:4594 | D03798 |
| Non-interactive | hsa:4758 | D00463 |
| Non-interactive | hsa:4758 | D00893 |
| Non-interactive | hsa:4758 | D02115 |
| Non-interactive | hsa:4759 | D00596 |
| Non-interactive | hsa:4759 | D00889 |
| Non-interactive | hsa:4759 | D01064 |
| Non-interactive | hsa:4759 | D03803 |
| Non-interactive | hsa:4759 | D04292 |
| Non-interactive | hsa:476  | D00324 |
| Non-interactive | hsa:476  | D00328 |
| Non-interactive | hsa:476  | D01370 |
| Non-interactive | hsa:4835 | D01885 |
| Non-interactive | hsa:4835 | D03012 |
| Non-interactive | hsa:4835 | D04024 |
| Non-interactive | hsa:4837 | D00398 |
| Non-interactive | hsa:4837 | D01565 |
| Non-interactive | hsa:4837 | D02368 |
| Non-interactive | hsa:4860 | D00198 |
| Non-interactive | hsa:4860 | D00781 |
| Non-interactive | hsa:4860 | D00900 |
| Non-interactive | hsa:4860 | D01276 |
| Non-interactive | hsa:4860 | D01715 |
| Non-interactive | hsa:4881 | D00437 |
| Non-interactive | hsa:4881 | D01825 |

|                 |          |        |
|-----------------|----------|--------|
| Non-interactive | hsa:4881 | D01911 |
| Non-interactive | hsa:4881 | D01977 |
| Non-interactive | hsa:4881 | D02166 |
| Non-interactive | hsa:4881 | D02671 |
| Non-interactive | hsa:4881 | D03798 |
| Non-interactive | hsa:4907 | D00283 |
| Non-interactive | hsa:4907 | D00533 |
| Non-interactive | hsa:4907 | D00733 |
| Non-interactive | hsa:4907 | D01164 |
| Non-interactive | hsa:4907 | D01180 |
| Non-interactive | hsa:4907 | D01367 |
| Non-interactive | hsa:4907 | D02451 |
| Non-interactive | hsa:4907 | D03798 |
| Non-interactive | hsa:4914 | D00398 |
| Non-interactive | hsa:4914 | D00423 |
| Non-interactive | hsa:4914 | D00622 |
| Non-interactive | hsa:4914 | D00889 |
| Non-interactive | hsa:4914 | D03788 |
| Non-interactive | hsa:4914 | D03806 |
| Non-interactive | hsa:4915 | D00203 |
| Non-interactive | hsa:4915 | D00218 |
| Non-interactive | hsa:4915 | D00519 |
| Non-interactive | hsa:4915 | D03765 |
| Non-interactive | hsa:4915 | D03803 |
| Non-interactive | hsa:4916 | D00653 |
| Non-interactive | hsa:4916 | D01765 |
| Non-interactive | hsa:4916 | D03735 |
| Non-interactive | hsa:4919 | D00094 |
| Non-interactive | hsa:4919 | D00293 |
| Non-interactive | hsa:4919 | D00398 |
| Non-interactive | hsa:4919 | D00892 |
| Non-interactive | hsa:4919 | D03717 |
| Non-interactive | hsa:4919 | D04031 |
| Non-interactive | hsa:4920 | D00538 |
| Non-interactive | hsa:4920 | D00947 |
| Non-interactive | hsa:4920 | D01432 |
| Non-interactive | hsa:4920 | D03798 |
| Non-interactive | hsa:4921 | D00094 |
| Non-interactive | hsa:4921 | D00120 |
| Non-interactive | hsa:4921 | D00448 |
| Non-interactive | hsa:4921 | D00658 |
| Non-interactive | hsa:4921 | D02168 |

|                 |          |        |
|-----------------|----------|--------|
| Non-interactive | hsa:4921 | D03712 |
| Non-interactive | hsa:4921 | D03882 |
| Non-interactive | hsa:4942 | D00120 |
| Non-interactive | hsa:4942 | D00252 |
| Non-interactive | hsa:4942 | D00463 |
| Non-interactive | hsa:4953 | D00188 |
| Non-interactive | hsa:4953 | D00488 |
| Non-interactive | hsa:4953 | D01061 |
| Non-interactive | hsa:4953 | D01256 |
| Non-interactive | hsa:4953 | D01915 |
| Non-interactive | hsa:4953 | D03350 |
| Non-interactive | hsa:4953 | D03689 |
| Non-interactive | hsa:495  | D00196 |
| Non-interactive | hsa:495  | D00391 |
| Non-interactive | hsa:495  | D00752 |
| Non-interactive | hsa:495  | D02418 |
| Non-interactive | hsa:495  | D02655 |
| Non-interactive | hsa:495  | D02731 |
| Non-interactive | hsa:49   | D00781 |
| Non-interactive | hsa:49   | D01223 |
| Non-interactive | hsa:49   | D01397 |
| Non-interactive | hsa:49   | D01984 |
| Non-interactive | hsa:49   | D02008 |
| Non-interactive | hsa:49   | D03798 |
| Non-interactive | hsa:501  | D00563 |
| Non-interactive | hsa:501  | D01027 |
| Non-interactive | hsa:501  | D01397 |
| Non-interactive | hsa:501  | D02166 |
| Non-interactive | hsa:501  | D02368 |
| Non-interactive | hsa:5033 | D00196 |
| Non-interactive | hsa:5033 | D00620 |
| Non-interactive | hsa:5033 | D00885 |
| Non-interactive | hsa:5033 | D00887 |
| Non-interactive | hsa:5033 | D02166 |
| Non-interactive | hsa:5033 | D02214 |
| Non-interactive | hsa:5033 | D03788 |
| Non-interactive | hsa:5033 | D03899 |
| Non-interactive | hsa:5045 | D00018 |
| Non-interactive | hsa:5045 | D00448 |
| Non-interactive | hsa:5045 | D00651 |
| Non-interactive | hsa:5045 | D01441 |
| Non-interactive | hsa:5045 | D01688 |

|                 |           |        |
|-----------------|-----------|--------|
| Non-interactive | hsa:50484 | D03741 |
| Non-interactive | hsa:50487 | D02671 |
| Non-interactive | hsa:50487 | D03743 |
| Non-interactive | hsa:50487 | D03758 |
| Non-interactive | hsa:5049  | D02193 |
| Non-interactive | hsa:5049  | D02756 |
| Non-interactive | hsa:5050  | D00550 |
| Non-interactive | hsa:5050  | D00887 |
| Non-interactive | hsa:5050  | D02110 |
| Non-interactive | hsa:5050  | D03077 |
| Non-interactive | hsa:5051  | D00125 |
| Non-interactive | hsa:5051  | D00449 |
| Non-interactive | hsa:5051  | D00655 |
| Non-interactive | hsa:5052  | D00298 |
| Non-interactive | hsa:5052  | D00463 |
| Non-interactive | hsa:5052  | D00965 |
| Non-interactive | hsa:5052  | D03716 |
| Non-interactive | hsa:5052  | D04029 |
| Non-interactive | hsa:5053  | D00293 |
| Non-interactive | hsa:5053  | D02173 |
| Non-interactive | hsa:5053  | D03077 |
| Non-interactive | hsa:5091  | D00654 |
| Non-interactive | hsa:5091  | D01825 |
| Non-interactive | hsa:50940 | D00216 |
| Non-interactive | hsa:50940 | D00315 |
| Non-interactive | hsa:50940 | D00753 |
| Non-interactive | hsa:50940 | D00813 |
| Non-interactive | hsa:50940 | D01578 |
| Non-interactive | hsa:50940 | D02166 |
| Non-interactive | hsa:50940 | D02368 |
| Non-interactive | hsa:50940 | D03440 |
| Non-interactive | hsa:50940 | D04029 |
| Non-interactive | hsa:5095  | D00298 |
| Non-interactive | hsa:5095  | D02709 |
| Non-interactive | hsa:5095  | D03788 |
| Non-interactive | hsa:5096  | D00398 |
| Non-interactive | hsa:5096  | D01196 |
| Non-interactive | hsa:5096  | D01715 |
| Non-interactive | hsa:50    | D00454 |
| Non-interactive | hsa:50    | D00622 |
| Non-interactive | hsa:50    | D00884 |
| Non-interactive | hsa:50    | D01276 |

|                 |           |        |
|-----------------|-----------|--------|
| Non-interactive | hsa:50    | D02487 |
| Non-interactive | hsa:51004 | D01119 |
| Non-interactive | hsa:51004 | D02193 |
| Non-interactive | hsa:51004 | D02671 |
| Non-interactive | hsa:51004 | D03798 |
| Non-interactive | hsa:51004 | D03826 |
| Non-interactive | hsa:51095 | D00434 |
| Non-interactive | hsa:51095 | D03728 |
| Non-interactive | hsa:51166 | D00391 |
| Non-interactive | hsa:51166 | D00567 |
| Non-interactive | hsa:51166 | D01582 |
| Non-interactive | hsa:51166 | D02193 |
| Non-interactive | hsa:51172 | D03720 |
| Non-interactive | hsa:51181 | D01061 |
| Non-interactive | hsa:51181 | D03716 |
| Non-interactive | hsa:51205 | D00454 |
| Non-interactive | hsa:51205 | D00887 |
| Non-interactive | hsa:51205 | D00900 |
| Non-interactive | hsa:51205 | D01974 |
| Non-interactive | hsa:51205 | D03899 |
| Non-interactive | hsa:51207 | D00203 |
| Non-interactive | hsa:51207 | D02698 |
| Non-interactive | hsa:51207 | D03710 |
| Non-interactive | hsa:51207 | D03798 |
| Non-interactive | hsa:5122  | D00298 |
| Non-interactive | hsa:5122  | D03788 |
| Non-interactive | hsa:51251 | D00188 |
| Non-interactive | hsa:51251 | D00622 |
| Non-interactive | hsa:51251 | D03350 |
| Non-interactive | hsa:51251 | D03805 |
| Non-interactive | hsa:5126  | D00188 |
| Non-interactive | hsa:5126  | D00364 |
| Non-interactive | hsa:5126  | D00538 |
| Non-interactive | hsa:5126  | D04024 |
| Non-interactive | hsa:51292 | D00142 |
| Non-interactive | hsa:51292 | D00325 |
| Non-interactive | hsa:51292 | D00537 |
| Non-interactive | hsa:51292 | D00620 |
| Non-interactive | hsa:51292 | D01715 |
| Non-interactive | hsa:51292 | D03440 |
| Non-interactive | hsa:51302 | D00516 |
| Non-interactive | hsa:51302 | D00593 |

|                 |           |        |
|-----------------|-----------|--------|
| Non-interactive | hsa:51302 | D02487 |
| Non-interactive | hsa:51365 | D00188 |
| Non-interactive | hsa:51365 | D00294 |
| Non-interactive | hsa:51365 | D01885 |
| Non-interactive | hsa:51365 | D03440 |
| Non-interactive | hsa:51365 | D03716 |
| Non-interactive | hsa:5136  | D00002 |
| Non-interactive | hsa:5136  | D00148 |
| Non-interactive | hsa:5136  | D02173 |
| Non-interactive | hsa:5137  | D00125 |
| Non-interactive | hsa:5137  | D00188 |
| Non-interactive | hsa:5137  | D00567 |
| Non-interactive | hsa:5137  | D02258 |
| Non-interactive | hsa:5137  | D02368 |
| Non-interactive | hsa:5137  | D02769 |
| Non-interactive | hsa:5137  | D03828 |
| Non-interactive | hsa:5137  | D04024 |
| Non-interactive | hsa:5138  | D01211 |
| Non-interactive | hsa:5138  | D02115 |
| Non-interactive | hsa:5138  | D02441 |
| Non-interactive | hsa:5138  | D03765 |
| Non-interactive | hsa:513   | D00218 |
| Non-interactive | hsa:513   | D00579 |
| Non-interactive | hsa:513   | D02756 |
| Non-interactive | hsa:513   | D03716 |
| Non-interactive | hsa:513   | D03720 |
| Non-interactive | hsa:5140  | D00519 |
| Non-interactive | hsa:5141  | D03743 |
| Non-interactive | hsa:5142  | D00315 |
| Non-interactive | hsa:5142  | D00596 |
| Non-interactive | hsa:5142  | D03788 |
| Non-interactive | hsa:5143  | D00125 |
| Non-interactive | hsa:5143  | D00142 |
| Non-interactive | hsa:5143  | D00298 |
| Non-interactive | hsa:5143  | D01275 |
| Non-interactive | hsa:5143  | D02328 |
| Non-interactive | hsa:5143  | D03012 |
| Non-interactive | hsa:5143  | D03751 |
| Non-interactive | hsa:5144  | D02368 |
| Non-interactive | hsa:5144  | D02441 |
| Non-interactive | hsa:5144  | D03077 |
| Non-interactive | hsa:5144  | D03751 |

|                 |          |        |
|-----------------|----------|--------|
| Non-interactive | hsa:5144 | D03758 |
| Non-interactive | hsa:5144 | D03806 |
| Non-interactive | hsa:5144 | D03899 |
| Non-interactive | hsa:5145 | D00127 |
| Non-interactive | hsa:5145 | D01767 |
| Non-interactive | hsa:5145 | D02173 |
| Non-interactive | hsa:5145 | D02328 |
| Non-interactive | hsa:5145 | D02368 |
| Non-interactive | hsa:5145 | D03788 |
| Non-interactive | hsa:5146 | D00887 |
| Non-interactive | hsa:5146 | D02333 |
| Non-interactive | hsa:5147 | D00448 |
| Non-interactive | hsa:5147 | D00537 |
| Non-interactive | hsa:5147 | D00753 |
| Non-interactive | hsa:5147 | D01240 |
| Non-interactive | hsa:5147 | D01767 |
| Non-interactive | hsa:5147 | D02556 |
| Non-interactive | hsa:5147 | D03738 |
| Non-interactive | hsa:5147 | D03899 |
| Non-interactive | hsa:5147 | D04024 |
| Non-interactive | hsa:5148 | D00538 |
| Non-interactive | hsa:5148 | D00753 |
| Non-interactive | hsa:5148 | D01974 |
| Non-interactive | hsa:5149 | D00283 |
| Non-interactive | hsa:5149 | D00325 |
| Non-interactive | hsa:5149 | D00449 |
| Non-interactive | hsa:5149 | D01974 |
| Non-interactive | hsa:5149 | D02258 |
| Non-interactive | hsa:5149 | D03716 |
| Non-interactive | hsa:5149 | D03738 |
| Non-interactive | hsa:5150 | D00340 |
| Non-interactive | hsa:5150 | D00596 |
| Non-interactive | hsa:5150 | D01825 |
| Non-interactive | hsa:5150 | D02368 |
| Non-interactive | hsa:5151 | D01211 |
| Non-interactive | hsa:5151 | D02487 |
| Non-interactive | hsa:5151 | D03743 |
| Non-interactive | hsa:5151 | D03765 |
| Non-interactive | hsa:5151 | D03806 |
| Non-interactive | hsa:5152 | D00567 |
| Non-interactive | hsa:5152 | D01027 |
| Non-interactive | hsa:5152 | D01885 |



|                 |           |        |
|-----------------|-----------|--------|
| Non-interactive | hsa:5152  | D02769 |
| Non-interactive | hsa:5152  | D03806 |
| Non-interactive | hsa:5156  | D00394 |
| Non-interactive | hsa:5156  | D00463 |
| Non-interactive | hsa:5156  | D00533 |
| Non-interactive | hsa:5156  | D02556 |
| Non-interactive | hsa:5156  | D03734 |
| Non-interactive | hsa:5158  | D00449 |
| Non-interactive | hsa:5158  | D01240 |
| Non-interactive | hsa:5158  | D02258 |
| Non-interactive | hsa:5158  | D04031 |
| Non-interactive | hsa:5159  | D00094 |
| Non-interactive | hsa:5159  | D00188 |
| Non-interactive | hsa:5159  | D02556 |
| Non-interactive | hsa:5159  | D03643 |
| Non-interactive | hsa:51645 | D00142 |
| Non-interactive | hsa:51645 | D00203 |
| Non-interactive | hsa:51645 | D00387 |
| Non-interactive | hsa:51645 | D02115 |
| Non-interactive | hsa:5167  | D01767 |
| Non-interactive | hsa:5168  | D00120 |
| Non-interactive | hsa:5168  | D00198 |
| Non-interactive | hsa:5168  | D00283 |
| Non-interactive | hsa:5168  | D00387 |
| Non-interactive | hsa:5168  | D00437 |
| Non-interactive | hsa:5168  | D00655 |
| Non-interactive | hsa:5168  | D01825 |
| Non-interactive | hsa:5168  | D03712 |
| Non-interactive | hsa:5168  | D03778 |
| Non-interactive | hsa:5169  | D00537 |
| Non-interactive | hsa:5169  | D01432 |
| Non-interactive | hsa:5169  | D01828 |
| Non-interactive | hsa:51727 | D00340 |
| Non-interactive | hsa:51727 | D00623 |
| Non-interactive | hsa:51727 | D03012 |
| Non-interactive | hsa:51727 | D03440 |
| Non-interactive | hsa:51727 | D04292 |
| Non-interactive | hsa:51    | D00753 |
| Non-interactive | hsa:51    | D00969 |
| Non-interactive | hsa:51    | D01164 |
| Non-interactive | hsa:51    | D03738 |
| Non-interactive | hsa:5294  | D00364 |

|                 |          |        |
|-----------------|----------|--------|
| Non-interactive | hsa:5294 | D00434 |
| Non-interactive | hsa:5294 | D00805 |
| Non-interactive | hsa:5294 | D01211 |
| Non-interactive | hsa:5294 | D01276 |
| Non-interactive | hsa:5294 | D02418 |
| Non-interactive | hsa:5319 | D00364 |
| Non-interactive | hsa:5319 | D00567 |
| Non-interactive | hsa:5319 | D00771 |
| Non-interactive | hsa:5319 | D01911 |
| Non-interactive | hsa:5320 | D00654 |
| Non-interactive | hsa:5320 | D01578 |
| Non-interactive | hsa:5320 | D01866 |
| Non-interactive | hsa:5320 | D04025 |
| Non-interactive | hsa:5321 | D00900 |
| Non-interactive | hsa:5321 | D01915 |
| Non-interactive | hsa:5321 | D01984 |
| Non-interactive | hsa:5322 | D01164 |
| Non-interactive | hsa:5322 | D01397 |
| Non-interactive | hsa:5322 | D01911 |
| Non-interactive | hsa:5322 | D03077 |
| Non-interactive | hsa:5322 | D03899 |
| Non-interactive | hsa:5327 | D00538 |
| Non-interactive | hsa:5327 | D00567 |
| Non-interactive | hsa:5327 | D01842 |
| Non-interactive | hsa:5327 | D03012 |
| Non-interactive | hsa:5327 | D03728 |
| Non-interactive | hsa:5327 | D03734 |
| Non-interactive | hsa:5327 | D03775 |
| Non-interactive | hsa:5328 | D01064 |
| Non-interactive | hsa:5328 | D01844 |
| Non-interactive | hsa:5328 | D02581 |
| Non-interactive | hsa:5328 | D03012 |
| Non-interactive | hsa:5328 | D03806 |
| Non-interactive | hsa:5330 | D01715 |
| Non-interactive | hsa:5331 | D00437 |
| Non-interactive | hsa:5331 | D01432 |
| Non-interactive | hsa:5332 | D00654 |
| Non-interactive | hsa:5332 | D00884 |
| Non-interactive | hsa:5332 | D00889 |
| Non-interactive | hsa:5332 | D01974 |
| Non-interactive | hsa:5332 | D02671 |
| Non-interactive | hsa:5332 | D03803 |

|                 |           |        |
|-----------------|-----------|--------|
| Non-interactive | hsa:5333  | D00437 |
| Non-interactive | hsa:5333  | D03751 |
| Non-interactive | hsa:5335  | D00002 |
| Non-interactive | hsa:5335  | D00139 |
| Non-interactive | hsa:5335  | D00324 |
| Non-interactive | hsa:5335  | D00593 |
| Non-interactive | hsa:5335  | D00733 |
| Non-interactive | hsa:5335  | D01180 |
| Non-interactive | hsa:5335  | D02214 |
| Non-interactive | hsa:5335  | D04029 |
| Non-interactive | hsa:5336  | D01256 |
| Non-interactive | hsa:5336  | D02487 |
| Non-interactive | hsa:5336  | D03826 |
| Non-interactive | hsa:5336  | D04025 |
| Non-interactive | hsa:5337  | D00656 |
| Non-interactive | hsa:5337  | D00781 |
| Non-interactive | hsa:5337  | D01027 |
| Non-interactive | hsa:5338  | D00198 |
| Non-interactive | hsa:5338  | D01367 |
| Non-interactive | hsa:5340  | D00324 |
| Non-interactive | hsa:5340  | D00752 |
| Non-interactive | hsa:5340  | D00781 |
| Non-interactive | hsa:5340  | D01397 |
| Non-interactive | hsa:5340  | D01718 |
| Non-interactive | hsa:5340  | D03823 |
| Non-interactive | hsa:5351  | D00216 |
| Non-interactive | hsa:5351  | D00455 |
| Non-interactive | hsa:5351  | D00623 |
| Non-interactive | hsa:5351  | D00655 |
| Non-interactive | hsa:5351  | D02110 |
| Non-interactive | hsa:5351  | D02698 |
| Non-interactive | hsa:53938 | D00148 |
| Non-interactive | hsa:53938 | D00325 |
| Non-interactive | hsa:53938 | D00394 |
| Non-interactive | hsa:53938 | D00596 |
| Non-interactive | hsa:53938 | D00650 |
| Non-interactive | hsa:53938 | D03828 |
| Non-interactive | hsa:53    | D02441 |
| Non-interactive | hsa:53    | D02560 |
| Non-interactive | hsa:53    | D03741 |
| Non-interactive | hsa:53    | D03751 |
| Non-interactive | hsa:5406  | D00018 |

|                 |           |        |
|-----------------|-----------|--------|
| Non-interactive | hsa:5406  | D00285 |
| Non-interactive | hsa:5406  | D00325 |
| Non-interactive | hsa:5406  | D01582 |
| Non-interactive | hsa:5406  | D01767 |
| Non-interactive | hsa:5406  | D01907 |
| Non-interactive | hsa:5407  | D00515 |
| Non-interactive | hsa:5407  | D02581 |
| Non-interactive | hsa:5408  | D01332 |
| Non-interactive | hsa:5422  | D01061 |
| Non-interactive | hsa:5422  | D01441 |
| Non-interactive | hsa:5422  | D01977 |
| Non-interactive | hsa:5423  | D00208 |
| Non-interactive | hsa:5423  | D00771 |
| Non-interactive | hsa:5423  | D01256 |
| Non-interactive | hsa:5423  | D03716 |
| Non-interactive | hsa:5423  | D03798 |
| Non-interactive | hsa:5444  | D00488 |
| Non-interactive | hsa:5444  | D00596 |
| Non-interactive | hsa:5444  | D03798 |
| Non-interactive | hsa:5445  | D02328 |
| Non-interactive | hsa:5447  | D00002 |
| Non-interactive | hsa:5447  | D00434 |
| Non-interactive | hsa:5447  | D00652 |
| Non-interactive | hsa:5447  | D01240 |
| Non-interactive | hsa:5447  | D02375 |
| Non-interactive | hsa:5447  | D04292 |
| Non-interactive | hsa:54490 | D00141 |
| Non-interactive | hsa:54490 | D00294 |
| Non-interactive | hsa:54490 | D03734 |
| Non-interactive | hsa:54490 | D04031 |
| Non-interactive | hsa:54575 | D00455 |
| Non-interactive | hsa:54575 | D00733 |
| Non-interactive | hsa:54575 | D01275 |
| Non-interactive | hsa:54575 | D02166 |
| Non-interactive | hsa:54576 | D00391 |
| Non-interactive | hsa:54576 | D00567 |
| Non-interactive | hsa:54576 | D00652 |
| Non-interactive | hsa:54576 | D02418 |
| Non-interactive | hsa:54577 | D00225 |
| Non-interactive | hsa:54577 | D00887 |
| Non-interactive | hsa:54577 | D00889 |
| Non-interactive | hsa:54577 | D02110 |

|                 |           |        |
|-----------------|-----------|--------|
| Non-interactive | hsa:54577 | D03012 |
| Non-interactive | hsa:54578 | D00294 |
| Non-interactive | hsa:54578 | D03767 |
| Non-interactive | hsa:54578 | D04292 |
| Non-interactive | hsa:54579 | D03798 |
| Non-interactive | hsa:54579 | D03803 |
| Non-interactive | hsa:54579 | D03828 |
| Non-interactive | hsa:54600 | D00488 |
| Non-interactive | hsa:54600 | D02173 |
| Non-interactive | hsa:54657 | D01688 |
| Non-interactive | hsa:54657 | D01984 |
| Non-interactive | hsa:54657 | D02441 |
| Non-interactive | hsa:54657 | D02556 |
| Non-interactive | hsa:54657 | D02580 |
| Non-interactive | hsa:54658 | D00449 |
| Non-interactive | hsa:54659 | D00018 |
| Non-interactive | hsa:54659 | D00070 |
| Non-interactive | hsa:54659 | D00293 |
| Non-interactive | hsa:54659 | D02168 |
| Non-interactive | hsa:54659 | D02671 |
| Non-interactive | hsa:54659 | D02756 |
| Non-interactive | hsa:54677 | D00359 |
| Non-interactive | hsa:54677 | D00892 |
| Non-interactive | hsa:54677 | D00893 |
| Non-interactive | hsa:5470  | D00070 |
| Non-interactive | hsa:5470  | D00294 |
| Non-interactive | hsa:5470  | D00387 |
| Non-interactive | hsa:5470  | D03720 |
| Non-interactive | hsa:5475  | D00328 |
| Non-interactive | hsa:5475  | D00652 |
| Non-interactive | hsa:5475  | D00884 |
| Non-interactive | hsa:5475  | D01064 |
| Non-interactive | hsa:5475  | D01240 |
| Non-interactive | hsa:5475  | D03689 |
| Non-interactive | hsa:5476  | D00216 |
| Non-interactive | hsa:5476  | D00550 |
| Non-interactive | hsa:5476  | D03440 |
| Non-interactive | hsa:5478  | D00131 |
| Non-interactive | hsa:5478  | D01061 |
| Non-interactive | hsa:5479  | D00005 |
| Non-interactive | hsa:5479  | D00753 |
| Non-interactive | hsa:5479  | D00969 |

|                 |           |        |
|-----------------|-----------|--------|
| Non-interactive | hsa:5479  | D02556 |
| Non-interactive | hsa:5479  | D03077 |
| Non-interactive | hsa:5481  | D00394 |
| Non-interactive | hsa:5481  | D00550 |
| Non-interactive | hsa:5481  | D00563 |
| Non-interactive | hsa:5481  | D02110 |
| Non-interactive | hsa:5481  | D02168 |
| Non-interactive | hsa:5481  | D02368 |
| Non-interactive | hsa:5481  | D03738 |
| Non-interactive | hsa:54878 | D01765 |
| Non-interactive | hsa:54878 | D02580 |
| Non-interactive | hsa:54878 | D03643 |
| Non-interactive | hsa:54878 | D03767 |
| Non-interactive | hsa:54878 | D03775 |
| Non-interactive | hsa:5494  | D00002 |
| Non-interactive | hsa:5494  | D00094 |
| Non-interactive | hsa:5494  | D01119 |
| Non-interactive | hsa:5494  | D01825 |
| Non-interactive | hsa:5495  | D00125 |
| Non-interactive | hsa:5495  | D00203 |
| Non-interactive | hsa:5495  | D00650 |
| Non-interactive | hsa:5495  | D02451 |
| Non-interactive | hsa:5495  | D03734 |
| Non-interactive | hsa:5496  | D00538 |
| Non-interactive | hsa:5496  | D00654 |
| Non-interactive | hsa:5496  | D02333 |
| Non-interactive | hsa:5496  | D03643 |
| Non-interactive | hsa:5496  | D03798 |
| Non-interactive | hsa:5499  | D00141 |
| Non-interactive | hsa:5499  | D01180 |
| Non-interactive | hsa:5499  | D01718 |
| Non-interactive | hsa:5499  | D02166 |
| Non-interactive | hsa:54    | D02580 |
| Non-interactive | hsa:54    | D04025 |
| Non-interactive | hsa:5500  | D00394 |
| Non-interactive | hsa:5500  | D00771 |
| Non-interactive | hsa:5500  | D01688 |
| Non-interactive | hsa:5500  | D01718 |
| Non-interactive | hsa:5500  | D02560 |
| Non-interactive | hsa:5500  | D03767 |
| Non-interactive | hsa:5501  | D00127 |
| Non-interactive | hsa:5501  | D00141 |

|                 |           |        |
|-----------------|-----------|--------|
| Non-interactive | hsa:5501  | D03736 |
| Non-interactive | hsa:5501  | D03775 |
| Non-interactive | hsa:5515  | D02229 |
| Non-interactive | hsa:5515  | D03788 |
| Non-interactive | hsa:5516  | D00315 |
| Non-interactive | hsa:5516  | D02166 |
| Non-interactive | hsa:5523  | D00620 |
| Non-interactive | hsa:5523  | D00653 |
| Non-interactive | hsa:5523  | D02229 |
| Non-interactive | hsa:5523  | D03728 |
| Non-interactive | hsa:5530  | D00203 |
| Non-interactive | hsa:5530  | D00596 |
| Non-interactive | hsa:5530  | D00965 |
| Non-interactive | hsa:55312 | D00298 |
| Non-interactive | hsa:55312 | D00651 |
| Non-interactive | hsa:55312 | D02328 |
| Non-interactive | hsa:55312 | D03735 |
| Non-interactive | hsa:5531  | D00198 |
| Non-interactive | hsa:5531  | D00216 |
| Non-interactive | hsa:5531  | D00298 |
| Non-interactive | hsa:5531  | D01196 |
| Non-interactive | hsa:5531  | D02173 |
| Non-interactive | hsa:5531  | D03805 |
| Non-interactive | hsa:5532  | D00198 |
| Non-interactive | hsa:5532  | D00225 |
| Non-interactive | hsa:5532  | D00391 |
| Non-interactive | hsa:5532  | D00434 |
| Non-interactive | hsa:5532  | D00622 |
| Non-interactive | hsa:5532  | D00623 |
| Non-interactive | hsa:5532  | D02769 |
| Non-interactive | hsa:5532  | D03775 |
| Non-interactive | hsa:5533  | D00196 |
| Non-interactive | hsa:5533  | D00884 |
| Non-interactive | hsa:5533  | D01397 |
| Non-interactive | hsa:5533  | D02333 |
| Non-interactive | hsa:55359 | D00293 |
| Non-interactive | hsa:55359 | D00656 |
| Non-interactive | hsa:55359 | D00965 |
| Non-interactive | hsa:55359 | D01842 |
| Non-interactive | hsa:5536  | D00394 |
| Non-interactive | hsa:5536  | D01718 |
| Non-interactive | hsa:5537  | D00005 |

|                 |           |        |
|-----------------|-----------|--------|
| Non-interactive | hsa:5537  | D00188 |
| Non-interactive | hsa:5537  | D00328 |
| Non-interactive | hsa:5537  | D01276 |
| Non-interactive | hsa:5537  | D01842 |
| Non-interactive | hsa:5538  | D00538 |
| Non-interactive | hsa:5538  | D00969 |
| Non-interactive | hsa:5538  | D01180 |
| Non-interactive | hsa:5538  | D02487 |
| Non-interactive | hsa:5538  | D03803 |
| Non-interactive | hsa:5547  | D00283 |
| Non-interactive | hsa:5547  | D00394 |
| Non-interactive | hsa:5547  | D01977 |
| Non-interactive | hsa:5547  | D02556 |
| Non-interactive | hsa:5547  | D02655 |
| Non-interactive | hsa:5547  | D03440 |
| Non-interactive | hsa:5547  | D04024 |
| Non-interactive | hsa:5550  | D00018 |
| Non-interactive | hsa:5550  | D00437 |
| Non-interactive | hsa:5550  | D00538 |
| Non-interactive | hsa:5550  | D02193 |
| Non-interactive | hsa:55512 | D00398 |
| Non-interactive | hsa:55512 | D03738 |
| Non-interactive | hsa:5562  | D00148 |
| Non-interactive | hsa:5562  | D00530 |
| Non-interactive | hsa:5562  | D01256 |
| Non-interactive | hsa:5562  | D02487 |
| Non-interactive | hsa:55775 | D00196 |
| Non-interactive | hsa:55775 | D01915 |
| Non-interactive | hsa:55775 | D03710 |
| Non-interactive | hsa:55775 | D03823 |
| Non-interactive | hsa:55811 | D00387 |
| Non-interactive | hsa:55811 | D01240 |
| Non-interactive | hsa:55811 | D03803 |
| Non-interactive | hsa:55811 | D03805 |
| Non-interactive | hsa:558   | D03440 |
| Non-interactive | hsa:558   | D03712 |
| Non-interactive | hsa:558   | D03743 |
| Non-interactive | hsa:55902 | D00455 |
| Non-interactive | hsa:55902 | D01885 |
| Non-interactive | hsa:55902 | D02110 |
| Non-interactive | hsa:55902 | D02560 |
| Non-interactive | hsa:55902 | D03218 |



|                 |           |        |
|-----------------|-----------|--------|
| Non-interactive | hsa:55902 | D03899 |
| Non-interactive | hsa:5594  | D01256 |
| Non-interactive | hsa:5594  | D01582 |
| Non-interactive | hsa:5595  | D00733 |
| Non-interactive | hsa:5595  | D02229 |
| Non-interactive | hsa:5595  | D03728 |
| Non-interactive | hsa:5596  | D00203 |
| Non-interactive | hsa:5596  | D00364 |
| Non-interactive | hsa:5596  | D00965 |
| Non-interactive | hsa:5596  | D01240 |
| Non-interactive | hsa:5597  | D00148 |
| Non-interactive | hsa:5597  | D01275 |
| Non-interactive | hsa:5598  | D02258 |
| Non-interactive | hsa:5598  | D03738 |
| Non-interactive | hsa:5598  | D03778 |
| Non-interactive | hsa:5599  | D00294 |
| Non-interactive | hsa:5599  | D00623 |
| Non-interactive | hsa:55    | D00550 |
| Non-interactive | hsa:55    | D00892 |
| Non-interactive | hsa:55    | D01765 |
| Non-interactive | hsa:55    | D03823 |
| Non-interactive | hsa:5600  | D00364 |
| Non-interactive | hsa:5600  | D00455 |
| Non-interactive | hsa:5600  | D01582 |
| Non-interactive | hsa:5600  | D02168 |
| Non-interactive | hsa:5600  | D02441 |
| Non-interactive | hsa:5601  | D00563 |
| Non-interactive | hsa:5601  | D00902 |
| Non-interactive | hsa:5601  | D02110 |
| Non-interactive | hsa:5601  | D02229 |
| Non-interactive | hsa:5601  | D03077 |
| Non-interactive | hsa:5601  | D03712 |
| Non-interactive | hsa:5602  | D00359 |
| Non-interactive | hsa:5602  | D00652 |
| Non-interactive | hsa:5602  | D01397 |
| Non-interactive | hsa:5602  | D02368 |
| Non-interactive | hsa:5602  | D02655 |
| Non-interactive | hsa:5603  | D00455 |
| Non-interactive | hsa:5603  | D01582 |
| Non-interactive | hsa:5603  | D02655 |
| Non-interactive | hsa:5603  | D02731 |
| Non-interactive | hsa:5604  | D00293 |

|                 |          |        |
|-----------------|----------|--------|
| Non-interactive | hsa:5604 | D00394 |
| Non-interactive | hsa:5604 | D00596 |
| Non-interactive | hsa:5604 | D00947 |
| Non-interactive | hsa:5604 | D01370 |
| Non-interactive | hsa:5604 | D02580 |
| Non-interactive | hsa:5604 | D03736 |
| Non-interactive | hsa:5606 | D00656 |
| Non-interactive | hsa:5606 | D03758 |
| Non-interactive | hsa:5607 | D00454 |
| Non-interactive | hsa:5607 | D00563 |
| Non-interactive | hsa:5607 | D01918 |
| Non-interactive | hsa:5607 | D02655 |
| Non-interactive | hsa:5607 | D04029 |
| Non-interactive | hsa:5608 | D00139 |
| Non-interactive | hsa:5608 | D00423 |
| Non-interactive | hsa:5608 | D00593 |
| Non-interactive | hsa:5608 | D00781 |
| Non-interactive | hsa:5608 | D02173 |
| Non-interactive | hsa:5624 | D00131 |
| Non-interactive | hsa:5624 | D00196 |
| Non-interactive | hsa:5624 | D01715 |
| Non-interactive | hsa:5625 | D00325 |
| Non-interactive | hsa:5625 | D00454 |
| Non-interactive | hsa:5625 | D00488 |
| Non-interactive | hsa:5625 | D01133 |
| Non-interactive | hsa:5625 | D02168 |
| Non-interactive | hsa:5625 | D03806 |
| Non-interactive | hsa:5645 | D03778 |
| Non-interactive | hsa:5646 | D01064 |
| Non-interactive | hsa:5650 | D00203 |
| Non-interactive | hsa:5650 | D00448 |
| Non-interactive | hsa:5650 | D00449 |
| Non-interactive | hsa:5650 | D00455 |
| Non-interactive | hsa:5650 | D00519 |
| Non-interactive | hsa:5650 | D00733 |
| Non-interactive | hsa:5650 | D01275 |
| Non-interactive | hsa:5650 | D02368 |
| Non-interactive | hsa:5651 | D00449 |
| Non-interactive | hsa:5651 | D00516 |
| Non-interactive | hsa:5657 | D00315 |
| Non-interactive | hsa:5657 | D00593 |
| Non-interactive | hsa:5657 | D00885 |

|                 |           |        |
|-----------------|-----------|--------|
| Non-interactive | hsa:5657  | D01133 |
| Non-interactive | hsa:5657  | D01842 |
| Non-interactive | hsa:5657  | D02258 |
| Non-interactive | hsa:5657  | D03741 |
| Non-interactive | hsa:56922 | D00155 |
| Non-interactive | hsa:56922 | D00203 |
| Non-interactive | hsa:56922 | D00455 |
| Non-interactive | hsa:56922 | D00563 |
| Non-interactive | hsa:56922 | D00902 |
| Non-interactive | hsa:56922 | D01064 |
| Non-interactive | hsa:56922 | D01718 |
| Non-interactive | hsa:56922 | D02556 |
| Non-interactive | hsa:56922 | D02698 |
| Non-interactive | hsa:57016 | D00965 |
| Non-interactive | hsa:57016 | D01984 |
| Non-interactive | hsa:57016 | D03751 |
| Non-interactive | hsa:57176 | D00516 |
| Non-interactive | hsa:57176 | D00653 |
| Non-interactive | hsa:57176 | D01211 |
| Non-interactive | hsa:57176 | D02110 |
| Non-interactive | hsa:57176 | D02671 |
| Non-interactive | hsa:5740  | D00434 |
| Non-interactive | hsa:5740  | D00449 |
| Non-interactive | hsa:5740  | D03765 |
| Non-interactive | hsa:5740  | D04024 |
| Non-interactive | hsa:5740  | D04025 |
| Non-interactive | hsa:5742  | D00018 |
| Non-interactive | hsa:5742  | D00139 |
| Non-interactive | hsa:5742  | D00187 |
| Non-interactive | hsa:5742  | D01984 |
| Non-interactive | hsa:5743  | D00094 |
| Non-interactive | hsa:5743  | D00630 |
| Non-interactive | hsa:5743  | D01180 |
| Non-interactive | hsa:5743  | D04025 |
| Non-interactive | hsa:5747  | D00567 |
| Non-interactive | hsa:5747  | D02008 |
| Non-interactive | hsa:5754  | D02487 |
| Non-interactive | hsa:5754  | D02560 |
| Non-interactive | hsa:57665 | D00283 |
| Non-interactive | hsa:57665 | D00325 |
| Non-interactive | hsa:57665 | D00394 |
| Non-interactive | hsa:57665 | D00623 |

|                 |           |        |
|-----------------|-----------|--------|
| Non-interactive | hsa:57665 | D01332 |
| Non-interactive | hsa:57665 | D02560 |
| Non-interactive | hsa:57665 | D03012 |
| Non-interactive | hsa:57665 | D03765 |
| Non-interactive | hsa:58190 | D00900 |
| Non-interactive | hsa:58190 | D03751 |
| Non-interactive | hsa:5831  | D00120 |
| Non-interactive | hsa:5831  | D00298 |
| Non-interactive | hsa:5831  | D00448 |
| Non-interactive | hsa:5831  | D00455 |
| Non-interactive | hsa:5831  | D01718 |
| Non-interactive | hsa:5834  | D00208 |
| Non-interactive | hsa:5834  | D00771 |
| Non-interactive | hsa:5834  | D00900 |
| Non-interactive | hsa:5836  | D00094 |
| Non-interactive | hsa:5836  | D00550 |
| Non-interactive | hsa:5836  | D00622 |
| Non-interactive | hsa:5836  | D00813 |
| Non-interactive | hsa:5836  | D01332 |
| Non-interactive | hsa:5836  | D02194 |
| Non-interactive | hsa:5837  | D00094 |
| Non-interactive | hsa:5837  | D01027 |
| Non-interactive | hsa:5837  | D03816 |
| Non-interactive | hsa:5837  | D03828 |
| Non-interactive | hsa:5837  | D03899 |
| Non-interactive | hsa:5860  | D00294 |
| Non-interactive | hsa:5860  | D00448 |
| Non-interactive | hsa:5860  | D01582 |
| Non-interactive | hsa:5860  | D01977 |
| Non-interactive | hsa:5860  | D02214 |
| Non-interactive | hsa:5860  | D03741 |
| Non-interactive | hsa:586   | D01276 |
| Non-interactive | hsa:586   | D01973 |
| Non-interactive | hsa:586   | D04031 |
| Non-interactive | hsa:587   | D00002 |
| Non-interactive | hsa:587   | D00252 |
| Non-interactive | hsa:587   | D00294 |
| Non-interactive | hsa:587   | D00650 |
| Non-interactive | hsa:590   | D01027 |
| Non-interactive | hsa:590   | D01918 |
| Non-interactive | hsa:590   | D02671 |
| Non-interactive | hsa:590   | D03734 |

|                 |           |        |
|-----------------|-----------|--------|
| Non-interactive | hsa:5972  | D00463 |
| Non-interactive | hsa:5972  | D01915 |
| Non-interactive | hsa:5972  | D02110 |
| Non-interactive | hsa:5972  | D02166 |
| Non-interactive | hsa:5972  | D03758 |
| Non-interactive | hsa:5979  | D00198 |
| Non-interactive | hsa:5979  | D01690 |
| Non-interactive | hsa:5979  | D01974 |
| Non-interactive | hsa:5979  | D03738 |
| Non-interactive | hsa:6098  | D00216 |
| Non-interactive | hsa:6098  | D00969 |
| Non-interactive | hsa:6098  | D01061 |
| Non-interactive | hsa:6098  | D02229 |
| Non-interactive | hsa:6098  | D04029 |
| Non-interactive | hsa:613   | D00892 |
| Non-interactive | hsa:6240  | D00218 |
| Non-interactive | hsa:6240  | D01844 |
| Non-interactive | hsa:6240  | D01866 |
| Non-interactive | hsa:6240  | D01977 |
| Non-interactive | hsa:6240  | D02194 |
| Non-interactive | hsa:6241  | D00449 |
| Non-interactive | hsa:6241  | D00630 |
| Non-interactive | hsa:6241  | D00733 |
| Non-interactive | hsa:6241  | D01688 |
| Non-interactive | hsa:6241  | D01825 |
| Non-interactive | hsa:6241  | D01907 |
| Non-interactive | hsa:6241  | D01977 |
| Non-interactive | hsa:6241  | D03716 |
| Non-interactive | hsa:6259  | D03012 |
| Non-interactive | hsa:6259  | D03689 |
| Non-interactive | hsa:6300  | D01690 |
| Non-interactive | hsa:6300  | D01974 |
| Non-interactive | hsa:63036 | D00142 |
| Non-interactive | hsa:63036 | D00596 |
| Non-interactive | hsa:63036 | D01885 |
| Non-interactive | hsa:63036 | D02451 |
| Non-interactive | hsa:63036 | D02709 |
| Non-interactive | hsa:63036 | D03720 |
| Non-interactive | hsa:635   | D00394 |
| Non-interactive | hsa:635   | D01240 |
| Non-interactive | hsa:635   | D02008 |
| Non-interactive | hsa:635   | D03805 |

|                 |           |        |
|-----------------|-----------|--------|
| Non-interactive | hsa:63904 | D00622 |
| Non-interactive | hsa:64087 | D00155 |
| Non-interactive | hsa:64087 | D00188 |
| Non-interactive | hsa:64087 | D00550 |
| Non-interactive | hsa:64087 | D00655 |
| Non-interactive | hsa:64087 | D00733 |
| Non-interactive | hsa:64087 | D01061 |
| Non-interactive | hsa:64087 | D02173 |
| Non-interactive | hsa:64087 | D03218 |
| Non-interactive | hsa:64087 | D03643 |
| Non-interactive | hsa:6416  | D00294 |
| Non-interactive | hsa:6416  | D00359 |
| Non-interactive | hsa:6416  | D00488 |
| Non-interactive | hsa:6416  | D00593 |
| Non-interactive | hsa:6416  | D00900 |
| Non-interactive | hsa:6416  | D01196 |
| Non-interactive | hsa:6416  | D03689 |
| Non-interactive | hsa:6416  | D03767 |
| Non-interactive | hsa:645   | D00131 |
| Non-interactive | hsa:645   | D01973 |
| Non-interactive | hsa:645   | D03735 |
| Non-interactive | hsa:645   | D03775 |
| Non-interactive | hsa:64600 | D00018 |
| Non-interactive | hsa:64600 | D00094 |
| Non-interactive | hsa:64600 | D00142 |
| Non-interactive | hsa:64600 | D00887 |
| Non-interactive | hsa:64600 | D02115 |
| Non-interactive | hsa:64600 | D02368 |
| Non-interactive | hsa:64802 | D00887 |
| Non-interactive | hsa:64802 | D01866 |
| Non-interactive | hsa:64802 | D02581 |
| Non-interactive | hsa:64802 | D02655 |
| Non-interactive | hsa:64816 | D01718 |
| Non-interactive | hsa:64850 | D00141 |
| Non-interactive | hsa:64850 | D00198 |
| Non-interactive | hsa:64850 | D01844 |
| Non-interactive | hsa:64850 | D01907 |
| Non-interactive | hsa:64850 | D03440 |
| Non-interactive | hsa:64850 | D03689 |
| Non-interactive | hsa:64902 | D00120 |
| Non-interactive | hsa:64902 | D00325 |
| Non-interactive | hsa:64902 | D00488 |

|                 |           |        |
|-----------------|-----------|--------|
| Non-interactive | hsa:64902 | D00969 |
| Non-interactive | hsa:64902 | D01027 |
| Non-interactive | hsa:64902 | D01918 |
| Non-interactive | hsa:64902 | D02333 |
| Non-interactive | hsa:657   | D01578 |
| Non-interactive | hsa:658   | D00652 |
| Non-interactive | hsa:658   | D00658 |
| Non-interactive | hsa:658   | D03803 |
| Non-interactive | hsa:6609  | D00752 |
| Non-interactive | hsa:6609  | D01885 |
| Non-interactive | hsa:6609  | D01915 |
| Non-interactive | hsa:660   | D00359 |
| Non-interactive | hsa:660   | D00563 |
| Non-interactive | hsa:660   | D02193 |
| Non-interactive | hsa:660   | D03689 |
| Non-interactive | hsa:6610  | D01825 |
| Non-interactive | hsa:6646  | D00139 |
| Non-interactive | hsa:6646  | D00893 |
| Non-interactive | hsa:6652  | D00018 |
| Non-interactive | hsa:6652  | D00203 |
| Non-interactive | hsa:6652  | D00394 |
| Non-interactive | hsa:6652  | D00658 |
| Non-interactive | hsa:6652  | D01211 |
| Non-interactive | hsa:6652  | D01432 |
| Non-interactive | hsa:6652  | D01866 |
| Non-interactive | hsa:6652  | D01918 |
| Non-interactive | hsa:6652  | D02581 |
| Non-interactive | hsa:670   | D00148 |
| Non-interactive | hsa:670   | D01264 |
| Non-interactive | hsa:6713  | D01256 |
| Non-interactive | hsa:6713  | D02008 |
| Non-interactive | hsa:6713  | D02333 |
| Non-interactive | hsa:6713  | D03350 |
| Non-interactive | hsa:6716  | D00324 |
| Non-interactive | hsa:6716  | D03767 |
| Non-interactive | hsa:6716  | D04024 |
| Non-interactive | hsa:6725  | D01918 |
| Non-interactive | hsa:6725  | D02698 |
| Non-interactive | hsa:6725  | D03765 |
| Non-interactive | hsa:6725  | D03816 |
| Non-interactive | hsa:6725  | D03882 |
| Non-interactive | hsa:6725  | D04024 |

|                 |          |        |
|-----------------|----------|--------|
| Non-interactive | hsa:6768 | D00294 |
| Non-interactive | hsa:6768 | D00387 |
| Non-interactive | hsa:6768 | D00651 |
| Non-interactive | hsa:6768 | D00781 |
| Non-interactive | hsa:6768 | D01582 |
| Non-interactive | hsa:6768 | D01828 |
| Non-interactive | hsa:6768 | D03077 |
| Non-interactive | hsa:6768 | D03767 |
| Non-interactive | hsa:6799 | D00148 |
| Non-interactive | hsa:6799 | D00651 |
| Non-interactive | hsa:6799 | D01133 |
| Non-interactive | hsa:6799 | D02115 |
| Non-interactive | hsa:6799 | D03816 |
| Non-interactive | hsa:683  | D00884 |
| Non-interactive | hsa:683  | D01885 |
| Non-interactive | hsa:686  | D00070 |
| Non-interactive | hsa:686  | D00120 |
| Non-interactive | hsa:686  | D00148 |
| Non-interactive | hsa:686  | D00285 |
| Non-interactive | hsa:686  | D00650 |
| Non-interactive | hsa:686  | D01027 |
| Non-interactive | hsa:686  | D02008 |
| Non-interactive | hsa:686  | D03689 |
| Non-interactive | hsa:6897 | D00139 |
| Non-interactive | hsa:6897 | D00148 |
| Non-interactive | hsa:6897 | D00208 |
| Non-interactive | hsa:6897 | D00550 |
| Non-interactive | hsa:6897 | D01196 |
| Non-interactive | hsa:6897 | D02368 |
| Non-interactive | hsa:6897 | D02580 |
| Non-interactive | hsa:6898 | D00394 |
| Non-interactive | hsa:6898 | D00652 |
| Non-interactive | hsa:6898 | D00654 |
| Non-interactive | hsa:6898 | D02375 |
| Non-interactive | hsa:6898 | D03823 |
| Non-interactive | hsa:6898 | D03882 |
| Non-interactive | hsa:695  | D00650 |
| Non-interactive | hsa:695  | D00781 |
| Non-interactive | hsa:695  | D01715 |
| Non-interactive | hsa:7006 | D02333 |
| Non-interactive | hsa:7010 | D00002 |
| Non-interactive | hsa:7010 | D00293 |



|                 |          |        |
|-----------------|----------|--------|
| Non-interactive | hsa:7010 | D00753 |
| Non-interactive | hsa:7010 | D00885 |
| Non-interactive | hsa:7010 | D00902 |
| Non-interactive | hsa:7015 | D00018 |
| Non-interactive | hsa:7015 | D00107 |
| Non-interactive | hsa:7015 | D00252 |
| Non-interactive | hsa:7015 | D00423 |
| Non-interactive | hsa:7015 | D01264 |
| Non-interactive | hsa:7015 | D02655 |
| Non-interactive | hsa:7015 | D03734 |
| Non-interactive | hsa:7046 | D00094 |
| Non-interactive | hsa:7046 | D00567 |
| Non-interactive | hsa:7046 | D00884 |
| Non-interactive | hsa:7046 | D00889 |
| Non-interactive | hsa:7046 | D03803 |
| Non-interactive | hsa:7054 | D00394 |
| Non-interactive | hsa:7054 | D00434 |
| Non-interactive | hsa:7075 | D02115 |
| Non-interactive | hsa:7075 | D02173 |
| Non-interactive | hsa:7075 | D02451 |
| Non-interactive | hsa:7084 | D00125 |
| Non-interactive | hsa:7084 | D00324 |
| Non-interactive | hsa:7084 | D00463 |
| Non-interactive | hsa:7084 | D00887 |
| Non-interactive | hsa:7084 | D01915 |
| Non-interactive | hsa:7084 | D02110 |
| Non-interactive | hsa:7150 | D00107 |
| Non-interactive | hsa:7150 | D00225 |
| Non-interactive | hsa:7150 | D00653 |
| Non-interactive | hsa:7150 | D01256 |
| Non-interactive | hsa:7150 | D01828 |
| Non-interactive | hsa:7150 | D01974 |
| Non-interactive | hsa:7150 | D04292 |
| Non-interactive | hsa:7153 | D00653 |
| Non-interactive | hsa:7155 | D00963 |
| Non-interactive | hsa:7155 | D01180 |
| Non-interactive | hsa:7155 | D01842 |
| Non-interactive | hsa:7155 | D01984 |
| Non-interactive | hsa:7155 | D02581 |
| Non-interactive | hsa:7156 | D00620 |
| Non-interactive | hsa:7156 | D00884 |
| Non-interactive | hsa:7156 | D02580 |

|                 |          |        |
|-----------------|----------|--------|
| Non-interactive | hsa:7172 | D00652 |
| Non-interactive | hsa:7173 | D00963 |
| Non-interactive | hsa:7173 | D01133 |
| Non-interactive | hsa:7173 | D03798 |
| Non-interactive | hsa:7174 | D00208 |
| Non-interactive | hsa:7174 | D00394 |
| Non-interactive | hsa:7174 | D00658 |
| Non-interactive | hsa:7174 | D00885 |
| Non-interactive | hsa:7174 | D01918 |
| Non-interactive | hsa:7294 | D00188 |
| Non-interactive | hsa:7294 | D00781 |
| Non-interactive | hsa:7294 | D01180 |
| Non-interactive | hsa:7294 | D01973 |
| Non-interactive | hsa:7294 | D03218 |
| Non-interactive | hsa:7294 | D03743 |
| Non-interactive | hsa:7297 | D02333 |
| Non-interactive | hsa:7298 | D00225 |
| Non-interactive | hsa:7298 | D00434 |
| Non-interactive | hsa:7298 | D00455 |
| Non-interactive | hsa:7299 | D00325 |
| Non-interactive | hsa:7299 | D00651 |
| Non-interactive | hsa:7299 | D01825 |
| Non-interactive | hsa:7299 | D01862 |
| Non-interactive | hsa:7299 | D01885 |
| Non-interactive | hsa:7301 | D00324 |
| Non-interactive | hsa:7301 | D01223 |
| Non-interactive | hsa:7301 | D01565 |
| Non-interactive | hsa:7301 | D03643 |
| Non-interactive | hsa:7301 | D03738 |
| Non-interactive | hsa:7363 | D03218 |
| Non-interactive | hsa:7364 | D00216 |
| Non-interactive | hsa:7364 | D00889 |
| Non-interactive | hsa:7364 | D02375 |
| Non-interactive | hsa:7365 | D00120 |
| Non-interactive | hsa:7365 | D00567 |
| Non-interactive | hsa:7365 | D00884 |
| Non-interactive | hsa:7365 | D03689 |
| Non-interactive | hsa:7366 | D00630 |
| Non-interactive | hsa:7366 | D01842 |
| Non-interactive | hsa:7366 | D02368 |
| Non-interactive | hsa:7367 | D00187 |
| Non-interactive | hsa:7367 | D00563 |

|                 |          |        |
|-----------------|----------|--------|
| Non-interactive | hsa:7367 | D00733 |
| Non-interactive | hsa:7367 | D00884 |
| Non-interactive | hsa:7367 | D03788 |
| Non-interactive | hsa:7371 | D00463 |
| Non-interactive | hsa:7371 | D03350 |
| Non-interactive | hsa:7371 | D03758 |
| Non-interactive | hsa:7372 | D00107 |
| Non-interactive | hsa:7372 | D00148 |
| Non-interactive | hsa:7372 | D00423 |
| Non-interactive | hsa:7372 | D01119 |
| Non-interactive | hsa:7372 | D01718 |
| Non-interactive | hsa:7372 | D02173 |
| Non-interactive | hsa:7372 | D04024 |
| Non-interactive | hsa:7378 | D00753 |
| Non-interactive | hsa:7378 | D02258 |
| Non-interactive | hsa:7453 | D00018 |
| Non-interactive | hsa:7453 | D00120 |
| Non-interactive | hsa:7453 | D00187 |
| Non-interactive | hsa:7453 | D00969 |
| Non-interactive | hsa:7453 | D01256 |
| Non-interactive | hsa:7453 | D02258 |
| Non-interactive | hsa:7453 | D03882 |
| Non-interactive | hsa:7498 | D00107 |
| Non-interactive | hsa:7498 | D00142 |
| Non-interactive | hsa:7498 | D00324 |
| Non-interactive | hsa:7498 | D03728 |
| Non-interactive | hsa:7498 | D03743 |
| Non-interactive | hsa:7498 | D04031 |
| Non-interactive | hsa:7525 | D00293 |
| Non-interactive | hsa:7525 | D01240 |
| Non-interactive | hsa:7525 | D02194 |
| Non-interactive | hsa:7525 | D03077 |
| Non-interactive | hsa:7525 | D03218 |
| Non-interactive | hsa:7535 | D00155 |
| Non-interactive | hsa:7535 | D00298 |
| Non-interactive | hsa:7535 | D00658 |
| Non-interactive | hsa:7535 | D00887 |
| Non-interactive | hsa:7535 | D00965 |
| Non-interactive | hsa:7535 | D02581 |
| Non-interactive | hsa:759  | D00516 |
| Non-interactive | hsa:759  | D00893 |
| Non-interactive | hsa:759  | D02115 |

|                 |         |        |
|-----------------|---------|--------|
| Non-interactive | hsa:760 | D00423 |
| Non-interactive | hsa:760 | D01907 |
| Non-interactive | hsa:760 | D01977 |
| Non-interactive | hsa:760 | D02042 |
| Non-interactive | hsa:761 | D00198 |
| Non-interactive | hsa:761 | D00813 |
| Non-interactive | hsa:761 | D00889 |
| Non-interactive | hsa:761 | D00963 |
| Non-interactive | hsa:762 | D00813 |
| Non-interactive | hsa:762 | D01690 |
| Non-interactive | hsa:762 | D03823 |
| Non-interactive | hsa:762 | D04031 |
| Non-interactive | hsa:763 | D00142 |
| Non-interactive | hsa:763 | D00203 |
| Non-interactive | hsa:763 | D00298 |
| Non-interactive | hsa:763 | D02487 |
| Non-interactive | hsa:765 | D00771 |
| Non-interactive | hsa:765 | D01767 |
| Non-interactive | hsa:765 | D03826 |
| Non-interactive | hsa:766 | D00437 |
| Non-interactive | hsa:766 | D00537 |
| Non-interactive | hsa:766 | D01276 |
| Non-interactive | hsa:766 | D01718 |
| Non-interactive | hsa:766 | D03710 |
| Non-interactive | hsa:766 | D03720 |
| Non-interactive | hsa:767 | D00148 |
| Non-interactive | hsa:767 | D01332 |
| Non-interactive | hsa:767 | D02756 |
| Non-interactive | hsa:767 | D03643 |
| Non-interactive | hsa:767 | D03689 |
| Non-interactive | hsa:767 | D03806 |
| Non-interactive | hsa:768 | D01240 |
| Non-interactive | hsa:768 | D02110 |
| Non-interactive | hsa:771 | D00216 |
| Non-interactive | hsa:771 | D00455 |
| Non-interactive | hsa:771 | D00533 |
| Non-interactive | hsa:771 | D00887 |
| Non-interactive | hsa:771 | D03741 |
| Non-interactive | hsa:780 | D00434 |
| Non-interactive | hsa:780 | D00448 |
| Non-interactive | hsa:780 | D01256 |
| Non-interactive | hsa:780 | D03826 |

|                 |           |        |
|-----------------|-----------|--------|
| Non-interactive | hsa:79001 | D00125 |
| Non-interactive | hsa:79001 | D00652 |
| Non-interactive | hsa:79001 | D01133 |
| Non-interactive | hsa:79001 | D01907 |
| Non-interactive | hsa:79001 | D03643 |
| Non-interactive | hsa:7957  | D00315 |
| Non-interactive | hsa:7957  | D00519 |
| Non-interactive | hsa:7957  | D00623 |
| Non-interactive | hsa:7957  | D00753 |
| Non-interactive | hsa:7957  | D01367 |
| Non-interactive | hsa:79799 | D00285 |
| Non-interactive | hsa:79799 | D00771 |
| Non-interactive | hsa:79799 | D01180 |
| Non-interactive | hsa:79799 | D01441 |
| Non-interactive | hsa:80339 | D00359 |
| Non-interactive | hsa:80339 | D00653 |
| Non-interactive | hsa:80339 | D00658 |
| Non-interactive | hsa:80339 | D03720 |
| Non-interactive | hsa:80339 | D03816 |
| Non-interactive | hsa:80339 | D03823 |
| Non-interactive | hsa:80824 | D00454 |
| Non-interactive | hsa:80824 | D01690 |
| Non-interactive | hsa:81579 | D00893 |
| Non-interactive | hsa:81579 | D00902 |
| Non-interactive | hsa:81579 | D01866 |
| Non-interactive | hsa:81579 | D02194 |
| Non-interactive | hsa:81579 | D03775 |
| Non-interactive | hsa:8192  | D00620 |
| Non-interactive | hsa:8192  | D01223 |
| Non-interactive | hsa:8192  | D01911 |
| Non-interactive | hsa:8192  | D03735 |
| Non-interactive | hsa:8192  | D03751 |
| Non-interactive | hsa:8192  | D03823 |
| Non-interactive | hsa:8288  | D00283 |
| Non-interactive | hsa:8288  | D01027 |
| Non-interactive | hsa:8288  | D02115 |
| Non-interactive | hsa:8288  | D03751 |
| Non-interactive | hsa:834   | D00283 |
| Non-interactive | hsa:834   | D00516 |
| Non-interactive | hsa:834   | D01397 |
| Non-interactive | hsa:834   | D03828 |
| Non-interactive | hsa:8398  | D00771 |

|                 |           |        |
|-----------------|-----------|--------|
| Non-interactive | hsa:8398  | D01565 |
| Non-interactive | hsa:8398  | D01984 |
| Non-interactive | hsa:8398  | D02115 |
| Non-interactive | hsa:84152 | D00437 |
| Non-interactive | hsa:84152 | D01071 |
| Non-interactive | hsa:84152 | D02581 |
| Non-interactive | hsa:84152 | D03767 |
| Non-interactive | hsa:84152 | D03828 |
| Non-interactive | hsa:84171 | D00387 |
| Non-interactive | hsa:84171 | D02008 |
| Non-interactive | hsa:84171 | D02709 |
| Non-interactive | hsa:84171 | D03788 |
| Non-interactive | hsa:8435  | D00002 |
| Non-interactive | hsa:8435  | D00359 |
| Non-interactive | hsa:8435  | D00519 |
| Non-interactive | hsa:8435  | D00653 |
| Non-interactive | hsa:8435  | D01441 |
| Non-interactive | hsa:8435  | D02333 |
| Non-interactive | hsa:8435  | D02487 |
| Non-interactive | hsa:84532 | D00622 |
| Non-interactive | hsa:84532 | D01276 |
| Non-interactive | hsa:84532 | D01844 |
| Non-interactive | hsa:84532 | D03077 |
| Non-interactive | hsa:84618 | D00324 |
| Non-interactive | hsa:84618 | D03643 |
| Non-interactive | hsa:84618 | D03710 |
| Non-interactive | hsa:84695 | D01027 |
| Non-interactive | hsa:84695 | D01211 |
| Non-interactive | hsa:84695 | D03805 |
| Non-interactive | hsa:84706 | D00398 |
| Non-interactive | hsa:84706 | D00414 |
| Non-interactive | hsa:84706 | D00887 |
| Non-interactive | hsa:84706 | D01578 |
| Non-interactive | hsa:84706 | D01825 |
| Non-interactive | hsa:84706 | D02709 |
| Non-interactive | hsa:84706 | D03826 |
| Non-interactive | hsa:84812 | D00752 |
| Non-interactive | hsa:84812 | D01027 |
| Non-interactive | hsa:84812 | D02008 |
| Non-interactive | hsa:84812 | D02333 |
| Non-interactive | hsa:84812 | D02487 |
| Non-interactive | hsa:8513  | D00131 |

|                 |           |        |
|-----------------|-----------|--------|
| Non-interactive | hsa:8513  | D00203 |
| Non-interactive | hsa:8513  | D02110 |
| Non-interactive | hsa:8513  | D03218 |
| Non-interactive | hsa:8529  | D00094 |
| Non-interactive | hsa:8529  | D02214 |
| Non-interactive | hsa:8529  | D02333 |
| Non-interactive | hsa:8529  | D02655 |
| Non-interactive | hsa:8529  | D03077 |
| Non-interactive | hsa:8529  | D03734 |
| Non-interactive | hsa:85313 | D00293 |
| Non-interactive | hsa:85313 | D00884 |
| Non-interactive | hsa:85313 | D01119 |
| Non-interactive | hsa:85313 | D02756 |
| Non-interactive | hsa:85313 | D03440 |
| Non-interactive | hsa:8555  | D00550 |
| Non-interactive | hsa:8555  | D00889 |
| Non-interactive | hsa:8555  | D00969 |
| Non-interactive | hsa:8555  | D02560 |
| Non-interactive | hsa:8555  | D03012 |
| Non-interactive | hsa:8556  | D00650 |
| Non-interactive | hsa:8556  | D00902 |
| Non-interactive | hsa:8556  | D01119 |
| Non-interactive | hsa:8556  | D01915 |
| Non-interactive | hsa:8622  | D00519 |
| Non-interactive | hsa:8622  | D00623 |
| Non-interactive | hsa:8622  | D00652 |
| Non-interactive | hsa:8622  | D01196 |
| Non-interactive | hsa:8622  | D02368 |
| Non-interactive | hsa:8654  | D00198 |
| Non-interactive | hsa:8654  | D00885 |
| Non-interactive | hsa:8654  | D02115 |
| Non-interactive | hsa:8854  | D00947 |
| Non-interactive | hsa:8854  | D01767 |
| Non-interactive | hsa:8940  | D00005 |
| Non-interactive | hsa:8940  | D00752 |
| Non-interactive | hsa:8940  | D03828 |
| Non-interactive | hsa:8940  | D04024 |
| Non-interactive | hsa:8972  | D00125 |
| Non-interactive | hsa:8972  | D00414 |
| Non-interactive | hsa:8972  | D00947 |
| Non-interactive | hsa:8972  | D01223 |
| Non-interactive | hsa:8972  | D01765 |

|                 |           |        |
|-----------------|-----------|--------|
| Non-interactive | hsa:8972  | D03788 |
| Non-interactive | hsa:9023  | D00127 |
| Non-interactive | hsa:9023  | D00892 |
| Non-interactive | hsa:9023  | D00965 |
| Non-interactive | hsa:9023  | D03689 |
| Non-interactive | hsa:9023  | D04292 |
| Non-interactive | hsa:9088  | D00203 |
| Non-interactive | hsa:9088  | D00391 |
| Non-interactive | hsa:9088  | D00434 |
| Non-interactive | hsa:9088  | D00563 |
| Non-interactive | hsa:9088  | D00596 |
| Non-interactive | hsa:90    | D00131 |
| Non-interactive | hsa:90    | D00196 |
| Non-interactive | hsa:90    | D00593 |
| Non-interactive | hsa:90    | D01765 |
| Non-interactive | hsa:91039 | D00131 |
| Non-interactive | hsa:91039 | D01064 |
| Non-interactive | hsa:91039 | D02115 |
| Non-interactive | hsa:91039 | D02487 |
| Non-interactive | hsa:9150  | D00630 |
| Non-interactive | hsa:9150  | D01027 |
| Non-interactive | hsa:9150  | D01180 |
| Non-interactive | hsa:9150  | D01828 |
| Non-interactive | hsa:9150  | D02193 |
| Non-interactive | hsa:9150  | D02418 |
| Non-interactive | hsa:91    | D00216 |
| Non-interactive | hsa:91    | D00225 |
| Non-interactive | hsa:91    | D01397 |
| Non-interactive | hsa:91    | D01688 |
| Non-interactive | hsa:91    | D03643 |
| Non-interactive | hsa:91    | D03716 |
| Non-interactive | hsa:93650 | D00005 |
| Non-interactive | hsa:93650 | D00887 |
| Non-interactive | hsa:93650 | D01767 |
| Non-interactive | hsa:93650 | D02556 |
| Non-interactive | hsa:9388  | D00198 |
| Non-interactive | hsa:9388  | D00538 |
| Non-interactive | hsa:9388  | D00550 |
| Non-interactive | hsa:9388  | D01196 |
| Non-interactive | hsa:9388  | D03823 |
| Non-interactive | hsa:9388  | D04029 |
| Non-interactive | hsa:93    | D00018 |



|                 |           |        |
|-----------------|-----------|--------|
| Non-interactive | hsa:93    | D00125 |
| Non-interactive | hsa:93    | D00188 |
| Non-interactive | hsa:93    | D00550 |
| Non-interactive | hsa:93    | D02193 |
| Non-interactive | hsa:93    | D03218 |
| Non-interactive | hsa:94009 | D00208 |
| Non-interactive | hsa:94009 | D02655 |
| Non-interactive | hsa:94009 | D03828 |
| Non-interactive | hsa:9420  | D00455 |
| Non-interactive | hsa:9420  | D00593 |
| Non-interactive | hsa:9420  | D03741 |
| Non-interactive | hsa:9420  | D03816 |
| Non-interactive | hsa:9420  | D04292 |
| Non-interactive | hsa:94    | D00530 |
| Non-interactive | hsa:94    | D00538 |
| Non-interactive | hsa:94    | D00658 |
| Non-interactive | hsa:94    | D01276 |
| Non-interactive | hsa:94    | D01715 |
| Non-interactive | hsa:94    | D01911 |
| Non-interactive | hsa:94    | D02556 |
| Non-interactive | hsa:9563  | D00139 |
| Non-interactive | hsa:9563  | D00155 |
| Non-interactive | hsa:9563  | D03738 |
| Non-interactive | hsa:9601  | D00142 |
| Non-interactive | hsa:9601  | D00294 |
| Non-interactive | hsa:9601  | D00359 |
| Non-interactive | hsa:9601  | D00463 |
| Non-interactive | hsa:9601  | D00538 |
| Non-interactive | hsa:9601  | D03720 |
| Non-interactive | hsa:9641  | D00139 |
| Non-interactive | hsa:9641  | D00142 |
| Non-interactive | hsa:9641  | D00198 |
| Non-interactive | hsa:9641  | D00391 |
| Non-interactive | hsa:9641  | D02333 |
| Non-interactive | hsa:9641  | D02418 |
| Non-interactive | hsa:9641  | D02756 |
| Non-interactive | hsa:9647  | D00218 |
| Non-interactive | hsa:9647  | D01918 |
| Non-interactive | hsa:9647  | D02731 |
| Non-interactive | hsa:9945  | D00530 |
| Non-interactive | hsa:9945  | D01578 |
| Non-interactive | hsa:9945  | D02042 |

|                 |            |        |
|-----------------|------------|--------|
| Non-interactive | hsa:9955   | D00125 |
| Non-interactive | hsa:9955   | D00203 |
| Non-interactive | hsa:9955   | D00805 |
| Non-interactive | hsa:9955   | D01133 |
| Non-interactive | hsa:5537   | D03720 |
| Non-interactive | hsa:2135   | D02375 |
| Non-interactive | hsa:7150   | D00434 |
| Non-interactive | hsa:1728   | D01027 |
| Non-interactive | hsa:5331   | D04024 |
| Non-interactive | hsa:240    | D00187 |
| Non-interactive | hsa:51645  | D02333 |
| Non-interactive | hsa:5330   | D01164 |
| Non-interactive | hsa:3988   | D00622 |
| Non-interactive | hsa:2326   | D03689 |
| Non-interactive | hsa:5743   | D01918 |
| Non-interactive | hsa:7365   | D03823 |
| Non-interactive | hsa:51727  | D02756 |
| Non-interactive | hsa:5478   | D00884 |
| Non-interactive | hsa:79799  | D01984 |
| Non-interactive | hsa:1800   | D01828 |
| Non-interactive | hsa:2046   | D01688 |
| Non-interactive | hsa:5495   | D03712 |
| Non-interactive | hsa:5143   | D00889 |
| Non-interactive | hsa:3791   | D00198 |
| Non-interactive | hsa:1843   | D00155 |
| Non-interactive | hsa:1551   | D00653 |
| Non-interactive | hsa:6768   | D01825 |
| Non-interactive | hsa:6646   | D03643 |
| Non-interactive | hsa:4128   | D00455 |
| Non-interactive | hsa:150290 | D02328 |
| Non-interactive | hsa:5607   | D02115 |
| Non-interactive | hsa:6646   | D01370 |
| Non-interactive | hsa:5422   | D03823 |
| Non-interactive | hsa:1545   | D01862 |
| Non-interactive | hsa:5337   | D04024 |
| Non-interactive | hsa:6646   | D00533 |
| Non-interactive | hsa:586    | D03736 |
| Non-interactive | hsa:55811  | D02168 |
| Non-interactive | hsa:3643   | D00398 |
| Non-interactive | hsa:2534   | D00550 |
| Non-interactive | hsa:2066   | D00969 |
| Non-interactive | hsa:4593   | D00900 |

|                 |           |        |
|-----------------|-----------|--------|
| Non-interactive | hsa:270   | D03882 |
| Non-interactive | hsa:1360  | D00002 |
| Non-interactive | hsa:5126  | D00325 |
| Non-interactive | hsa:5600  | D03689 |
| Non-interactive | hsa:124   | D00225 |
| Non-interactive | hsa:5562  | D02328 |
| Non-interactive | hsa:10279 | D01973 |
| Non-interactive | hsa:3291  | D00216 |
| Non-interactive | hsa:9641  | D02110 |
| Non-interactive | hsa:8622  | D04029 |
| Non-interactive | hsa:1544  | D03712 |
| Non-interactive | hsa:5533  | D00437 |
| Non-interactive | hsa:613   | D00753 |
| Non-interactive | hsa:54578 | D01973 |
| Non-interactive | hsa:5515  | D04025 |
| Non-interactive | hsa:5331  | D00434 |
| Non-interactive | hsa:23436 | D00018 |
| Non-interactive | hsa:476   | D03218 |
| Non-interactive | hsa:3035  | D01973 |
| Non-interactive | hsa:191   | D02258 |
| Non-interactive | hsa:5045  | D04031 |
| Non-interactive | hsa:7372  | D00650 |
| Non-interactive | hsa:1845  | D00218 |
| Non-interactive | hsa:3645  | D03775 |
| Non-interactive | hsa:5327  | D01688 |
| Non-interactive | hsa:2746  | D00391 |
| Non-interactive | hsa:1594  | D00216 |
| Non-interactive | hsa:1543  | D00884 |
| Non-interactive | hsa:2048  | D00449 |
| Non-interactive | hsa:10295 | D03012 |
| Non-interactive | hsa:11221 | D02756 |
| Non-interactive | hsa:4486  | D00107 |
| Non-interactive | hsa:2242  | D00654 |
| Non-interactive | hsa:2044  | D00448 |
| Non-interactive | hsa:3480  | D00252 |
| Non-interactive | hsa:6646  | D00630 |
| Non-interactive | hsa:5601  | D00900 |
| Non-interactive | hsa:51365 | D01973 |
| Non-interactive | hsa:3939  | D00364 |
| Non-interactive | hsa:57176 | D02756 |
| Non-interactive | hsa:126   | D03734 |
| Non-interactive | hsa:25    | D01240 |

|                 |            |        |
|-----------------|------------|--------|
| Non-interactive | hsa:2232   | D01918 |
| Non-interactive | hsa:3002   | D03775 |
| Non-interactive | hsa:54659  | D01974 |
| Non-interactive | hsa:2766   | D00885 |
| Non-interactive | hsa:84618  | D00391 |
| Non-interactive | hsa:5050   | D00892 |
| Non-interactive | hsa:5328   | D00533 |
| Non-interactive | hsa:5406   | D00293 |
| Non-interactive | hsa:225689 | D01578 |
| Non-interactive | hsa:113    | D00340 |
| Non-interactive | hsa:11072  | D00892 |
| Non-interactive | hsa:1033   | D00652 |
| Non-interactive | hsa:2161   | D01578 |
| Non-interactive | hsa:25     | D03218 |
| Non-interactive | hsa:2066   | D02698 |
| Non-interactive | hsa:2242   | D01264 |
| Non-interactive | hsa:4921   | D03751 |
| Non-interactive | hsa:834    | D03798 |
| Non-interactive | hsa:2161   | D01765 |
| Non-interactive | hsa:134510 | D00519 |
| Non-interactive | hsa:5478   | D00120 |
| Non-interactive | hsa:1576   | D00391 |
| Non-interactive | hsa:645    | D03807 |
| Non-interactive | hsa:2047   | D02375 |
| Non-interactive | hsa:2260   | D00293 |
| Non-interactive | hsa:1806   | D00463 |
| Non-interactive | hsa:5747   | D01565 |
| Non-interactive | hsa:115    | D00125 |
| Non-interactive | hsa:2264   | D02333 |
| Non-interactive | hsa:3614   | D00139 |
| Non-interactive | hsa:54     | D00889 |
| Non-interactive | hsa:4311   | D03765 |
| Non-interactive | hsa:7378   | D01915 |
| Non-interactive | hsa:51181  | D03743 |
| Non-interactive | hsa:4920   | D00414 |
| Non-interactive | hsa:2155   | D00002 |
| Non-interactive | hsa:7957   | D03743 |
| Non-interactive | hsa:1562   | D01275 |
| Non-interactive | hsa:11221  | D01715 |
| Non-interactive | hsa:247    | D00965 |
| Non-interactive | hsa:3292   | D00969 |
| Non-interactive | hsa:6725   | D03012 |

|                 |            |        |
|-----------------|------------|--------|
| Non-interactive | hsa:5747   | D00537 |
| Non-interactive | hsa:285220 | D00963 |
| Non-interactive | hsa:9945   | D01767 |
| Non-interactive | hsa:1589   | D00127 |
| Non-interactive | hsa:2044   | D00449 |
| Non-interactive | hsa:1551   | D01866 |
| Non-interactive | hsa:26279  | D01911 |
| Non-interactive | hsa:5836   | D00141 |
| Non-interactive | hsa:51727  | D02580 |
| Non-interactive | hsa:7006   | D00516 |
| Non-interactive | hsa:131    | D03734 |
| Non-interactive | hsa:10327  | D01441 |
| Non-interactive | hsa:27032  | D01688 |
| Non-interactive | hsa:1562   | D00294 |
| Non-interactive | hsa:2046   | D00969 |
| Non-interactive | hsa:1565   | D02194 |
| Non-interactive | hsa:7006   | D00805 |
| Non-interactive | hsa:1200   | D03778 |
| Non-interactive | hsa:85313  | D01276 |
| Non-interactive | hsa:4145   | D02042 |
| Non-interactive | hsa:1621   | D00423 |
| Non-interactive | hsa:9647   | D03806 |
| Non-interactive | hsa:7153   | D01027 |
| Non-interactive | hsa:239    | D00454 |
| Non-interactive | hsa:50487  | D01915 |
| Non-interactive | hsa:7294   | D01275 |
| Non-interactive | hsa:2328   | D01211 |
| Non-interactive | hsa:2066   | D00652 |
| Non-interactive | hsa:5837   | D01973 |
| Non-interactive | hsa:6897   | D01842 |
| Non-interactive | hsa:5979   | D00885 |
| Non-interactive | hsa:5608   | D01061 |
| Non-interactive | hsa:5533   | D02756 |
| Non-interactive | hsa:4486   | D00530 |
| Non-interactive | hsa:4594   | D03716 |
| Non-interactive | hsa:57176  | D00018 |
| Non-interactive | hsa:767    | D00434 |
| Non-interactive | hsa:1728   | D03716 |
| Non-interactive | hsa:5143   | D01688 |
| Non-interactive | hsa:1033   | D00342 |
| Non-interactive | hsa:1432   | D01718 |
| Non-interactive | hsa:1675   | D02258 |

|                 |           |        |
|-----------------|-----------|--------|
| Non-interactive | hsa:5550  | D01240 |
| Non-interactive | hsa:5625  | D03743 |
| Non-interactive | hsa:1595  | D03803 |
| Non-interactive | hsa:613   | D02375 |
| Non-interactive | hsa:51172 | D00208 |
| Non-interactive | hsa:1267  | D01180 |
| Non-interactive | hsa:2548  | D00567 |
| Non-interactive | hsa:55    | D00963 |
| Non-interactive | hsa:5550  | D03717 |
| Non-interactive | hsa:4353  | D01690 |
| Non-interactive | hsa:8288  | D01825 |
| Non-interactive | hsa:11072 | D00196 |
| Non-interactive | hsa:56922 | D01973 |
| Non-interactive | hsa:10056 | D00018 |
| Non-interactive | hsa:34    | D00885 |
| Non-interactive | hsa:2746  | D04292 |
| Non-interactive | hsa:1544  | D00359 |
| Non-interactive | hsa:7083  | D00519 |
| Non-interactive | hsa:1549  | D03767 |
| Non-interactive | hsa:4837  | D01866 |
| Non-interactive | hsa:7957  | D01264 |
| Non-interactive | hsa:5601  | D00488 |
| Non-interactive | hsa:5608  | D00127 |
| Non-interactive | hsa:1553  | D00364 |
| Non-interactive | hsa:109   | D01565 |
| Non-interactive | hsa:3376  | D00654 |
| Non-interactive | hsa:50940 | D02451 |
| Non-interactive | hsa:4051  | D01718 |
| Non-interactive | hsa:5406  | D00449 |
| Non-interactive | hsa:3033  | D01276 |
| Non-interactive | hsa:10    | D00125 |
| Non-interactive | hsa:51172 | D00455 |
| Non-interactive | hsa:10    | D00293 |
| Non-interactive | hsa:54579 | D00324 |
| Non-interactive | hsa:3791  | D03710 |
| Non-interactive | hsa:2936  | D02042 |
| Non-interactive | hsa:6610  | D00094 |
| Non-interactive | hsa:5122  | D00488 |
| Non-interactive | hsa:3416  | D03798 |
| Non-interactive | hsa:5979  | D00563 |
| Non-interactive | hsa:1178  | D00593 |
| Non-interactive | hsa:5051  | D00293 |

|                 |            |        |
|-----------------|------------|--------|
| Non-interactive | hsa:5052   | D01180 |
| Non-interactive | hsa:5608   | D00094 |
| Non-interactive | hsa:2050   | D01397 |
| Non-interactive | hsa:8940   | D00414 |
| Non-interactive | hsa:5091   | D03350 |
| Non-interactive | hsa:1844   | D03716 |
| Non-interactive | hsa:3906   | D00593 |
| Non-interactive | hsa:5167   | D02671 |
| Non-interactive | hsa:64816  | D01825 |
| Non-interactive | hsa:5144   | D00813 |
| Non-interactive | hsa:4329   | D02441 |
| Non-interactive | hsa:2261   | D00893 |
| Non-interactive | hsa:3067   | D00623 |
| Non-interactive | hsa:5516   | D00127 |
| Non-interactive | hsa:54     | D00391 |
| Non-interactive | hsa:56922  | D00094 |
| Non-interactive | hsa:54576  | D03734 |
| Non-interactive | hsa:501    | D03798 |
| Non-interactive | hsa:30833  | D01133 |
| Non-interactive | hsa:5562   | D01332 |
| Non-interactive | hsa:81579  | D01565 |
| Non-interactive | hsa:1553   | D00550 |
| Non-interactive | hsa:766    | D00398 |
| Non-interactive | hsa:1847   | D00654 |
| Non-interactive | hsa:3815   | D02194 |
| Non-interactive | hsa:8555   | D01332 |
| Non-interactive | hsa:339221 | D01164 |
| Non-interactive | hsa:5476   | D00198 |
| Non-interactive | hsa:22843  | D01064 |
| Non-interactive | hsa:2321   | D02769 |
| Non-interactive | hsa:765    | D01397 |
| Non-interactive | hsa:9563   | D03710 |
| Non-interactive | hsa:1846   | D00656 |
| Non-interactive | hsa:4915   | D00969 |
| Non-interactive | hsa:246    | D03734 |
| Non-interactive | hsa:30833  | D00324 |
| Non-interactive | hsa:3290   | D01332 |
| Non-interactive | hsa:613    | D01767 |
| Non-interactive | hsa:1847   | D02441 |
| Non-interactive | hsa:761    | D00515 |
| Non-interactive | hsa:4953   | D00900 |
| Non-interactive | hsa:2058   | D01061 |

|                 |            |        |
|-----------------|------------|--------|
| Non-interactive | hsa:64902  | D02698 |
| Non-interactive | hsa:5608   | D00969 |
| Non-interactive | hsa:128853 | D01061 |
| Non-interactive | hsa:7366   | D00567 |
| Non-interactive | hsa:5136   | D01027 |
| Non-interactive | hsa:151531 | D01370 |
| Non-interactive | hsa:1991   | D02375 |
| Non-interactive | hsa:5495   | D00225 |
| Non-interactive | hsa:10327  | D00805 |
| Non-interactive | hsa:2880   | D00593 |
| Non-interactive | hsa:3033   | D03767 |
| Non-interactive | hsa:54577  | D00651 |
| Non-interactive | hsa:4548   | D03728 |
| Non-interactive | hsa:7046   | D01977 |
| Non-interactive | hsa:5603   | D00208 |
| Non-interactive | hsa:1577   | D02214 |
| Non-interactive | hsa:3988   | D02258 |
| Non-interactive | hsa:7084   | D01164 |
| Non-interactive | hsa:5136   | D00203 |
| Non-interactive | hsa:760    | D02709 |
| Non-interactive | hsa:3141   | D03899 |
| Non-interactive | hsa:2326   | D00652 |
| Non-interactive | hsa:1583   | D00653 |
| Non-interactive | hsa:834    | D00463 |
| Non-interactive | hsa:3480   | D02671 |
| Non-interactive | hsa:1572   | D00900 |
| Non-interactive | hsa:7153   | D00196 |
| Non-interactive | hsa:5595   | D01984 |
| Non-interactive | hsa:1579   | D00596 |
| Non-interactive | hsa:513    | D01582 |
| Non-interactive | hsa:5624   | D03823 |
| Non-interactive | hsa:1728   | D00434 |
| Non-interactive | hsa:81579  | D04025 |
| Non-interactive | hsa:7297   | D03689 |
| Non-interactive | hsa:2161   | D04031 |
| Non-interactive | hsa:4916   | D00414 |
| Non-interactive | hsa:10056  | D03788 |
| Non-interactive | hsa:5136   | D02756 |
| Non-interactive | hsa:5447   | D02655 |
| Non-interactive | hsa:2882   | D03882 |
| Non-interactive | hsa:5538   | D00651 |
| Non-interactive | hsa:2041   | D03805 |



|                 |            |        |
|-----------------|------------|--------|
| Non-interactive | hsa:5050   | D03012 |
| Non-interactive | hsa:7957   | D00434 |
| Non-interactive | hsa:128853 | D00651 |
| Non-interactive | hsa:1581   | D00218 |
| Non-interactive | hsa:54677  | D03743 |
| Non-interactive | hsa:2322   | D02487 |
| Non-interactive | hsa:4129   | D03741 |
| Non-interactive | hsa:5447   | D00070 |
| Non-interactive | hsa:5052   | D02441 |
| Non-interactive | hsa:4486   | D00658 |
| Non-interactive | hsa:1581   | D00652 |
| Non-interactive | hsa:8654   | D00449 |
| Non-interactive | hsa:5351   | D00340 |
| Non-interactive | hsa:3645   | D01907 |
| Non-interactive | hsa:100    | D01027 |
| Non-interactive | hsa:9945   | D00139 |
| Non-interactive | hsa:55312  | D00947 |
| Non-interactive | hsa:54600  | D00131 |
| Non-interactive | hsa:3615   | D00391 |
| Non-interactive | hsa:238    | D02333 |
| Non-interactive | hsa:7006   | D04025 |
| Non-interactive | hsa:5598   | D00448 |
| Non-interactive | hsa:2766   | D02769 |
| Non-interactive | hsa:191    | D00887 |
| Non-interactive | hsa:1800   | D03767 |
| Non-interactive | hsa:124    | D03816 |
| Non-interactive | hsa:1991   | D02166 |
| Non-interactive | hsa:1583   | D02368 |
| Non-interactive | hsa:35     | D01974 |
| Non-interactive | hsa:54677  | D01844 |
| Non-interactive | hsa:132    | D00139 |
| Non-interactive | hsa:5444   | D00885 |
| Non-interactive | hsa:4942   | D03738 |
| Non-interactive | hsa:216    | D03218 |
| Non-interactive | hsa:5475   | D03882 |
| Non-interactive | hsa:217    | D00538 |
| Non-interactive | hsa:635    | D00538 |
| Non-interactive | hsa:9420   | D00070 |
| Non-interactive | hsa:4058   | D01367 |
| Non-interactive | hsa:6416   | D01828 |
| Non-interactive | hsa:55312  | D03736 |
| Non-interactive | hsa:27115  | D03716 |

|                 |            |        |
|-----------------|------------|--------|
| Non-interactive | hsa:2041   | D00107 |
| Non-interactive | hsa:5537   | D03218 |
| Non-interactive | hsa:3290   | D01370 |
| Non-interactive | hsa:3614   | D06238 |
| Non-interactive | hsa:2044   | D03899 |
| Non-interactive | hsa:23430  | D01974 |
| Non-interactive | hsa:5604   | D03823 |
| Non-interactive | hsa:3001   | D00550 |
| Non-interactive | hsa:657    | D01765 |
| Non-interactive | hsa:5158   | D02769 |
| Non-interactive | hsa:93650  | D02698 |
| Non-interactive | hsa:1579   | D00423 |
| Non-interactive | hsa:9641   | D01275 |
| Non-interactive | hsa:1431   | D00519 |
| Non-interactive | hsa:1576   | D00141 |
| Non-interactive | hsa:7367   | D00283 |
| Non-interactive | hsa:29785  | D02115 |
| Non-interactive | hsa:3551   | D00283 |
| Non-interactive | hsa:5495   | D00653 |
| Non-interactive | hsa:129807 | D00188 |
| Non-interactive | hsa:5331   | D00887 |
| Non-interactive | hsa:7046   | D02375 |
| Non-interactive | hsa:5338   | D02115 |
| Non-interactive | hsa:11238  | D00364 |
| Non-interactive | hsa:1847   | D00283 |
| Non-interactive | hsa:2193   | D00454 |
| Non-interactive | hsa:4915   | D02581 |
| Non-interactive | hsa:1267   | D00120 |
| Non-interactive | hsa:2098   | D03350 |
| Non-interactive | hsa:5650   | D00969 |
| Non-interactive | hsa:196883 | D03710 |
| Non-interactive | hsa:5531   | D02451 |
| Non-interactive | hsa:2050   | D00070 |
| Non-interactive | hsa:246    | D01432 |
| Non-interactive | hsa:1675   | D02709 |
| Non-interactive | hsa:2158   | D00394 |
| Non-interactive | hsa:1890   | D00892 |
| Non-interactive | hsa:10188  | D00963 |
| Non-interactive | hsa:63036  | D01565 |
| Non-interactive | hsa:5516   | D00094 |
| Non-interactive | hsa:55775  | D01441 |
| Non-interactive | hsa:1565   | D00315 |

|                 |            |        |
|-----------------|------------|--------|
| Non-interactive | hsa:8854   | D00218 |
| Non-interactive | hsa:2232   | D00963 |
| Non-interactive | hsa:2161   | D03806 |
| Non-interactive | hsa:613    | D00965 |
| Non-interactive | hsa:84812  | D01164 |
| Non-interactive | hsa:1432   | D03689 |
| Non-interactive | hsa:3988   | D00516 |
| Non-interactive | hsa:5550   | D02229 |
| Non-interactive | hsa:5531   | D01164 |
| Non-interactive | hsa:5051   | D01765 |
| Non-interactive | hsa:51727  | D03736 |
| Non-interactive | hsa:1723   | D04031 |
| Non-interactive | hsa:132160 | D01064 |
| Non-interactive | hsa:100    | D00198 |
| Non-interactive | hsa:1675   | D02166 |
| Non-interactive | hsa:1586   | D03803 |
| Non-interactive | hsa:7957   | D02560 |
| Non-interactive | hsa:5169   | D01911 |
| Non-interactive | hsa:5138   | D02451 |
| Non-interactive | hsa:1852   | D01977 |
| Non-interactive | hsa:1846   | D03899 |
| Non-interactive | hsa:54579  | D00094 |
| Non-interactive | hsa:2339   | D03717 |
| Non-interactive | hsa:5538   | D01828 |
| Non-interactive | hsa:57176  | D00139 |
| Non-interactive | hsa:5294   | D00203 |
| Non-interactive | hsa:5562   | D01984 |
| Non-interactive | hsa:58190  | D03735 |
| Non-interactive | hsa:32     | D02560 |
| Non-interactive | hsa:4353   | D00488 |
| Non-interactive | hsa:1846   | D00414 |
| Non-interactive | hsa:3002   | D02368 |
| Non-interactive | hsa:4353   | D02418 |
| Non-interactive | hsa:1588   | D00002 |
| Non-interactive | hsa:8836   | D03823 |
| Non-interactive | hsa:5144   | D00630 |
| Non-interactive | hsa:2042   | D03735 |
| Non-interactive | hsa:134510 | D03775 |
| Non-interactive | hsa:10549  | D01164 |
| Non-interactive | hsa:11221  | D03743 |
| Non-interactive | hsa:54576  | D03805 |
| Non-interactive | hsa:3643   | D01332 |

|                 |            |        |
|-----------------|------------|--------|
| Non-interactive | hsa:9641   | D00781 |
| Non-interactive | hsa:25824  | D00947 |
| Non-interactive | hsa:1504   | D02368 |
| Non-interactive | hsa:5147   | D03741 |
| Non-interactive | hsa:5476   | D01907 |
| Non-interactive | hsa:7453   | D00434 |
| Non-interactive | hsa:7156   | D01828 |
| Non-interactive | hsa:5152   | D00107 |
| Non-interactive | hsa:55512  | D02709 |
| Non-interactive | hsa:1584   | D01133 |
| Non-interactive | hsa:1557   | D01064 |
| Non-interactive | hsa:2639   | D01918 |
| Non-interactive | hsa:3001   | D03440 |
| Non-interactive | hsa:8836   | D00900 |
| Non-interactive | hsa:5532   | D02008 |
| Non-interactive | hsa:1803   | D00651 |
| Non-interactive | hsa:5495   | D00519 |
| Non-interactive | hsa:5657   | D01164 |
| Non-interactive | hsa:5337   | D03765 |
| Non-interactive | hsa:111    | D02193 |
| Non-interactive | hsa:635    | D00654 |
| Non-interactive | hsa:130399 | D00328 |
| Non-interactive | hsa:3001   | D00516 |
| Non-interactive | hsa:35     | D01866 |
| Non-interactive | hsa:1645   | D04025 |
| Non-interactive | hsa:84532  | D03738 |
| Non-interactive | hsa:5602   | D00437 |
| Non-interactive | hsa:354    | D00889 |
| Non-interactive | hsa:3001   | D00463 |
| Non-interactive | hsa:5351   | D00488 |
| Non-interactive | hsa:7083   | D03798 |
| Non-interactive | hsa:613    | D01397 |
| Non-interactive | hsa:5479   | D00515 |
| Non-interactive | hsa:191    | D04024 |
| Non-interactive | hsa:23436  | D02008 |
| Non-interactive | hsa:2263   | D01276 |
| Non-interactive | hsa:242    | D00805 |
| Non-interactive | hsa:2882   | D00325 |
| Non-interactive | hsa:10056  | D02110 |
| Non-interactive | hsa:1431   | D03767 |
| Non-interactive | hsa:6609   | D00449 |
| Non-interactive | hsa:2595   | D01133 |

|                 |            |        |
|-----------------|------------|--------|
| Non-interactive | hsa:5150   | D02110 |
| Non-interactive | hsa:353    | D02731 |
| Non-interactive | hsa:1056   | D00781 |
| Non-interactive | hsa:3990   | D02698 |
| Non-interactive | hsa:2065   | D01027 |
| Non-interactive | hsa:2193   | D03787 |
| Non-interactive | hsa:38     | D00315 |
| Non-interactive | hsa:2042   | D00733 |
| Non-interactive | hsa:5150   | D00892 |
| Non-interactive | hsa:4017   | D03806 |
| Non-interactive | hsa:2158   | D02008 |
| Non-interactive | hsa:3817   | D00285 |
| Non-interactive | hsa:8435   | D00515 |
| Non-interactive | hsa:2677   | D02756 |
| Non-interactive | hsa:3291   | D01984 |
| Non-interactive | hsa:151531 | D01582 |
| Non-interactive | hsa:5445   | D00225 |
| Non-interactive | hsa:112    | D01196 |
| Non-interactive | hsa:2746   | D01842 |
| Non-interactive | hsa:1545   | D03758 |
| Non-interactive | hsa:150290 | D04025 |
| Non-interactive | hsa:2595   | D03798 |
| Non-interactive | hsa:28     | D02756 |
| Non-interactive | hsa:10825  | D00437 |
| Non-interactive | hsa:23430  | D01211 |
| Non-interactive | hsa:1800   | D00550 |
| Non-interactive | hsa:2224   | D01918 |
| Non-interactive | hsa:2260   | D00658 |
| Non-interactive | hsa:6241   | D01578 |
| Non-interactive | hsa:5330   | D00315 |
| Non-interactive | hsa:2066   | D00387 |
| Non-interactive | hsa:5052   | D03803 |
| Non-interactive | hsa:28     | D00519 |
| Non-interactive | hsa:10269  | D00449 |
| Non-interactive | hsa:3939   | D04031 |
| Non-interactive | hsa:2066   | D01973 |
| Non-interactive | hsa:112    | D00889 |
| Non-interactive | hsa:8972   | D02756 |
| Non-interactive | hsa:5747   | D04025 |
| Non-interactive | hsa:124    | D00963 |
| Non-interactive | hsa:339221 | D03440 |
| Non-interactive | hsa:7957   | D00218 |

|                 |            |        |
|-----------------|------------|--------|
| Non-interactive | hsa:124    | D00658 |
| Non-interactive | hsa:4881   | D00340 |
| Non-interactive | hsa:2822   | D01164 |
| Non-interactive | hsa:1543   | D01844 |
| Non-interactive | hsa:5328   | D02328 |
| Non-interactive | hsa:5137   | D00298 |
| Non-interactive | hsa:2582   | D02375 |
| Non-interactive | hsa:5599   | D02168 |
| Non-interactive | hsa:3551   | D02258 |
| Non-interactive | hsa:51166  | D00155 |
| Non-interactive | hsa:1990   | D00002 |
| Non-interactive | hsa:132160 | D00285 |
| Non-interactive | hsa:6652   | D00155 |
| Non-interactive | hsa:5607   | D00394 |
| Non-interactive | hsa:4282   | D02173 |
| Non-interactive | hsa:53     | D01767 |
| Non-interactive | hsa:51205  | D03788 |
| Non-interactive | hsa:64902  | D02368 |
| Non-interactive | hsa:2339   | D00437 |
| Non-interactive | hsa:51166  | D00651 |
| Non-interactive | hsa:25796  | D02655 |
| Non-interactive | hsa:2098   | D00650 |
| Non-interactive | hsa:1582   | D03689 |
| Non-interactive | hsa:3645   | D03826 |
| Non-interactive | hsa:5150   | D00781 |
| Non-interactive | hsa:2065   | D03788 |
| Non-interactive | hsa:29920  | D03743 |
| Non-interactive | hsa:11238  | D00125 |
| Non-interactive | hsa:5602   | D03823 |
| Non-interactive | hsa:5607   | D00283 |
| Non-interactive | hsa:5515   | D00652 |
| Non-interactive | hsa:3716   | D01825 |
| Non-interactive | hsa:1584   | D00656 |
| Non-interactive | hsa:51207  | D00622 |
| Non-interactive | hsa:28972  | D01866 |
| Non-interactive | hsa:1580   | D01164 |
| Non-interactive | hsa:9945   | D00293 |
| Non-interactive | hsa:30814  | D00463 |
| Non-interactive | hsa:5860   | D02731 |
| Non-interactive | hsa:1360   | D00515 |
| Non-interactive | hsa:30833  | D01885 |
| Non-interactive | hsa:29941  | D01915 |

|                 |            |        |
|-----------------|------------|--------|
| Non-interactive | hsa:225689 | D02194 |
| Non-interactive | hsa:10327  | D03720 |
| Non-interactive | hsa:54659  | D01565 |
| Non-interactive | hsa:29785  | D04025 |
| Non-interactive | hsa:5515   | D03716 |
| Non-interactive | hsa:4953   | D02173 |
| Non-interactive | hsa:10935  | D02333 |
| Non-interactive | hsa:2050   | D00515 |
| Non-interactive | hsa:270    | D00127 |
| Non-interactive | hsa:224    | D00434 |
| Non-interactive | hsa:8288   | D00947 |
| Non-interactive | hsa:7363   | D03758 |
| Non-interactive | hsa:23239  | D00394 |
| Non-interactive | hsa:5050   | D00538 |
| Non-interactive | hsa:219    | D00434 |
| Non-interactive | hsa:63904  | D01332 |
| Non-interactive | hsa:7535   | D03805 |
| Non-interactive | hsa:4835   | D02655 |
| Non-interactive | hsa:84532  | D00488 |
| Non-interactive | hsa:326625 | D04031 |
| Non-interactive | hsa:1586   | D00488 |
| Non-interactive | hsa:142679 | D02173 |
| Non-interactive | hsa:513    | D00630 |
| Non-interactive | hsa:80824  | D03077 |
| Non-interactive | hsa:5470   | D00969 |
| Non-interactive | hsa:4282   | D01370 |
| Non-interactive | hsa:52     | D03012 |
| Non-interactive | hsa:1588   | D04024 |
| Non-interactive | hsa:22954  | D00387 |
| Non-interactive | hsa:93650  | D00463 |
| Non-interactive | hsa:5602   | D04029 |
| Non-interactive | hsa:5052   | D00414 |
| Non-interactive | hsa:112    | D00596 |
| Non-interactive | hsa:1956   | D00623 |
| Non-interactive | hsa:5747   | D00550 |
| Non-interactive | hsa:5531   | D03736 |
| Non-interactive | hsa:2280   | D00196 |
| Non-interactive | hsa:242    | D03738 |
| Non-interactive | hsa:8654   | D00533 |
| Non-interactive | hsa:7298   | D00550 |
| Non-interactive | hsa:260293 | D00448 |
| Non-interactive | hsa:94009  | D00131 |

|                 |            |        |
|-----------------|------------|--------|
| Non-interactive | hsa:6713   | D00622 |
| Non-interactive | hsa:377677 | D01828 |
| Non-interactive | hsa:285220 | D00813 |
| Non-interactive | hsa:3988   | D00885 |
| Non-interactive | hsa:658    | D00449 |
| Non-interactive | hsa:5602   | D00455 |
| Non-interactive | hsa:5562   | D00533 |
| Non-interactive | hsa:8529   | D00414 |
| Non-interactive | hsa:5167   | D00530 |
| Non-interactive | hsa:5330   | D02333 |
| Non-interactive | hsa:2534   | D02194 |
| Non-interactive | hsa:2261   | D01064 |
| Non-interactive | hsa:30814  | D00155 |
| Non-interactive | hsa:1800   | D00218 |
| Non-interactive | hsa:3291   | D00620 |
| Non-interactive | hsa:2595   | D01240 |
| Non-interactive | hsa:4860   | D00654 |
| Non-interactive | hsa:5033   | D01690 |
| Non-interactive | hsa:111    | D00285 |
| Non-interactive | hsa:9420   | D00094 |
| Non-interactive | hsa:8288   | D02671 |
| Non-interactive | hsa:5143   | D00131 |
| Non-interactive | hsa:2180   | D01196 |
| Non-interactive | hsa:4482   | D00519 |
| Non-interactive | hsa:18     | D00620 |
| Non-interactive | hsa:768    | D00131 |
| Non-interactive | hsa:56922  | D04031 |
| Non-interactive | hsa:2044   | D01276 |
| Non-interactive | hsa:1845   | D02451 |
| Non-interactive | hsa:7957   | D01275 |
| Non-interactive | hsa:3002   | D02655 |
| Non-interactive | hsa:1549   | D00969 |
| Non-interactive | hsa:84152  | D01690 |
| Non-interactive | hsa:5138   | D00563 |
| Non-interactive | hsa:8940   | D00519 |
| Non-interactive | hsa:2263   | D01842 |
| Non-interactive | hsa:660    | D00892 |
| Non-interactive | hsa:495    | D00398 |
| Non-interactive | hsa:51365  | D02110 |
| Non-interactive | hsa:5145   | D00294 |
| Non-interactive | hsa:5422   | D00902 |
| Non-interactive | hsa:327    | D03765 |



|                 |            |        |
|-----------------|------------|--------|
| Non-interactive | hsa:115    | D03806 |
| Non-interactive | hsa:30     | D03717 |
| Non-interactive | hsa:5494   | D01565 |
| Non-interactive | hsa:7155   | D00094 |
| Non-interactive | hsa:9388   | D00359 |
| Non-interactive | hsa:218    | D00752 |
| Non-interactive | hsa:53     | D01915 |
| Non-interactive | hsa:54878  | D00198 |
| Non-interactive | hsa:765    | D03823 |
| Non-interactive | hsa:5445   | D00813 |
| Non-interactive | hsa:6716   | D03712 |
| Non-interactive | hsa:1056   | D00884 |
| Non-interactive | hsa:4067   | D02328 |
| Non-interactive | hsa:5052   | D03882 |
| Non-interactive | hsa:51365  | D00328 |
| Non-interactive | hsa:115    | D02173 |
| Non-interactive | hsa:7046   | D02556 |
| Non-interactive | hsa:5608   | D01276 |
| Non-interactive | hsa:5423   | D00900 |
| Non-interactive | hsa:7010   | D00148 |
| Non-interactive | hsa:5650   | D02671 |
| Non-interactive | hsa:645    | D01064 |
| Non-interactive | hsa:5837   | D03689 |
| Non-interactive | hsa:1800   | D03736 |
| Non-interactive | hsa:10269  | D00387 |
| Non-interactive | hsa:5148   | D04029 |
| Non-interactive | hsa:2042   | D01367 |
| Non-interactive | hsa:30833  | D00515 |
| Non-interactive | hsa:29920  | D03805 |
| Non-interactive | hsa:5831   | D00515 |
| Non-interactive | hsa:5407   | D00892 |
| Non-interactive | hsa:55775  | D02731 |
| Non-interactive | hsa:5144   | D04025 |
| Non-interactive | hsa:64902  | D01828 |
| Non-interactive | hsa:29920  | D03826 |
| Non-interactive | hsa:7075   | D00107 |
| Non-interactive | hsa:3028   | D00218 |
| Non-interactive | hsa:91     | D01825 |
| Non-interactive | hsa:133121 | D00516 |
| Non-interactive | hsa:2066   | D02451 |
| Non-interactive | hsa:10549  | D03012 |
| Non-interactive | hsa:5837   | D01765 |

|                 |            |        |
|-----------------|------------|--------|
| Non-interactive | hsa:7957   | D00630 |
| Non-interactive | hsa:51     | D02229 |
| Non-interactive | hsa:34     | D04029 |
| Non-interactive | hsa:1584   | D03736 |
| Non-interactive | hsa:7301   | D02671 |
| Non-interactive | hsa:766    | D00216 |
| Non-interactive | hsa:5550   | D02556 |
| Non-interactive | hsa:4129   | D02451 |
| Non-interactive | hsa:8836   | D01918 |
| Non-interactive | hsa:54878  | D00364 |
| Non-interactive | hsa:55811  | D01264 |
| Non-interactive | hsa:3990   | D00188 |
| Non-interactive | hsa:8836   | D02375 |
| Non-interactive | hsa:5972   | D01332 |
| Non-interactive | hsa:28972  | D00294 |
| Non-interactive | hsa:6713   | D00394 |
| Non-interactive | hsa:2180   | D02698 |
| Non-interactive | hsa:5538   | D00596 |
| Non-interactive | hsa:7365   | D02487 |
| Non-interactive | hsa:4953   | D00414 |
| Non-interactive | hsa:683    | D03720 |
| Non-interactive | hsa:6898   | D03717 |
| Non-interactive | hsa:151531 | D02731 |
| Non-interactive | hsa:50484  | D00455 |
| Non-interactive | hsa:353    | D00391 |
| Non-interactive | hsa:2882   | D00519 |
| Non-interactive | hsa:3906   | D02709 |
| Non-interactive | hsa:4190   | D01397 |
| Non-interactive | hsa:51205  | D00563 |
| Non-interactive | hsa:94009  | D02229 |
| Non-interactive | hsa:5333   | D04024 |
| Non-interactive | hsa:51251  | D01862 |
| Non-interactive | hsa:57016  | D00563 |
| Non-interactive | hsa:660    | D03788 |
| Non-interactive | hsa:7298   | D03758 |
| Non-interactive | hsa:1033   | D00965 |
| Non-interactive | hsa:4593   | D00225 |
| Non-interactive | hsa:54677  | D01223 |
| Non-interactive | hsa:4190   | D01828 |
| Non-interactive | hsa:4145   | D00423 |
| Non-interactive | hsa:6713   | D03728 |
| Non-interactive | hsa:5322   | D03738 |

|                 |           |        |
|-----------------|-----------|--------|
| Non-interactive | hsa:51727 | D03350 |
| Non-interactive | hsa:2064  | D00892 |
| Non-interactive | hsa:10056 | D01715 |
| Non-interactive | hsa:2639  | D03778 |
| Non-interactive | hsa:327   | D00969 |
| Non-interactive | hsa:28227 | D02709 |
| Non-interactive | hsa:1549  | D00813 |
| Non-interactive | hsa:1571  | D00538 |
| Non-interactive | hsa:11072 | D01441 |
| Non-interactive | hsa:3614  | D01862 |
| Non-interactive | hsa:9647  | D00630 |
| Non-interactive | hsa:6897  | D03816 |
| Non-interactive | hsa:670   | D00216 |
| Non-interactive | hsa:29968 | D00387 |
| Non-interactive | hsa:7010  | D03643 |
| Non-interactive | hsa:4128  | D03805 |
| Non-interactive | hsa:9150  | D01196 |
| Non-interactive | hsa:216   | D00537 |
| Non-interactive | hsa:1549  | D03882 |
| Non-interactive | hsa:10461 | D00018 |
| Non-interactive | hsa:7372  | D00285 |
| Non-interactive | hsa:5834  | D00394 |
| Non-interactive | hsa:1432  | D03350 |
| Non-interactive | hsa:2242  | D00623 |
| Non-interactive | hsa:1990  | D00550 |
| Non-interactive | hsa:4552  | D00398 |
| Non-interactive | hsa:124   | D00902 |
| Non-interactive | hsa:7364  | D01119 |
| Non-interactive | hsa:64816 | D00463 |
| Non-interactive | hsa:5479  | D01690 |
| Non-interactive | hsa:2339  | D03689 |
| Non-interactive | hsa:91039 | D01211 |
| Non-interactive | hsa:2328  | D03734 |
| Non-interactive | hsa:2326  | D03350 |
| Non-interactive | hsa:7172  | D00005 |
| Non-interactive | hsa:28227 | D00753 |
| Non-interactive | hsa:3035  | D03778 |
| Non-interactive | hsa:6713  | D01432 |
| Non-interactive | hsa:54600 | D00391 |
| Non-interactive | hsa:5096  | D00364 |
| Non-interactive | hsa:8940  | D00196 |
| Non-interactive | hsa:5168  | D01715 |

|                 |           |        |
|-----------------|-----------|--------|
| Non-interactive | hsa:54490 | D00315 |
| Non-interactive | hsa:54490 | D01565 |
| Non-interactive | hsa:8399  | D02756 |
| Non-interactive | hsa:1548  | D00550 |
| Non-interactive | hsa:189   | D03828 |
| Non-interactive | hsa:5979  | D03899 |
| Non-interactive | hsa:32    | D01984 |
| Non-interactive | hsa:7535  | D00969 |
| Non-interactive | hsa:5657  | D02375 |
| Non-interactive | hsa:2638  | D00530 |
| Non-interactive | hsa:3001  | D00218 |
| Non-interactive | hsa:9088  | D00537 |
| Non-interactive | hsa:94009 | D02115 |
| Non-interactive | hsa:1215  | D00139 |
| Non-interactive | hsa:128   | D03788 |
| Non-interactive | hsa:93    | D02008 |
| Non-interactive | hsa:31    | D00198 |
| Non-interactive | hsa:3945  | D02487 |
| Non-interactive | hsa:2322  | D01718 |
| Non-interactive | hsa:11330 | D04031 |
| Non-interactive | hsa:51727 | D02487 |
| Non-interactive | hsa:8622  | D00283 |
| Non-interactive | hsa:5151  | D04024 |
| Non-interactive | hsa:5601  | D00325 |
| Non-interactive | hsa:93    | D00141 |
| Non-interactive | hsa:1557  | D01196 |
| Non-interactive | hsa:54657 | D00298 |
| Non-interactive | hsa:2950  | D00142 |
| Non-interactive | hsa:5605  | D03823 |
| Non-interactive | hsa:1543  | D02487 |
| Non-interactive | hsa:9150  | D00463 |
| Non-interactive | hsa:4837  | D00455 |
| Non-interactive | hsa:5147  | D02173 |
| Non-interactive | hsa:55    | D03899 |
| Non-interactive | hsa:4916  | D02258 |
| Non-interactive | hsa:242   | D03712 |
| Non-interactive | hsa:1445  | D00127 |
| Non-interactive | hsa:6768  | D00884 |
| Non-interactive | hsa:2280  | D00516 |
| Non-interactive | hsa:218   | D00654 |
| Non-interactive | hsa:5053  | D01973 |
| Non-interactive | hsa:768   | D00423 |

|                 |           |        |
|-----------------|-----------|--------|
| Non-interactive | hsa:8836  | D02194 |
| Non-interactive | hsa:3818  | D02418 |
| Non-interactive | hsa:5152  | D02194 |
| Non-interactive | hsa:8513  | D01133 |
| Non-interactive | hsa:5533  | D03767 |
| Non-interactive | hsa:3932  | D01027 |
| Non-interactive | hsa:7046  | D01915 |
| Non-interactive | hsa:5406  | D00488 |
| Non-interactive | hsa:219   | D01842 |
| Non-interactive | hsa:1431  | D00423 |
| Non-interactive | hsa:4953  | D01578 |
| Non-interactive | hsa:84152 | D03788 |
| Non-interactive | hsa:100   | D00752 |
| Non-interactive | hsa:111   | D01256 |
| Non-interactive | hsa:8622  | D00070 |
| Non-interactive | hsa:4311  | D02441 |
| Non-interactive | hsa:9420  | D00328 |
| Non-interactive | hsa:7156  | D00900 |
| Non-interactive | hsa:10720 | D00448 |
| Non-interactive | hsa:238   | D03788 |
| Non-interactive | hsa:43    | D01275 |
| Non-interactive | hsa:4482  | D01211 |
| Non-interactive | hsa:35    | D01133 |
| Non-interactive | hsa:27032 | D01825 |
| Non-interactive | hsa:5494  | D00771 |
| Non-interactive | hsa:30814 | D00094 |
| Non-interactive | hsa:5050  | D00208 |
| Non-interactive | hsa:7367  | D00285 |
| Non-interactive | hsa:2328  | D00449 |
| Non-interactive | hsa:5495  | D03882 |
| Non-interactive | hsa:30    | D04029 |
| Non-interactive | hsa:5053  | D00198 |
| Non-interactive | hsa:8836  | D00107 |
| Non-interactive | hsa:5747  | D02769 |
| Non-interactive | hsa:2328  | D01133 |
| Non-interactive | hsa:5152  | D01907 |
| Non-interactive | hsa:64802 | D01977 |
| Non-interactive | hsa:125   | D01276 |
| Non-interactive | hsa:7010  | D00596 |
| Non-interactive | hsa:834   | D00885 |
| Non-interactive | hsa:64087 | D01866 |
| Non-interactive | hsa:10941 | D00398 |

|                 |            |        |
|-----------------|------------|--------|
| Non-interactive | hsa:51251  | D00651 |
| Non-interactive | hsa:55811  | D01885 |
| Non-interactive | hsa:1436   | D02556 |
| Non-interactive | hsa:5336   | D00902 |
| Non-interactive | hsa:8556   | D00387 |
| Non-interactive | hsa:84152  | D00449 |
| Non-interactive | hsa:4835   | D04031 |
| Non-interactive | hsa:1571   | D00651 |
| Non-interactive | hsa:6799   | D00887 |
| Non-interactive | hsa:8622   | D00293 |
| Non-interactive | hsa:2260   | D03826 |
| Non-interactive | hsa:5562   | D01974 |
| Non-interactive | hsa:36     | D00885 |
| Non-interactive | hsa:1360   | D03643 |
| Non-interactive | hsa:115    | D04031 |
| Non-interactive | hsa:112    | D00325 |
| Non-interactive | hsa:5547   | D01256 |
| Non-interactive | hsa:284541 | D03743 |
| Non-interactive | hsa:4907   | D00324 |
| Non-interactive | hsa:5499   | D00449 |
| Non-interactive | hsa:111    | D00654 |
| Non-interactive | hsa:5140   | D00889 |
| Non-interactive | hsa:5834   | D04025 |
| Non-interactive | hsa:5602   | D00753 |
| Non-interactive | hsa:4023   | D02580 |
| Non-interactive | hsa:51166  | D02375 |
| Non-interactive | hsa:5595   | D02769 |
| Non-interactive | hsa:79799  | D00294 |
| Non-interactive | hsa:7172   | D00148 |
| Non-interactive | hsa:2185   | D01180 |
| Non-interactive | hsa:6716   | D01767 |
| Non-interactive | hsa:3791   | D00620 |
| Non-interactive | hsa:28     | D00328 |
| Non-interactive | hsa:13     | D00516 |
| Non-interactive | hsa:1803   | D00141 |
| Non-interactive | hsa:3645   | D00131 |
| Non-interactive | hsa:6240   | D00884 |
| Non-interactive | hsa:5319   | D03806 |
| Non-interactive | hsa:444    | D00094 |
| Non-interactive | hsa:5052   | D00887 |
| Non-interactive | hsa:6610   | D03716 |
| Non-interactive | hsa:6652   | D00567 |

|                 |           |        |
|-----------------|-----------|--------|
| Non-interactive | hsa:2242  | D00141 |
| Non-interactive | hsa:5335  | D00538 |
| Non-interactive | hsa:590   | D00620 |
| Non-interactive | hsa:50    | D00218 |
| Non-interactive | hsa:216   | D00533 |
| Non-interactive | hsa:1376  | D00454 |
| Non-interactive | hsa:4128  | D00298 |
| Non-interactive | hsa:5422  | D00455 |
| Non-interactive | hsa:1549  | D02110 |
| Non-interactive | hsa:2064  | D00293 |
| Non-interactive | hsa:10056 | D02418 |
| Non-interactive | hsa:1549  | D03743 |
| Non-interactive | hsa:1579  | D01133 |
| Non-interactive | hsa:5140  | D00448 |
| Non-interactive | hsa:43    | D03788 |
| Non-interactive | hsa:84152 | D03716 |
| Non-interactive | hsa:2147  | D00884 |
| Non-interactive | hsa:5140  | D00887 |
| Non-interactive | hsa:57176 | D00449 |
| Non-interactive | hsa:7015  | D00094 |
| Non-interactive | hsa:5156  | D03803 |
| Non-interactive | hsa:686   | D00216 |
| Non-interactive | hsa:5407  | D02556 |
| Non-interactive | hsa:8192  | D00596 |
| Non-interactive | hsa:5320  | D00050 |
| Non-interactive | hsa:5597  | D00448 |
| Non-interactive | hsa:3001  | D00002 |
| Non-interactive | hsa:2638  | D00623 |
| Non-interactive | hsa:765   | D00969 |
| Non-interactive | hsa:55902 | D00593 |
| Non-interactive | hsa:5053  | D01397 |
| Non-interactive | hsa:5335  | D01765 |
| Non-interactive | hsa:3141  | D03767 |
| Non-interactive | hsa:4025  | D00752 |
| Non-interactive | hsa:128   | D02194 |
| Non-interactive | hsa:30833 | D01715 |
| Non-interactive | hsa:54576 | D01164 |
| Non-interactive | hsa:5294  | D01264 |
| Non-interactive | hsa:8556  | D03805 |
| Non-interactive | hsa:5754  | D00567 |
| Non-interactive | hsa:10279 | D03798 |
| Non-interactive | hsa:2882  | D00131 |

|                 |            |        |
|-----------------|------------|--------|
| Non-interactive | hsa:5033   | D03826 |
| Non-interactive | hsa:54657  | D00364 |
| Non-interactive | hsa:10667  | D00437 |
| Non-interactive | hsa:501    | D01211 |
| Non-interactive | hsa:2822   | D00781 |
| Non-interactive | hsa:1848   | D00018 |
| Non-interactive | hsa:1360   | D01718 |
| Non-interactive | hsa:3141   | D01973 |
| Non-interactive | hsa:4881   | D01275 |
| Non-interactive | hsa:7153   | D00567 |
| Non-interactive | hsa:1723   | D03716 |
| Non-interactive | hsa:349565 | D00315 |
| Non-interactive | hsa:4311   | D00394 |
| Non-interactive | hsa:64902  | D03765 |
| Non-interactive | hsa:2806   | D03823 |
| Non-interactive | hsa:5033   | D00654 |
| Non-interactive | hsa:64499  | D02333 |
| Non-interactive | hsa:5447   | D03826 |
| Non-interactive | hsa:5530   | D01240 |
| Non-interactive | hsa:2065   | D04029 |
| Non-interactive | hsa:36     | D00203 |
| Non-interactive | hsa:5501   | D00188 |
| Non-interactive | hsa:54878  | D00131 |
| Non-interactive | hsa:1583   | D00120 |
| Non-interactive | hsa:767    | D00805 |
| Non-interactive | hsa:5650   | D00900 |
| Non-interactive | hsa:7365   | D00893 |
| Non-interactive | hsa:5595   | D02214 |
| Non-interactive | hsa:54878  | D00813 |
| Non-interactive | hsa:5144   | D00652 |
| Non-interactive | hsa:1374   | D01844 |
| Non-interactive | hsa:32     | D02328 |
| Non-interactive | hsa:1991   | D00969 |
| Non-interactive | hsa:1445   | D00002 |
| Non-interactive | hsa:5294   | D02258 |
| Non-interactive | hsa:7174   | D03689 |
| Non-interactive | hsa:5096   | D00622 |
| Non-interactive | hsa:4915   | D00455 |
| Non-interactive | hsa:1719   | D02698 |
| Non-interactive | hsa:43     | D00148 |
| Non-interactive | hsa:558    | D00070 |
| Non-interactive | hsa:1565   | D02441 |



|                 |           |        |
|-----------------|-----------|--------|
| Non-interactive | hsa:7301  | D00127 |
| Non-interactive | hsa:32    | D01432 |
| Non-interactive | hsa:5479  | D00653 |
| Non-interactive | hsa:5147  | D00902 |
| Non-interactive | hsa:1545  | D02368 |
| Non-interactive | hsa:4311  | D00654 |
| Non-interactive | hsa:125   | D01688 |
| Non-interactive | hsa:10667 | D01397 |
| Non-interactive | hsa:1845  | D03077 |
| Non-interactive | hsa:3932  | D02560 |
| Non-interactive | hsa:5494  | D02769 |
| Non-interactive | hsa:6416  | D00733 |
| Non-interactive | hsa:23475 | D01196 |
| Non-interactive | hsa:9088  | D01844 |
| Non-interactive | hsa:5604  | D03077 |
| Non-interactive | hsa:5049  | D01690 |
| Non-interactive | hsa:3295  | D00652 |
| Non-interactive | hsa:2356  | D03743 |
| Non-interactive | hsa:5837  | D01715 |
| Non-interactive | hsa:8622  | D00131 |
| Non-interactive | hsa:54677 | D00651 |
| Non-interactive | hsa:6416  | D00656 |
| Non-interactive | hsa:5979  | D03803 |
| Non-interactive | hsa:247   | D00107 |
| Non-interactive | hsa:657   | D02671 |
| Non-interactive | hsa:11221 | D00196 |
| Non-interactive | hsa:3645  | D00298 |
| Non-interactive | hsa:5495  | D02731 |
| Non-interactive | hsa:23632 | D01276 |
| Non-interactive | hsa:2049  | D00198 |
| Non-interactive | hsa:2155  | D04292 |
| Non-interactive | hsa:224   | D01825 |
| Non-interactive | hsa:5608  | D00655 |
| Non-interactive | hsa:10667 | D02581 |
| Non-interactive | hsa:2047  | D03805 |
| Non-interactive | hsa:84152 | D03734 |
| Non-interactive | hsa:4067  | D00387 |
| Non-interactive | hsa:5607  | D01275 |
| Non-interactive | hsa:3791  | D01275 |
| Non-interactive | hsa:1376  | D00620 |
| Non-interactive | hsa:85313 | D01973 |
| Non-interactive | hsa:2280  | D01974 |

|                 |            |        |
|-----------------|------------|--------|
| Non-interactive | hsa:771    | D00963 |
| Non-interactive | hsa:9088   | D00187 |
| Non-interactive | hsa:51251  | D01256 |
| Non-interactive | hsa:7075   | D00947 |
| Non-interactive | hsa:8622   | D03728 |
| Non-interactive | hsa:29785  | D02698 |
| Non-interactive | hsa:6716   | D03803 |
| Non-interactive | hsa:5050   | D00656 |
| Non-interactive | hsa:7299   | D00298 |
| Non-interactive | hsa:5142   | D00002 |
| Non-interactive | hsa:7525   | D02110 |
| Non-interactive | hsa:5650   | D00965 |
| Non-interactive | hsa:1636   | D04025 |
| Non-interactive | hsa:1593   | D03751 |
| Non-interactive | hsa:196883 | D02769 |
| Non-interactive | hsa:5531   | D02418 |
| Non-interactive | hsa:64802  | D04292 |
| Non-interactive | hsa:246    | D01180 |
| Non-interactive | hsa:1580   | D02168 |
| Non-interactive | hsa:57176  | D00414 |
| Non-interactive | hsa:80339  | D00887 |
| Non-interactive | hsa:8940   | D03077 |
| Non-interactive | hsa:1890   | D00884 |
| Non-interactive | hsa:5337   | D00651 |
| Non-interactive | hsa:1573   | D01264 |
| Non-interactive | hsa:10188  | D00969 |
| Non-interactive | hsa:1843   | D03012 |
| Non-interactive | hsa:5142   | D02441 |
| Non-interactive | hsa:5422   | D00203 |
| Non-interactive | hsa:1576   | D01885 |
| Non-interactive | hsa:55775  | D03758 |
| Non-interactive | hsa:2045   | D00298 |
| Non-interactive | hsa:2232   | D00885 |
| Non-interactive | hsa:5053   | D00947 |
| Non-interactive | hsa:5144   | D00550 |
| Non-interactive | hsa:247    | D01180 |
| Non-interactive | hsa:1584   | D02328 |
| Non-interactive | hsa:613    | D00947 |
| Non-interactive | hsa:51292  | D00752 |
| Non-interactive | hsa:1432   | D03710 |
| Non-interactive | hsa:5550   | D02042 |
| Non-interactive | hsa:63904  | D00364 |

|                 |           |        |
|-----------------|-----------|--------|
| Non-interactive | hsa:5051  | D01915 |
| Non-interactive | hsa:51727 | D03735 |
| Non-interactive | hsa:5478  | D00530 |
| Non-interactive | hsa:1723  | D04024 |
| Non-interactive | hsa:100   | D00196 |
| Non-interactive | hsa:1675  | D01977 |
| Non-interactive | hsa:1586  | D03775 |
| Non-interactive | hsa:7957  | D02441 |
| Non-interactive | hsa:5169  | D01862 |
| Non-interactive | hsa:5138  | D02375 |
| Non-interactive | hsa:1852  | D01918 |
| Non-interactive | hsa:2339  | D02580 |
| Non-interactive | hsa:2582  | D03218 |
| Non-interactive | hsa:5294  | D00188 |
| Non-interactive | hsa:5562  | D01918 |
| Non-interactive | hsa:58190 | D03734 |
| Non-interactive | hsa:4353  | D00516 |
| Non-interactive | hsa:3002  | D02375 |
| Non-interactive | hsa:2766  | D02193 |
| Non-interactive | hsa:5601  | D00654 |
| Non-interactive | hsa:8836  | D03826 |
| Non-interactive | hsa:2042  | D03710 |
| Non-interactive | hsa:2673  | D02193 |
| Non-interactive | hsa:10549 | D01133 |
| Non-interactive | hsa:54576 | D03765 |
| Non-interactive | hsa:7172  | D03751 |
| Non-interactive | hsa:9641  | D00771 |
| Non-interactive | hsa:128   | D03816 |
| Non-interactive | hsa:5147  | D03728 |
| Non-interactive | hsa:23475 | D00188 |
| Non-interactive | hsa:5033  | D02258 |
| Non-interactive | hsa:5476  | D01715 |
| Non-interactive | hsa:7453  | D00437 |
| Non-interactive | hsa:3712  | D03803 |
| Non-interactive | hsa:7156  | D01767 |
| Non-interactive | hsa:1990  | D04025 |
| Non-interactive | hsa:1584  | D01061 |
| Non-interactive | hsa:683   | D00733 |
| Non-interactive | hsa:2639  | D01842 |
| Non-interactive | hsa:6799  | D03735 |
| Non-interactive | hsa:8836  | D00889 |
| Non-interactive | hsa:5532  | D01977 |

|                 |            |        |
|-----------------|------------|--------|
| Non-interactive | hsa:58190  | D01918 |
| Non-interactive | hsa:8555   | D00623 |
| Non-interactive | hsa:1803   | D00653 |
| Non-interactive | hsa:84706  | D01688 |
| Non-interactive | hsa:111    | D02214 |
| Non-interactive | hsa:4953   | D01825 |
| Non-interactive | hsa:635    | D00630 |
| Non-interactive | hsa:130399 | D00325 |
| Non-interactive | hsa:84706  | D00516 |
| Non-interactive | hsa:3001   | D00515 |
| Non-interactive | hsa:1645   | D03806 |
| Non-interactive | hsa:84532  | D03717 |
| Non-interactive | hsa:354    | D00965 |
| Non-interactive | hsa:3001   | D00455 |
| Non-interactive | hsa:3717   | D00781 |
| Non-interactive | hsa:7083   | D03803 |
| Non-interactive | hsa:1719   | D00963 |
| Non-interactive | hsa:191    | D03806 |
| Non-interactive | hsa:23436  | D01718 |
| Non-interactive | hsa:242    | D00650 |
| Non-interactive | hsa:2882   | D00285 |
| Non-interactive | hsa:51     | D02709 |
| Non-interactive | hsa:10056  | D02168 |
| Non-interactive | hsa:1431   | D03765 |
| Non-interactive | hsa:2595   | D00963 |
| Non-interactive | hsa:353    | D03440 |
| Non-interactive | hsa:1056   | D00753 |
| Non-interactive | hsa:3990   | D02709 |
| Non-interactive | hsa:54677  | D01866 |
| Non-interactive | hsa:51205  | D02328 |
| Non-interactive | hsa:2065   | D00947 |
| Non-interactive | hsa:1573   | D02333 |
| Non-interactive | hsa:2193   | D03758 |
| Non-interactive | hsa:2042   | D00652 |
| Non-interactive | hsa:51727  | D02451 |
| Non-interactive | hsa:2158   | D01907 |
| Non-interactive | hsa:115    | D01862 |
| Non-interactive | hsa:5516   | D00892 |
| Non-interactive | hsa:81579  | D03734 |
| Non-interactive | hsa:112    | D01240 |
| Non-interactive | hsa:2746   | D01690 |
| Non-interactive | hsa:55775  | D00285 |

|                 |            |        |
|-----------------|------------|--------|
| Non-interactive | hsa:2595   | D00437 |
| Non-interactive | hsa:6646   | D00947 |
| Non-interactive | hsa:7075   | D00187 |
| Non-interactive | hsa:2224   | D01825 |
| Non-interactive | hsa:2260   | D00596 |
| Non-interactive | hsa:5330   | D00298 |
| Non-interactive | hsa:23475  | D01061 |
| Non-interactive | hsa:28     | D00463 |
| Non-interactive | hsa:476    | D01180 |
| Non-interactive | hsa:2065   | D01061 |
| Non-interactive | hsa:2822   | D00488 |
| Non-interactive | hsa:10269  | D00454 |
| Non-interactive | hsa:3939   | D04292 |
| Non-interactive | hsa:8972   | D02731 |
| Non-interactive | hsa:2224   | D00654 |
| Non-interactive | hsa:54578  | D00107 |
| Non-interactive | hsa:5747   | D03882 |
| Non-interactive | hsa:339221 | D03689 |
| Non-interactive | hsa:2324   | D00340 |
| Non-interactive | hsa:124    | D00654 |
| Non-interactive | hsa:1719   | D00652 |
| Non-interactive | hsa:1543   | D01866 |
| Non-interactive | hsa:5137   | D00285 |
| Non-interactive | hsa:2582   | D02229 |
| Non-interactive | hsa:5599   | D01974 |
| Non-interactive | hsa:5447   | D00414 |
| Non-interactive | hsa:218    | D00530 |
| Non-interactive | hsa:85313  | D00902 |
| Non-interactive | hsa:51166  | D00187 |
| Non-interactive | hsa:8836   | D00142 |
| Non-interactive | hsa:1969   | D03882 |
| Non-interactive | hsa:5657   | D00538 |
| Non-interactive | hsa:4282   | D02258 |
| Non-interactive | hsa:53     | D01825 |
| Non-interactive | hsa:5979   | D00656 |
| Non-interactive | hsa:5423   | D00285 |
| Non-interactive | hsa:2339   | D00340 |
| Non-interactive | hsa:2135   | D00141 |
| Non-interactive | hsa:2098   | D00620 |
| Non-interactive | hsa:1582   | D03077 |
| Non-interactive | hsa:3818   | D00070 |
| Non-interactive | hsa:327    | D00449 |

|                 |            |        |
|-----------------|------------|--------|
| Non-interactive | hsa:11238  | D00131 |
| Non-interactive | hsa:5602   | D03816 |
| Non-interactive | hsa:5607   | D00285 |
| Non-interactive | hsa:3716   | D01918 |
| Non-interactive | hsa:1584   | D00650 |
| Non-interactive | hsa:51181  | D00359 |
| Non-interactive | hsa:9641   | D01119 |
| Non-interactive | hsa:51207  | D00652 |
| Non-interactive | hsa:5645   | D00488 |
| Non-interactive | hsa:1580   | D01027 |
| Non-interactive | hsa:9945   | D00298 |
| Non-interactive | hsa:7365   | D00340 |
| Non-interactive | hsa:2638   | D00651 |
| Non-interactive | hsa:3290   | D00448 |
| Non-interactive | hsa:5052   | D00005 |
| Non-interactive | hsa:30833  | D01866 |
| Non-interactive | hsa:1384   | D00593 |
| Non-interactive | hsa:3551   | D00398 |
| Non-interactive | hsa:6610   | D02581 |
| Non-interactive | hsa:29941  | D01862 |
| Non-interactive | hsa:225689 | D01974 |
| Non-interactive | hsa:10327  | D03728 |
| Non-interactive | hsa:6609   | D02193 |
| Non-interactive | hsa:54659  | D01275 |
| Non-interactive | hsa:2582   | D02173 |
| Non-interactive | hsa:26279  | D00516 |
| Non-interactive | hsa:2950   | D00437 |
| Non-interactive | hsa:2050   | D00463 |
| Non-interactive | hsa:224    | D00387 |
| Non-interactive | hsa:5444   | D00359 |
| Non-interactive | hsa:23239  | D00293 |
| Non-interactive | hsa:219    | D00391 |
| Non-interactive | hsa:7535   | D03816 |
| Non-interactive | hsa:84532  | D00437 |
| Non-interactive | hsa:1586   | D00455 |
| Non-interactive | hsa:2160   | D00315 |
| Non-interactive | hsa:513    | D00654 |
| Non-interactive | hsa:80824  | D02581 |
| Non-interactive | hsa:5470   | D00889 |
| Non-interactive | hsa:52     | D02769 |
| Non-interactive | hsa:768    | D00196 |
| Non-interactive | hsa:9088   | D00127 |

|                 |            |        |
|-----------------|------------|--------|
| Non-interactive | hsa:22954  | D00340 |
| Non-interactive | hsa:4143   | D03826 |
| Non-interactive | hsa:31     | D02328 |
| Non-interactive | hsa:2147   | D00753 |
| Non-interactive | hsa:112    | D00623 |
| Non-interactive | hsa:1593   | D03736 |
| Non-interactive | hsa:5531   | D03735 |
| Non-interactive | hsa:242    | D03218 |
| Non-interactive | hsa:27032  | D00188 |
| Non-interactive | hsa:5601   | D00454 |
| Non-interactive | hsa:6646   | D00196 |
| Non-interactive | hsa:27032  | D00094 |
| Non-interactive | hsa:2185   | D02193 |
| Non-interactive | hsa:6713   | D00620 |
| Non-interactive | hsa:377677 | D01885 |
| Non-interactive | hsa:84695  | D00900 |
| Non-interactive | hsa:5530   | D01264 |
| Non-interactive | hsa:3988   | D00893 |
| Non-interactive | hsa:5319   | D00325 |
| Non-interactive | hsa:5602   | D00448 |
| Non-interactive | hsa:2534   | D01915 |
| Non-interactive | hsa:2261   | D00947 |
| Non-interactive | hsa:377677 | D00900 |
| Non-interactive | hsa:3480   | D02580 |
| Non-interactive | hsa:38     | D00018 |
| Non-interactive | hsa:30814  | D00148 |
| Non-interactive | hsa:189    | D03741 |
| Non-interactive | hsa:1571   | D02193 |
| Non-interactive | hsa:4914   | D00434 |
| Non-interactive | hsa:54878  | D00139 |
| Non-interactive | hsa:1800   | D00216 |
| Non-interactive | hsa:768    | D00963 |
| Non-interactive | hsa:2595   | D01061 |
| Non-interactive | hsa:5033   | D01844 |
| Non-interactive | hsa:1543   | D01715 |
| Non-interactive | hsa:111    | D00283 |
| Non-interactive | hsa:2339   | D01862 |
| Non-interactive | hsa:2180   | D01064 |
| Non-interactive | hsa:18     | D00593 |
| Non-interactive | hsa:31     | D03823 |
| Non-interactive | hsa:56922  | D03899 |
| Non-interactive | hsa:2044   | D01133 |

|                 |            |        |
|-----------------|------------|--------|
| Non-interactive | hsa:1845   | D02418 |
| Non-interactive | hsa:84152  | D01432 |
| Non-interactive | hsa:5138   | D00550 |
| Non-interactive | hsa:2263   | D01690 |
| Non-interactive | hsa:660    | D00813 |
| Non-interactive | hsa:55     | D02008 |
| Non-interactive | hsa:658    | D03736 |
| Non-interactive | hsa:7498   | D02110 |
| Non-interactive | hsa:5148   | D03736 |
| Non-interactive | hsa:495    | D00434 |
| Non-interactive | hsa:5126   | D00969 |
| Non-interactive | hsa:5332   | D00653 |
| Non-interactive | hsa:23236  | D00515 |
| Non-interactive | hsa:5145   | D00283 |
| Non-interactive | hsa:5537   | D00155 |
| Non-interactive | hsa:327    | D03778 |
| Non-interactive | hsa:115    | D03803 |
| Non-interactive | hsa:5156   | D02333 |
| Non-interactive | hsa:109    | D03775 |
| Non-interactive | hsa:30     | D03643 |
| Non-interactive | hsa:5494   | D01397 |
| Non-interactive | hsa:28     | D00434 |
| Non-interactive | hsa:1845   | D03720 |
| Non-interactive | hsa:53938  | D00139 |
| Non-interactive | hsa:218    | D00651 |
| Non-interactive | hsa:5169   | D02556 |
| Non-interactive | hsa:1675   | D01441 |
| Non-interactive | hsa:5494   | D04029 |
| Non-interactive | hsa:377677 | D00902 |
| Non-interactive | hsa:54878  | D00155 |
| Non-interactive | hsa:765    | D03803 |
| Non-interactive | hsa:6716   | D03717 |
| Non-interactive | hsa:115    | D02166 |
| Non-interactive | hsa:84695  | D03741 |
| Non-interactive | hsa:7046   | D02487 |
| Non-interactive | hsa:4860   | D00216 |
| Non-interactive | hsa:5423   | D00813 |
| Non-interactive | hsa:7173   | D04292 |
| Non-interactive | hsa:7010   | D00131 |
| Non-interactive | hsa:64802  | D00018 |
| Non-interactive | hsa:1562   | D01441 |
| Non-interactive | hsa:10327  | D00752 |



|                 |            |        |
|-----------------|------------|--------|
| Non-interactive | hsa:5650   | D02581 |
| Non-interactive | hsa:5646   | D02560 |
| Non-interactive | hsa:1800   | D03735 |
| Non-interactive | hsa:10269  | D00394 |
| Non-interactive | hsa:5148   | D03828 |
| Non-interactive | hsa:2042   | D01211 |
| Non-interactive | hsa:5331   | D00963 |
| Non-interactive | hsa:5831   | D00516 |
| Non-interactive | hsa:3290   | D00884 |
| Non-interactive | hsa:132160 | D00324 |
| Non-interactive | hsa:1890   | D00537 |
| Non-interactive | hsa:55775  | D02581 |
| Non-interactive | hsa:10941  | D00563 |
| Non-interactive | hsa:5144   | D03828 |
| Non-interactive | hsa:79001  | D01688 |
| Non-interactive | hsa:29920  | D03798 |
| Non-interactive | hsa:2639   | D02698 |
| Non-interactive | hsa:3028   | D00225 |
| Non-interactive | hsa:91     | D01765 |
| Non-interactive | hsa:3551   | D00298 |
| Non-interactive | hsa:10549  | D02769 |
| Non-interactive | hsa:1584   | D03728 |
| Non-interactive | hsa:231    | D00900 |
| Non-interactive | hsa:8854   | D01276 |
| Non-interactive | hsa:10667  | D00315 |
| Non-interactive | hsa:54579  | D01027 |
| Non-interactive | hsa:4758   | D02731 |
| Non-interactive | hsa:11266  | D03720 |
| Non-interactive | hsa:10269  | D03012 |
| Non-interactive | hsa:5595   | D02581 |
| Non-interactive | hsa:247    | D03806 |
| Non-interactive | hsa:8854   | D00885 |
| Non-interactive | hsa:5550   | D01862 |
| Non-interactive | hsa:1636   | D02709 |
| Non-interactive | hsa:2064   | D01196 |
| Non-interactive | hsa:9945   | D03077 |
| Non-interactive | hsa:313    | D00218 |
| Non-interactive | hsa:5321   | D03882 |
| Non-interactive | hsa:686    | D00208 |
| Non-interactive | hsa:57016  | D03689 |
| Non-interactive | hsa:8529   | D02769 |
| Non-interactive | hsa:284541 | D00651 |

|                 |            |        |
|-----------------|------------|--------|
| Non-interactive | hsa:1645   | D00887 |
| Non-interactive | hsa:11221  | D00342 |
| Non-interactive | hsa:4593   | D03736 |
| Non-interactive | hsa:1553   | D01064 |
| Non-interactive | hsa:2046   | D00550 |
| Non-interactive | hsa:93     | D00630 |
| Non-interactive | hsa:3615   | D00448 |
| Non-interactive | hsa:51095  | D00107 |
| Non-interactive | hsa:54878  | D01432 |
| Non-interactive | hsa:224    | D00781 |
| Non-interactive | hsa:129807 | D01688 |
| Non-interactive | hsa:189    | D00622 |
| Non-interactive | hsa:1537   | D00398 |
| Non-interactive | hsa:5141   | D04025 |
| Non-interactive | hsa:2155   | D02580 |
| Non-interactive | hsa:1376   | D01688 |
| Non-interactive | hsa:53     | D03716 |
| Non-interactive | hsa:2064   | D03758 |
| Non-interactive | hsa:93650  | D00294 |
| Non-interactive | hsa:108    | D03899 |
| Non-interactive | hsa:1565   | D03826 |
| Non-interactive | hsa:5601   | D00893 |
| Non-interactive | hsa:6241   | D01690 |
| Non-interactive | hsa:128853 | D03826 |
| Non-interactive | hsa:5422   | D02451 |
| Non-interactive | hsa:279    | D02193 |
| Non-interactive | hsa:5836   | D00449 |
| Non-interactive | hsa:5494   | D03743 |
| Non-interactive | hsa:8622   | D01332 |
| Non-interactive | hsa:64850  | D00196 |
| Non-interactive | hsa:3614   | D03350 |
| Non-interactive | hsa:11221  | D02258 |
| Non-interactive | hsa:2185   | D00120 |
| Non-interactive | hsa:34     | D01211 |
| Non-interactive | hsa:5141   | D02110 |
| Non-interactive | hsa:111    | D00139 |
| Non-interactive | hsa:5140   | D02214 |
| Non-interactive | hsa:63036  | D00391 |
| Non-interactive | hsa:5096   | D01866 |
| Non-interactive | hsa:4190   | D00005 |
| Non-interactive | hsa:5331   | D01866 |
| Non-interactive | hsa:84532  | D01973 |

|                 |            |        |
|-----------------|------------|--------|
| Non-interactive | hsa:1969   | D00884 |
| Non-interactive | hsa:9023   | D01973 |
| Non-interactive | hsa:4191   | D03899 |
| Non-interactive | hsa:107    | D00437 |
| Non-interactive | hsa:3718   | D00530 |
| Non-interactive | hsa:5151   | D02418 |
| Non-interactive | hsa:128853 | D00208 |
| Non-interactive | hsa:55811  | D03767 |
| Non-interactive | hsa:1848   | D02258 |
| Non-interactive | hsa:2261   | D03823 |
| Non-interactive | hsa:4129   | D04031 |
| Non-interactive | hsa:132160 | D00620 |
| Non-interactive | hsa:10188  | D03720 |
| Non-interactive | hsa:10667  | D00285 |
| Non-interactive | hsa:84706  | D04031 |
| Non-interactive | hsa:7366   | D03440 |
| Non-interactive | hsa:9601   | D02709 |
| Non-interactive | hsa:5650   | D00630 |
| Non-interactive | hsa:4919   | D01582 |
| Non-interactive | hsa:64600  | D00127 |
| Non-interactive | hsa:3034   | D00125 |
| Non-interactive | hsa:1844   | D00208 |
| Non-interactive | hsa:57665  | D00893 |
| Non-interactive | hsa:5142   | D00622 |
| Non-interactive | hsa:2161   | D03758 |
| Non-interactive | hsa:26279  | D00120 |
| Non-interactive | hsa:54490  | D00753 |
| Non-interactive | hsa:3990   | D01565 |
| Non-interactive | hsa:767    | D00593 |
| Non-interactive | hsa:5122   | D00364 |
| Non-interactive | hsa:3612   | D00218 |
| Non-interactive | hsa:51205  | D03882 |
| Non-interactive | hsa:2677   | D01862 |
| Non-interactive | hsa:8622   | D00805 |
| Non-interactive | hsa:2639   | D01180 |
| Non-interactive | hsa:94009  | D00298 |
| Non-interactive | hsa:9023   | D00298 |
| Non-interactive | hsa:768    | D00198 |
| Non-interactive | hsa:189    | D01974 |
| Non-interactive | hsa:5516   | D00394 |
| Non-interactive | hsa:114    | D00434 |
| Non-interactive | hsa:53938  | D01718 |

|                 |            |        |
|-----------------|------------|--------|
| Non-interactive | hsa:7294   | D01240 |
| Non-interactive | hsa:29920  | D00423 |
| Non-interactive | hsa:5322   | D02110 |
| Non-interactive | hsa:1267   | D00325 |
| Non-interactive | hsa:6646   | D03751 |
| Non-interactive | hsa:29920  | D00127 |
| Non-interactive | hsa:6725   | D00423 |
| Non-interactive | hsa:670    | D03736 |
| Non-interactive | hsa:9388   | D01984 |
| Non-interactive | hsa:3939   | D01885 |
| Non-interactive | hsa:224    | D00364 |
| Non-interactive | hsa:4282   | D00630 |
| Non-interactive | hsa:5150   | D02418 |
| Non-interactive | hsa:8972   | D00893 |
| Non-interactive | hsa:762    | D00196 |
| Non-interactive | hsa:5049   | D02731 |
| Non-interactive | hsa:3988   | D00414 |
| Non-interactive | hsa:683    | D00252 |
| Non-interactive | hsa:54576  | D01984 |
| Non-interactive | hsa:761    | D01397 |
| Non-interactive | hsa:3001   | D04025 |
| Non-interactive | hsa:115    | D02418 |
| Non-interactive | hsa:3815   | D01565 |
| Non-interactive | hsa:54577  | D00753 |
| Non-interactive | hsa:5625   | D02194 |
| Non-interactive | hsa:63904  | D02441 |
| Non-interactive | hsa:128    | D02698 |
| Non-interactive | hsa:1800   | D00515 |
| Non-interactive | hsa:7297   | D00771 |
| Non-interactive | hsa:2051   | D00963 |
| Non-interactive | hsa:34     | D02166 |
| Non-interactive | hsa:3028   | D01240 |
| Non-interactive | hsa:64802  | D01918 |
| Non-interactive | hsa:586    | D00125 |
| Non-interactive | hsa:199974 | D02258 |
| Non-interactive | hsa:81579  | D01367 |
| Non-interactive | hsa:80339  | D01911 |
| Non-interactive | hsa:10056  | D00342 |
| Non-interactive | hsa:3291   | D03882 |
| Non-interactive | hsa:2185   | D00516 |
| Non-interactive | hsa:5479   | D00208 |
| Non-interactive | hsa:2322   | D00070 |

|                 |            |        |
|-----------------|------------|--------|
| Non-interactive | hsa:635    | D03806 |
| Non-interactive | hsa:7298   | D00324 |
| Non-interactive | hsa:4942   | D00002 |
| Non-interactive | hsa:52     | D00650 |
| Non-interactive | hsa:6300   | D01223 |
| Non-interactive | hsa:1537   | D00655 |
| Non-interactive | hsa:2064   | D00752 |
| Non-interactive | hsa:3817   | D02698 |
| Non-interactive | hsa:5481   | D02328 |
| Non-interactive | hsa:5601   | D00131 |
| Non-interactive | hsa:1675   | D03012 |
| Non-interactive | hsa:5597   | D01828 |
| Non-interactive | hsa:4920   | D00655 |
| Non-interactive | hsa:2638   | D01974 |
| Non-interactive | hsa:10720  | D04031 |
| Non-interactive | hsa:5599   | D03735 |
| Non-interactive | hsa:5499   | D02229 |
| Non-interactive | hsa:116447 | D02581 |
| Non-interactive | hsa:3291   | D00892 |
| Non-interactive | hsa:54578  | D00359 |
| Non-interactive | hsa:80824  | D00963 |
| Non-interactive | hsa:132    | D03735 |
| Non-interactive | hsa:5126   | D00593 |
| Non-interactive | hsa:29968  | D00448 |
| Non-interactive | hsa:1056   | D02229 |
| Non-interactive | hsa:63036  | D01977 |
| Non-interactive | hsa:2766   | D00005 |
| Non-interactive | hsa:26279  | D01164 |
| Non-interactive | hsa:50484  | D00813 |
| Non-interactive | hsa:5327   | D00434 |
| Non-interactive | hsa:3718   | D00563 |
| Non-interactive | hsa:5140   | D00198 |
| Non-interactive | hsa:4200   | D03741 |
| Non-interactive | hsa:23430  | D02110 |
| Non-interactive | hsa:2155   | D02556 |
| Non-interactive | hsa:2185   | D00889 |
| Non-interactive | hsa:780    | D03828 |
| Non-interactive | hsa:53     | D03743 |
| Non-interactive | hsa:23436  | D03218 |
| Non-interactive | hsa:5122   | D00752 |
| Non-interactive | hsa:1850   | D04292 |
| Non-interactive | hsa:6714   | D00656 |

|                 |            |        |
|-----------------|------------|--------|
| Non-interactive | hsa:2147   | D00651 |
| Non-interactive | hsa:5754   | D00655 |
| Non-interactive | hsa:2242   | D03882 |
| Non-interactive | hsa:125    | D00454 |
| Non-interactive | hsa:3939   | D00488 |
| Non-interactive | hsa:657    | D00563 |
| Non-interactive | hsa:8654   | D00283 |
| Non-interactive | hsa:240    | D01275 |
| Non-interactive | hsa:645    | D00654 |
| Non-interactive | hsa:28227  | D00538 |
| Non-interactive | hsa:2066   | D00900 |
| Non-interactive | hsa:3614   | D01223 |
| Non-interactive | hsa:116447 | D01370 |
| Non-interactive | hsa:5320   | D01844 |
| Non-interactive | hsa:2263   | D01918 |
| Non-interactive | hsa:7371   | D00656 |
| Non-interactive | hsa:1849   | D00550 |
| Non-interactive | hsa:10279  | D01432 |
| Non-interactive | hsa:1565   | D00018 |
| Non-interactive | hsa:5053   | D01180 |
| Non-interactive | hsa:5148   | D00002 |
| Non-interactive | hsa:1200   | D00155 |
| Non-interactive | hsa:5096   | D00656 |
| Non-interactive | hsa:4758   | D02655 |
| Non-interactive | hsa:476    | D00753 |
| Non-interactive | hsa:834    | D01211 |
| Non-interactive | hsa:64816  | D00902 |
| Non-interactive | hsa:5475   | D00550 |
| Non-interactive | hsa:25796  | D03012 |
| Non-interactive | hsa:5470   | D00620 |
| Non-interactive | hsa:7298   | D03899 |
| Non-interactive | hsa:5608   | D03765 |
| Non-interactive | hsa:2746   | D03899 |
| Non-interactive | hsa:4594   | D00656 |
| Non-interactive | hsa:8435   | D03218 |
| Non-interactive | hsa:2950   | D02166 |
| Non-interactive | hsa:326625 | D00187 |
| Non-interactive | hsa:1545   | D00656 |
| Non-interactive | hsa:762    | D00141 |
| Non-interactive | hsa:3028   | D02110 |
| Non-interactive | hsa:4919   | D01767 |
| Non-interactive | hsa:7075   | D03816 |

|                 |            |        |
|-----------------|------------|--------|
| Non-interactive | hsa:1847   | D00892 |
| Non-interactive | hsa:130399 | D01027 |
| Non-interactive | hsa:3283   | D00218 |
| Non-interactive | hsa:768    | D01275 |
| Non-interactive | hsa:1376   | D02731 |
| Non-interactive | hsa:2042   | D03720 |
| Non-interactive | hsa:7367   | D00652 |
| Non-interactive | hsa:63036  | D00414 |
| Non-interactive | hsa:4353   | D00900 |
| Non-interactive | hsa:4128   | D01688 |
| Non-interactive | hsa:1557   | D00771 |
| Non-interactive | hsa:55312  | D03826 |
| Non-interactive | hsa:4145   | D01718 |
| Non-interactive | hsa:1723   | D00218 |
| Non-interactive | hsa:4058   | D00892 |
| Non-interactive | hsa:2159   | D03806 |
| Non-interactive | hsa:5646   | D00187 |
| Non-interactive | hsa:270    | D01180 |
| Non-interactive | hsa:7173   | D02194 |
| Non-interactive | hsa:5601   | D00651 |
| Non-interactive | hsa:64902  | D03440 |
| Non-interactive | hsa:1633   | D00005 |
| Non-interactive | hsa:4191   | D00315 |
| Non-interactive | hsa:130399 | D00630 |
| Non-interactive | hsa:5340   | D00070 |
| Non-interactive | hsa:5141   | D03736 |
| Non-interactive | hsa:5337   | D00658 |
| Non-interactive | hsa:1584   | D00018 |
| Non-interactive | hsa:5407   | D02166 |
| Non-interactive | hsa:5860   | D02194 |
| Non-interactive | hsa:1728   | D00781 |
| Non-interactive | hsa:1586   | D01578 |
| Non-interactive | hsa:1586   | D00449 |
| Non-interactive | hsa:11202  | D01825 |
| Non-interactive | hsa:1445   | D03720 |
| Non-interactive | hsa:1545   | D00630 |
| Non-interactive | hsa:5053   | D02214 |
| Non-interactive | hsa:501    | D00537 |
| Non-interactive | hsa:1845   | D01828 |
| Non-interactive | hsa:6897   | D00813 |
| Non-interactive | hsa:6300   | D01180 |
| Non-interactive | hsa:5604   | D01715 |

|                 |            |        |
|-----------------|------------|--------|
| Non-interactive | hsa:1579   | D02441 |
| Non-interactive | hsa:54579  | D02110 |
| Non-interactive | hsa:5096   | D00515 |
| Non-interactive | hsa:25796  | D00488 |
| Non-interactive | hsa:116447 | D04025 |
| Non-interactive | hsa:1990   | D02487 |
| Non-interactive | hsa:2328   | D00771 |
| Non-interactive | hsa:2936   | D03735 |
| Non-interactive | hsa:377677 | D03012 |
| Non-interactive | hsa:7535   | D00885 |
| Non-interactive | hsa:2045   | D00537 |
| Non-interactive | hsa:2766   | D01441 |
| Non-interactive | hsa:1553   | D00889 |
| Non-interactive | hsa:90     | D01240 |
| Non-interactive | hsa:1363   | D03720 |
| Non-interactive | hsa:1845   | D03805 |
| Non-interactive | hsa:3817   | D01397 |
| Non-interactive | hsa:6416   | D01578 |
| Non-interactive | hsa:5742   | D00325 |
| Non-interactive | hsa:5499   | D01397 |
| Non-interactive | hsa:132160 | D00654 |
| Non-interactive | hsa:5516   | D00884 |
| Non-interactive | hsa:217    | D00155 |
| Non-interactive | hsa:686    | D04025 |
| Non-interactive | hsa:3615   | D00155 |
| Non-interactive | hsa:2321   | D00538 |
| Non-interactive | hsa:2321   | D02560 |
| Non-interactive | hsa:6098   | D00752 |
| Non-interactive | hsa:54     | D00656 |
| Non-interactive | hsa:10720  | D01332 |
| Non-interactive | hsa:56922  | D00651 |
| Non-interactive | hsa:5499   | D00530 |
| Non-interactive | hsa:2235   | D00252 |
| Non-interactive | hsa:151531 | D01915 |
| Non-interactive | hsa:10295  | D00423 |
| Non-interactive | hsa:5331   | D03803 |
| Non-interactive | hsa:3292   | D00188 |
| Non-interactive | hsa:133121 | D01061 |
| Non-interactive | hsa:1573   | D00005 |
| Non-interactive | hsa:5754   | D03717 |
| Non-interactive | hsa:2806   | D01715 |
| Non-interactive | hsa:4058   | D02258 |



|                 |            |        |
|-----------------|------------|--------|
| Non-interactive | hsa:5600   | D01196 |
| Non-interactive | hsa:5831   | D03758 |
| Non-interactive | hsa:2065   | D02214 |
| Non-interactive | hsa:131    | D00437 |
| Non-interactive | hsa:5319   | D01275 |
| Non-interactive | hsa:5141   | D00654 |
| Non-interactive | hsa:5515   | D00900 |
| Non-interactive | hsa:8288   | D00141 |
| Non-interactive | hsa:2746   | D02769 |
| Non-interactive | hsa:285220 | D00651 |
| Non-interactive | hsa:327    | D01240 |
| Non-interactive | hsa:3615   | D01256 |
| Non-interactive | hsa:7372   | D01240 |
| Non-interactive | hsa:10846  | D00283 |
| Non-interactive | hsa:5837   | D02229 |
| Non-interactive | hsa:64902  | D03717 |
| Non-interactive | hsa:7015   | D00120 |
| Non-interactive | hsa:5145   | D00630 |
| Non-interactive | hsa:5478   | D00005 |
| Non-interactive | hsa:35     | D00892 |
| Non-interactive | hsa:7054   | D01432 |
| Non-interactive | hsa:25796  | D00537 |
| Non-interactive | hsa:49     | D00658 |
| Non-interactive | hsa:2160   | D03736 |
| Non-interactive | hsa:11343  | D03765 |
| Non-interactive | hsa:55811  | D00623 |
| Non-interactive | hsa:9023   | D03805 |
| Non-interactive | hsa:2045   | D02487 |
| Non-interactive | hsa:4916   | D00216 |
| Non-interactive | hsa:5319   | D00298 |
| Non-interactive | hsa:1725   | D03816 |
| Non-interactive | hsa:5494   | D02368 |
| Non-interactive | hsa:54579  | D03751 |
| Non-interactive | hsa:1593   | D01441 |
| Non-interactive | hsa:270    | D00283 |
| Non-interactive | hsa:1571   | D00902 |
| Non-interactive | hsa:2597   | D03767 |
| Non-interactive | hsa:5747   | D01842 |
| Non-interactive | hsa:79001  | D01223 |
| Non-interactive | hsa:4023   | D03828 |
| Non-interactive | hsa:54575  | D01441 |
| Non-interactive | hsa:5052   | D00141 |

|                 |            |        |
|-----------------|------------|--------|
| Non-interactive | hsa:107    | D04025 |
| Non-interactive | hsa:1178   | D02560 |
| Non-interactive | hsa:6652   | D03758 |
| Non-interactive | hsa:3817   | D00391 |
| Non-interactive | hsa:11266  | D02214 |
| Non-interactive | hsa:6609   | D00900 |
| Non-interactive | hsa:284541 | D03350 |
| Non-interactive | hsa:5836   | D01765 |
| Non-interactive | hsa:129807 | D03728 |
| Non-interactive | hsa:6300   | D03899 |
| Non-interactive | hsa:5646   | D02756 |
| Non-interactive | hsa:1576   | D00623 |
| Non-interactive | hsa:1572   | D01196 |
| Non-interactive | hsa:5523   | D00225 |
| Non-interactive | hsa:4353   | D03735 |
| Non-interactive | hsa:1728   | D00203 |
| Non-interactive | hsa:2193   | D01565 |
| Non-interactive | hsa:7174   | D00005 |
| Non-interactive | hsa:1553   | D00449 |
| Non-interactive | hsa:1548   | D03805 |
| Non-interactive | hsa:2880   | D03728 |
| Non-interactive | hsa:1848   | D02418 |
| Non-interactive | hsa:4548   | D01432 |
| Non-interactive | hsa:1621   | D00593 |
| Non-interactive | hsa:5096   | D00449 |
| Non-interactive | hsa:55811  | D03775 |
| Non-interactive | hsa:590    | D04292 |
| Non-interactive | hsa:129807 | D02709 |
| Non-interactive | hsa:5422   | D03735 |
| Non-interactive | hsa:11072  | D00187 |
| Non-interactive | hsa:1633   | D01432 |
| Non-interactive | hsa:5330   | D02756 |
| Non-interactive | hsa:3283   | D00283 |
| Non-interactive | hsa:6646   | D00454 |
| Non-interactive | hsa:111    | D03689 |
| Non-interactive | hsa:5605   | D01915 |
| Non-interactive | hsa:28227  | D00630 |
| Non-interactive | hsa:1636   | D00141 |
| Non-interactive | hsa:5126   | D00127 |
| Non-interactive | hsa:1384   | D01565 |
| Non-interactive | hsa:1445   | D00449 |
| Non-interactive | hsa:240    | D01180 |

|                 |            |        |
|-----------------|------------|--------|
| Non-interactive | hsa:84152  | D01862 |
| Non-interactive | hsa:64600  | D02008 |
| Non-interactive | hsa:5422   | D00454 |
| Non-interactive | hsa:3141   | D00653 |
| Non-interactive | hsa:613    | D02655 |
| Non-interactive | hsa:7365   | D03758 |
| Non-interactive | hsa:1969   | D03728 |
| Non-interactive | hsa:8555   | D00142 |
| Non-interactive | hsa:55811  | D00656 |
| Non-interactive | hsa:55     | D02709 |
| Non-interactive | hsa:339221 | D00187 |
| Non-interactive | hsa:2041   | D02115 |
| Non-interactive | hsa:7294   | D01715 |
| Non-interactive | hsa:5049   | D01974 |
| Non-interactive | hsa:3033   | D00141 |
| Non-interactive | hsa:3991   | D03826 |
| Non-interactive | hsa:5335   | D00752 |
| Non-interactive | hsa:11202  | D02168 |
| Non-interactive | hsa:25796  | D01842 |
| Non-interactive | hsa:2235   | D01256 |
| Non-interactive | hsa:2159   | D01119 |
| Non-interactive | hsa:4353   | D00094 |
| Non-interactive | hsa:124    | D00434 |
| Non-interactive | hsa:2185   | D00519 |
| Non-interactive | hsa:761    | D03350 |
| Non-interactive | hsa:476    | D00563 |
| Non-interactive | hsa:2597   | D00328 |
| Non-interactive | hsa:7054   | D00398 |
| Non-interactive | hsa:4051   | D00127 |
| Non-interactive | hsa:339221 | D00218 |
| Non-interactive | hsa:6098   | D03728 |
| Non-interactive | hsa:1595   | D00218 |
| Non-interactive | hsa:1543   | D02375 |
| Non-interactive | hsa:7301   | D00947 |
| Non-interactive | hsa:10461  | D01264 |
| Non-interactive | hsa:1621   | D03823 |
| Non-interactive | hsa:5516   | D00781 |
| Non-interactive | hsa:1584   | D01582 |
| Non-interactive | hsa:1200   | D00516 |
| Non-interactive | hsa:108    | D01984 |
| Non-interactive | hsa:5322   | D01767 |
| Non-interactive | hsa:1844   | D03778 |

|                 |            |        |
|-----------------|------------|--------|
| Non-interactive | hsa:54490  | D02655 |
| Non-interactive | hsa:8529   | D03440 |
| Non-interactive | hsa:513    | D00752 |
| Non-interactive | hsa:2673   | D00781 |
| Non-interactive | hsa:6799   | D02168 |
| Non-interactive | hsa:686    | D01264 |
| Non-interactive | hsa:6609   | D00437 |
| Non-interactive | hsa:11266  | D00423 |
| Non-interactive | hsa:6897   | D03710 |
| Non-interactive | hsa:5604   | D00203 |
| Non-interactive | hsa:5169   | D01866 |
| Non-interactive | hsa:2261   | D00387 |
| Non-interactive | hsa:1849   | D00148 |
| Non-interactive | hsa:3815   | D00488 |
| Non-interactive | hsa:5145   | D01441 |
| Non-interactive | hsa:223    | D00630 |
| Non-interactive | hsa:32     | D03736 |
| Non-interactive | hsa:11202  | D02560 |
| Non-interactive | hsa:4486   | D01907 |
| Non-interactive | hsa:6713   | D00018 |
| Non-interactive | hsa:2135   | D00965 |
| Non-interactive | hsa:4233   | D03803 |
| Non-interactive | hsa:134510 | D01885 |
| Non-interactive | hsa:50940  | D00141 |
| Non-interactive | hsa:18     | D03826 |
| Non-interactive | hsa:5600   | D03743 |
| Non-interactive | hsa:5743   | D00593 |
| Non-interactive | hsa:128    | D00537 |
| Non-interactive | hsa:2673   | D00893 |
| Non-interactive | hsa:1576   | D00530 |
| Non-interactive | hsa:10858  | D02756 |
| Non-interactive | hsa:7083   | D00893 |
| Non-interactive | hsa:6240   | D03734 |
| Non-interactive | hsa:4915   | D00753 |
| Non-interactive | hsa:1312   | D00622 |
| Non-interactive | hsa:1850   | D01885 |
| Non-interactive | hsa:54578  | D02042 |
| Non-interactive | hsa:109    | D00455 |
| Non-interactive | hsa:11343  | D02451 |
| Non-interactive | hsa:9955   | D00563 |
| Non-interactive | hsa:1573   | D00516 |
| Non-interactive | hsa:377677 | D00963 |

|                 |            |        |
|-----------------|------------|--------|
| Non-interactive | hsa:3034   | D00655 |
| Non-interactive | hsa:27032  | D03805 |
| Non-interactive | hsa:3295   | D03728 |
| Non-interactive | hsa:5407   | D01973 |
| Non-interactive | hsa:5536   | D01690 |
| Non-interactive | hsa:6259   | D00107 |
| Non-interactive | hsa:326625 | D00969 |
| Non-interactive | hsa:2677   | D03758 |
| Non-interactive | hsa:2180   | D03689 |
| Non-interactive | hsa:54     | D00285 |
| Non-interactive | hsa:1636   | D01367 |
| Non-interactive | hsa:11266  | D03751 |
| Non-interactive | hsa:5834   | D00198 |
| Non-interactive | hsa:10846  | D02556 |
| Non-interactive | hsa:3932   | D04029 |
| Non-interactive | hsa:55359  | D00596 |
| Non-interactive | hsa:7525   | D00593 |
| Non-interactive | hsa:10327  | D00884 |
| Non-interactive | hsa:10188  | D00218 |
| Non-interactive | hsa:1843   | D02556 |
| Non-interactive | hsa:4920   | D02214 |
| Non-interactive | hsa:4145   | D03440 |
| Non-interactive | hsa:2548   | D03350 |
| Non-interactive | hsa:84152  | D02580 |
| Non-interactive | hsa:10825  | D00359 |
| Non-interactive | hsa:43     | D03734 |
| Non-interactive | hsa:1431   | D02769 |
| Non-interactive | hsa:6416   | D00448 |
| Non-interactive | hsa:4758   | D00120 |
| Non-interactive | hsa:771    | D00454 |
| Non-interactive | hsa:30814  | D03826 |
| Non-interactive | hsa:51207  | D03734 |
| Non-interactive | hsa:586    | D01828 |
| Non-interactive | hsa:51181  | D01907 |
| Non-interactive | hsa:5335   | D00889 |
| Non-interactive | hsa:2595   | D00434 |
| Non-interactive | hsa:91039  | D01984 |
| Non-interactive | hsa:7298   | D00252 |
| Non-interactive | hsa:13     | D00454 |
| Non-interactive | hsa:270    | D03826 |
| Non-interactive | hsa:54658  | D02214 |
| Non-interactive | hsa:5516   | D01767 |

|                 |           |        |
|-----------------|-----------|--------|
| Non-interactive | hsa:35    | D03077 |
| Non-interactive | hsa:5336  | D00107 |
| Non-interactive | hsa:84532 | D01984 |
| Non-interactive | hsa:5144  | D01907 |
| Non-interactive | hsa:1589  | D02731 |
| Non-interactive | hsa:6416  | D02560 |
| Non-interactive | hsa:51172 | D01885 |
| Non-interactive | hsa:4051  | D00434 |
| Non-interactive | hsa:8940  | D00225 |
| Non-interactive | hsa:5607  | D00771 |
| Non-interactive | hsa:10295 | D03899 |
| Non-interactive | hsa:5594  | D00530 |
| Non-interactive | hsa:1890  | D03741 |
| Non-interactive | hsa:5331  | D01180 |
| Non-interactive | hsa:761   | D01370 |
| Non-interactive | hsa:2936  | D02769 |
| Non-interactive | hsa:6714  | D02418 |
| Non-interactive | hsa:23035 | D00125 |
| Non-interactive | hsa:3712  | D00141 |
| Non-interactive | hsa:54490 | D00070 |
| Non-interactive | hsa:5335  | D01441 |
| Non-interactive | hsa:5407  | D00437 |
| Non-interactive | hsa:246   | D00622 |
| Non-interactive | hsa:64087 | D00753 |
| Non-interactive | hsa:1432  | D02756 |
| Non-interactive | hsa:8398  | D00448 |
| Non-interactive | hsa:327   | D01264 |
| Non-interactive | hsa:10188 | D00630 |
| Non-interactive | hsa:11266 | D00094 |
| Non-interactive | hsa:9023  | D01164 |
| Non-interactive | hsa:3716  | D00889 |
| Non-interactive | hsa:1645  | D01974 |
| Non-interactive | hsa:2746  | D03728 |
| Non-interactive | hsa:2639  | D00364 |
| Non-interactive | hsa:10188 | D00187 |
| Non-interactive | hsa:3988  | D00437 |
| Non-interactive | hsa:4329  | D00454 |
| Non-interactive | hsa:128   | D00463 |
| Non-interactive | hsa:683   | D01844 |
| Non-interactive | hsa:30833 | D01844 |
| Non-interactive | hsa:2048  | D02756 |
| Non-interactive | hsa:1588  | D01256 |

|                 |            |        |
|-----------------|------------|--------|
| Non-interactive | hsa:5340   | D00651 |
| Non-interactive | hsa:1675   | D00364 |
| Non-interactive | hsa:7174   | D03751 |
| Non-interactive | hsa:5322   | D00533 |
| Non-interactive | hsa:11072  | D00537 |
| Non-interactive | hsa:1548   | D01977 |
| Non-interactive | hsa:6716   | D00965 |
| Non-interactive | hsa:3295   | D00538 |
| Non-interactive | hsa:247    | D04031 |
| Non-interactive | hsa:51181  | D02333 |
| Non-interactive | hsa:29920  | D00887 |
| Non-interactive | hsa:216    | D03735 |
| Non-interactive | hsa:2066   | D01397 |
| Non-interactive | hsa:2049   | D01918 |
| Non-interactive | hsa:128853 | D03218 |
| Non-interactive | hsa:3416   | D01718 |
| Non-interactive | hsa:476    | D00155 |
| Non-interactive | hsa:29968  | D01432 |
| Non-interactive | hsa:124    | D03736 |
| Non-interactive | hsa:5159   | D00002 |
| Non-interactive | hsa:25796  | D00969 |
| Non-interactive | hsa:658    | D00620 |
| Non-interactive | hsa:2232   | D04292 |
| Non-interactive | hsa:5595   | D01397 |
| Non-interactive | hsa:5536   | D01180 |
| Non-interactive | hsa:36     | D00294 |
| Non-interactive | hsa:444    | D00139 |
| Non-interactive | hsa:5126   | D00885 |
| Non-interactive | hsa:2263   | D00752 |
| Non-interactive | hsa:238    | D00018 |
| Non-interactive | hsa:5158   | D00285 |
| Non-interactive | hsa:29785  | D00650 |
| Non-interactive | hsa:55359  | D00630 |
| Non-interactive | hsa:116447 | D03758 |
| Non-interactive | hsa:22843  | D02709 |
| Non-interactive | hsa:8435   | D01688 |
| Non-interactive | hsa:1033   | D00563 |
| Non-interactive | hsa:1555   | D01027 |
| Non-interactive | hsa:51     | D00622 |
| Non-interactive | hsa:5338   | D01397 |
| Non-interactive | hsa:5657   | D03751 |
| Non-interactive | hsa:5444   | D01974 |

|                 |            |        |
|-----------------|------------|--------|
| Non-interactive | hsa:5501   | D02451 |
| Non-interactive | hsa:2638   | D03798 |
| Non-interactive | hsa:5516   | D00655 |
| Non-interactive | hsa:5979   | D00002 |
| Non-interactive | hsa:586    | D00142 |
| Non-interactive | hsa:10825  | D02258 |
| Non-interactive | hsa:5624   | D00900 |
| Non-interactive | hsa:1852   | D00515 |
| Non-interactive | hsa:761    | D03712 |
| Non-interactive | hsa:4759   | D02581 |
| Non-interactive | hsa:5423   | D03738 |
| Non-interactive | hsa:1621   | D01264 |
| Non-interactive | hsa:52     | D00142 |
| Non-interactive | hsa:1586   | D02560 |
| Non-interactive | hsa:100    | D00324 |
| Non-interactive | hsa:9023   | D00455 |
| Non-interactive | hsa:29785  | D00298 |
| Non-interactive | hsa:5146   | D00515 |
| Non-interactive | hsa:2880   | D00005 |
| Non-interactive | hsa:50     | D00515 |
| Non-interactive | hsa:2534   | D00131 |
| Non-interactive | hsa:107    | D03823 |
| Non-interactive | hsa:51645  | D00325 |
| Non-interactive | hsa:1846   | D01688 |
| Non-interactive | hsa:260293 | D02769 |
| Non-interactive | hsa:780    | D03736 |
| Non-interactive | hsa:1360   | D02655 |
| Non-interactive | hsa:760    | D00884 |
| Non-interactive | hsa:32     | D00391 |
| Non-interactive | hsa:4482   | D03440 |
| Non-interactive | hsa:3551   | D01367 |
| Non-interactive | hsa:3141   | D00437 |
| Non-interactive | hsa:84532  | D02258 |
| Non-interactive | hsa:657    | D03077 |
| Non-interactive | hsa:109    | D00448 |
| Non-interactive | hsa:4129   | D00387 |
| Non-interactive | hsa:23035  | D03788 |
| Non-interactive | hsa:64850  | D00315 |
| Non-interactive | hsa:1806   | D00398 |
| Non-interactive | hsa:84618  | D00127 |
| Non-interactive | hsa:63904  | D02168 |
| Non-interactive | hsa:6416   | D00285 |



|                 |            |        |
|-----------------|------------|--------|
| Non-interactive | hsa:93650  | D03882 |
| Non-interactive | hsa:5320   | D00155 |
| Non-interactive | hsa:7083   | D00538 |
| Non-interactive | hsa:327    | D00620 |
| Non-interactive | hsa:6716   | D02110 |
| Non-interactive | hsa:695    | D00216 |
| Non-interactive | hsa:5740   | D00902 |
| Non-interactive | hsa:4058   | D03440 |
| Non-interactive | hsa:1376   | D00394 |
| Non-interactive | hsa:5495   | D00902 |
| Non-interactive | hsa:1849   | D02580 |
| Non-interactive | hsa:4145   | D00298 |
| Non-interactive | hsa:686    | D00187 |
| Non-interactive | hsa:5834   | D03775 |
| Non-interactive | hsa:590    | D03717 |
| Non-interactive | hsa:1573   | D00813 |
| Non-interactive | hsa:5501   | D01907 |
| Non-interactive | hsa:4919   | D03712 |
| Non-interactive | hsa:5479   | D02451 |
| Non-interactive | hsa:5167   | D01911 |
| Non-interactive | hsa:5445   | D01370 |
| Non-interactive | hsa:2322   | D00884 |
| Non-interactive | hsa:8435   | D04024 |
| Non-interactive | hsa:8836   | D01885 |
| Non-interactive | hsa:63036  | D03823 |
| Non-interactive | hsa:50     | D02375 |
| Non-interactive | hsa:2193   | D01441 |
| Non-interactive | hsa:5754   | D00537 |
| Non-interactive | hsa:84171  | D00753 |
| Non-interactive | hsa:134510 | D03736 |
| Non-interactive | hsa:247    | D03765 |
| Non-interactive | hsa:2260   | D03758 |
| Non-interactive | hsa:94009  | D02556 |
| Non-interactive | hsa:5049   | D00414 |
| Non-interactive | hsa:2155   | D00324 |
| Non-interactive | hsa:57176  | D01907 |
| Non-interactive | hsa:4048   | D00813 |
| Non-interactive | hsa:8555   | D00423 |
| Non-interactive | hsa:52     | D00519 |
| Non-interactive | hsa:51004  | D03738 |
| Non-interactive | hsa:354    | D01984 |
| Non-interactive | hsa:5596   | D03716 |

|                 |            |        |
|-----------------|------------|--------|
| Non-interactive | hsa:6714   | D02173 |
| Non-interactive | hsa:52     | D02194 |
| Non-interactive | hsa:218    | D01915 |
| Non-interactive | hsa:8854   | D00324 |
| Non-interactive | hsa:3551   | D02418 |
| Non-interactive | hsa:5052   | D02368 |
| Non-interactive | hsa:10935  | D00656 |
| Non-interactive | hsa:5599   | D03899 |
| Non-interactive | hsa:5321   | D01844 |
| Non-interactive | hsa:377677 | D02756 |
| Non-interactive | hsa:107    | D00434 |
| Non-interactive | hsa:10188  | D00771 |
| Non-interactive | hsa:5601   | D02368 |
| Non-interactive | hsa:313    | D01256 |
| Non-interactive | hsa:7957   | D00969 |
| Non-interactive | hsa:10269  | D03710 |
| Non-interactive | hsa:85313  | D00567 |
| Non-interactive | hsa:84618  | D02581 |
| Non-interactive | hsa:5169   | D00148 |
| Non-interactive | hsa:1991   | D03787 |
| Non-interactive | hsa:6898   | D00752 |
| Non-interactive | hsa:25     | D00005 |
| Non-interactive | hsa:150290 | D02731 |
| Non-interactive | hsa:495    | D01977 |
| Non-interactive | hsa:10747  | D00620 |
| Non-interactive | hsa:90     | D02042 |
| Non-interactive | hsa:1562   | D00463 |
| Non-interactive | hsa:10825  | D00753 |
| Non-interactive | hsa:1562   | D01164 |
| Non-interactive | hsa:23236  | D03350 |
| Non-interactive | hsa:5523   | D01690 |
| Non-interactive | hsa:5603   | D00963 |
| Non-interactive | hsa:5646   | D00454 |
| Non-interactive | hsa:51181  | D04292 |
| Non-interactive | hsa:2936   | D00805 |
| Non-interactive | hsa:3416   | D01918 |
| Non-interactive | hsa:2339   | D00622 |
| Non-interactive | hsa:7378   | D00045 |
| Non-interactive | hsa:6609   | D03816 |
| Non-interactive | hsa:80824  | D01825 |
| Non-interactive | hsa:2321   | D02581 |
| Non-interactive | hsa:6098   | D00655 |

|                 |            |        |
|-----------------|------------|--------|
| Non-interactive | hsa:23430  | D00900 |
| Non-interactive | hsa:2160   | D01715 |
| Non-interactive | hsa:1633   | D01164 |
| Non-interactive | hsa:7173   | D03728 |
| Non-interactive | hsa:2042   | D00414 |
| Non-interactive | hsa:8854   | D03778 |
| Non-interactive | hsa:9641   | D01164 |
| Non-interactive | hsa:223    | D00969 |
| Non-interactive | hsa:8940   | D01973 |
| Non-interactive | hsa:4023   | D03741 |
| Non-interactive | hsa:5151   | D00537 |
| Non-interactive | hsa:1200   | D00423 |
| Non-interactive | hsa:7367   | D01825 |
| Non-interactive | hsa:1147   | D04025 |
| Non-interactive | hsa:5979   | D03720 |
| Non-interactive | hsa:63036  | D03728 |
| Non-interactive | hsa:55811  | D00188 |
| Non-interactive | hsa:51207  | D01915 |
| Non-interactive | hsa:23035  | D03689 |
| Non-interactive | hsa:128853 | D02214 |
| Non-interactive | hsa:199974 | D00550 |
| Non-interactive | hsa:4282   | D00516 |
| Non-interactive | hsa:1583   | D00519 |
| Non-interactive | hsa:4311   | D01027 |
| Non-interactive | hsa:3643   | D00965 |
| Non-interactive | hsa:22978  | D02580 |
| Non-interactive | hsa:5495   | D00463 |
| Non-interactive | hsa:1890   | D01432 |
| Non-interactive | hsa:7015   | D01862 |
| Non-interactive | hsa:766    | D00364 |
| Non-interactive | hsa:11330  | D02556 |
| Non-interactive | hsa:13     | D02731 |
| Non-interactive | hsa:55512  | D00218 |
| Non-interactive | hsa:4919   | D00218 |
| Non-interactive | hsa:6098   | D03735 |
| Non-interactive | hsa:3906   | D03882 |
| Non-interactive | hsa:2066   | D03767 |
| Non-interactive | hsa:191    | D01885 |
| Non-interactive | hsa:5860   | D00630 |
| Non-interactive | hsa:1537   | D04025 |
| Non-interactive | hsa:2548   | D00298 |
| Non-interactive | hsa:635    | D00448 |

|                 |           |        |
|-----------------|-----------|--------|
| Non-interactive | hsa:22954 | D02556 |
| Non-interactive | hsa:5330  | D02229 |
| Non-interactive | hsa:5445  | D01918 |
| Non-interactive | hsa:5475  | D03218 |
| Non-interactive | hsa:29968 | D01061 |
| Non-interactive | hsa:50487 | D00148 |
| Non-interactive | hsa:108   | D00394 |
| Non-interactive | hsa:8288  | D03734 |
| Non-interactive | hsa:5600  | D00394 |
| Non-interactive | hsa:51095 | D01918 |
| Non-interactive | hsa:54575 | D01765 |
| Non-interactive | hsa:4953  | D03736 |
| Non-interactive | hsa:834   | D00208 |
| Non-interactive | hsa:444   | D00188 |
| Non-interactive | hsa:5152  | D03736 |
| Non-interactive | hsa:1571  | D03712 |
| Non-interactive | hsa:28972 | D02769 |
| Non-interactive | hsa:5537  | D02214 |
| Non-interactive | hsa:107   | D03077 |
| Non-interactive | hsa:4311  | D02556 |
| Non-interactive | hsa:64816 | D01578 |
| Non-interactive | hsa:5834  | D00781 |
| Non-interactive | hsa:5536  | D03882 |
| Non-interactive | hsa:1033  | D00398 |
| Non-interactive | hsa:4837  | D01974 |
| Non-interactive | hsa:2065  | D04031 |
| Non-interactive | hsa:6898  | D00463 |
| Non-interactive | hsa:834   | D00187 |
| Non-interactive | hsa:2595  | D02709 |
| Non-interactive | hsa:4067  | D03743 |
| Non-interactive | hsa:80824 | D00805 |
| Non-interactive | hsa:686   | D01842 |
| Non-interactive | hsa:35    | D01275 |
| Non-interactive | hsa:5645  | D02333 |
| Non-interactive | hsa:51207 | D00387 |
| Non-interactive | hsa:28227 | D01133 |
| Non-interactive | hsa:5476  | D01984 |
| Non-interactive | hsa:10549 | D01915 |
| Non-interactive | hsa:109   | D04031 |
| Non-interactive | hsa:660   | D00294 |
| Non-interactive | hsa:645   | D03826 |
| Non-interactive | hsa:2064  | D02655 |

|                 |            |        |
|-----------------|------------|--------|
| Non-interactive | hsa:2746   | D02193 |
| Non-interactive | hsa:231    | D02451 |
| Non-interactive | hsa:3643   | D01397 |
| Non-interactive | hsa:5624   | D00885 |
| Non-interactive | hsa:5149   | D01071 |
| Non-interactive | hsa:23436  | D01240 |
| Non-interactive | hsa:225689 | D01133 |
| Non-interactive | hsa:1847   | D03717 |
| Non-interactive | hsa:1543   | D01915 |
| Non-interactive | hsa:55312  | D01223 |
| Non-interactive | hsa:4907   | D00252 |
| Non-interactive | hsa:306    | D03743 |
| Non-interactive | hsa:285220 | D03765 |
| Non-interactive | hsa:1585   | D00781 |
| Non-interactive | hsa:7015   | D03743 |
| Non-interactive | hsa:635    | D01180 |
| Non-interactive | hsa:11238  | D03717 |
| Non-interactive | hsa:111    | D00198 |
| Non-interactive | hsa:354    | D02258 |
| Non-interactive | hsa:2356   | D00965 |
| Non-interactive | hsa:216    | D01765 |
| Non-interactive | hsa:1537   | D00187 |
| Non-interactive | hsa:128853 | D00298 |
| Non-interactive | hsa:5321   | D01885 |
| Non-interactive | hsa:8972   | D00455 |
| Non-interactive | hsa:6713   | D01211 |
| Non-interactive | hsa:10667  | D03751 |
| Non-interactive | hsa:7174   | D00515 |
| Non-interactive | hsa:5645   | D00187 |
| Non-interactive | hsa:4067   | D00414 |
| Non-interactive | hsa:5294   | D02655 |
| Non-interactive | hsa:3034   | D01828 |
| Non-interactive | hsa:1571   | D00315 |
| Non-interactive | hsa:768    | D00070 |
| Non-interactive | hsa:10295  | D03816 |
| Non-interactive | hsa:5033   | D01164 |
| Non-interactive | hsa:3615   | D01844 |
| Non-interactive | hsa:1363   | D00889 |
| Non-interactive | hsa:1565   | D01984 |
| Non-interactive | hsa:4233   | D00519 |
| Non-interactive | hsa:4143   | D00893 |
| Non-interactive | hsa:5550   | D00188 |

|                 |            |        |
|-----------------|------------|--------|
| Non-interactive | hsa:5831   | D03077 |
| Non-interactive | hsa:11330  | D02731 |
| Non-interactive | hsa:2046   | D02698 |
| Non-interactive | hsa:339221 | D00094 |
| Non-interactive | hsa:64816  | D02168 |
| Non-interactive | hsa:7297   | D00567 |
| Non-interactive | hsa:9955   | D00519 |
| Non-interactive | hsa:5834   | D00813 |
| Non-interactive | hsa:2232   | D01276 |
| Non-interactive | hsa:6646   | D00655 |
| Non-interactive | hsa:5599   | D00325 |
| Non-interactive | hsa:3818   | D01196 |
| Non-interactive | hsa:1543   | D03751 |
| Non-interactive | hsa:1582   | D00196 |
| Non-interactive | hsa:5407   | D00187 |
| Non-interactive | hsa:3702   | D03712 |
| Non-interactive | hsa:4025   | D00969 |
| Non-interactive | hsa:5138   | D01862 |
| Non-interactive | hsa:23239  | D02176 |
| Non-interactive | hsa:1576   | D02729 |
| Non-interactive | hsa:5137   | D00126 |
| Non-interactive | hsa:5595   | D01709 |
| Non-interactive | hsa:4486   | D00148 |
| Non-interactive | hsa:1429   | D00325 |
| Non-interactive | hsa:142679 | D02017 |
| Non-interactive | hsa:55902  | D00070 |
| Non-interactive | hsa:5531   | D01715 |
| Non-interactive | hsa:5137   | D00900 |
| Non-interactive | hsa:5602   | D00035 |
| Non-interactive | hsa:1553   | D00658 |
| Non-interactive | hsa:9601   | D03752 |
| Non-interactive | hsa:2043   | D03643 |
| Non-interactive | hsa:7015   | D02835 |
| Non-interactive | hsa:349565 | D02289 |
| Non-interactive | hsa:1847   | D02355 |
| Non-interactive | hsa:8854   | D03752 |
| Non-interactive | hsa:5742   | D01276 |
| Non-interactive | hsa:53938  | D00118 |
| Non-interactive | hsa:4953   | D00549 |
| Non-interactive | hsa:2224   | D00569 |
| Non-interactive | hsa:151531 | D00826 |
| Non-interactive | hsa:7174   | D01211 |

|                 |            |        |
|-----------------|------------|--------|
| Non-interactive | hsa:134510 | D01367 |
| Non-interactive | hsa:5445   | D00487 |
| Non-interactive | hsa:306    | D00065 |
| Non-interactive | hsa:7299   | D00882 |
| Non-interactive | hsa:7083   | D00733 |
| Non-interactive | hsa:765    | D01180 |
| Non-interactive | hsa:18     | D00584 |
| Non-interactive | hsa:7371   | D01981 |
| Non-interactive | hsa:1585   | D01136 |
| Non-interactive | hsa:6897   | D00332 |
| Non-interactive | hsa:80339  | D00449 |
| Non-interactive | hsa:771    | D01332 |
| Non-interactive | hsa:5594   | D00533 |
| Non-interactive | hsa:2135   | D02328 |
| Non-interactive | hsa:8854   | D00132 |
| Non-interactive | hsa:5481   | D03722 |
| Non-interactive | hsa:762    | D03736 |
| Non-interactive | hsa:32     | D02176 |
| Non-interactive | hsa:9023   | D00577 |
| Non-interactive | hsa:2677   | D03829 |
| Non-interactive | hsa:760    | D03350 |
| Non-interactive | hsa:240    | D03077 |
| Non-interactive | hsa:1800   | D02068 |
| Non-interactive | hsa:10667  | D00251 |
| Non-interactive | hsa:5340   | D00455 |
| Non-interactive | hsa:1548   | D02355 |
| Non-interactive | hsa:8940   | D00049 |
| Non-interactive | hsa:216    | D01862 |
| Non-interactive | hsa:1267   | D00039 |
| Non-interactive | hsa:51302  | D00328 |
| Non-interactive | hsa:124    | D03077 |
| Non-interactive | hsa:54578  | D00501 |
| Non-interactive | hsa:2155   | D00094 |
| Non-interactive | hsa:1846   | D00537 |
| Non-interactive | hsa:23239  | D02561 |
| Non-interactive | hsa:10858  | D00535 |
| Non-interactive | hsa:5126   | D00035 |
| Non-interactive | hsa:590    | D02356 |
| Non-interactive | hsa:1580   | D00827 |
| Non-interactive | hsa:2322   | D00596 |
| Non-interactive | hsa:10825  | D00530 |
| Non-interactive | hsa:7371   | D00496 |

|                 |            |        |
|-----------------|------------|--------|
| Non-interactive | hsa:28     | D02323 |
| Non-interactive | hsa:4311   | D00158 |
| Non-interactive | hsa:224    | D00650 |
| Non-interactive | hsa:5330   | D00963 |
| Non-interactive | hsa:763    | D00829 |
| Non-interactive | hsa:6300   | D03765 |
| Non-interactive | hsa:189    | D04983 |
| Non-interactive | hsa:5337   | D00036 |
| Non-interactive | hsa:2673   | D00293 |
| Non-interactive | hsa:90     | D03784 |
| Non-interactive | hsa:7153   | D02559 |
| Non-interactive | hsa:4190   | D02350 |
| Non-interactive | hsa:54490  | D01547 |
| Non-interactive | hsa:279    | D04292 |
| Non-interactive | hsa:5599   | D00127 |
| Non-interactive | hsa:54     | D02042 |
| Non-interactive | hsa:1573   | D01665 |
| Non-interactive | hsa:587    | D00136 |
| Non-interactive | hsa:5476   | D01690 |
| Non-interactive | hsa:8399   | D00560 |
| Non-interactive | hsa:51251  | D01842 |
| Non-interactive | hsa:57016  | D00185 |
| Non-interactive | hsa:2321   | D05407 |
| Non-interactive | hsa:1593   | D00546 |
| Non-interactive | hsa:38     | D00418 |
| Non-interactive | hsa:11343  | D00037 |
| Non-interactive | hsa:25     | D01974 |
| Non-interactive | hsa:7015   | D00285 |
| Non-interactive | hsa:2548   | D03773 |
| Non-interactive | hsa:25     | D01767 |
| Non-interactive | hsa:8398   | D00488 |
| Non-interactive | hsa:4914   | D04029 |
| Non-interactive | hsa:5294   | D01513 |
| Non-interactive | hsa:5494   | D02556 |
| Non-interactive | hsa:51365  | D00670 |
| Non-interactive | hsa:5515   | D00691 |
| Non-interactive | hsa:8398   | D02229 |
| Non-interactive | hsa:5052   | D00359 |
| Non-interactive | hsa:5599   | D00401 |
| Non-interactive | hsa:1559   | D03710 |
| Non-interactive | hsa:130399 | D01977 |
| Non-interactive | hsa:1432   | D00475 |



|                 |            |        |
|-----------------|------------|--------|
| Non-interactive | hsa:51292  | D02559 |
| Non-interactive | hsa:1436   | D00417 |
| Non-interactive | hsa:1991   | D03826 |
| Non-interactive | hsa:5168   | D03736 |
| Non-interactive | hsa:5445   | D03716 |
| Non-interactive | hsa:5333   | D01180 |
| Non-interactive | hsa:1890   | D00625 |
| Non-interactive | hsa:7367   | D00650 |
| Non-interactive | hsa:5606   | D00533 |
| Non-interactive | hsa:3001   | D02017 |
| Non-interactive | hsa:5051   | D00227 |
| Non-interactive | hsa:51181  | D01565 |
| Non-interactive | hsa:2321   | D01264 |
| Non-interactive | hsa:2049   | D03670 |
| Non-interactive | hsa:8836   | D03765 |
| Non-interactive | hsa:91039  | D03734 |
| Non-interactive | hsa:5340   | D00380 |
| Non-interactive | hsa:2356   | D02193 |
| Non-interactive | hsa:5447   | D00574 |
| Non-interactive | hsa:4128   | D01432 |
| Non-interactive | hsa:64802  | D03773 |
| Non-interactive | hsa:2673   | D00970 |
| Non-interactive | hsa:763    | D01565 |
| Non-interactive | hsa:8836   | D00410 |
| Non-interactive | hsa:4953   | D00328 |
| Non-interactive | hsa:9955   | D03763 |
| Non-interactive | hsa:9641   | D00109 |
| Non-interactive | hsa:54657  | D02579 |
| Non-interactive | hsa:23430  | D01180 |
| Non-interactive | hsa:260293 | D03012 |
| Non-interactive | hsa:5141   | D01180 |
| Non-interactive | hsa:8622   | D01276 |
| Non-interactive | hsa:1056   | D00501 |
| Non-interactive | hsa:4914   | D00027 |
| Non-interactive | hsa:1056   | D02709 |
| Non-interactive | hsa:5333   | D00054 |
| Non-interactive | hsa:767    | D03733 |
| Non-interactive | hsa:54878  | D02418 |
| Non-interactive | hsa:7297   | D02731 |
| Non-interactive | hsa:25824  | D02562 |
| Non-interactive | hsa:1544   | D03736 |
| Non-interactive | hsa:2235   | D03741 |

|                 |           |        |
|-----------------|-----------|--------|
| Non-interactive | hsa:5138  | D01064 |
| Non-interactive | hsa:2595  | D00036 |
| Non-interactive | hsa:8622  | D03899 |
| Non-interactive | hsa:3939  | D03714 |
| Non-interactive | hsa:2044  | D03773 |
| Non-interactive | hsa:686   | D03717 |
| Non-interactive | hsa:5533  | D02487 |
| Non-interactive | hsa:1595  | D03752 |
| Non-interactive | hsa:11266 | D00805 |
| Non-interactive | hsa:1543  | D03822 |
| Non-interactive | hsa:7299  | D00630 |
| Non-interactive | hsa:111   | D02323 |
| Non-interactive | hsa:3791  | D00359 |
| Non-interactive | hsa:11238 | D01915 |
| Non-interactive | hsa:51172 | D01136 |
| Non-interactive | hsa:90    | D00538 |
| Non-interactive | hsa:3817  | D00656 |
| Non-interactive | hsa:219   | D00970 |
| Non-interactive | hsa:5151  | D00294 |
| Non-interactive | hsa:2534  | D00786 |
| Non-interactive | hsa:5330  | D01712 |
| Non-interactive | hsa:27032 | D02671 |
| Non-interactive | hsa:7173  | D01718 |
| Non-interactive | hsa:2147  | D00947 |
| Non-interactive | hsa:1178  | D05458 |
| Non-interactive | hsa:5045  | D00519 |
| Non-interactive | hsa:7173  | D00394 |
| Non-interactive | hsa:3615  | D01069 |
| Non-interactive | hsa:5126  | D00342 |
| Non-interactive | hsa:3945  | D02290 |
| Non-interactive | hsa:80824 | D03760 |
| Non-interactive | hsa:635   | D00900 |
| Non-interactive | hsa:5136  | D02304 |
| Non-interactive | hsa:64499 | D00542 |
| Non-interactive | hsa:5045  | D00141 |
| Non-interactive | hsa:1363  | D03773 |
| Non-interactive | hsa:2051  | D03829 |
| Non-interactive | hsa:2098  | D00566 |
| Non-interactive | hsa:5336  | D00785 |
| Non-interactive | hsa:5515  | D00781 |
| Non-interactive | hsa:5550  | D00097 |
| Non-interactive | hsa:3028  | D03717 |

|                 |            |        |
|-----------------|------------|--------|
| Non-interactive | hsa:7010   | D00065 |
| Non-interactive | hsa:2180   | D00494 |
| Non-interactive | hsa:113    | D00889 |
| Non-interactive | hsa:5740   | D01718 |
| Non-interactive | hsa:216    | D00650 |
| Non-interactive | hsa:1376   | D01325 |
| Non-interactive | hsa:2041   | D00371 |
| Non-interactive | hsa:2050   | D00039 |
| Non-interactive | hsa:5651   | D01513 |
| Non-interactive | hsa:242    | D00521 |
| Non-interactive | hsa:7172   | D00298 |
| Non-interactive | hsa:1636   | D01425 |
| Non-interactive | hsa:4860   | D00398 |
| Non-interactive | hsa:2936   | D00785 |
| Non-interactive | hsa:3290   | D01275 |
| Non-interactive | hsa:354    | D02304 |
| Non-interactive | hsa:6799   | D02355 |
| Non-interactive | hsa:5605   | D01276 |
| Non-interactive | hsa:7378   | D03440 |
| Non-interactive | hsa:2339   | D00049 |
| Non-interactive | hsa:5147   | D00155 |
| Non-interactive | hsa:4921   | D00512 |
| Non-interactive | hsa:10056  | D00563 |
| Non-interactive | hsa:284541 | D01332 |
| Non-interactive | hsa:390956 | D03643 |
| Non-interactive | hsa:1581   | D01915 |
| Non-interactive | hsa:313    | D01118 |
| Non-interactive | hsa:7372   | D01715 |
| Non-interactive | hsa:7301   | D00593 |
| Non-interactive | hsa:5321   | D00029 |
| Non-interactive | hsa:8972   | D01475 |
| Non-interactive | hsa:279    | D00005 |
| Non-interactive | hsa:3283   | D03738 |
| Non-interactive | hsa:64816  | D00827 |
| Non-interactive | hsa:9601   | D03753 |
| Non-interactive | hsa:1504   | D00579 |
| Non-interactive | hsa:5624   | D00359 |
| Non-interactive | hsa:5095   | D00577 |
| Non-interactive | hsa:4914   | D00417 |
| Non-interactive | hsa:5320   | D00126 |
| Non-interactive | hsa:3791   | D00752 |
| Non-interactive | hsa:2673   | D00543 |

|                 |            |        |
|-----------------|------------|--------|
| Non-interactive | hsa:223    | D00781 |
| Non-interactive | hsa:5481   | D01973 |
| Non-interactive | hsa:51207  | D04024 |
| Non-interactive | hsa:57016  | D03829 |
| Non-interactive | hsa:2264   | D00038 |
| Non-interactive | hsa:51645  | D00158 |
| Non-interactive | hsa:10747  | D01441 |
| Non-interactive | hsa:1573   | D00658 |
| Non-interactive | hsa:4051   | D04025 |
| Non-interactive | hsa:5167   | D03601 |
| Non-interactive | hsa:9601   | D01119 |
| Non-interactive | hsa:1429   | D00455 |
| Non-interactive | hsa:84618  | D02229 |
| Non-interactive | hsa:5091   | D00623 |
| Non-interactive | hsa:260293 | D00656 |
| Non-interactive | hsa:150290 | D02581 |
| Non-interactive | hsa:11330  | D00781 |
| Non-interactive | hsa:29920  | D01984 |
| Non-interactive | hsa:2582   | D02580 |
| Non-interactive | hsa:3001   | D00528 |
| Non-interactive | hsa:5338   | D00903 |
| Non-interactive | hsa:150290 | D00781 |
| Non-interactive | hsa:94     | D02258 |
| Non-interactive | hsa:2263   | D02335 |
| Non-interactive | hsa:64802  | D01549 |
| Non-interactive | hsa:6241   | D03722 |
| Non-interactive | hsa:3718   | D00533 |
| Non-interactive | hsa:9601   | D00094 |
| Non-interactive | hsa:3055   | D00274 |
| Non-interactive | hsa:3939   | D03710 |
| Non-interactive | hsa:2185   | D00227 |
| Non-interactive | hsa:79799  | D01432 |
| Non-interactive | hsa:2950   | D03712 |
| Non-interactive | hsa:635    | D00107 |
| Non-interactive | hsa:5494   | D03775 |
| Non-interactive | hsa:2048   | D01665 |
| Non-interactive | hsa:7172   | D00132 |
| Non-interactive | hsa:260293 | D00217 |
| Non-interactive | hsa:4921   | D00131 |
| Non-interactive | hsa:5475   | D00145 |
| Non-interactive | hsa:223    | D00036 |
| Non-interactive | hsa:240    | D00550 |

|                 |            |        |
|-----------------|------------|--------|
| Non-interactive | hsa:1846   | D02290 |
| Non-interactive | hsa:113    | D02562 |
| Non-interactive | hsa:1582   | D04025 |
| Non-interactive | hsa:1562   | D02579 |
| Non-interactive | hsa:7294   | D00315 |
| Non-interactive | hsa:5478   | D00620 |
| Non-interactive | hsa:1846   | D01325 |
| Non-interactive | hsa:4920   | D00168 |
| Non-interactive | hsa:2242   | D00217 |
| Non-interactive | hsa:5294   | D03643 |
| Non-interactive | hsa:55811  | D00186 |
| Non-interactive | hsa:134510 | D00362 |
| Non-interactive | hsa:51727  | D00014 |
| Non-interactive | hsa:3295   | D00904 |
| Non-interactive | hsa:8940   | D00283 |
| Non-interactive | hsa:5408   | D04197 |
| Non-interactive | hsa:5328   | D04197 |
| Non-interactive | hsa:2326   | D00566 |
| Non-interactive | hsa:501    | D03803 |
| Non-interactive | hsa:5501   | D01097 |
| Non-interactive | hsa:2822   | D00274 |
| Non-interactive | hsa:1558   | D00970 |
| Non-interactive | hsa:5646   | D03763 |
| Non-interactive | hsa:64087  | D01565 |
| Non-interactive | hsa:3035   | D02017 |
| Non-interactive | hsa:5407   | D03218 |
| Non-interactive | hsa:7083   | D01667 |
| Non-interactive | hsa:1429   | D00052 |
| Non-interactive | hsa:1562   | D00183 |
| Non-interactive | hsa:3945   | D01885 |
| Non-interactive | hsa:10     | D01119 |
| Non-interactive | hsa:1178   | D00131 |
| Non-interactive | hsa:7299   | D00889 |
| Non-interactive | hsa:10747  | D00279 |
| Non-interactive | hsa:4921   | D00185 |
| Non-interactive | hsa:1846   | D01547 |
| Non-interactive | hsa:5152   | D02556 |
| Non-interactive | hsa:1728   | D01549 |
| Non-interactive | hsa:1594   | D00475 |
| Non-interactive | hsa:1595   | D00324 |
| Non-interactive | hsa:2098   | D05407 |
| Non-interactive | hsa:2051   | D04031 |

|                 |           |        |
|-----------------|-----------|--------|
| Non-interactive | hsa:57665 | D01122 |
| Non-interactive | hsa:7365  | D01665 |
| Non-interactive | hsa:4593  | D00322 |
| Non-interactive | hsa:54659 | D03882 |
| Non-interactive | hsa:9945  | D00964 |
| Non-interactive | hsa:2235  | D02562 |
| Non-interactive | hsa:5536  | D03805 |
| Non-interactive | hsa:1890  | D00650 |
| Non-interactive | hsa:84171 | D01027 |
| Non-interactive | hsa:54878 | D00568 |
| Non-interactive | hsa:5742  | D00270 |
| Non-interactive | hsa:2160  | D03741 |
| Non-interactive | hsa:23239 | D02729 |
| Non-interactive | hsa:131   | D01974 |
| Non-interactive | hsa:2261  | D00410 |
| Non-interactive | hsa:9088  | D00142 |
| Non-interactive | hsa:4058  | D00203 |
| Non-interactive | hsa:4907  | D00900 |
| Non-interactive | hsa:93650 | D00153 |
| Non-interactive | hsa:84532 | D00624 |
| Non-interactive | hsa:3735  | D04029 |
| Non-interactive | hsa:5646  | D00414 |
| Non-interactive | hsa:4759  | D00109 |
| Non-interactive | hsa:1633  | D01690 |
| Non-interactive | hsa:8529  | D00160 |
| Non-interactive | hsa:4025  | D02556 |
| Non-interactive | hsa:6300  | D00550 |
| Non-interactive | hsa:501   | D02333 |
| Non-interactive | hsa:2263  | D00324 |
| Non-interactive | hsa:2806  | D00324 |
| Non-interactive | hsa:5033  | D00252 |
| Non-interactive | hsa:5657  | D00530 |
| Non-interactive | hsa:64499 | D02698 |
| Non-interactive | hsa:2051  | D02562 |
| Non-interactive | hsa:1990  | D02441 |
| Non-interactive | hsa:128   | D02229 |
| Non-interactive | hsa:4233  | D02333 |
| Non-interactive | hsa:1581  | D01888 |
| Non-interactive | hsa:100   | D00043 |
| Non-interactive | hsa:231   | D00234 |
| Non-interactive | hsa:9647  | D00070 |
| Non-interactive | hsa:7365  | D00887 |

|                 |            |        |
|-----------------|------------|--------|
| Non-interactive | hsa:50     | D00650 |
| Non-interactive | hsa:4758   | D02194 |
| Non-interactive | hsa:13     | D00333 |
| Non-interactive | hsa:2342   | D01715 |
| Non-interactive | hsa:18     | D00434 |
| Non-interactive | hsa:240    | D00032 |
| Non-interactive | hsa:196883 | D00630 |
| Non-interactive | hsa:5601   | D00027 |
| Non-interactive | hsa:1584   | D03735 |
| Non-interactive | hsa:10720  | D00994 |
| Non-interactive | hsa:2044   | D01183 |
| Non-interactive | hsa:4920   | D00153 |
| Non-interactive | hsa:58190  | D02176 |
| Non-interactive | hsa:349565 | D02194 |
| Non-interactive | hsa:1803   | D01915 |
| Non-interactive | hsa:5562   | D00579 |
| Non-interactive | hsa:10188  | D03763 |
| Non-interactive | hsa:6259   | D03769 |
| Non-interactive | hsa:2880   | D01475 |
| Non-interactive | hsa:8192   | D02441 |
| Non-interactive | hsa:3480   | D01276 |
| Non-interactive | hsa:1633   | D01981 |
| Non-interactive | hsa:27032  | D00136 |
| Non-interactive | hsa:2235   | D03743 |
| Non-interactive | hsa:111    | D01844 |
| Non-interactive | hsa:1991   | D01907 |
| Non-interactive | hsa:5747   | D00340 |
| Non-interactive | hsa:5979   | D00998 |
| Non-interactive | hsa:55312  | D00733 |
| Non-interactive | hsa:10825  | D01183 |
| Non-interactive | hsa:2135   | D01974 |
| Non-interactive | hsa:5530   | D01981 |
| Non-interactive | hsa:5470   | D00183 |
| Non-interactive | hsa:683    | D00537 |
| Non-interactive | hsa:1363   | D00505 |
| Non-interactive | hsa:3702   | D00186 |
| Non-interactive | hsa:5594   | D01346 |
| Non-interactive | hsa:22954  | D03823 |
| Non-interactive | hsa:64499  | D03741 |
| Non-interactive | hsa:23236  | D01276 |
| Non-interactive | hsa:1675   | D03720 |
| Non-interactive | hsa:5625   | D03803 |

|                 |           |        |
|-----------------|-----------|--------|
| Non-interactive | hsa:4051  | D01332 |
| Non-interactive | hsa:5091  | D00887 |
| Non-interactive | hsa:2339  | D00045 |
| Non-interactive | hsa:1555  | D03805 |
| Non-interactive | hsa:224   | D02290 |
| Non-interactive | hsa:51292 | D00545 |
| Non-interactive | hsa:7153  | D01582 |
| Non-interactive | hsa:6646  | D00593 |
| Non-interactive | hsa:5595  | D03440 |
| Non-interactive | hsa:353   | D02441 |
| Non-interactive | hsa:4190  | D01984 |
| Non-interactive | hsa:100   | D02564 |
| Non-interactive | hsa:3716  | D00285 |
| Non-interactive | hsa:1621  | D02769 |
| Non-interactive | hsa:3643  | D03752 |
| Non-interactive | hsa:6098  | D00196 |
| Non-interactive | hsa:3615  | D03826 |
| Non-interactive | hsa:1583  | D00041 |
| Non-interactive | hsa:1675  | D01828 |
| Non-interactive | hsa:5136  | D02560 |
| Non-interactive | hsa:10549 | D00032 |
| Non-interactive | hsa:1969  | D04029 |
| Non-interactive | hsa:3614  | D01136 |
| Non-interactive | hsa:3002  | D00041 |
| Non-interactive | hsa:8398  | D00065 |
| Non-interactive | hsa:51172 | D00434 |
| Non-interactive | hsa:231   | D00398 |
| Non-interactive | hsa:5156  | D01966 |
| Non-interactive | hsa:4593  | D01211 |
| Non-interactive | hsa:7046  | D00703 |
| Non-interactive | hsa:6652  | D00007 |
| Non-interactive | hsa:5479  | D00691 |
| Non-interactive | hsa:56922 | D01840 |
| Non-interactive | hsa:1728  | D00998 |
| Non-interactive | hsa:5332  | D00521 |
| Non-interactive | hsa:23475 | D02729 |
| Non-interactive | hsa:5141  | D04029 |
| Non-interactive | hsa:660   | D00387 |
| Non-interactive | hsa:9955  | D00709 |
| Non-interactive | hsa:1633  | D01966 |
| Non-interactive | hsa:5406  | D03034 |
| Non-interactive | hsa:5050  | D00094 |



|                 |            |        |
|-----------------|------------|--------|
| Non-interactive | hsa:10935  | D02315 |
| Non-interactive | hsa:2180   | D00333 |
| Non-interactive | hsa:7299   | D02451 |
| Non-interactive | hsa:5335   | D00691 |
| Non-interactive | hsa:196883 | D00691 |
| Non-interactive | hsa:1384   | D01667 |
| Non-interactive | hsa:10924  | D00410 |
| Non-interactive | hsa:10941  | D01228 |
| Non-interactive | hsa:56922  | D01665 |
| Non-interactive | hsa:63904  | D03712 |
| Non-interactive | hsa:657    | D00475 |
| Non-interactive | hsa:7525   | D00423 |
| Non-interactive | hsa:260293 | D00459 |
| Non-interactive | hsa:100    | D01888 |
| Non-interactive | hsa:5494   | D00118 |
| Non-interactive | hsa:91     | D00300 |
| Non-interactive | hsa:3906   | D00703 |
| Non-interactive | hsa:51302  | D00726 |
| Non-interactive | hsa:5095   | D01275 |
| Non-interactive | hsa:81579  | D00892 |
| Non-interactive | hsa:7054   | D02835 |
| Non-interactive | hsa:767    | D02355 |
| Non-interactive | hsa:5651   | D01977 |
| Non-interactive | hsa:9088   | D02564 |
| Non-interactive | hsa:5837   | D00882 |
| Non-interactive | hsa:759    | D01432 |
| Non-interactive | hsa:4548   | D03670 |
| Non-interactive | hsa:8555   | D02451 |
| Non-interactive | hsa:3033   | D00904 |
| Non-interactive | hsa:3791   | D00391 |
| Non-interactive | hsa:7364   | D00340 |
| Non-interactive | hsa:760    | D03689 |
| Non-interactive | hsa:1969   | D00387 |
| Non-interactive | hsa:2597   | D00274 |
| Non-interactive | hsa:131    | D00103 |
| Non-interactive | hsa:1549   | D02258 |
| Non-interactive | hsa:3028   | D01276 |
| Non-interactive | hsa:6652   | D00709 |
| Non-interactive | hsa:223    | D00070 |
| Non-interactive | hsa:695    | D00449 |
| Non-interactive | hsa:3615   | D00328 |
| Non-interactive | hsa:7371   | D00653 |

|                 |           |        |
|-----------------|-----------|--------|
| Non-interactive | hsa:8836  | D00452 |
| Non-interactive | hsa:5595  | D03767 |
| Non-interactive | hsa:6898  | D03826 |
| Non-interactive | hsa:3712  | D00434 |
| Non-interactive | hsa:5159  | D00826 |
| Non-interactive | hsa:109   | D01425 |
| Non-interactive | hsa:7010  | D02562 |
| Non-interactive | hsa:5319  | D00139 |
| Non-interactive | hsa:55811 | D01071 |
| Non-interactive | hsa:5501  | D03743 |
| Non-interactive | hsa:51302 | D02166 |
| Non-interactive | hsa:5137  | D03440 |
| Non-interactive | hsa:3988  | D01441 |
| Non-interactive | hsa:1384  | D01198 |
| Non-interactive | hsa:5533  | D03828 |
| Non-interactive | hsa:91039 | D00391 |
| Non-interactive | hsa:5523  | D03781 |
| Non-interactive | hsa:2638  | D00653 |
| Non-interactive | hsa:4953  | D01765 |
| Non-interactive | hsa:217   | D01718 |
| Non-interactive | hsa:2264  | D03788 |
| Non-interactive | hsa:5122  | D00656 |
| Non-interactive | hsa:54577 | D00380 |
| Non-interactive | hsa:7298  | D01918 |
| Non-interactive | hsa:3612  | D00566 |
| Non-interactive | hsa:55312 | D00452 |
| Non-interactive | hsa:4837  | D01064 |
| Non-interactive | hsa:2534  | D00902 |
| Non-interactive | hsa:1537  | D02229 |
| Non-interactive | hsa:109   | D03751 |
| Non-interactive | hsa:5860  | D00018 |
| Non-interactive | hsa:5095  | D02560 |
| Non-interactive | hsa:5743  | D01715 |
| Non-interactive | hsa:5599  | D00562 |
| Non-interactive | hsa:93    | D00752 |
| Non-interactive | hsa:5330  | D00651 |
| Non-interactive | hsa:10825 | D03722 |
| Non-interactive | hsa:4759  | D00960 |
| Non-interactive | hsa:4837  | D00654 |
| Non-interactive | hsa:1585  | D00650 |
| Non-interactive | hsa:10747 | D01709 |
| Non-interactive | hsa:657   | D03218 |

|                 |           |        |
|-----------------|-----------|--------|
| Non-interactive | hsa:6652  | D00283 |
| Non-interactive | hsa:5406  | D01367 |
| Non-interactive | hsa:5516  | D02323 |
| Non-interactive | hsa:57176 | D03433 |
| Non-interactive | hsa:11330 | D00298 |
| Non-interactive | hsa:5340  | D00196 |
| Non-interactive | hsa:5602  | D00279 |
| Non-interactive | hsa:1544  | D02729 |
| Non-interactive | hsa:4482  | D00533 |
| Non-interactive | hsa:54600 | D00650 |
| Non-interactive | hsa:23475 | D01984 |
| Non-interactive | hsa:7367  | D03722 |
| Non-interactive | hsa:5532  | D00829 |
| Non-interactive | hsa:5050  | D01907 |
| Non-interactive | hsa:5033  | D03743 |
| Non-interactive | hsa:7366  | D03601 |
| Non-interactive | hsa:3295  | D00889 |

---
