# Supplementary material for: iEzy-Drug: A Web Server for Identifying the Interaction between Enzymes and Drugs in Cellular Networking
Source: Hindawi journal article supplement (doi:10.1155/2013/701317), 2013-01-01
Supplement: f2 [file 701317.f2.pdf]

**Online Supporting Information S2.** The fingerprints for the drug codes listed in [Online Supporting Information S1](#). Each of these fingerprints is a 256-D vectors generated by the OpenBabel software downloaded from <http://openbabel.org/>. See the text of the main paper for further explanation.

>D00120

|          |          |          |          |          |          |
|----------|----------|----------|----------|----------|----------|
| 00080200 | 01841200 | 00920b81 | 02910200 | 60300000 | 00802013 |
| 810010c1 | 00000403 | 00000840 | 00f829c0 | 08180300 | 7000b008 |
| 04008000 | 00211000 | 80280006 | 0008000e | 040c0400 | 02100080 |
| 40600088 | 00102801 | 80100110 | 18000a00 | 0180c840 | 08400019 |
| 01000800 | 80200001 | 80402000 | c0200021 | 005000a0 | 08028006 |
| 04000040 | 05010620 |          |          |          |          |

>D00118

|          |          |          |          |          |          |
|----------|----------|----------|----------|----------|----------|
| 00000000 | 00000008 | 20000108 | 00010200 | 00001040 | 00000000 |
| 02000000 | 00000000 | 00000000 | 00080840 | 08000000 | 40009000 |
| 01008002 | 00000000 | 41040001 | 00080008 | 08000000 | 02000000 |
| 00000000 | 00020000 | 00000000 | 08000a08 | 01000000 | 00400010 |
| 00000000 | 80000000 | 00000000 | 00000000 | 00000200 | 00020002 |
| 00002000 | 00000400 |          |          |          |          |

>D00109

|          |          |          |          |          |          |
|----------|----------|----------|----------|----------|----------|
| 04000000 | 00000808 | 20000108 | 00010200 | 00001000 | 00024000 |
| 02000000 | 00000800 | 00000100 | 00000840 | 00000000 | 40008020 |
| 02808002 | 00000000 | 01010001 | 0008200c | 00020000 | 02008000 |
| 00000000 | 00420000 | 00000000 | 08020a20 | 10000000 | 00400004 |
| 00000000 | 80000000 | 00000800 | 00000001 | 00000300 | 00020000 |
| c0004000 | 10000000 |          |          |          |          |

>D00107

|          |          |          |          |          |          |
|----------|----------|----------|----------|----------|----------|
| 00050040 | 81005000 | 00900100 | 80810700 | 803d00c0 | 00200800 |
| 02002840 | 28000442 | 04002040 | 011000a8 | 40202000 | 5041f000 |
| 1602802a | 02880002 | 80081408 | 28289008 | 10a20000 | 80000000 |
| 33c02010 | 00002201 | 00000120 | 10040e10 | 17008080 | 0810001c |
| 10201401 | 00000400 | 00c04000 | b0000021 | 00000200 | 8004000b |
| 24224000 | 00802210 |          |          |          |          |

>D00103

|          |          |          |          |          |          |
|----------|----------|----------|----------|----------|----------|
| 00040000 | 00000000 | 00000000 | 00000000 | 00200000 | 00000000 |
| 00000000 | 00000000 | 00000000 | 00000000 | 00000000 | 40005000 |
| 14008000 | 00000000 | 00000000 | 00080008 | 00000000 | 00000000 |
| 01400000 | 00000001 | 00000000 | 00000a00 | 05000000 | 00000010 |
| 00000000 | 00000000 | 00000000 | 00000000 | 00000002 | 00000000 |
| 00000000 | 00000000 |          |          |          |          |

&gt;D00097

|          |          |          |          |          |          |
|----------|----------|----------|----------|----------|----------|
| 00000000 | 00000808 | 20000100 | 00010200 | 00000000 | 00024000 |
| 02000000 | 00000800 | 00000100 | 00000840 | 00000000 | 40008000 |
| 00008002 | 00000000 | 00000000 | 00082008 | 00000000 | 02000000 |
| 00000000 | 00020000 | 00000000 | 08020a20 | 00000000 | 00400004 |
| 00000000 | 80000000 | 00000000 | 00000000 | 00000000 | 00020000 |
| c0000000 | 00000000 |          |          |          |          |

&gt;D00094

|          |          |          |          |          |          |
|----------|----------|----------|----------|----------|----------|
| 00000400 | 01040020 | 00000000 | 00000000 | 40000000 | 00000001 |
| 00000000 | 00000402 | 01004000 | 00100000 | 00000000 | 40000000 |
| 00028000 | 20020004 | 00000400 | 0008000c | 00000000 | 00000020 |
| 02092090 | 00000001 | 00000000 | 00000a00 | 00408000 | 00000012 |
| 00201000 | 00000000 | 00404000 | 80000000 | 00000000 | 00000000 |
| 24820000 | 00000000 |          |          |          |          |

&gt;D00070

|          |          |          |          |          |          |
|----------|----------|----------|----------|----------|----------|
| 1003c00a | 01a05800 | 00180902 | 98010e10 | 001a10c0 | 0010c000 |
| 0000f004 | 22001801 | 16400100 | 000208e0 | 41210004 | 4000b000 |
| 06008822 | 02408000 | 008e0440 | 000c010c | 18040000 | 0200c000 |
| 08400000 | 40200201 | 40100080 | 1c068e40 | 23810840 | 0070001c |
| 00140000 | c0000001 | 68008000 | b0040084 | 0000c10c | 00461801 |
| e0044000 | 80800a80 |          |          |          |          |

&gt;D00065

|          |          |          |          |          |          |
|----------|----------|----------|----------|----------|----------|
| 00010000 | 01000000 | 00000000 | 00000400 | 00080000 | 00000000 |
| 00000000 | 00000000 | 00000000 | 00000080 | 00000000 | 40003000 |
| 04008000 | 00000000 | 00000000 | 00080008 | 00000000 | 00000000 |
| 00400000 | 00000001 | 00000000 | 10000a00 | 03000000 | 00000010 |
| 00000000 | 00000000 | 00000000 | 00000000 | 00000000 | 00040000 |
| 00000000 | 00000000 |          |          |          |          |

&gt;D00055

|          |          |          |          |          |          |
|----------|----------|----------|----------|----------|----------|
| 00000002 | 00001800 | 00000100 | 02040600 | 00000000 | 0000c000 |
| 00000800 | 00000404 | 06400300 | 40040020 | 04080004 | 40000800 |
| 00008000 | 00700000 | 00220000 | 000c000c | 00008000 | 03008000 |
| 00400000 | 00000000 | 00000000 | 00000a00 | 20800040 | 00100104 |
| 00040000 | c0000080 | 20000028 | 00040010 | 00004004 | 08420001 |
| c0800000 | 000000a0 |          |          |          |          |

&gt;D00054

|          |          |          |          |          |          |
|----------|----------|----------|----------|----------|----------|
| 0000000a | 01c01800 | 80080000 | 80010600 | 003800e0 | 0000c140 |
| 00008c04 | 00000000 | 06400100 | 818000b0 | 0c00800c | 40018000 |

|          |          |          |          |          |          |
|----------|----------|----------|----------|----------|----------|
| 00009000 | 03c80100 | 00081080 | 001ec00c | 00200020 | 00008000 |
| 19c00000 | 00001001 | 80080120 | 10000050 | 27800040 | 0c300014 |
| 10000400 | c0200002 | 60000200 | 10040070 | 00004200 | 00460000 |
| c0280000 | 00000280 |          |          |          |          |

>D00052

|          |          |          |          |          |          |
|----------|----------|----------|----------|----------|----------|
| 00000000 | 00000000 | 00000000 | 04000400 | 00000080 | 00000000 |
| 00000000 | 00000000 | 00000000 | 00000000 | 00202000 | 40002000 |
| 02008002 | 00002003 | 00300000 | 00080008 | 10000000 | 00000000 |
| 00000000 | 00000000 | 00000000 | 20000a00 | 02000000 | 02000000 |
| 00000000 | 00000000 | 00000000 | 00000000 | 08000000 | 00040000 |
| 00004000 | 00000200 |          |          |          |          |

>D00050

|          |          |          |          |          |          |
|----------|----------|----------|----------|----------|----------|
| 0000002a | 01800800 | 80080100 | 02050600 | 003c0060 | 0000c040 |
| 00008006 | 00000000 | 06400100 | 808008e0 | 0c00000c | 40018000 |
| 80008800 | 01e00000 | 00ac00c0 | 000cc00c | 08000000 | 0280c004 |
| 09e00000 | 00000001 | c0000080 | 18008070 | 27800040 | 84700014 |
| 00040000 | c0000000 | 60008040 | 00040030 | 00404000 | 00460040 |
| c00c0000 | 000002a0 |          |          |          |          |

>D00049

|          |          |          |          |          |          |
|----------|----------|----------|----------|----------|----------|
| 00000002 | 00800800 | 00004100 | 00000210 | 00041000 | 00004000 |
| 00000000 | 00000000 | 00000100 | 00000040 | 00000004 | 40000000 |
| 00008800 | 00000000 | 00000000 | 000c000c | 00000000 | 02000004 |
| 00200000 | 00000000 | c0000000 | 08048a40 | 20800000 | 0040000c |
| 00040000 | 00000000 | 08000000 | 00000000 | 00400000 | 00020000 |
| c0000000 | 00000000 |          |          |          |          |

>D00045

|          |          |          |          |          |          |
|----------|----------|----------|----------|----------|----------|
| 0000000a | 01c01800 | 80080000 | 88090620 | 003800e0 | 0000c000 |
| 00008c00 | 00000800 | 00400100 | 018000b0 | 0c00800c | 40019004 |
| 00001000 | 03880100 | 00081080 | 101ec00c | 00200020 | 00000000 |
| 19c00000 | 80201001 | 80080020 | 10000050 | 27800040 | 0c000014 |
| 10000400 | 40000002 | 00000200 | 10000070 | 00000208 | 00460000 |
| c0280000 | 000000c0 |          |          |          |          |

>D00043

|          |          |          |          |          |          |
|----------|----------|----------|----------|----------|----------|
| 00000001 | 00000000 | 00000000 | 00000000 | 00000004 | 00080000 |
| 40004000 | 00000000 | 00000000 | 00000000 | 00000000 | 40000000 |
| 00000000 | 00020020 | 00000000 | 00080008 | 00000060 | 00800000 |
| 20000000 | 00000002 | 00000000 | 04000800 | 00000000 | 00000010 |
| 00000000 | 00000000 | 02000000 | 00010000 | 00010000 | 00008000 |
| 00000000 | 00008200 |          |          |          |          |

&gt;D00041

|          |          |          |          |          |          |
|----------|----------|----------|----------|----------|----------|
| 00000000 | 00000000 | 00000000 | 00000400 | 00000000 | 00000000 |
| 00000000 | 00000000 | 00000000 | 00000000 | 00000000 | 40003000 |
| 14008000 | 00000000 | 00000000 | 00080008 | 00000000 | 00000000 |
| 01400000 | 00000001 | 00000000 | 10000a00 | 03000000 | 00000010 |
| 00000000 | 00000000 | 00000000 | 00000000 | 00000000 | 00040000 |
| 00000000 | 00000000 |          |          |          |          |

&gt;D00039

|          |          |          |          |          |          |
|----------|----------|----------|----------|----------|----------|
| 00000000 | 00000000 | 00000000 | 00000400 | 00000000 | 00000000 |
| 00000000 | 00000000 | 00000000 | 00000000 | 00000000 | 40003000 |
| 04008000 | 00000000 | 00000000 | 00080008 | 00000000 | 00000000 |
| 00400000 | 00000001 | 00000000 | 10000a00 | 03000000 | 00000010 |
| 00000000 | 00000000 | 00000000 | 00000000 | 00000000 | 00040000 |
| 00000000 | 00000000 |          |          |          |          |

&gt;D00038

|          |          |          |          |          |          |
|----------|----------|----------|----------|----------|----------|
| 00000000 | 00000800 | 00000100 | 00010200 | 00000000 | 00004000 |
| 00000000 | 00000000 | 00000100 | 00000840 | 00000000 | 40008000 |
| 00008000 | 00000000 | 00000000 | 00080008 | 00000000 | 02000000 |
| 00000000 | 00000000 | 00000000 | 08020a20 | 00000000 | 00400004 |
| 00000000 | 80000000 | 00000000 | 00000000 | 00000000 | 00020000 |
| c0000000 | 00000000 |          |          |          |          |

&gt;D00037

|          |          |          |          |          |          |
|----------|----------|----------|----------|----------|----------|
| 00050000 | 01000000 | 00000000 | 00000000 | 00280000 | 00000000 |
| 00000000 | 00000000 | 00000000 | 00020000 | 00000000 | 40005000 |
| 14008020 | 02000000 | 00000000 | 00080008 | 00000000 | 00000000 |
| 01400000 | 00000001 | 00000000 | 00000a00 | 05000000 | 00000010 |
| 00000000 | 00000000 | 00000000 | 00000000 | 00000002 | 00000000 |
| 00000000 | 00000000 |          |          |          |          |

&gt;D00036

|          |          |          |          |          |          |
|----------|----------|----------|----------|----------|----------|
| 00000002 | 00808800 | 00004100 | 00000610 | 00041000 | 00000000 |
| 00004000 | 00001000 | 00000000 | 00000040 | 01000004 | 40000000 |
| 00008800 | 00000000 | 00000000 | 00040004 | 00000000 | 02000004 |
| 00200000 | 00000000 | c0000000 | 08048600 | 20800000 | 0040000c |
| 00040000 | 00000000 | 08000000 | 00000000 | 00400000 | 00060000 |
| 80000000 | 80000000 |          |          |          |          |

&gt;D00035

|          |          |          |          |          |          |
|----------|----------|----------|----------|----------|----------|
| 00010000 | 01000000 | 00100000 | 00000400 | 00080080 | 00000010 |
| 00000000 | 00000000 | 00000000 | 00000080 | 00200000 | 40013000 |

|          |          |          |          |          |          |
|----------|----------|----------|----------|----------|----------|
| 06008012 | 01000000 | 80080000 | 00080008 | 10000000 | 00000000 |
| 00400000 | 00000201 | 00000000 | 10000a00 | 03000000 | 00000010 |
| 00000000 | 00000000 | 00000000 | 00000000 | 00000000 | 00040000 |
| 00004000 | 00000200 |          |          |          |          |

>D00032

|          |          |          |          |          |          |
|----------|----------|----------|----------|----------|----------|
| 00000002 | 00000000 | 00000000 | 01800410 | 04000040 | 00000000 |
| 00002000 | 00000000 | 00400900 | 00090200 | 20008000 | 50013800 |
| 04008000 | 00100800 | 00020000 | 000c000c | 00000000 | 0e000000 |
| 00400018 | 40000001 | 00000c00 | 10000a00 | 230000c0 | 00000010 |
| 00041001 | 00000200 | 00000000 | 00000000 | 04000004 | 00460000 |
| 40000000 | 20000000 |          |          |          |          |

>D00029

|          |          |          |          |          |          |
|----------|----------|----------|----------|----------|----------|
| 00010000 | 47003000 | 20100000 | 00100c40 | 00080000 | 00000000 |
| 00000004 | 00002000 | 04200000 | 020040c0 | 00200000 | 40071000 |
| 0401900c | 00840100 | 00000000 | 00080008 | 04001000 | 00002000 |
| 00402060 | 00000101 | c0000100 | 30050e10 | 01000300 | 08300018 |
| 00010000 | 00000000 | 00004000 | 10000020 | 08000000 | 00040021 |
| 000a0000 | 03010200 |          |          |          |          |

>D00027

|          |          |          |          |          |          |
|----------|----------|----------|----------|----------|----------|
| 00000002 | 00000000 | 00000000 | 02000600 | 00000000 | 00004000 |
| 00000000 | 00000000 | 06000100 | 00000020 | 04000004 | 00000000 |
| 00008000 | 00400000 | 00200000 | 000c0004 | 00000000 | 00008000 |
| 00400000 | 00000000 | 00000000 | 00000000 | 20800040 | 00100000 |
| 00040000 | c0000000 | 20000000 | 00040000 | 00004000 | 00420000 |
| 40000000 | 00000080 |          |          |          |          |

>D00021

|          |          |          |          |          |          |
|----------|----------|----------|----------|----------|----------|
| 00000000 | 00000000 | 00000100 | 00010600 | 00000000 | 00000000 |
| 00000000 | 00000000 | 00000800 | 00080840 | 08100000 | 4000b000 |
| 04008000 | 00000000 | 00000000 | 00080008 | 00000000 | 02000000 |
| 00400008 | 00000001 | 00000100 | 18000a00 | 03000040 | 81400010 |
| 00000800 | 80000000 | 00000000 | 00000000 | 04000000 | 00060002 |
| 00000000 | 00000400 |          |          |          |          |

>D00018

|          |          |          |          |          |          |
|----------|----------|----------|----------|----------|----------|
| 00040008 | 80000000 | 00000500 | 10010200 | 00600040 | 00000000 |
| 02000280 | 28001400 | 01000000 | 01500000 | 00000300 | 4000c000 |
| 88028000 | 00000001 | 00080004 | 000a8008 | 00020010 | 00000000 |
| 01454010 | 00002001 | 00000020 | 01000a80 | 05008000 | 08000010 |
| 00001400 | 00000400 | 00400000 | 80000020 | 00014200 | 00000008 |
| 14000000 | 00800010 |          |          |          |          |

&gt;D00014

|          |          |          |          |          |          |
|----------|----------|----------|----------|----------|----------|
| 00030000 | 01006000 | 00100000 | 04100400 | 00080080 | 00000000 |
| 00000000 | 20000008 | 00200000 | 02020080 | 00200000 | 40033000 |
| 06008032 | 01042001 | 80180000 | 00080008 | 10000000 | 00000000 |
| 00400000 | 00400301 | 40000000 | 30000e00 | 03000201 | 06100018 |
| 00000000 | 00000000 | 00000000 | 10000000 | 08000000 | 00040021 |
| 20004000 | 03010200 |          |          |          |          |

&gt;D00007

|          |          |          |          |          |          |
|----------|----------|----------|----------|----------|----------|
| 00030000 | 01000000 | 00000000 | 00000400 | 00180000 | 00000000 |
| 00000000 | 00000000 | 00000000 | 00020080 | 00000000 | 40003000 |
| 04008020 | 02000000 | 00000000 | 00080008 | 00000000 | 00000000 |
| 00400000 | 00000001 | 00000000 | 10000a00 | 03000000 | 00000010 |
| 00000000 | 00000000 | 00000000 | 00000000 | 00000000 | 00040000 |
| 00000000 | 00000000 |          |          |          |          |

&gt;D00005

|          |          |          |          |          |          |
|----------|----------|----------|----------|----------|----------|
| 0000002a | 01c01800 | 80480510 | 8b0d0e20 | 003c00e4 | 0010c040 |
| 0080cc06 | 00000800 | 06404100 | 818008f0 | 0c00800c | 40019004 |
| 80009800 | 03ea0120 | 04ac10c0 | 101eca0c | 092a0020 | 0280c00e |
| 19e00000 | 80205003 | c00800a0 | 1c008870 | 27800040 | 8c700014 |
| 50040400 | c0000102 | 6e008240 | 10050070 | 00404208 | 00460054 |
| c16c0000 | 4000a2e2 |          |          |          |          |

&gt;D00002

|          |          |          |          |          |          |
|----------|----------|----------|----------|----------|----------|
| 0800000a | 01c09800 | 80484510 | 89090e30 | 003c10e4 | 0010c000 |
| 0080cc00 | 00001800 | 00404100 | 018000f0 | 0d00800c | 40019004 |
| 00009800 | 038a0120 | 04081080 | 101eca0c | 012a0020 | 8200000e |
| 19e02000 | 80205003 | c4080020 | 1c148e50 | 27800040 | 0c50001c |
| 50040400 | 40000102 | 0e000200 | 10050070 | 00400208 | 40460054 |
| c1780000 | c000a0c2 |          |          |          |          |

&gt;D00300

|          |          |          |          |          |          |
|----------|----------|----------|----------|----------|----------|
| 00000000 | 00000000 | 00000100 | 80010600 | 00000090 | 00004000 |
| 00000000 | 01000000 | 00000100 | 00080840 | 08201000 | 40008000 |
| 00000000 | 00010000 | 00001008 | 02080008 | 00000000 | 02000000 |
| 00000000 | 00000000 | 00000000 | 08000020 | 12000000 | 00400010 |
| 00000400 | a0002000 | 00080000 | 40000000 | 00000280 | 00060002 |
| 40000000 | 00000600 |          |          |          |          |

&gt;D00298

|          |          |          |          |          |          |
|----------|----------|----------|----------|----------|----------|
| 00000040 | 81000000 | 00000100 | 00810300 | 80280040 | 00000800 |
| 00002880 | 08000440 | 01202000 | 01100028 | 40000100 | 40008000 |

|          |          |          |          |          |          |
|----------|----------|----------|----------|----------|----------|
| 00028000 | 02800001 | 00080400 | 00289008 | 00820010 | 00000000 |
| 1341e010 | 00002001 | 00100020 | 01000a80 | 05008000 | 08000010 |
| 00001400 | 00000400 | 00404000 | a4000020 | 00000200 | 01000002 |
| 24a20000 | 00800010 |          |          |          |          |

&gt;D00294

|          |          |          |          |          |          |
|----------|----------|----------|----------|----------|----------|
| 02008016 | 00822008 | 21000000 | 01b10600 | 00080003 | 00010210 |
| 10000010 | 00002c01 | 00800010 | 00080843 | 80006004 | 62008840 |
| 0202000c | 40000209 | 802000c0 | 00000008 | 21002d00 | 00000000 |
| 03500400 | 01046000 | c0002000 | 39010102 | 20000004 | 08520008 |
| 02086000 | 08100044 | 41880420 | 08000c2c | 00080400 | 22860000 |
| 04004100 | 06130160 |          |          |          |          |

&gt;D00293

|          |          |          |          |          |          |
|----------|----------|----------|----------|----------|----------|
| 0000c002 | 06440000 | 00200160 | 0c010600 | 40000062 | 04080164 |
| 14000002 | 01240005 | 00000300 | 20090e45 | 08280024 | 4000ac00 |
| 02108006 | 00108800 | 80060140 | 00180002 | 0224c800 | 03400003 |
| 08008000 | 00000000 | 40102010 | 3c000740 | 20002003 | 00400012 |
| 10002881 | a0000000 | 40080018 | 45001080 | 08088098 | 00068403 |
| c0000080 | 22020600 |          |          |          |          |

&gt;D00285

|          |          |          |          |          |          |
|----------|----------|----------|----------|----------|----------|
| 18000013 | 42802008 | 211a018a | 4ab90610 | 0a00101a | 00484040 |
| 4204a000 | 01002800 | 00460100 | 00080840 | 28002004 | 6000b000 |
| 00044602 | 20001041 | 812a1041 | 000c800e | 00012400 | 02000405 |
| 00480000 | 50326a01 | c0802000 | 2e001c00 | a0840840 | 084a0098 |
| 00040000 | 80000000 | 02120020 | 4841004d | 0000068a | 2046000a |
| 40000000 | 600104e0 |          |          |          |          |

&gt;D00283

|          |          |          |          |          |          |
|----------|----------|----------|----------|----------|----------|
| 08208246 | 01840000 | 00100100 | 0c210600 | 00020001 | 80100004 |
| 18c00010 | 02301044 | 10012700 | 8003c843 | 12202004 | 44018c30 |
| 0200080e | c010a809 | 040604c0 | 18180080 | 04658808 | 13084002 |
| 09000002 | 30801200 | 40022000 | 38028100 | e3004020 | 02401000 |
| 01082000 | c8000180 | 42880410 | 9d011880 | 08888918 | 01a60000 |
| 40040081 | 52020200 |          |          |          |          |

&gt;D00279

|          |          |          |          |          |          |
|----------|----------|----------|----------|----------|----------|
| 04008000 | 00000008 | 20000008 | 00010200 | 00001000 | 00000000 |
| 02000000 | 00000040 | 00002000 | 00000840 | 00040000 | 4000d800 |
| 02808006 | 00000000 | 01200001 | 00080008 | 00020000 | 80000400 |
| 00000002 | 00020000 | 00000020 | 08000b00 | 05000000 | 08000010 |
| 00002400 | 00000000 | 00100008 | 00800020 | 00000200 | 00020000 |
| 00000000 | 00020000 |          |          |          |          |

&gt;D00274

|          |          |          |          |          |          |
|----------|----------|----------|----------|----------|----------|
| 0400800a | 89005c08 | 20100108 | 82010700 | 00101080 | 02020110 |
| 06000000 | 22001400 | 00000000 | 001009e8 | 08200004 | 50018800 |
| 02808806 | 08001000 | 81081441 | 00082008 | 10200000 | 02000400 |
| 00c00000 | 00420601 | 40000000 | 180a8700 | 33001080 | 0050001c |
| 00002001 | c0000400 | 00900a00 | 90000001 | 00000300 | 00068811 |
| a4040000 | 00022a40 |          |          |          |          |

&gt;D00270

|          |          |          |          |          |          |
|----------|----------|----------|----------|----------|----------|
| 0020c002 | 00820200 | 00120000 | 01100600 | 20040000 | 08002000 |
| 08010010 | 00000000 | 00022000 | 00400d60 | 00244004 | 61008800 |
| 02000004 | 00000001 | 20020040 | 02000002 | 04841000 | 20000000 |
| 08200002 | 02024000 | e2100000 | 18000900 | 20800000 | 00180019 |
| 00006401 | 10000100 | 12204010 | 00000080 | 00008200 | 01060010 |
| 0000a000 | 00030220 |          |          |          |          |

&gt;D00252

|          |          |          |          |          |          |
|----------|----------|----------|----------|----------|----------|
| 00000006 | 00000000 | 42000100 | 00010e00 | 00000000 | 04000002 |
| 80000090 | 00122449 | 00002004 | 00400840 | 00280104 | 40008000 |
| 00008000 | 00100000 | 80020042 | 00020002 | 00044610 | 02400000 |
| 08001002 | 00000100 | 40200000 | 18060400 | 20022010 | 00408000 |
| 00100800 | 82000000 | 02432018 | 40009280 | 00408000 | 00260c21 |
| 04000084 | 00004200 |          |          |          |          |

&gt;D00251

|          |          |          |          |          |          |
|----------|----------|----------|----------|----------|----------|
| 00010000 | 01005000 | 00100000 | 00100400 | 00080080 | 00000010 |
| 00000000 | 20000000 | 00000000 | 00000080 | 00200000 | 40013000 |
| 06008012 | 01040000 | 80080000 | 00080008 | 10000000 | 00000000 |
| 00400000 | 00400201 | 40000000 | 10040e00 | 03000200 | 00100018 |
| 00000000 | 00000000 | 00000000 | 10000000 | 00000000 | 00040021 |
| 20004000 | 01012200 |          |          |          |          |

&gt;D00234

|          |          |          |          |          |          |
|----------|----------|----------|----------|----------|----------|
| 00000006 | 01800608 | 20100108 | 02010600 | 000c1040 | 00004012 |
| 02048000 | 20101000 | 00100190 | 200809e0 | 0920800c | 50018000 |
| 00001802 | 00401000 | 012000c1 | 000c000c | 00000000 | 02004100 |
| 00600000 | 00b20201 | c0000000 | 5c208030 | 21800841 | 81700010 |
| 00000000 | 80000000 | 02128000 | 10000001 | 05000218 | 0046981a |
| 400c1000 | 00002680 |          |          |          |          |

&gt;D00231

|          |          |          |          |          |          |
|----------|----------|----------|----------|----------|----------|
| 00002002 | 00800800 | 00004100 | 00000230 | 00041004 | 04000040 |
| 00000000 | 00000000 | 06000000 | 40000060 | 04000004 | 60000000 |



|          |          |          |          |          |          |
|----------|----------|----------|----------|----------|----------|
| 80018800 | 00200000 | 00100000 | 80040004 | 00020000 | 0200000c |
| 04200000 | 00000002 | 40000000 | 88028000 | 30804000 | 00500418 |
| 00040001 | 40080000 | 08000200 | 00000040 | 00400000 | 00460000 |
| 00000000 | 000000a0 |          |          |          |          |

&gt;D00227

|          |          |          |          |          |          |
|----------|----------|----------|----------|----------|----------|
| 0000002a | 00801800 | 00080000 | 02010600 | 00080040 | 0000c000 |
| 00008000 | 00000000 | 06400100 | 800000a0 | 0c00800c | 40000000 |
| 00009000 | 00400000 | 00280080 | 000c000c | 00800000 | 00008000 |
| 00400000 | 00000000 | 80000100 | 30000040 | 21800041 | 00300004 |
| 00040000 | c0200000 | 60000000 | 00040000 | 00004000 | 00460000 |
| c0000000 | 00000280 |          |          |          |          |

&gt;D00225

|          |          |          |          |          |          |
|----------|----------|----------|----------|----------|----------|
| 0080800a | 06840019 | 402c0500 | 98010780 | 41000040 | 00880026 |
| 14840000 | 01201401 | 10000300 | 00090845 | 09010134 | 44068c00 |
| 02100884 | 08088a08 | 80068940 | 080c258c | 0a208800 | 020a0207 |
| 00600408 | 00260000 | 40122000 | 2801a100 | 61001002 | 08508110 |
| 10802010 | e00005c0 | 40084040 | 45021001 | 0000009c | 00860c02 |
| c00c0080 | a4360400 |          |          |          |          |

&gt;D00224

|          |          |          |          |          |          |
|----------|----------|----------|----------|----------|----------|
| 0000400a | 00000018 | 60001000 | 00000600 | 00080040 | 0000c008 |
| 04000000 | 00000000 | 00000100 | 00000040 | 01000004 | 08000000 |
| 00000006 | 00000000 | 00000000 | 000c000c | 00000000 | 00000008 |
| 00600000 | 40260000 | 40020000 | 08000020 | 21800840 | 00000000 |
| 00104000 | 00000000 | 08020000 | 00000000 | 00000000 | 00420000 |
| 40000000 | 082004a0 |          |          |          |          |

&gt;D00222

|          |          |          |          |          |          |
|----------|----------|----------|----------|----------|----------|
| 0000000a | 00c01800 | 00080000 | 80000600 | 00080040 | 0000c100 |
| 0000bc04 | 00000800 | 06400100 | 810000f0 | 0c00800c | 40009000 |
| 00009000 | 00480000 | 00081080 | 101c000c | 00200020 | 00008000 |
| 10400000 | 00201000 | 80080100 | 1c000040 | 25800840 | 08300804 |
| 00000000 | c0200002 | 60000200 | 10040040 | 00004208 | 00461000 |
| c0200000 | 80000280 |          |          |          |          |

&gt;D00219

|          |          |          |          |          |          |
|----------|----------|----------|----------|----------|----------|
| 00000010 | 01801800 | 01100100 | 02b10e00 | 00000008 | 00000000 |
| 08000000 | 00003000 | 00000000 | 000828c0 | 08202000 | e0018400 |
| 00009000 | 00000041 | 80200000 | 00000000 | 02002000 | 02000001 |
| 02402000 | 00006001 | 80002000 | 18070610 | 00000000 | 0850001c |
| 00000000 | 80000000 | 80000000 | 1000042c | 00000400 | 20060003 |
| 80080000 | 00010660 |          |          |          |          |

## &gt;D00218

|          |          |          |          |          |          |
|----------|----------|----------|----------|----------|----------|
| 00440000 | 00040009 | 00000040 | 00380400 | 00000000 | 00800401 |
| 00028100 | 10000010 | 00000100 | 10808002 | 00302000 | 40000480 |
| 90008404 | 00060001 | 80042000 | 0000400d | 40000000 | 00004200 |
| 00020020 | 00204000 | 00000080 | 00301690 | 20400000 | 00008000 |
| 20000000 | 2c000000 | 24000004 | 0001044c | 10000008 | 00050009 |
| 00040200 | 00010268 |          |          |          |          |

## &gt;D00217

|          |          |          |          |          |          |
|----------|----------|----------|----------|----------|----------|
| 00004002 | 00000008 | 20000000 | 00000600 | 00000000 | 00000000 |
| 02000000 | 00000000 | 00000000 | 00000840 | 00280004 | 40008000 |
| 00008022 | 00100000 | 00000040 | 00000008 | 00040000 | 00000000 |
| 08000000 | 00020000 | 40100000 | 08000600 | 20002000 | 00000000 |
| 00000000 | 00000000 | 00040000 | 00000080 | 00008000 | 00060001 |
| 00000000 | 00000200 |          |          |          |          |

## &gt;D00216

|          |          |          |          |          |          |
|----------|----------|----------|----------|----------|----------|
| 00000050 | 81008020 | 00101800 | 80810500 | 803800c0 | 00000000 |
| 00103800 | 28000442 | 00206000 | 011000a8 | 00200200 | c0018000 |
| 00020102 | 02810004 | 0028140c | 002b9108 | 30800040 | 00000120 |
| 13c1a010 | 00002201 | 00100020 | 10000010 | 17008080 | 08100010 |
| 10001401 | 00008c00 | 00484200 | b4000021 | 00000202 | 00040000 |
| 04a20000 | 02002a00 |          |          |          |          |

## &gt;D00208

|          |          |          |          |          |          |
|----------|----------|----------|----------|----------|----------|
| 00470002 | 09400421 | 00100910 | 04490f00 | 401c0080 | 04338014 |
| 000803a1 | a2000402 | 11800600 | 01100188 | 00300600 | 4501b020 |
| 0e02821a | 01812101 | 80101414 | 001a0048 | 10a34000 | 01080166 |
| 01e72010 | 00028221 | 00000801 | b0001ef0 | 1300a0e1 | 02100a10 |
| 04a00007 | 20000002 | 00426a00 | 90040521 | 1c100200 | 0044141e |
| a6034004 | 40802a00 |          |          |          |          |

## &gt;D00203

|          |          |          |          |          |          |
|----------|----------|----------|----------|----------|----------|
| 00050440 | 81040000 | 00000100 | 80810700 | c03c0140 | 00a00001 |
| 02002800 | 08000400 | 00200000 | 011000a8 | 40000200 | 40009000 |
| 1c028028 | 028a0000 | 00000404 | 002a900c | 00a20000 | 00000000 |
| 31c0a090 | 00002001 | 00100020 | 10000a00 | 07408000 | 08000012 |
| 00001400 | 00000000 | 00404000 | a4000020 | 00000240 | 0004000a |
| 24e20000 | 04000010 |          |          |          |          |

## &gt;D00198

|          |          |          |          |          |          |
|----------|----------|----------|----------|----------|----------|
| 0005000b | 4100c808 | 2210050a | 51010f10 | 203c1020 | 00300002 |
| c7042080 | 22003449 | 01c02880 | 010908d0 | 48318004 | 50919000 |

|          |          |          |          |          |          |
|----------|----------|----------|----------|----------|----------|
| 1c00c8da | 01e08000 | 01020463 | 020c910c | 00820600 | 06000126 |
| 3369a418 | 00060a01 | 40120120 | 18218a18 | 25804001 | 99500010 |
| 00143400 | c0000001 | 08426200 | d00004a0 | 04400306 | 0086010a |
| 24060200 | 20246f30 |          |          |          |          |

&gt;D00196

|          |          |          |          |          |          |
|----------|----------|----------|----------|----------|----------|
| 00004026 | 42000208 | 60100108 | 00010e00 | 20001000 | c0002012 |
| 02002004 | 00002009 | 04200a80 | 000808c0 | 08300004 | 40028000 |
| 00009222 | 20000000 | 01030141 | 00140008 | 00068000 | 82400020 |
| 08080018 | 00020241 | 40100100 | 18218c10 | 30020000 | 81402011 |
| 00151000 | 80010002 | 00040000 | 90001080 | 04008200 | 0006080b |
| 00080080 | 30004600 |          |          |          |          |

&gt;D00188

|          |          |          |          |          |          |
|----------|----------|----------|----------|----------|----------|
| 00000400 | 81040000 | 00000000 | 00000000 | 40080000 | 00000001 |
| 00000000 | 00000400 | 00000000 | 00100008 | 00000200 | 40000000 |
| 00020000 | 00800000 | 00000404 | 0008000c | 00000000 | 00000000 |
| 02402080 | 00000001 | 00000000 | 00000000 | 01008000 | 00000012 |
| 00000000 | 00000000 | 00404000 | 80000000 | 00000000 | 01000000 |
| 24820000 | 04000000 |          |          |          |          |

&gt;D00187

|          |          |          |          |          |          |
|----------|----------|----------|----------|----------|----------|
| 00000400 | 81040000 | 00000000 | 00000000 | 40080000 | 00000001 |
| 00000000 | 00000402 | 00000000 | 00100008 | 00000200 | 40000000 |
| 00020000 | 00800000 | 00000404 | 0008000c | 00000000 | 00000000 |
| 02402080 | 00000001 | 00000000 | 00000000 | 01008000 | 00000012 |
| 00200000 | 00000000 | 00404000 | 80000000 | 00000000 | 01000000 |
| 24820000 | 04000000 |          |          |          |          |

&gt;D00186

|          |          |          |          |          |          |
|----------|----------|----------|----------|----------|----------|
| 00004002 | 00809800 | 00104320 | 06010610 | 00041002 | 0000c070 |
| 00008000 | 00000000 | 02000100 | c0000ac0 | 00200004 | 50018000 |
| 00008802 | 01603000 | 000000c0 | 000c000d | 00040400 | 82004004 |
| 08200000 | 00400000 | c0100000 | 38068a78 | 60800024 | 8250001e |
| 00040000 | 80000000 | 08008080 | 10040081 | 08408000 | 00078040 |
| c0040000 | 00000240 |          |          |          |          |

&gt;D00185

|          |          |          |          |          |          |
|----------|----------|----------|----------|----------|----------|
| 00000000 | 63000008 | 20000102 | 00010200 | 00080000 | 40000002 |
| 02000000 | 00000001 | 00000800 | 00080840 | 08100000 | 40008000 |
| 00000002 | 02a00000 | 00000020 | 00080008 | 00000200 | 02000000 |
| 02402000 | 00020201 | 00000100 | 08000000 | 05004000 | 00400010 |
| 00000000 | 80000001 | 00120000 | 00000000 | 00000002 | 01020002 |
| 00020000 | 00000400 |          |          |          |          |

&gt;D00184

|          |          |          |          |          |          |
|----------|----------|----------|----------|----------|----------|
| 00010000 | 81007000 | 00100000 | 04000400 | 00000080 | 00000000 |
| 00000000 | 20000408 | 00000000 | 00100080 | 00200000 | 40013000 |
| 1602800a | 00002001 | 80180400 | 00080008 | 10000000 | 00000000 |
| 00c12000 | 00002201 | 00000000 | 30040610 | 03008083 | 02100018 |
| 00000001 | 00000000 | 00404000 | 90000000 | 08000000 | 00040001 |
| 24004000 | 00002200 |          |          |          |          |

&gt;D00183

|          |          |          |          |          |          |
|----------|----------|----------|----------|----------|----------|
| 00000002 | 01809800 | 00004100 | 10010610 | 00041022 | 0000c040 |
| 00000000 | 00000000 | 02000100 | c00000c0 | 0100000c | 40018800 |
| 00009800 | 00f00000 | 00020040 | 020c000c | 00000000 | 8200c004 |
| 00600000 | 40200000 | c0000000 | 18068a78 | 21800001 | 8050010c |
| 00040000 | 80000000 | 08000040 | 10040000 | 00400005 | 00460040 |
| c00c0000 | 40000088 |          |          |          |          |

&gt;D00169

|          |          |          |          |          |          |
|----------|----------|----------|----------|----------|----------|
| 00008002 | 00000800 | 00000100 | 00010200 | 00000000 | 00014020 |
| 00000010 | 08000040 | 00802100 | 00000851 | 00210004 | 40009800 |
| 06008004 | 00000400 | 00020040 | 00080008 | 00040000 | 02000000 |
| 0800800a | 00000000 | 41000000 | 08020b20 | 20000000 | 00400004 |
| 00042000 | 80000600 | 02040000 | 00001080 | 00408008 | 00260000 |
| c0000000 | 00020800 |          |          |          |          |

&gt;D00168

|          |          |          |          |          |          |
|----------|----------|----------|----------|----------|----------|
| 00000002 | 01400000 | 80000000 | 88090600 | 003800e0 | 00004140 |
| 00009400 | 00000800 | 04000102 | 818000b0 | 0400000c | 40019004 |
| 00009000 | 03c80110 | 00281080 | 001ec00c | 00200000 | 00000000 |
| 09c00000 | 00201001 | 80080020 | 18000010 | 27800041 | 0c600810 |
| 10000400 | 40000002 | 00000200 | 10000070 | 00000208 | 01460000 |
| 40280000 | 000000c0 |          |          |          |          |

&gt;D00160

|          |          |          |          |          |          |
|----------|----------|----------|----------|----------|----------|
| 00010000 | 01000000 | 00000000 | 00000400 | 00080000 | 00000000 |
| 00000000 | 00000000 | 00000000 | 00000080 | 00000000 | 40011000 |
| 04008008 | 00800000 | 00000000 | 00080008 | 00000000 | 00000000 |
| 00402000 | 00000001 | 00000000 | 10000a10 | 01000000 | 00000010 |
| 00000000 | 00000000 | 00000000 | 00000000 | 00000000 | 00040000 |
| 00000000 | 00000000 |          |          |          |          |

&gt;D00158

|          |          |          |          |          |          |
|----------|----------|----------|----------|----------|----------|
| 0000000a | 00004800 | 00001100 | 50010600 | 000000e0 | 00080000 |
| 00000000 | 01101100 | 00000100 | 000808c0 | 08088024 | 40819800 |

|          |          |          |          |          |          |
|----------|----------|----------|----------|----------|----------|
| 03008000 | 00100000 | 40060400 | 000c008c | 18008000 | 02000005 |
| 00200000 | 00000000 | 00000000 | 18068a00 | 21802000 | 0044041c |
| 00000000 | e0000080 | 08000010 | 40001000 | 00080084 | 00060043 |
| 80007200 | 20000c00 |          |          |          |          |

&gt;D00155

|          |          |          |          |          |          |
|----------|----------|----------|----------|----------|----------|
| 19004446 | 31401080 | 00502800 | 81810438 | 041a03e2 | 00008401 |
| 00502880 | 04800842 | 00600340 | 018d02b6 | 34a08008 | 44019a20 |
| 00001600 | 03981108 | 150a1080 | 105c800c | 00209828 | 8b400020 |
| 1bd05010 | e4201041 | 86082820 | 11a12050 | 27000015 | 18700414 |
| 112d1410 | 60008202 | 40810000 | 10021060 | 0400061d | 00c60800 |
| c0080000 | 20008308 |          |          |          |          |

&gt;D00153

|          |          |          |          |          |          |
|----------|----------|----------|----------|----------|----------|
| 00010042 | 01000020 | 00000100 | 00490300 | c0080000 | 04000000 |
| 00000080 | 02000402 | 01000000 | 00100000 | 00100000 | 40009000 |
| 04028028 | 00800000 | 00000410 | 00081008 | 00820000 | 00000020 |
| 02412000 | 00020001 | 00000021 | 00000a80 | 01008000 | 00000810 |
| 00200400 | 00000000 | 00404000 | 80000000 | 00000200 | 00000002 |
| 24020000 | 00000000 |          |          |          |          |

&gt;D00148

|          |          |          |          |          |          |
|----------|----------|----------|----------|----------|----------|
| 00000002 | 01000828 | 00000102 | 00090200 | 20000000 | 0080800a |
| 20000001 | 00000403 | 81000800 | 00980840 | 08100000 | 40009000 |
| 04028000 | 00200000 | 00000420 | 00080000 | 00000604 | 02100020 |
| 00312000 | 02020801 | 00400101 | 080202c0 | 0010c000 | 00400814 |
| 01200000 | 84002001 | 00404000 | 80000000 | 00000000 | 80220002 |
| a4024000 | 00000410 |          |          |          |          |

&gt;D00145

|          |          |          |          |          |          |
|----------|----------|----------|----------|----------|----------|
| 08000003 | 42000008 | 20000188 | 08090610 | 02001008 | 00084000 |
| 4204a000 | 01000800 | 00400100 | 00080840 | 28000004 | 4000b000 |
| 00004002 | 20000000 | 01020001 | 000c800c | 00010000 | 02000005 |
| 00480000 | 40220a00 | 00000000 | 0c000400 | 20800840 | 00420010 |
| 00040000 | 80000000 | 00120000 | 40000000 | 00000288 | 0046000a |
| 40000000 | 200004c0 |          |          |          |          |

&gt;D00142

|          |          |          |          |          |          |
|----------|----------|----------|----------|----------|----------|
| 1003c00a | 01a05800 | 00180902 | 98090e30 | 0a1a10c8 | 0010c000 |
| 0000e000 | 22001801 | 10400100 | 000208c0 | 41210004 | 4000b000 |
| 06008822 | 02108000 | 008e0440 | 100c010c | 18040000 | 02000000 |
| 08400000 | 40200201 | 40100000 | 1c068e40 | 23810840 | 0040001c |
| 00140000 | c0000001 | 08008000 | 9000008c | 0000810c | 00461801 |
| e0044000 | 80800ac0 |          |          |          |          |

## &gt;D00141

|          |          |          |          |          |          |
|----------|----------|----------|----------|----------|----------|
| 0000800a | 00000a08 | 20100188 | 50010718 | 00045060 | 00000000 |
| 060c2000 | 00001000 | 80500000 | 000808c0 | 08000004 | 4001b800 |
| 03008866 | 00608000 | c10e0041 | 020c000c | 18810000 | 83800004 |
| 01280400 | 00020200 | 40000000 | 18028f18 | 21804000 | 81500014 |
| 00042000 | c0000100 | 08160000 | 10000000 | 04000204 | 0006084b |
| 80042200 | 00020420 |          |          |          |          |

## &gt;D00139

|          |          |          |          |          |          |
|----------|----------|----------|----------|----------|----------|
| 08000000 | 00200008 | 24080008 | 00000200 | 00011a14 | 00400020 |
| 02400000 | 40200200 | 02024000 | 40000840 | 00000000 | 00408000 |
| 4000c402 | 00200080 | 01000081 | 00000009 | 00000000 | 00000000 |
| 08000000 | 00020002 | 00000000 | 08000408 | 00000008 | 00180000 |
| 08400100 | 00000000 | 00000050 | 08100000 | 0a002200 | 01020000 |
| 00000000 | 00000000 |          |          |          |          |

## &gt;D00136

|          |          |          |          |          |          |
|----------|----------|----------|----------|----------|----------|
| 00028000 | 01000a00 | 00100102 | 02010600 | 00000000 | 00004010 |
| 00000000 | 20000000 | 00100900 | 000808c0 | 08300000 | 50019800 |
| 060080a6 | 00201000 | 00200000 | 000c0008 | 00000000 | 02000080 |
| 00800000 | 00100201 | 00000100 | 18020320 | 01000080 | 00500014 |
| 00002001 | 80000000 | 00040000 | 10000001 | 00000000 | 0006800a |
| c0000000 | 00822600 |          |          |          |          |

## &gt;D00132

|          |          |          |          |          |          |
|----------|----------|----------|----------|----------|----------|
| 00000000 | 00000800 | 00000100 | 00010200 | 00000041 | 00000000 |
| 00000000 | 01000000 | 00000000 | 00080a40 | 08000000 | 40009200 |
| 01008000 | 00000000 | 40040000 | 08080008 | 08000000 | 02000000 |
| 00000000 | 00000000 | 00000000 | 08020a00 | 01000000 | 00400014 |
| 00000000 | a0000000 | 00000000 | 40804004 | 00000080 | 00020002 |
| 80002000 | 00000400 |          |          |          |          |

## &gt;D00131

|          |          |          |          |          |          |
|----------|----------|----------|----------|----------|----------|
| 00000000 | 00000010 | 00004000 | 40100400 | 00000400 | 00000108 |
| 00000000 | 20000000 | 00200000 | 04000000 | 00200000 | 40000000 |
| 00801082 | 00080000 | 00000000 | 00000000 | 00000000 | 00000200 |
| 00000000 | 00040200 | 00020080 | 00000000 | 00000000 | 00004000 |
| 00000800 | 00000000 | 00000000 | 04000000 | 00200000 | 00040000 |
| 00080000 | 00010208 |          |          |          |          |

## &gt;D00130

|          |          |          |          |          |          |
|----------|----------|----------|----------|----------|----------|
| 00002000 | 00000808 | 20100100 | 02010200 | 00800001 | 00024010 |
| 02000000 | 00000800 | 00000100 | 00010840 | 00000000 | c0008000 |

|          |          |          |          |          |          |
|----------|----------|----------|----------|----------|----------|
| 00008012 | 00001000 | 00000000 | 08082008 | 00020200 | 02001000 |
| 04000000 | 40120000 | 00000000 | 08020a20 | 10000000 | 00400004 |
| 00000000 | 80000000 | 00020000 | 00000041 | 10014000 | 00028000 |
| c0000000 | 00000200 |          |          |          |          |

&gt;D00127

|          |          |          |          |          |          |
|----------|----------|----------|----------|----------|----------|
| 00424292 | 80808000 | 05484120 | 11f10601 | 000c8001 | 00104208 |
| 80030090 | 00046c00 | 81800580 | 20508a40 | 00386204 | 6020a008 |
| a010a800 | 0011a103 | 8030c002 | 001c900c | 20042c80 | 12004101 |
| 08678020 | 90a36400 | c0140000 | 3e008ea1 | 20886800 | 2860002a |
| 02002000 | 8c20800d | 40442090 | 400501cc | 0842d418 | 20161803 |
| d400500a | 403103e8 |          |          |          |          |

&gt;D00126

|          |          |          |          |          |          |
|----------|----------|----------|----------|----------|----------|
| 00000000 | 00000000 | 00000100 | 00010200 | 00000040 | 00000000 |
| 00000000 | 00000000 | 00000900 | 00080840 | 08100000 | 40009800 |
| 01008000 | 00000000 | 40040000 | 00080008 | 08000000 | 02000000 |
| 00000000 | 00000001 | 00000100 | 08000a00 | 01000000 | 00400010 |
| 00000000 | 80000000 | 00000000 | 00000000 | 00000000 | 00020002 |
| 00002000 | 00000400 |          |          |          |          |

&gt;D00125

|          |          |          |          |          |          |
|----------|----------|----------|----------|----------|----------|
| 00050041 | 6b000008 | a000010a | 00810300 | 88281050 | 4000440e |
| 43943c00 | 0d000041 | 00202b00 | 01080868 | 4c100000 | 40009800 |
| 0400c002 | 22a10000 | 01080025 | 022a9108 | 00820200 | 02000104 |
| 1358a008 | 00020a03 | 00140720 | 18002a20 | 05004040 | 08420410 |
| 40000c00 | e0002201 | 005a0000 | 64000020 | 03000283 | 0002000a |
| 40a00000 | 02410400 |          |          |          |          |

&gt;D00501

|          |          |          |          |          |          |
|----------|----------|----------|----------|----------|----------|
| 0001002a | 01801800 | 00080000 | 02010700 | 00080040 | 0000c040 |
| 00008000 | 00000000 | 06400100 | 800000a0 | 0c00800c | 40011000 |
| 04009010 | 00c00000 | 00280080 | 000c000c | 00800000 | 00088000 |
| 00402000 | 00000001 | 80000100 | 10000250 | 21800041 | 00300014 |
| 00040000 | c0200000 | 60000000 | 00040000 | 00004000 | 00460000 |
| c0080000 | 00000280 |          |          |          |          |

&gt;D00496

|          |          |          |          |          |          |
|----------|----------|----------|----------|----------|----------|
| 00000000 | 00000000 | 00000000 | 00100400 | 00000000 | 00000000 |
| 00000000 | 00000000 | 00000000 | 00000000 | 00000000 | 40003000 |
| 04008000 | 00040000 | 00000000 | 00080008 | 00000000 | 00000000 |
| 00400000 | 00400001 | 00000000 | 10000a00 | 03000400 | 00000010 |
| 00000000 | 00000000 | 00000000 | 00000000 | 00000000 | 00040000 |
| 00000000 | 03010000 |          |          |          |          |

&gt;D00494

|          |          |          |          |          |          |
|----------|----------|----------|----------|----------|----------|
| 00204002 | 00820200 | 00120020 | 00100600 | 20040000 | 00002000 |
| 00010010 | 00000000 | 00022000 | 00400e40 | 00244004 | 61008000 |
| 00000000 | 00002000 | 20020040 | 02000002 | 04841000 | 20000000 |
| 08200002 | 02020000 | c2100000 | 38000000 | 20800000 | 0018001b |
| 00004401 | 10000300 | 02204010 | 00000080 | 08008200 | 01060000 |
| 0000a000 | 00010220 |          |          |          |          |

&gt;D00488

|          |          |          |          |          |          |
|----------|----------|----------|----------|----------|----------|
| 00008002 | 00000801 | 00000180 | 480d0610 | 0700000c | 00004008 |
| 0000a000 | 00080800 | 00400100 | 000c0840 | 00008004 | 40009800 |
| 02000004 | 00300000 | 20020000 | 800c0004 | 00020800 | 02002000 |
| 04400000 | 40200000 | 00000000 | 0c000100 | 20804840 | 00400110 |
| 00842001 | 80080200 | 00040200 | 00000040 | 0001400c | 00460003 |
| 40000800 | 210200e0 |          |          |          |          |

&gt;D00487

|          |          |          |          |          |          |
|----------|----------|----------|----------|----------|----------|
| 00000002 | 00000008 | 60004008 | 00000600 | 00041010 | 00000004 |
| 04080000 | 00200000 | 0c000200 | 000000c0 | 00200004 | 00050000 |
| 00008804 | 08000000 | 01030000 | 0014000c | 00020000 | 00002000 |
| 00200000 | 00060200 | 40000000 | 18008c10 | 30800000 | 0000a000 |
| 00002400 | 00110002 | 00004400 | 00000000 | 00000200 | 00060001 |
| 00000008 | 30000000 |          |          |          |          |

&gt;D00475

|          |          |          |          |          |          |
|----------|----------|----------|----------|----------|----------|
| 00000010 | 00801800 | 01100100 | 01b10600 | 00080008 | 00004000 |
| 00000000 | 00000000 | 00000100 | 00400840 | 00202000 | 60008000 |
| 00008002 | 00000001 | 80200000 | 00080008 | 00002000 | 02000001 |
| 00400000 | 00006600 | 80000000 | 18120a20 | 00000000 | 1840001c |
| 02000000 | 80000004 | 00000000 | 0000002c | 00000400 | 20060000 |
| c0000000 | 00012260 |          |          |          |          |

&gt;D00463

|          |          |          |          |          |          |
|----------|----------|----------|----------|----------|----------|
| 0040000a | 00001011 | 80080100 | 10210250 | 00000001 | 10004008 |
| 00000400 | 008c0044 | 00004100 | 48020850 | 00008881 | 50019802 |
| 04008480 | 00200008 | 20020020 | 800d000c | 00028000 | 07002800 |
| 04400218 | 40008009 | 04201000 | 08000a28 | 21004080 | 04500230 |
| 00040001 | a0084201 | 04000208 | 18041040 | 80004004 | 02a30010 |
| 400408a0 | 20000000 |          |          |          |          |

&gt;D00459

|          |          |          |          |          |          |
|----------|----------|----------|----------|----------|----------|
| 00018008 | 01805200 | 02100102 | 94010700 | 200800a0 | 00000000 |
| 01001000 | 22001004 | 00400880 | 000908d0 | 08302000 | 5001b000 |



|          |          |          |          |          |          |
|----------|----------|----------|----------|----------|----------|
| 060088c2 | 00202003 | 80181488 | 000c1008 | 10820200 | 02000020 |
| 00400008 | 00000201 | 80020120 | 38208e00 | 33004041 | 83400018 |
| 00000c00 | c0000001 | 08004000 | 90000001 | 0c000300 | 0086000b |
| 20044000 | 00422600 |          |          |          |          |

&gt;D00455

|          |          |          |          |          |          |
|----------|----------|----------|----------|----------|----------|
| 00000002 | 44008028 | 2000652a | 10502211 | 00041060 | 00004000 |
| 16080104 | 00000008 | 04020100 | 0001485d | 01008004 | 42008000 |
| 00001806 | 40640000 | 81020041 | 022e200c | 24000008 | 0200030c |
| 80280820 | 00064000 | 42100002 | 1800aa20 | 21800000 | 01480000 |
| 00242000 | 90018000 | 48000048 | 00000000 | 00400304 | 00c60020 |
| 40080000 | 002580e0 |          |          |          |          |

&gt;D00454

|          |          |          |          |          |          |
|----------|----------|----------|----------|----------|----------|
| 08210246 | 43842800 | 02100904 | 0c200600 | 00120003 | 80100004 |
| 10c80190 | 10301054 | 10016600 | 80030843 | 12202204 | 440584b0 |
| 0000081a | c010a809 | 040634c0 | 18180088 | 08658809 | 1308401a |
| 09000002 | 30809281 | 40022000 | 78029080 | e7104120 | 02401000 |
| 03088000 | 4c000180 | 4a800410 | 9d011c84 | 08988918 | 01ae0000 |
| 20000081 | 50e10201 |          |          |          |          |

&gt;D00452

|          |          |          |          |          |          |
|----------|----------|----------|----------|----------|----------|
| 00010040 | 00000800 | 00000100 | 40010200 | 00000040 | 00000000 |
| 00000080 | 01002001 | 00000100 | 00480840 | 08000200 | c0009880 |
| 01008010 | 00000000 | 40042000 | 00080008 | 09010800 | 0200000a |
| 00100000 | 00000004 | 00000800 | 480a0a80 | 01000000 | 10400014 |
| 02000000 | a4000000 | 00000000 | 40000004 | 00000180 | 00020002 |
| 80002000 | 00c10400 |          |          |          |          |

&gt;D00451

|          |          |          |          |          |          |
|----------|----------|----------|----------|----------|----------|
| 00000002 | 04000820 | 00102100 | 41310610 | 00041000 | 00000000 |
| 00002004 | 00008000 | 00400100 | 00090844 | 0820240c | 40008800 |
| 10001820 | 00440001 | 80000040 | 0004000c | 00000018 | 02000104 |
| 00200400 | 00004000 | 40000000 | 18a08008 | 20800000 | 91400030 |
| 00042000 | 80000000 | 08000040 | 0000000c | 04400000 | 00060002 |
| 000c0200 | 00010660 |          |          |          |          |

&gt;D00449

|          |          |          |          |          |          |
|----------|----------|----------|----------|----------|----------|
| 00004006 | 04800200 | 007a0000 | 00900600 | 20000000 | 02002100 |
| 00000221 | 00000000 | 84004100 | 000049e8 | 0078000c | 70049000 |
| 0c018400 | 00340000 | a6220040 | 00000040 | 04040000 | 00000000 |
| 0c004034 | 00202001 | e0100000 | 1c000601 | 60806900 | 08240019 |
| 00002000 | 00000000 | 04000600 | 10000080 | 01008000 | 000e0013 |
| 10000000 | 01010328 |          |          |          |          |

&gt;D00448

|          |          |          |          |          |          |
|----------|----------|----------|----------|----------|----------|
| 00000012 | 00882808 | 61004102 | 00b10200 | 00050012 | 00024000 |
| 02000000 | 00000800 | 00000300 | 00040840 | 00002104 | 60008000 |
| 00048c02 | 08000001 | 80280050 | 102e200c | 0000a000 | 02800000 |
| 00600000 | 80226001 | c0000000 | 0e229a20 | 20840846 | 0860200c |
| 00050480 | c1000000 | 80040080 | 0400004c | 00500408 | 20060000 |
| c0000080 | 00010060 |          |          |          |          |

&gt;D00437

|          |          |          |          |          |          |
|----------|----------|----------|----------|----------|----------|
| 00410002 | 81000019 | 20200100 | 80030700 | 00080040 | 00900000 |
| 02002821 | 00000400 | 15400c00 | 009a0860 | 4e300004 | 40019000 |
| 0c03e0a2 | 02002000 | 20120140 | 10098159 | 00830008 | 03100000 |
| 00430018 | 06006801 | 40020101 | 08100a00 | 31048040 | 00c00890 |
| 84803800 | c0000000 | 00500000 | 90040101 | 00100200 | 80060203 |
| 04200000 | 64000610 |          |          |          |          |

&gt;D00434

|          |          |          |          |          |          |
|----------|----------|----------|----------|----------|----------|
| 00010040 | 81040020 | 00000900 | 80010300 | c0080040 | 00000001 |
| 00000000 | 00000402 | 00004000 | 01100008 | 00000200 | 40009000 |
| 14028028 | 00800004 | 00000404 | 0008100c | 00820000 | 00000020 |
| 03402080 | 0000a001 | 00000020 | 00001a00 | 0100a000 | 00000012 |
| 00200400 | 00000000 | 00406200 | 80000000 | 00000200 | 0000000a |
| 24020000 | 00000000 |          |          |          |          |

&gt;D00425

|          |          |          |          |          |          |
|----------|----------|----------|----------|----------|----------|
| 00000000 | 01000008 | 2000010a | 00010200 | 00001000 | 00000000 |
| 02000000 | 00000000 | 00000800 | 00080840 | 08100000 | 40009000 |
| 04008002 | 00200000 | 01000001 | 00000008 | 00000000 | 02000000 |
| 00000008 | 00020001 | 00000100 | 08000208 | 00000000 | 00400010 |
| 00000800 | 80000000 | 00000000 | 00000000 | 00000200 | 00020002 |
| 00000000 | 00000400 |          |          |          |          |

&gt;D00423

|          |          |          |          |          |          |
|----------|----------|----------|----------|----------|----------|
| 00000004 | 01400008 | c0100000 | 80010400 | 013800c0 | 00008004 |
| 00c00000 | 00000401 | 00000110 | 818000a0 | 08190028 | 44018810 |
| 00008000 | 03a00100 | 002a1080 | 001aa00c | 00008000 | 00000002 |
| 19d00000 | 00201201 | 80180020 | 10000650 | 27014000 | 0e000410 |
| 10200410 | 40000402 | 00000800 | 31020060 | 01000305 | 00040001 |
| 80000080 | 00008108 |          |          |          |          |

&gt;D00421

|          |          |          |          |          |          |
|----------|----------|----------|----------|----------|----------|
| 00010000 | 01005200 | 00100102 | 84010700 | 00080080 | 00000010 |
| 00000000 | 20000000 | 00000800 | 000808c0 | 08302000 | 4001b000 |

|          |          |          |          |          |          |
|----------|----------|----------|----------|----------|----------|
| 0600801a | 01a02003 | 80181008 | 000c1008 | 10820000 | 02000000 |
| 00402000 | 00000201 | 00000120 | 38040e10 | 13000001 | 02500018 |
| 00000400 | 80000000 | 00000000 | 10000001 | 08000200 | 0106000b |
| 20024000 | 00402600 |          |          |          |          |

&gt;D00418

|          |          |          |          |          |          |
|----------|----------|----------|----------|----------|----------|
| 01010002 | 01400001 | 00100000 | 48080600 | 22000008 | 00006100 |
| 0000a010 | 40100800 | 00000100 | 00000080 | 00200004 | 50011000 |
| 04000002 | 000000c0 | 00020080 | 000c0014 | 00041000 | 00014000 |
| 00400000 | 00200201 | 00902000 | 14060000 | 20804840 | 00100010 |
| 00080000 | 00100000 | 00000400 | 108000c0 | 00000008 | 00460000 |
| 40001000 | 000002c0 |          |          |          |          |

&gt;D00417

|          |          |          |          |          |          |
|----------|----------|----------|----------|----------|----------|
| 00002002 | 00000801 | 00004100 | 10000210 | 00041022 | 04010040 |
| 10000800 | 00000000 | 06000100 | 40810070 | 04000004 | 60800000 |
| 80018800 | 00200000 | 00120000 | 8204000c | 00420000 | 02001004 |
| 04a00000 | 00200002 | 40000000 | 88028000 | 30804401 | 02500418 |
| 00040001 | c0080000 | 08000640 | 00000041 | 00400004 | 00020000 |
| 00000000 | 00000220 |          |          |          |          |

&gt;D00416

|          |          |          |          |          |          |
|----------|----------|----------|----------|----------|----------|
| 00008002 | 00000200 | 80000100 | 80010600 | 00080050 | 00004020 |
| 00000000 | 00004000 | 00100100 | 000808c0 | 08009008 | 40018900 |
| 020010a4 | 00890400 | 00001080 | 020c800c | 00201000 | 02000200 |
| 10400000 | 00000000 | 80001408 | 18000120 | 23000000 | 85400010 |
| 00002400 | 80002200 | 000c0200 | 00000030 | 04000200 | 0046000a |
| 40080000 | 00020400 |          |          |          |          |

&gt;D00414

|          |          |          |          |          |          |
|----------|----------|----------|----------|----------|----------|
| 00010000 | 11800010 | c2004100 | 00010e00 | 10080000 | 00000004 |
| 00000080 | 0220b000 | 00000000 | 004808c0 | 09200200 | c0018080 |
| 00008810 | 00000020 | 00002080 | 00000010 | 00005001 | 02000008 |
| 00200000 | 0000000c | 80001800 | 48098488 | 00000080 | 00400018 |
| 02000402 | 84010000 | 00000000 | 80000004 | 00000340 | 00060007 |
| 00040000 | 80c10600 |          |          |          |          |

&gt;D00410

|          |          |          |          |          |          |
|----------|----------|----------|----------|----------|----------|
| 00008002 | 00804800 | 00004100 | 00800210 | 00041000 | 00000000 |
| 00002000 | 00000000 | 00400800 | 00080040 | 00100004 | 40001000 |
| 03008800 | 00000800 | 40000000 | 00040004 | 00000000 | 02000004 |
| 00200400 | 00000001 | c0000100 | 08148200 | 20800000 | 0840001c |
| 00040000 | 00000000 | 08000000 | 00000000 | 00400000 | 00020002 |
| 80002000 | 00000500 |          |          |          |          |

&gt;D00401

|          |          |          |          |          |          |
|----------|----------|----------|----------|----------|----------|
| 00040002 | 00000000 | 00000000 | 00000400 | 00000040 | 00000000 |
| 02000000 | 00000000 | 00000100 | 00080000 | 00008008 | 00000000 |
| 00001000 | 00000000 | 00000000 | 000c0004 | 00000000 | 02000000 |
| 00400020 | 00000000 | 80000000 | 10000000 | 21000000 | 00000000 |
| 00000000 | 00000000 | 00000000 | 00000000 | 00000000 | 00470000 |
| 40000000 | 00010008 |          |          |          |          |

&gt;D00398

|          |          |          |          |          |          |
|----------|----------|----------|----------|----------|----------|
| 0000000a | 00c01800 | 00080408 | 80010700 | 00080040 | 0000c100 |
| 0000bc04 | 00000840 | 06402100 | 810000f0 | 0c00800c | 4000b010 |
| 04009000 | 00480000 | 00081080 | 101d900c | 00220020 | 00008000 |
| 10400000 | 00201001 | 80080120 | 1c000a40 | 27800840 | 08300814 |
| 00000400 | c0200002 | 60000200 | 10040060 | 00004208 | 00461000 |
| c0200000 | 80020280 |          |          |          |          |

&gt;D00394

|          |          |          |          |          |          |
|----------|----------|----------|----------|----------|----------|
| 08004002 | 00000000 | 00180100 | 00010600 | 20000020 | 00002040 |
| 01000010 | 00000040 | 00102800 | 08480960 | 08340004 | 40808000 |
| 00000400 | 00000000 | 00020040 | 08000002 | 0004c200 | 02000001 |
| 0800000a | 00000001 | 65100100 | 18100000 | 20000000 | 08500010 |
| 00000800 | 80000000 | 02000008 | 00001080 | 00088000 | 00a60012 |
| 00000080 | 20000700 |          |          |          |          |

&gt;D00391

|          |          |          |          |          |          |
|----------|----------|----------|----------|----------|----------|
| 08000002 | 01400000 | 00100000 | 92010610 | 00180062 | 00004140 |
| 00000c00 | 00000000 | 06000100 | 818000b0 | 0c00000c | 40018000 |
| 00009000 | 0bc80110 | 00a81080 | 001c800c | 00200120 | 82008000 |
| 09c00000 | 40001001 | 84080020 | 10000010 | 25800041 | 08300410 |
| 10040404 | c0000002 | 20000200 | 90040060 | 00004200 | 01460000 |
| 40280004 | 00000280 |          |          |          |          |

&gt;D00387

|          |          |          |          |          |          |
|----------|----------|----------|----------|----------|----------|
| 0080800a | 06840019 | 402c0500 | 98010780 | 41004040 | 00880026 |
| 14840000 | 01201401 | 10000300 | 00290845 | 09010134 | 44068c00 |
| 02100884 | 08088a08 | 80068940 | 080c258c | 0a208800 | 128a0207 |
| 00600408 | 00260000 | 40122400 | 2801a100 | 61001002 | 08508110 |
| 10802010 | e00007c0 | 40084040 | 45021081 | 0000009c | 00860c02 |
| c40c0080 | a4360400 |          |          |          |          |

&gt;D00383

|          |          |          |          |          |          |
|----------|----------|----------|----------|----------|----------|
| 00010000 | 01005200 | 00100102 | 84010700 | 00080080 | 00000010 |
| 00000000 | 20000000 | 00000800 | 000808c0 | 08302000 | 4001b000 |

|          |          |          |          |          |          |
|----------|----------|----------|----------|----------|----------|
| 0600801a | 01a02003 | 80181008 | 000c1008 | 10820000 | 02000000 |
| 02402000 | 00000201 | 00000120 | 38040e10 | 13000001 | 02500018 |
| 00000400 | 80000000 | 00000000 | 10000001 | 08000200 | 0006000b |
| 20024000 | 00402600 |          |          |          |          |

&gt;D00380

|          |          |          |          |          |          |
|----------|----------|----------|----------|----------|----------|
| 00000010 | 00801000 | 01100100 | 02b10e00 | 00000008 | 00000000 |
| 08000000 | 00003000 | 00000000 | 000028c0 | 00202000 | e0008400 |
| 00009000 | 00000041 | 80200000 | 00000000 | 02002000 | 02000000 |
| 00400000 | 00006001 | 80002000 | 18050400 | 00000000 | 08400018 |
| 00000000 | 80000000 | 80000000 | 1000042c | 00000400 | 20060001 |
| 00080000 | 00010260 |          |          |          |          |

&gt;D00377

|          |          |          |          |          |          |
|----------|----------|----------|----------|----------|----------|
| 00000002 | 00000808 | 20000100 | 00010200 | 00000000 | 00024000 |
| 02000000 | 00000800 | 00000100 | 00000840 | 00000004 | 40008000 |
| 00008002 | 00000000 | 00000040 | 10082008 | 00000000 | 02000000 |
| 00000000 | 80020000 | 40000000 | 08020a20 | 20000000 | 00400004 |
| 00040000 | 80000000 | 00040000 | 00000000 | 00400000 | 00060000 |
| c0000000 | 00000000 |          |          |          |          |

&gt;D00371

|          |          |          |          |          |          |
|----------|----------|----------|----------|----------|----------|
| 0000002a | 00801800 | 00080000 | 02010600 | 00080040 | 0000c000 |
| 00008000 | 00000000 | 06400100 | 800000a0 | 0c00800c | 00000000 |
| 00009000 | 00400000 | 00280080 | 000c000c | 00800000 | 00008000 |
| 00400000 | 00000000 | 80000100 | 10000040 | 21800041 | 00300004 |
| 00040000 | c0200000 | 60000000 | 00040000 | 00004000 | 00460000 |
| c0000000 | 00000280 |          |          |          |          |

&gt;D00369

|          |          |          |          |          |          |
|----------|----------|----------|----------|----------|----------|
| 0004c002 | 00000800 | 00002100 | 40010600 | 00000000 | 00000000 |
| 00000000 | 00000000 | 00000800 | 00080840 | 08300004 | 4000b000 |
| 04009002 | 00008000 | 00000040 | 00080008 | 20040000 | 02000100 |
| 08400008 | 00000001 | 40100100 | 18000b00 | 23000040 | 81400010 |
| 00000800 | 88000000 | 00000000 | 00000080 | 04008000 | 00060002 |
| 00000000 | 00020600 |          |          |          |          |

&gt;D00364

|          |          |          |          |          |          |
|----------|----------|----------|----------|----------|----------|
| 0008800a | 0d405000 | 00104300 | 10810610 | 2a061020 | 0008a002 |
| 84082480 | 09001409 | 04400a00 | 001a08c8 | 08308004 | 50818a00 |
| 02008826 | 00200800 | 82020022 | 021e208e | 01020400 | 0a080045 |
| 40340c00 | 00000201 | 40100100 | 18148d50 | 29c0c000 | 08550818 |
| 01042000 | a2000083 | 08442040 | 50a08200 | 02400286 | 00060c03 |
| 84020000 | 20030700 |          |          |          |          |

## &gt;D00362

|          |          |          |          |          |          |
|----------|----------|----------|----------|----------|----------|
| 00010000 | 01005200 | 00100102 | 04010600 | 00080080 | 00000010 |
| 00000000 | 20000000 | 00000800 | 000808c0 | 08302000 | 4001b000 |
| 0600801a | 01202003 | 80180000 | 000c0008 | 10000000 | 02000000 |
| 00402000 | 00000201 | 00000100 | 38040e30 | 03000001 | 02500018 |
| 00000000 | 80000000 | 00000000 | 10000000 | 08000000 | 0006000b |
| 20004000 | 00402600 |          |          |          |          |

## &gt;D00359

|          |          |          |          |          |          |
|----------|----------|----------|----------|----------|----------|
| 00010040 | 81040020 | 00000900 | 80010300 | c0080040 | 00000001 |
| 00000000 | 00000402 | 00004000 | 01100008 | 00000200 | 40009000 |
| 14028028 | 00800004 | 00000404 | 0008100c | 00820000 | 00000020 |
| 03402080 | 0000a001 | 00000020 | 00001a00 | 0100a000 | 00000012 |
| 00200400 | 00000000 | 00406200 | 80000000 | 00000200 | 0000000a |
| 24020000 | 00000000 |          |          |          |          |

## &gt;D00342

|          |          |          |          |          |          |
|----------|----------|----------|----------|----------|----------|
| 00000002 | 01400000 | 00200400 | 82030600 | 00180060 | 00004140 |
| 00000402 | 04000000 | 06000100 | 818000b0 | 0c00000c | 40018000 |
| 00009280 | 03c80110 | 00a81080 | 001c800c | 00200000 | 00008000 |
| 09c00100 | 00001001 | 800a00a0 | 10000010 | 25800041 | 08300010 |
| 10050400 | c0000002 | 20000200 | 10040060 | 00004200 | 01460000 |
| 40280010 | 00000080 |          |          |          |          |

## &gt;D00340

|          |          |          |          |          |          |
|----------|----------|----------|----------|----------|----------|
| 0000c012 | 00802200 | 07000000 | 02b00a20 | 00000010 | 14000000 |
| 08000000 | 00002009 | 40000010 | 00007840 | 00202004 | a200c800 |
| 42008006 | 00000045 | 90220044 | 00008000 | 01a42100 | 00000000 |
| 0a400200 | 00066002 | c0002000 | 08010100 | 20000000 | 08500008 |
| 00106010 | 00080040 | 100000a0 | 000004cc | 00008400 | 60060080 |
| 0000c000 | 00234260 |          |          |          |          |

## &gt;D00333

|          |          |          |          |          |          |
|----------|----------|----------|----------|----------|----------|
| 0000000a | 00c01800 | 00080000 | 80000600 | 00080040 | 0000c100 |
| 0000bc04 | 00000800 | 06400100 | 810000f0 | 0c00800c | 40009000 |
| 00009000 | 00480000 | 00081080 | 101c000c | 00200020 | 00008000 |
| 11400000 | 00201000 | 80080100 | 1c000040 | 25800840 | 08300814 |
| 00000000 | c0200002 | 60000200 | 10040040 | 00004208 | 00461000 |
| c0200000 | 80000280 |          |          |          |          |

## &gt;D00332

|          |          |          |          |          |          |
|----------|----------|----------|----------|----------|----------|
| 00030000 | 01000000 | 00000000 | 00000400 | 00180000 | 00000000 |
| 00000000 | 00000000 | 00000000 | 00000080 | 00000000 | 40011000 |

|          |          |          |          |          |          |
|----------|----------|----------|----------|----------|----------|
| 04008008 | 00800000 | 00000000 | 00080008 | 00000000 | 00000000 |
| 02402000 | 00000001 | 00000000 | 10000a10 | 01000000 | 00000010 |
| 00000000 | 00000000 | 00000000 | 00000000 | 00000000 | 00040000 |
| 00020000 | 00000000 |          |          |          |          |

&gt;D00330

|          |          |          |          |          |          |
|----------|----------|----------|----------|----------|----------|
| 00002000 | 00000000 | 00100100 | 02010200 | 00000040 | 00000010 |
| 00000000 | 00000000 | 00000100 | 00082840 | 08000000 | 50009800 |
| 01008000 | 00001000 | 40040000 | 00080008 | 08020200 | 02000000 |
| 04000000 | 10000000 | 00000000 | 08000a00 | 11000000 | 00400010 |
| 00000004 | 80000000 | 80000000 | 00000041 | 00404000 | 00028002 |
| 00002000 | 00000600 |          |          |          |          |

&gt;D00328

|          |          |          |          |          |          |
|----------|----------|----------|----------|----------|----------|
| 00010000 | 81000020 | 00100000 | 00010100 | 003c1440 | 00200004 |
| 00000880 | 08000402 | 01204000 | 01108020 | 00000000 | 4000d000 |
| 14028028 | 02800004 | 00000400 | 08281008 | 00800000 | 80000020 |
| 1341a000 | 00002001 | 00000020 | 00000280 | 05008000 | 08100014 |
| 00200400 | 00000000 | 00404020 | b4000020 | 00000200 | 03000000 |
| 24a20000 | 00000200 |          |          |          |          |

&gt;D00325

|          |          |          |          |          |          |
|----------|----------|----------|----------|----------|----------|
| 00010002 | 81400020 | 00100100 | 00491300 | 403c1440 | 04200004 |
| 00000880 | 0a000402 | 01200000 | 01100020 | 00100001 | 4000d000 |
| 14028028 | 02800000 | 00000410 | 08281008 | 00820000 | 80000020 |
| 1341a000 | 00022001 | 00000021 | 10000a80 | 05008000 | 08520814 |
| 00200400 | 00000022 | 00404020 | b4000020 | 00000200 | 1300000a |
| 24a20000 | 02000200 |          |          |          |          |

&gt;D00324

|          |          |          |          |          |          |
|----------|----------|----------|----------|----------|----------|
| 00010002 | 81000020 | 00100000 | 00490100 | 403c1440 | 04200004 |
| 00000880 | 0a000402 | 01200000 | 01100020 | 00100001 | 4000d000 |
| 14028028 | 02800000 | 00000410 | 08281008 | 00800000 | 80000020 |
| 1341a000 | 00022001 | 00000021 | 00000280 | 05008000 | 08100814 |
| 00200400 | 00000020 | 00404020 | b4000020 | 00000200 | 03000000 |
| 24a20000 | 00000200 |          |          |          |          |

&gt;D00322

|          |          |          |          |          |          |
|----------|----------|----------|----------|----------|----------|
| 00000004 | 00800208 | c0100100 | 02010600 | 00180400 | 0000c014 |
| 00000000 | 00000000 | 00000100 | 000909c0 | 08000008 | c0008000 |
| 00000000 | 01001000 | 00200080 | 0008000c | 05108200 | 02000280 |
| 18400000 | 00300000 | 80000000 | 18000060 | 23000040 | 8d400010 |
| 00000000 | 80000060 | 00000100 | 01000021 | 04000000 | 0006800a |
| c0000000 | 00000740 |          |          |          |          |

&gt;D00317

|          |          |          |          |          |          |
|----------|----------|----------|----------|----------|----------|
| 0000000a | 00801800 | 00080100 | 00010700 | 00180040 | 0000c000 |
| 0000a000 | 00000800 | 00400100 | 010000c0 | 0000800c | 40019000 |
| 00009000 | 00800000 | 00080080 | 100c100c | 00020000 | 00000000 |
| 09400000 | 00200001 | 80000020 | 1c000a50 | 21800840 | 00400014 |
| 00000400 | 00000000 | 00000200 | 00000000 | 00000208 | 0046100a |
| c0080000 | 00000080 |          |          |          |          |

&gt;D00315

|          |          |          |          |          |          |
|----------|----------|----------|----------|----------|----------|
| 0001004a | 03004808 | 02000500 | 50210310 | 800c5071 | 02204002 |
| 11003000 | 00000041 | 00400b00 | 01082850 | 08108004 | 50819800 |
| 14008880 | 00618000 | 000e0040 | 020c000c | 18008000 | 06800004 |
| 0568041a | 40400001 | 44010120 | 08008a68 | a18050c2 | 80400110 |
| 0004ac00 | 80002201 | 08080040 | 00000000 | 00000205 | 00820c02 |
| 40040200 | 20000420 |          |          |          |          |

&gt;D00805

|          |          |          |          |          |          |
|----------|----------|----------|----------|----------|----------|
| 04080001 | 00000a80 | 00000400 | 00000000 | 00000004 | 08000000 |
| 00004000 | 00000000 | 00000000 | 00000000 | 00000000 | 40000000 |
| 00000000 | 01020000 | 00000000 | 00080008 | 00000028 | 00000000 |
| 20000002 | 00000000 | 00000000 | 05500100 | 00000000 | 00000000 |
| 00000040 | 08000000 | 02000000 | 00014000 | 00000000 | 00000000 |
| 00000000 | 00028005 |          |          |          |          |

&gt;D00786

|          |          |          |          |          |          |
|----------|----------|----------|----------|----------|----------|
| 08000002 | c2000818 | 20001101 | 40010200 | 00000000 | 00000000 |
| 02002000 | 01000000 | 14400100 | 00080860 | 0c000004 | 40008800 |
| 00018202 | 00000000 | 20100140 | 3000c018 | 00000000 | 02000000 |
| 00000000 | 00020600 | 40020000 | 08020200 | 20000000 | 00421414 |
| 00040000 | e0000000 | 00120000 | 4000a000 | 80400080 | 00060002 |
| 80000000 | 24000400 |          |          |          |          |

&gt;D00785

|          |          |          |          |          |          |
|----------|----------|----------|----------|----------|----------|
| 00000000 | 00000000 | 00100100 | 00010600 | 00402000 | 00000000 |
| 00000000 | 00100000 | 00000880 | 00080840 | 08300000 | 40008000 |
| 00000002 | 00000000 | 00100000 | 00000000 | 00000000 | 02000000 |
| 00000000 | 00000201 | 00000100 | 18200000 | 00010000 | 81400010 |
| 00000000 | 80000000 | 00000000 | 00000000 | 04000000 | 00060002 |
| 00000020 | 00020600 |          |          |          |          |

&gt;D00781

|          |          |          |          |          |          |
|----------|----------|----------|----------|----------|----------|
| 00000006 | c0008018 | 20100100 | 00010620 | 00000004 | 00080000 |
| 82102080 | 00000400 | 15800000 | 00400860 | 04200004 | 40129000 |



|          |          |          |          |          |          |
|----------|----------|----------|----------|----------|----------|
| 00018202 | 00010000 | 20100142 | 0000c018 | 20400400 | 02000100 |
| 00018000 | 00820602 | 40020000 | 18000600 | 60000401 | 00401418 |
| 00040000 | c0000000 | 004a2100 | 4001a000 | 00480000 | 000e0101 |
| 04000000 | 0c008280 |          |          |          |          |

&gt;D00771

|          |          |          |          |          |          |
|----------|----------|----------|----------|----------|----------|
| 00018002 | 00000010 | 00080000 | 00000200 | 00240200 | 00000000 |
| 00000404 | 00000200 | 00084420 | 00000850 | 00000005 | 0000a800 |
| 42000414 | 01600000 | 20000140 | 0604000c | 00000000 | 40000020 |
| 00200080 | 40000000 | 40020000 | 08000100 | 20810000 | 04980000 |
| 00006000 | 00000000 | 00000010 | 18000000 | 00002000 | 01060000 |
| 00140000 | 04420000 |          |          |          |          |

&gt;D00762

|          |          |          |          |          |          |
|----------|----------|----------|----------|----------|----------|
| 00000000 | 00000008 | 20000100 | 00010600 | 00000000 | 00000000 |
| 02000000 | 00000000 | 00000800 | 00080840 | 08100000 | 4000b000 |
| 04008002 | 00000000 | 00000000 | 00080008 | 00000000 | 02000000 |
| 00400008 | 00020001 | 00000100 | 18000a00 | 03000040 | 81400010 |
| 00000800 | 80000000 | 00120000 | 00000000 | 04000000 | 00060002 |
| 00000000 | 00000400 |          |          |          |          |

&gt;D00753

|          |          |          |          |          |          |
|----------|----------|----------|----------|----------|----------|
| 00010440 | 81045000 | 02900900 | 80010700 | c00c00c0 | 00200001 |
| 00000840 | 28000402 | 04000040 | 011080a8 | 40202200 | 5001f000 |
| 1602800a | 028a0002 | 8008140c | 0828100c | 10a20000 | 80000000 |
| 03c02090 | 0200a201 | 00000020 | 10040e10 | 1740a080 | 0810001e |
| 10201401 | 00000400 | 00c0c000 | b0000001 | 00000240 | 80040003 |
| 24a24000 | 00002210 |          |          |          |          |

&gt;D00752

|          |          |          |          |          |          |
|----------|----------|----------|----------|----------|----------|
| 04010001 | c9000808 | 20000309 | 80050702 | 00081091 | 0882c000 |
| 42140001 | 00000e02 | 00040100 | 00980a48 | 28200000 | 40009800 |
| 0402c022 | 00210000 | 0128100d | 0a083108 | 10860800 | 02100200 |
| 00680000 | 42022a01 | 00000020 | 28020b20 | 13008000 | 00400014 |
| 10200400 | c0002000 | 004a0000 | 80000001 | 00000301 | 80060002 |
| c4000004 | 00000600 |          |          |          |          |

&gt;D00733

|          |          |          |          |          |          |
|----------|----------|----------|----------|----------|----------|
| 04000002 | 44003818 | 20004108 | 04010700 | 80041000 | 02008100 |
| 06000000 | 0200100c | 00010200 | 00010840 | 00240004 | 40008000 |
| 80808802 | 00402080 | 31004541 | 201c200c | 10000008 | 02000000 |
| 00680000 | 00020001 | 40020040 | 28028608 | 21800000 | 8244801c |
| 00004000 | c0000000 | 00000000 | 80000000 | 09000300 | 00060001 |
| 80048000 | 04000220 |          |          |          |          |

&gt;D00726

|          |          |          |          |          |          |
|----------|----------|----------|----------|----------|----------|
| 00008002 | 88002808 | 20000108 | 84010600 | 00001000 | 00020100 |
| 06000000 | 02001408 | 00000000 | 00110848 | 08200004 | 40008800 |
| 02008806 | 08002000 | 81000441 | 00002008 | 00000000 | 02000400 |
| 00000000 | 00020400 | 40000000 | 28028700 | 20000000 | 0240000c |
| 00002000 | c0000400 | 00100800 | 80000000 | 08000300 | 00060801 |
| 84040000 | 00020200 |          |          |          |          |

&gt;D00709

|          |          |          |          |          |          |
|----------|----------|----------|----------|----------|----------|
| 00020000 | 00003000 | 00100000 | 00000400 | 00000000 | 00000010 |
| 00000000 | 20000000 | 00000000 | 00000080 | 00200000 | 40003000 |
| 06008002 | 00000000 | 80000000 | 00000000 | 00000000 | 00000000 |
| 00000000 | 00000201 | 00000000 | 30000600 | 00000001 | 02000018 |
| 00000000 | 00000000 | 00000000 | 10000000 | 08000000 | 00040001 |
| 20004000 | 00802200 |          |          |          |          |

&gt;D00703

|          |          |          |          |          |          |
|----------|----------|----------|----------|----------|----------|
| 00000000 | 01400000 | 00000100 | 00010300 | 00482000 | 00000000 |
| 00000001 | 80000000 | 00000000 | 00000000 | 00000080 | 40008000 |
| 00008000 | 00800100 | 00000000 | 00190008 | 00820000 | 00000000 |
| 02402000 | 00000001 | 00000008 | 00000c00 | 01000000 | 00000010 |
| 00000000 | 00000102 | 00000000 | 00000008 | 00000200 | 00040202 |
| 00020800 | 00000000 |          |          |          |          |

&gt;D00691

|          |          |          |          |          |          |
|----------|----------|----------|----------|----------|----------|
| 0000002a | 00801800 | 80080000 | 02010700 | 00080060 | 0000c140 |
| 00008000 | 00000000 | 06400100 | 808000a0 | 0c00800c | 40010000 |
| 00009000 | 00c00000 | 00280080 | 000c800c | 00800000 | 00088000 |
| 00c00000 | 00000000 | 80000100 | 10000040 | 27800041 | 04300014 |
| 00040000 | c0200000 | 60000000 | 00040030 | 00004000 | 00460000 |
| c0080000 | 00000280 |          |          |          |          |

&gt;D00670

|          |          |          |          |          |          |
|----------|----------|----------|----------|----------|----------|
| 00010000 | 43000808 | 2010010b | 00010600 | 00001000 | 40008000 |
| 02040000 | 22001000 | 00000800 | 000808c0 | 08300000 | 50019000 |
| 0400c80a | 20201000 | 01004421 | 20028008 | 00000000 | 02000000 |
| 00082008 | 00020201 | 00400100 | 98028250 | 00004000 | 00500014 |
| 00000800 | c0000001 | 00120000 | 90000000 | 00000302 | 0106000a |
| a0060000 | 00020600 |          |          |          |          |

&gt;D00667

|          |          |          |          |          |          |
|----------|----------|----------|----------|----------|----------|
| 00000002 | 81001008 | 60100008 | 00000600 | 00001000 | 08008000 |
| 02000000 | 00000000 | 04000200 | 000008c0 | 00200004 | 40018000 |

|          |          |          |          |          |          |
|----------|----------|----------|----------|----------|----------|
| 00008402 | 08000000 | 01010041 | 00120008 | 00060000 | 00080000 |
| 08002000 | 00022601 | 40000000 | 18040c50 | 30000000 | 00102018 |
| 00000000 | 00010022 | 00000000 | 10000080 | 00008200 | 00060001 |
| 80020008 | 10020200 |          |          |          |          |

&gt;D00658

|          |          |          |          |          |          |
|----------|----------|----------|----------|----------|----------|
| 0004c012 | 00802202 | 07002000 | 03b00e20 | 00080012 | 14000000 |
| 08000000 | 00002009 | 40080030 | 00007840 | 00202004 | e200c800 |
| 42009006 | 00000045 | 90220044 | 00008000 | 01a42100 | 00040100 |
| 0a400200 | 00066002 | c0102000 | 08010100 | 20000000 | 08500008 |
| 02106058 | 08080044 | 100000a0 | 000004cc | 00008400 | 62060080 |
| 0000e000 | 00234260 |          |          |          |          |

&gt;D00656

|          |          |          |          |          |          |
|----------|----------|----------|----------|----------|----------|
| 0004c016 | 00802202 | 07002000 | 03b00e20 | 00080012 | 14000000 |
| 08000000 | 00002009 | 40080030 | 00007840 | 00202004 | e200c800 |
| 42009006 | 00000045 | 90220044 | 00008000 | 01a42100 | 00040100 |
| 0a400200 | 00066002 | c0102100 | 08010100 | 20020000 | 08500008 |
| 02106018 | 08080044 | 100000a0 | 000004cc | 00008400 | 62060080 |
| 0000e000 | 00234260 |          |          |          |          |

&gt;D00655

|          |          |          |          |          |          |
|----------|----------|----------|----------|----------|----------|
| 00070004 | 40000008 | 22001265 | 00780600 | 00001000 | 00100001 |
| 00021000 | 00000014 | 00000000 | 00008002 | 00002000 | 60000080 |
| 8440944c | 00040005 | 80006800 | 00082a0c | 00020c00 | 00000201 |
| 00820020 | 00a04000 | 00000000 | a0201690 | 22100240 | 00804010 |
| 00000000 | 2800c000 | 40001002 | 0021004c | 10001000 | 00050008 |
| 000c0000 | 01010068 |          |          |          |          |

&gt;D00654

|          |          |          |          |          |          |
|----------|----------|----------|----------|----------|----------|
| 00004012 | 00803000 | 07100100 | 02b10a20 | 00000018 | 04000000 |
| 08000400 | 00012009 | 40000010 | 00003850 | 0020200c | e200c004 |
| 40008000 | 09000045 | 90320044 | 00008000 | 01a42180 | 02000000 |
| 0a400200 | 00066012 | c0002000 | 08210000 | 20000000 | 08500008 |
| 00146010 | 80000040 | 000000a0 | 900004ec | 00408400 | 60060080 |
| 0010c000 | 00214260 |          |          |          |          |

&gt;D00653

|          |          |          |          |          |          |
|----------|----------|----------|----------|----------|----------|
| 10010010 | 05401200 | 01106b06 | 81b80640 | 00140103 | 00210020 |
| 18420000 | 24001000 | 05880840 | 000ac0c0 | 00702201 | e41ac0e0 |
| 1b21021e | 04261301 | 82001400 | 10004100 | 0c000081 | 02022000 |
| 00010030 | 0000e201 | 60000000 | 58849083 | 00800360 | 1a040219 |
| 0c02f000 | 74002000 | 00000800 | 9401000d | 00600100 | 20070032 |
| 10008000 | 01c34a61 |          |          |          |          |

&gt;D00652

|          |          |          |          |          |          |
|----------|----------|----------|----------|----------|----------|
| 000100d0 | 20440000 | 01106b04 | 87b90600 | 001c1102 | 00610008 |
| 34030001 | 04041008 | 018810c0 | 00c8a800 | 00602201 | e01cc0c0 |
| 1a00021f | 08022201 | 81101400 | 20288108 | 08202081 | 02402000 |
| 00e10060 | 0000f605 | 00000000 | 78a09080 | 01180181 | 3b000238 |
| 4200e001 | 64002004 | 00000800 | 8001000c | 0c000700 | 24064042 |
| 00010002 | 00c16b61 |          |          |          |          |

&gt;D00651

|          |          |          |          |          |          |
|----------|----------|----------|----------|----------|----------|
| 0200c016 | 40822208 | 21002508 | 01b10620 | 00088013 | 14010200 |
| 18001010 | 00002c01 | 40800010 | 8008c843 | 80006004 | 62008840 |
| 4242100e | 40040009 | 802200c0 | 20018008 | 25002d08 | 02040100 |
| 03500400 | 01047000 | c0002000 | 39010100 | 20000204 | 08524408 |
| 060c6000 | 88080044 | 518804a0 | 08000c7c | 00080400 | 62860000 |
| 04004102 | 06030160 |          |          |          |          |

&gt;D00650

|          |          |          |          |          |          |
|----------|----------|----------|----------|----------|----------|
| 00004052 | 20803002 | 47100100 | 03b10e20 | 20080018 | 04000000 |
| 08010400 | 00012009 | 40000010 | 00483850 | 0820200c | e200c004 |
| 40008001 | 09000045 | 90320044 | 00008000 | 01a42180 | 02000000 |
| 0a400200 | 00066412 | c0102000 | 18210000 | 20000000 | 99500019 |
| 02146018 | 80000144 | 000000a0 | 900004ec | 04408400 | 62060082 |
| 0010e000 | 00214660 |          |          |          |          |

&gt;D00630

|          |          |          |          |          |          |
|----------|----------|----------|----------|----------|----------|
| 00000040 | 01010040 | 00000000 | 00010000 | 00280060 | 00000000 |
| 00000008 | 00000440 | 1000a000 | 03000000 | 00000002 | 42808000 |
| 80018800 | 02800000 | 00080000 | 140a8018 | 00000000 | 00000000 |
| 21402000 | 00000001 | 00000020 | 10000000 | 05000050 | 1d000010 |
| 00000400 | 00000000 | 00000000 | 00000220 | 24004200 | 00000000 |
| 00000000 | 10000000 |          |          |          |          |

&gt;D00625

|          |          |          |          |          |          |
|----------|----------|----------|----------|----------|----------|
| 00000000 | 01000000 | 00100000 | 00000400 | 00380080 | 00000000 |
| 00000000 | 20000000 | 00000000 | 00000080 | 00200000 | 50010000 |
| 00000002 | 02800000 | 00280000 | 00080008 | 10000000 | 00000000 |
| 01c02000 | 00000201 | 00000000 | 10000010 | 07000080 | 00100010 |
| 00000001 | 00000000 | 00000000 | 10000000 | 00000000 | 00040000 |
| 00000000 | 00000a00 |          |          |          |          |

&gt;D00624

|          |          |          |          |          |          |
|----------|----------|----------|----------|----------|----------|
| 00010000 | 01005000 | 00100000 | 84010700 | 00080080 | 00000010 |
| 00000000 | 20000000 | 00000000 | 00000080 | 00202000 | 4001b000 |

|          |          |          |          |          |          |
|----------|----------|----------|----------|----------|----------|
| 0600801a | 01802003 | 80181008 | 00081008 | 10820000 | 00000000 |
| 02402000 | 00000201 | 00000020 | 30040e10 | 13000001 | 02100018 |
| 00000400 | 00000000 | 00000000 | 10000001 | 08000200 | 00040001 |
| 20024000 | 00002200 |          |          |          |          |

&gt;D00623

|          |          |          |          |          |          |
|----------|----------|----------|----------|----------|----------|
| 00018008 | 47805208 | 2210010a | 94010700 | 200810a0 | c0000000 |
| 03041000 | 22001004 | 00400880 | 000908d0 | 08302000 | 5001b000 |
| 0600c8c2 | 20202003 | 81181489 | 000c9008 | 10820200 | 02000020 |
| 00480008 | 00020201 | 80020120 | 38208e00 | 33004041 | 83448018 |
| 00000c00 | c0000001 | 08324000 | 90000001 | 0c000300 | 0086000b |
| 20044000 | 00422600 |          |          |          |          |

&gt;D00622

|          |          |          |          |          |          |
|----------|----------|----------|----------|----------|----------|
| 00010440 | 03005208 | 0010050a | 00050e20 | 00080081 | 00000010 |
| 00004900 | 30000000 | 0000c800 | 000808e0 | 09300001 | 4011b000 |
| 0600801a | 01a200b0 | 82095000 | 20281608 | 100a0028 | 02100003 |
| c2406010 | 00000201 | 01004120 | 19562e10 | 03c00000 | 80508218 |
| 00002402 | 80000100 | 22000400 | 38214000 | 008c0200 | 01060303 |
| 30864000 | 0000ce21 |          |          |          |          |

&gt;D00621

|          |          |          |          |          |          |
|----------|----------|----------|----------|----------|----------|
| 00010000 | 01005200 | 00100102 | 84010700 | 00080080 | 00000010 |
| 00000000 | 20000400 | 01000800 | 000808c0 | 08302000 | 4001b000 |
| 06008012 | 01202003 | 80181008 | 000c1008 | 10820000 | 02000000 |
| 00610010 | 00000201 | 00000120 | 38040e00 | 13000001 | 02500018 |
| 00001400 | 80001000 | 00400000 | 10000001 | 08000200 | 0006000b |
| 24004000 | 00402600 |          |          |          |          |

&gt;D00620

|          |          |          |          |          |          |
|----------|----------|----------|----------|----------|----------|
| 00014002 | 01004200 | 40101122 | 84010708 | 20080180 | 00002040 |
| 03000000 | 20100100 | 00100800 | 08080ac0 | 08382024 | 4001b000 |
| 06008002 | 00302803 | 801a1048 | 080c100a | 10a68000 | 02000000 |
| 08400008 | 80000201 | 44100120 | 38000e10 | 33002001 | 02d0001a |
| 00000400 | 80000080 | 48000010 | 10001081 | 08088200 | 0006000b |
| 20005080 | 20422600 |          |          |          |          |

&gt;D00596

|          |          |          |          |          |          |
|----------|----------|----------|----------|----------|----------|
| 04006002 | 00001328 | 20107308 | 00110606 | 00051080 | 00000800 |
| 02040000 | 00000400 | 01400800 | 230948c1 | 08340005 | 40009300 |
| 0481b802 | 000c0000 | 01001001 | 000c000c | 04040410 | 02004200 |
| 08210018 | 00a20101 | 40120108 | 1c048e04 | 32800900 | 02600018 |
| 00001800 | 80001020 | 08520080 | 140000c0 | 00008208 | 0006081b |
| 04005010 | 83010600 |          |          |          |          |

&gt;D00593

|          |          |          |          |          |          |
|----------|----------|----------|----------|----------|----------|
| 00000010 | 01809000 | 01100110 | 02b10e00 | 00000048 | 08020010 |
| 08000024 | 20003404 | 01000000 | 011828c0 | 08202000 | e0019400 |
| 04009302 | 00010041 | 80200000 | 00000000 | 22002008 | 02000500 |
| 02412040 | 00006201 | 80022100 | 18250710 | 00008000 | 89500018 |
| 00010000 | 88000000 | 80400000 | 1000052c | 04000400 | 20060003 |
| 0c0a0004 | 00012660 |          |          |          |          |

&gt;D00584

|          |          |          |          |          |          |
|----------|----------|----------|----------|----------|----------|
| 00000002 | 00000000 | 00100000 | 06000600 | 00000000 | 00004000 |
| 00000000 | 00000000 | 06000100 | 00000020 | 04000004 | 00000000 |
| 00008000 | 00c01000 | 00220000 | 000c0004 | 00000000 | 1000c000 |
| 00400000 | 00000000 | 00000000 | 00000000 | 20800040 | 00100000 |
| 00040000 | c0000000 | 20000000 | 00040800 | 00004000 | 00420000 |
| 40000000 | 00000280 |          |          |          |          |

&gt;D00579

|          |          |          |          |          |          |
|----------|----------|----------|----------|----------|----------|
| 00000000 | 00000800 | 00000000 | 00000000 | 00000000 | 00000000 |
| 00000000 | 00000000 | 00000000 | 00000000 | 00000000 | 00000000 |
| 00008000 | 00020000 | 00000000 | 00000008 | 00000028 | 00080004 |
| 00000000 | 00000000 | 00000000 | 05400800 | 00000000 | 00000000 |
| 00000000 | 00000000 | 00000000 | 00014000 | 00000000 | 00000000 |
| 04000000 | 00008804 |          |          |          |          |

&gt;D00577

|          |          |          |          |          |          |
|----------|----------|----------|----------|----------|----------|
| 00000000 | 00000008 | 20000300 | 00010200 | 00000000 | 00000000 |
| 82000080 | 00000402 | 00000800 | 00180840 | 08100100 | 40008000 |
| 00000002 | 00000000 | 00000002 | 00000008 | 00000400 | 02000000 |
| 00000000 | 00020001 | 00000100 | 18000000 | 00008001 | 00400010 |
| 01000000 | 80000000 | 00522000 | 40000000 | 00400000 | 00020002 |
| 04000000 | 00000400 |          |          |          |          |

&gt;D00574

|          |          |          |          |          |          |
|----------|----------|----------|----------|----------|----------|
| 00010002 | 01001800 | 00100102 | 40010600 | 00000000 | 00000000 |
| 00000000 | 20000004 | 00100880 | 000a08c0 | 08300004 | 50019000 |
| 0500801a | 00200000 | 40000040 | 00000000 | 00000000 | 02000000 |
| 00002000 | 00000201 | 40020100 | 18240610 | 20000000 | 81500018 |
| 00000000 | 80000000 | 00000000 | 10000000 | 04000000 | 00060003 |
| 00002000 | 00402600 |          |          |          |          |

&gt;D00569

|          |          |          |          |          |          |
|----------|----------|----------|----------|----------|----------|
| 04004002 | 00000008 | 20000008 | 00000600 | 00001000 | 00000000 |
| 02000000 | 00000008 | 00000000 | 00000840 | 00280004 | 40008000 |

|          |          |          |          |          |          |
|----------|----------|----------|----------|----------|----------|
| 00808022 | 00100000 | 01000041 | 00080008 | 00040000 | 00000000 |
| 08000000 | 00020000 | 40100000 | 08000600 | 20002000 | 00000000 |
| 00000000 | 00000000 | 00040000 | 00000080 | 00008200 | 00060001 |
| 00000000 | 00000200 |          |          |          |          |

&gt;D00568

|          |          |          |          |          |          |
|----------|----------|----------|----------|----------|----------|
| 00000040 | 00801200 | 00020100 | 00910200 | 00100040 | 00000000 |
| 80000080 | 00000440 | 01800000 | 00080840 | 48002100 | 60009000 |
| 05008000 | 00010001 | c02c0002 | 00080008 | 0c020410 | 02000000 |
| 4441c018 | 00002000 | 80010020 | 19040a00 | 01800000 | 08400019 |
| 00001400 | 80000000 | 00402000 | 40000420 | 00400200 | 00020002 |
| 04002000 | 00810430 |          |          |          |          |

&gt;D00567

|          |          |          |          |          |          |
|----------|----------|----------|----------|----------|----------|
| 00006036 | 00802208 | a1100100 | 00b10600 | 01080010 | 00004002 |
| 00440400 | 00001400 | 00000104 | 000108f0 | 0900a004 | 6000800a |
| 00000810 | 02000201 | 80200040 | 000c200c | 00020000 | 02801000 |
| 04400000 | 10222008 | c0100000 | 1801a020 | 30800800 | 8b404008 |
| 00000000 | c0000040 | 30c20000 | 90000869 | 04004104 | 20460008 |
| 40260200 | 800126a2 |          |          |          |          |

&gt;D00566

|          |          |          |          |          |          |
|----------|----------|----------|----------|----------|----------|
| 00000000 | 00000808 | 20000100 | 00010200 | 00000000 | 00024000 |
| 02000000 | 00000800 | 00000100 | 00000840 | 00000000 | 40008000 |
| 00008002 | 00000000 | 00000000 | 00082008 | 00000000 | 02000000 |
| 00000000 | 00020000 | 00000000 | 08020a20 | 00000000 | 00400004 |
| 00000000 | 80000000 | 00000000 | 00000000 | 00000000 | 00020000 |
| c0000000 | 00000800 |          |          |          |          |

&gt;D00563

|          |          |          |          |          |          |
|----------|----------|----------|----------|----------|----------|
| 0800400a | 00004002 | 40104120 | 14010618 | 00041020 | 04082040 |
| 11002401 | 23001041 | 00500180 | 38090a40 | 08200004 | 4080c000 |
| 01000ca2 | 00202000 | 00020400 | 021c0086 | 04259200 | 02004005 |
| 08300400 | 00a00200 | 45120008 | 3e208400 | 21814821 | 83740012 |
| 00040080 | e0000080 | 08004088 | c0001080 | 0e488198 | 00860803 |
| 200610a0 | 20010600 |          |          |          |          |

&gt;D00562

|          |          |          |          |          |          |
|----------|----------|----------|----------|----------|----------|
| 00000002 | 00000800 | 00000100 | 40040600 | 04000400 | 00014000 |
| 02000000 | 00000c00 | 06800900 | 00080020 | 00108004 | 60000800 |
| 08008000 | 00500000 | 00020000 | 000c0004 | 00000000 | 07008000 |
| 00400028 | 00010001 | 00000400 | 00000000 | 20800044 | 00100110 |
| 00002000 | 80000200 | 20000020 | 00040000 | 00004004 | 02430002 |
| 40000000 | 200100a8 |          |          |          |          |

&gt;D00560

|          |          |          |          |          |          |
|----------|----------|----------|----------|----------|----------|
| 00000002 | 01000400 | 00100102 | 02010600 | 000c0040 | 00004090 |
| 00000000 | 21000000 | 04300900 | 800809e0 | 0d30800c | 50018000 |
| 00009002 | 01e41000 | 003000c0 | 000c0004 | 00100000 | 02000080 |
| 00600000 | 00100201 | c0000100 | 18000030 | 21800001 | 00700010 |
| 00000000 | e0000000 | 00000000 | 50000001 | 00000080 | 00468012 |
| 40080000 | 00002680 |          |          |          |          |

&gt;D00550

|          |          |          |          |          |          |
|----------|----------|----------|----------|----------|----------|
| 0080804a | 06840011 | 403c0500 | 9a010790 | 40000060 | 00080032 |
| 1404d000 | 01201001 | 10000300 | 00091855 | 4903801c | 40868c00 |
| 021018a4 | 08189a08 | 80868940 | 080c0184 | 0b200a08 | 020a0203 |
| 80e00408 | 40020000 | c0122001 | 38018100 | 610010c2 | 99508910 |
| 10842000 | e00005c0 | 4008c000 | 45001001 | 0400089c | 00ce8c02 |
| 400c0084 | a4320600 |          |          |          |          |

&gt;D00549

|          |          |          |          |          |          |
|----------|----------|----------|----------|----------|----------|
| 00000000 | 00000008 | 20000100 | 00010200 | 00000001 | 00000000 |
| 02000000 | 00000200 | 00000000 | 00080840 | 08000000 | 40008000 |
| 00000002 | 00000000 | 00000000 | 00082008 | 00000000 | 02000000 |
| 00000000 | 00020000 | 00000000 | 08000000 | 00000000 | 00400010 |
| 00000000 | 80000000 | 00000000 | 00800000 | 00000000 | 00020002 |
| 00000000 | 00000400 |          |          |          |          |

&gt;D00547

|          |          |          |          |          |          |
|----------|----------|----------|----------|----------|----------|
| 00000000 | 00000000 | 00100000 | 00000000 | 00000000 | 00000000 |
| 00000000 | 00000000 | 00000000 | 00000000 | 00000000 | 40008000 |
| 00000000 | 00000000 | 00000000 | 00080008 | 00000000 | 00000000 |
| 00100000 | 00000000 | 00000000 | 00000000 | 00000000 | 00500010 |
| 00000000 | 00000000 | 00000100 | d0000000 | 02000200 | 00000000 |
| 00000000 | 00100600 |          |          |          |          |

&gt;D00546

|          |          |          |          |          |          |
|----------|----------|----------|----------|----------|----------|
| 00000000 | 00000000 | 00100000 | 00000000 | 00000000 | 00000000 |
| 00000000 | 00000000 | 00000000 | 00000000 | 00000000 | 40008000 |
| 00000000 | 00000000 | 00000000 | 00080008 | 00000000 | 00000000 |
| 00900000 | 00000000 | 00000000 | 00000000 | 00000000 | 00c00000 |
| 00000000 | 00000000 | 00000000 | d0000000 | 02000200 | 00000000 |
| 00000000 | 00100600 |          |          |          |          |

&gt;D00545

|          |          |          |          |          |          |
|----------|----------|----------|----------|----------|----------|
| 00100000 | 00000000 | 00100000 | 00000000 | 00000000 | 00400000 |
| 00000000 | 00000000 | 00000000 | 00000000 | 00000000 | 40008000 |



|          |          |          |          |          |          |
|----------|----------|----------|----------|----------|----------|
| 00000000 | 00000000 | 00000000 | 00080008 | 00000000 | 00000000 |
| 00100000 | 00000000 | 00000000 | 00000100 | 00000200 | 00400000 |
| 00000000 | 28000000 | 00000000 | d0000000 | 02000200 | 00000000 |
| 00000000 | 00120600 |          |          |          |          |

&gt;D00544

|          |          |          |          |          |          |
|----------|----------|----------|----------|----------|----------|
| 00180000 | 00000000 | 00100000 | 00000000 | 02000000 | 00000000 |
| 00000000 | 00000000 | 00000000 | 00000000 | 00000000 | 40008000 |
| 00000000 | 00000000 | 00000000 | 00080008 | 00000000 | 00000000 |
| 00000000 | 00000000 | 00000000 | 00000100 | 00000000 | 00000000 |
| 00000040 | 08000000 | 00000000 | d0000000 | 02000200 | 00000000 |
| 00000000 | 00020200 |          |          |          |          |

&gt;D00543

|          |          |          |          |          |          |
|----------|----------|----------|----------|----------|----------|
| 00180000 | 00000000 | 00100000 | 00000000 | 02000000 | 00000000 |
| 00000000 | 00000000 | 00000000 | 00000000 | 00000000 | 40008000 |
| 00000000 | 00000000 | 00000000 | 00080008 | 00000000 | 00000000 |
| 00900000 | 00000000 | 00000000 | 00000100 | 00000000 | 00c00000 |
| 00000000 | 48000000 | 00000000 | d0000200 | 02000200 | 00000000 |
| 00000000 | 00120600 |          |          |          |          |

&gt;D00542

|          |          |          |          |          |          |
|----------|----------|----------|----------|----------|----------|
| 00100000 | 00008000 | 00100000 | 00000000 | 00000000 | 00000000 |
| 00000000 | 00000000 | 00000000 | 00000000 | 00000000 | 40000000 |
| 00080100 | 00000000 | 00000000 | 00000000 | 00000000 | 00000000 |
| 00000000 | 00000000 | 00001000 | 00000100 | 00000000 | 00000000 |
| 00000000 | 08000000 | 00000000 | 90000000 | 00000000 | 00000000 |
| 00000008 | 00020200 |          |          |          |          |

&gt;D00538

|          |          |          |          |          |          |
|----------|----------|----------|----------|----------|----------|
| 00004080 | 04000020 | 001a2100 | 22310200 | 00040200 | 00100010 |
| 00000004 | 20008000 | 04020000 | 0002484c | 00002400 | 40008000 |
| 00005020 | 00441041 | 80000000 | 0004000c | 01000208 | 02020300 |
| 00200000 | 00000000 | 00802008 | 08010208 | 00c00000 | 00490080 |
| 00200000 | 80010000 | 00000030 | 08000109 | 0000000c | 05028200 |
| 00000000 | c0010030 |          |          |          |          |

&gt;D00537

|          |          |          |          |          |          |
|----------|----------|----------|----------|----------|----------|
| 00000000 | 01020000 | 00000000 | 00e10100 | 80280140 | 00000004 |
| 80002800 | 08000440 | 00202000 | 010000a0 | 00002000 | 40018000 |
| 00004000 | 02800003 | 00000002 | 002a9008 | 00800000 | 0000a000 |
| 11c0a000 | 00000001 | 10100020 | 10000010 | 050000a0 | 08100010 |
| 05000405 | 00000001 | 40000000 | 24000420 | 00028201 | 00000000 |
| 00a00008 | 00010060 |          |          |          |          |

&gt;D00536

|          |          |          |          |          |          |
|----------|----------|----------|----------|----------|----------|
| 00000000 | 00400000 | 00000100 | 00010200 | 000000c0 | 00000000 |
| 00000000 | 00000040 | 00000000 | 01080840 | 08000000 | 40008000 |
| 00008000 | 00000100 | 00040000 | 00180008 | 08020000 | 02000000 |
| 05000000 | 00000000 | 00000000 | 18000c00 | 01000000 | 00400010 |
| 00000000 | 80040002 | 00000000 | 00000000 | 00000200 | 0006000a |
| 00000000 | 00000400 |          |          |          |          |

&gt;D00535

|          |          |          |          |          |          |
|----------|----------|----------|----------|----------|----------|
| 00030000 | 01000000 | 00000000 | 00000400 | 00180000 | 00000000 |
| 00000000 | 00000400 | 00000000 | 00108088 | 00000000 | 40001000 |
| 04008000 | 00000000 | 00000400 | 00080008 | 00000000 | 00000100 |
| 00400000 | 00000001 | 00000000 | 10000a00 | 01000000 | 00000010 |
| 00000000 | 00000000 | 00000000 | 80000000 | 00000000 | 00040000 |
| 04000000 | 00000000 |          |          |          |          |

&gt;D00533

|          |          |          |          |          |          |
|----------|----------|----------|----------|----------|----------|
| 08000002 | 00000800 | 00080100 | 00010a00 | 00000020 | 00012002 |
| 01000010 | 00082041 | 00902800 | 08480840 | 083c0024 | 40809000 |
| 01008400 | 00100000 | 40020040 | 08000002 | 0004c200 | 02000001 |
| 0800800a | 00000041 | 45000500 | 08120600 | 20002000 | 08500014 |
| 00100800 | 80000200 | 02000018 | 00001080 | 00088000 | 00a60003 |
| 80002080 | 20004501 |          |          |          |          |

&gt;D00530

|          |          |          |          |          |          |
|----------|----------|----------|----------|----------|----------|
| 0000e002 | 40000808 | e0000180 | 18050e10 | 05005020 | 00004006 |
| 00401000 | 00280800 | 00000100 | 10010850 | 00290004 | 60018810 |
| 83808806 | 08100000 | 00020840 | 000c200c | 00668000 | 02802000 |
| 0cc00000 | 00620000 | 41100000 | 0c028600 | 30802c41 | 82404108 |
| 00142400 | 80080000 | 18200200 | 000008f0 | 0040c004 | 00460401 |
| 40000a00 | 000042a0 |          |          |          |          |

&gt;D00528

|          |          |          |          |          |          |
|----------|----------|----------|----------|----------|----------|
| 0000002a | 00801800 | 00080000 | 02010700 | 00080040 | 0000c000 |
| 00008000 | 00000000 | 06400100 | 800000a0 | 0c00800c | 00000000 |
| 00009000 | 00400000 | 00280080 | 000c000c | 00800000 | 00088000 |
| 00400000 | 00000000 | 80000100 | 10000040 | 21800041 | 00300004 |
| 00040000 | c0200000 | 60000000 | 00040000 | 00004000 | 00460000 |
| c0000000 | 00000280 |          |          |          |          |

&gt;D00521

|          |          |          |          |          |          |
|----------|----------|----------|----------|----------|----------|
| 00000000 | 01000000 | 00100102 | 00050600 | 00100000 | 00004000 |
| 00000000 | 21000000 | 00100900 | 000808c0 | 08300000 | 50018800 |

|          |          |          |          |          |          |
|----------|----------|----------|----------|----------|----------|
| 00000002 | 00200000 | 00000000 | 00080008 | 00000000 | 02000000 |
| 00400000 | 00000201 | 00000100 | 18000020 | 01000000 | 00500010 |
| 00000000 | a0000000 | 00000000 | 50000000 | 00000080 | 00060002 |
| 40000000 | 00002e00 |          |          |          |          |

&gt;D00519

|          |          |          |          |          |          |
|----------|----------|----------|----------|----------|----------|
| 0200c016 | 00822208 | 21000000 | 00b10220 | 00008012 | 14010200 |
| 08000000 | 00002c01 | 40000010 | 0008c842 | 80006004 | 22008840 |
| 0202000e | 40000009 | 802200c0 | 00000008 | 25002d00 | 00000000 |
| 03500400 | 01046000 | c0002000 | 39010100 | 20000004 | 08520008 |
| 00086000 | 08080040 | 518800a0 | 08000c4c | 00000400 | 60860000 |
| 04004100 | 04030160 |          |          |          |          |

&gt;D00518

|          |          |          |          |          |          |
|----------|----------|----------|----------|----------|----------|
| 0000c010 | 00800200 | 01000000 | 00b00220 | 00000000 | 14000010 |
| 00000000 | 00000000 | 00000000 | 00004840 | 00002000 | 20008800 |
| 02000006 | 00000201 | 80220000 | 00000000 | 00000000 | 00000000 |
| 00000000 | 00002000 | 80000000 | 08000102 | 00000000 | 08500008 |
| 00002000 | 00180000 | 10000080 | 00000008 | 00000000 | 60020000 |
| 00000000 | 00030020 |          |          |          |          |

&gt;D00516

|          |          |          |          |          |          |
|----------|----------|----------|----------|----------|----------|
| 00000040 | 01010040 | 00000000 | 00010000 | 00280060 | 00000000 |
| 00000008 | 00000440 | 1000a000 | 03000000 | 00000002 | 42808000 |
| 80018800 | 02800000 | 00080000 | 140a8018 | 00000000 | 00000000 |
| 21402000 | 00000001 | 00000020 | 10000000 | 05000050 | 1d000010 |
| 00000400 | 00000000 | 00000000 | 00000220 | 24004200 | 00000000 |
| 00000000 | 10000000 |          |          |          |          |

&gt;D00515

|          |          |          |          |          |          |
|----------|----------|----------|----------|----------|----------|
| 00000000 | 00020040 | 00000000 | 00000000 | 00000020 | 00000000 |
| 00000008 | 00000000 | 10008000 | 02000000 | 00000002 | 42800000 |
| 80010800 | 00000000 | 00000000 | 14080018 | 00000000 | 00000000 |
| 01000000 | 00000000 | 00000000 | 00000000 | 05000040 | 14000010 |
| 00000000 | 00000000 | 00000000 | 00000400 | 44000000 | 00000000 |
| 00000000 | 00000000 |          |          |          |          |

&gt;D00513

|          |          |          |          |          |          |
|----------|----------|----------|----------|----------|----------|
| 04000002 | 00000008 | 20100108 | 00010600 | 00041080 | 02000000 |
| 06080000 | 00000008 | 00000000 | 00000840 | 00200004 | 40008000 |
| 00800806 | 00400000 | 01200041 | 000c200c | 10200000 | 00000004 |
| 00a00000 | 00060200 | 40000000 | 18008008 | 27800080 | 88000010 |
| 00002001 | 00000000 | 00000000 | 00800000 | 00000200 | 00060000 |
| 00040200 | 00200240 |          |          |          |          |

&gt;D00512

|          |          |          |          |          |          |
|----------|----------|----------|----------|----------|----------|
| 00000040 | 00000800 | 00000100 | 00010601 | 00080100 | 00010000 |
| 00010000 | 03005000 | 00000240 | 00180852 | 18200010 | 4000b001 |
| 09008801 | 00000008 | 40000000 | 80100008 | 00040802 | 06002002 |
| 00000000 | 00080000 | 00200100 | 38018600 | 80000010 | 81400014 |
| 00000080 | a0000000 | 40001000 | d0000000 | 0c200190 | 00060002 |
| 8c046000 | 20c00600 |          |          |          |          |

&gt;D00510

|          |          |          |          |          |          |
|----------|----------|----------|----------|----------|----------|
| 00014006 | 01000000 | 00580000 | 00000600 | 20000000 | 00002000 |
| 00000221 | 00000000 | 00004100 | 000009e8 | 0038000c | 70019000 |
| 0c008408 | 00300000 | 200200c0 | 00000040 | 00040000 | 00000000 |
| 0c002034 | 00200001 | e0100000 | 1c000610 | 60006800 | 00300010 |
| 00000000 | 00000000 | 04000000 | 10000080 | 01008000 | 000e0013 |
| 00000000 | 00000308 |          |          |          |          |

&gt;D00505

|          |          |          |          |          |          |
|----------|----------|----------|----------|----------|----------|
| 00000004 | 00000000 | 00000100 | 00410600 | 00000000 | 00000000 |
| 00008000 | 00000800 | 00000000 | 00080840 | 08002008 | 40008000 |
| 00000000 | 00000002 | 00000000 | 00000000 | 00000000 | 02000000 |
| 00000000 | 00000000 | 00000000 | 18000000 | 40000000 | 81400010 |
| 00000000 | 80000000 | 00008000 | 00000000 | 04000000 | 000e0002 |
| 00000000 | 00010420 |          |          |          |          |

&gt;D00503

|          |          |          |          |          |          |
|----------|----------|----------|----------|----------|----------|
| 0020c002 | 00820600 | 00120000 | 05100600 | 20040080 | 08002000 |
| 08010010 | 00000000 | 00022000 | 00400d60 | 00244004 | 61008800 |
| 02000006 | 00002001 | 20120040 | 0208000a | 14841000 | 20000000 |
| 08200002 | 02024200 | e2100000 | 38000900 | 22800021 | 02180019 |
| 00006401 | 10000100 | 12204010 | 00000080 | 08008200 | 01060010 |
| 0000a000 | 00030220 |          |          |          |          |

&gt;D01276

|          |          |          |          |          |          |
|----------|----------|----------|----------|----------|----------|
| 0000200e | 09007400 | 00106142 | 14410600 | 000401a0 | 00018000 |
| 00010000 | 2208181c | 03900b80 | 50080de8 | 0830a01c | 4001b000 |
| 8c008802 | 00202002 | 201a0480 | 021e000c | 10020000 | 02082000 |
| 04700010 | 10400201 | c0000100 | 38288e10 | 73814041 | 83500018 |
| 00000000 | c0000002 | 10000040 | 90000060 | 0d004304 | 004e0413 |
| a0044800 | 000526a8 |          |          |          |          |

&gt;D01275

|          |          |          |          |          |          |
|----------|----------|----------|----------|----------|----------|
| 00050040 | 6b000808 | 2000050a | 40050700 | 88281051 | 4002c402 |
| 17103c40 | 09000a01 | 00200900 | 01080ae8 | 2c100000 | 4000db40 |

|          |          |          |          |          |          |
|----------|----------|----------|----------|----------|----------|
| 04008002 | 22a90000 | 01044021 | 2a28b008 | 08a00a00 | 02001100 |
| 13d8a008 | 40020201 | 00101520 | b8020260 | 07084068 | 0a420414 |
| 00800c00 | e0002201 | 00080800 | 64800024 | 02000383 | 00074802 |
| c2e00004 | 02420400 |          |          |          |          |

&gt;D01264

|          |          |          |          |          |          |
|----------|----------|----------|----------|----------|----------|
| 00050040 | 6b000808 | 2000050a | 40050700 | 88281051 | 4002c402 |
| 17103c40 | 09000a01 | 00200900 | 01080ae8 | 2c100000 | 4000db40 |
| 04008002 | 22a90000 | 01044021 | 2a28b008 | 08a00a00 | 02001100 |
| 13d8a008 | 40020201 | 00101520 | b8020260 | 07084068 | 0a420414 |
| 00800c00 | e0002201 | 00080800 | 64800024 | 02000383 | 00074802 |
| c2e00004 | 02420400 |          |          |          |          |

&gt;D01256

|          |          |          |          |          |          |
|----------|----------|----------|----------|----------|----------|
| 0000c012 | 01802222 | 07100000 | 03b00e20 | 20080010 | 14002000 |
| 08000000 | 0000240b | 50004010 | 005078c0 | 00202004 | e201c800 |
| 42028006 | 00000045 | 90620444 | 00008000 | 01ac6100 | 00000020 |
| 0a412200 | 02066403 | c0102000 | 18010110 | 20008000 | 18500018 |
| 02306018 | 00280144 | 104040a0 | 900004cc | 04008420 | 63060080 |
| 2402e000 | 00234270 |          |          |          |          |

&gt;D01240

|          |          |          |          |          |          |
|----------|----------|----------|----------|----------|----------|
| 00000040 | 81000000 | 00000100 | 00810300 | 80280040 | 00000800 |
| 00002880 | 08000440 | 01202000 | 01100028 | 40000100 | 40008000 |
| 00028000 | 02800001 | 00080400 | 002a9008 | 00820010 | 00000000 |
| 1341e010 | 00002001 | 00100020 | 01000a80 | 05008000 | 08000010 |
| 00001400 | 00000400 | 00404000 | a4000020 | 00000200 | 01000002 |
| 24a20000 | 00800010 |          |          |          |          |

&gt;D01228

|          |          |          |          |          |          |
|----------|----------|----------|----------|----------|----------|
| 00000002 | 01001008 | 60104008 | 00000600 | 00041010 | 00008004 |
| 04080000 | 00200000 | 0c000200 | 000000c0 | 00200004 | 40050000 |
| 00008804 | 08000000 | 01030000 | 0016000c | 00020000 | 00082000 |
| 00202000 | 00060201 | 40000000 | 18048c50 | 30800000 | 0010a018 |
| 00002400 | 00110022 | 00004400 | 10000000 | 00000200 | 00060001 |
| 80000008 | 30000200 |          |          |          |          |

&gt;D01223

|          |          |          |          |          |          |
|----------|----------|----------|----------|----------|----------|
| 00000002 | 01400020 | 80140300 | 8c090700 | 001800e0 | 000041e0 |
| 00009400 | 80000800 | 04000306 | 818000b0 | 0438000c | 40019004 |
| 06009001 | 01d81110 | 002a1080 | 001e400c | 00b78440 | 10804000 |
| 09c00800 | 00601001 | 800c0020 | 18050c10 | 27804045 | 0c600810 |
| 50000410 | 40001002 | 00000204 | 100008f2 | 00000208 | 81470003 |
| 40281000 | 000003c0 |          |          |          |          |

&gt;D01211

|          |          |          |          |          |          |
|----------|----------|----------|----------|----------|----------|
| 0003c00a | 01007801 | 00180121 | c8090620 | 2218008c | 00004020 |
| 0000b000 | 22301828 | 06000100 | 40020be0 | 00282004 | 4000b200 |
| 06008822 | 0260a000 | 00060441 | 001c040c | 140c0000 | 0200c000 |
| 08400000 | 80201203 | e0100000 | 3e068e00 | 23804860 | 0250001e |
| 00000002 | c0100000 | 20000460 | 900400c0 | 0802c118 | 02460013 |
| e0845000 | 80900ac0 |          |          |          |          |

&gt;D01198

|          |          |          |          |          |          |
|----------|----------|----------|----------|----------|----------|
| 0400000a | 44000008 | 20104108 | 00010600 | 00041080 | 02000060 |
| 020c0000 | 02001000 | 06000000 | 40000860 | 04200004 | 40008000 |
| 0080c806 | 00600000 | 01300441 | 000ca00c | 10200000 | 02000000 |
| 00a80000 | 00020200 | 40000000 | 18008008 | 27800080 | 88548010 |
| 00002001 | c0000000 | 00220000 | 80800000 | 00000300 | 00060008 |
| 20040000 | 00000240 |          |          |          |          |

&gt;D01196

|          |          |          |          |          |          |
|----------|----------|----------|----------|----------|----------|
| 00440000 | 00040009 | 00000040 | 00380400 | 00000000 | 00800401 |
| 00028100 | 10000010 | 00000100 | 10808002 | 00302000 | 40000480 |
| 90008404 | 00060001 | 80042000 | 0000400d | 40000000 | 00004200 |
| 00020020 | 00204000 | 00000080 | 00301690 | 20400000 | 00008000 |
| 20000000 | 2c000000 | 24000004 | 0001044c | 10000008 | 00050009 |
| 00040200 | 00010a68 |          |          |          |          |

&gt;D01183

|          |          |          |          |          |          |
|----------|----------|----------|----------|----------|----------|
| 00008002 | 00000800 | 00000100 | 00010200 | 00000000 | 00014000 |
| 00000010 | 00000040 | 00802100 | 00000850 | 00200004 | 40009800 |
| 06008004 | 00000000 | 00020040 | 00080008 | 00040000 | 02000000 |
| 0800800a | 00000000 | 41000000 | 08020b20 | 20000000 | 00400004 |
| 00042000 | 80000200 | 02080000 | 00001080 | 00408000 | 00260000 |
| c0000000 | 02020000 |          |          |          |          |

&gt;D01180

|          |          |          |          |          |          |
|----------|----------|----------|----------|----------|----------|
| 00040048 | 81000020 | 00000800 | 81010520 | 00080080 | 00000800 |
| 02010000 | 08000402 | 00004002 | 0050400c | 40040200 | 40008002 |
| 80020000 | 00800004 | 00000405 | 01089008 | 02c00000 | 00000220 |
| 23402018 | 00002021 | 00000020 | 10001000 | 05008400 | 08000010 |
| 00201402 | 00000400 | 00404800 | 800000a0 | 000c4200 | 01040000 |
| 24020000 | 80040090 |          |          |          |          |

&gt;D01164

|          |          |          |          |          |          |
|----------|----------|----------|----------|----------|----------|
| 0400c002 | 80000208 | 22100128 | 05810700 | 30101000 | 06002040 |
| 0a040000 | 28000000 | 00400800 | 00080ad0 | 08380024 | 50019800 |

|          |          |          |          |          |          |
|----------|----------|----------|----------|----------|----------|
| 06808006 | 08102001 | 11020041 | 000c2008 | 00048080 | 12000000 |
| 08400008 | 00026601 | 40100100 | 38200700 | 21002021 | 03410016 |
| 00002800 | 81100400 | 00120210 | 10001080 | 88008200 | 0006000b |
| 00000000 | 20020e00 |          |          |          |          |

&gt;D01136

|          |          |          |          |          |          |
|----------|----------|----------|----------|----------|----------|
| 00010000 | 01000000 | 00000000 | 00000400 | 00080000 | 00000000 |
| 00000000 | 00000000 | 00000000 | 00000080 | 00000000 | 40011000 |
| 04008008 | 00800000 | 00000000 | 00080008 | 00000000 | 00000000 |
| 02402000 | 00000001 | 00000000 | 10000a10 | 01000000 | 00000010 |
| 00000000 | 00000000 | 00000000 | 00000000 | 00000000 | 00040000 |
| 00020000 | 00000000 |          |          |          |          |

&gt;D01133

|          |          |          |          |          |          |
|----------|----------|----------|----------|----------|----------|
| 0081000e | 01044808 | 2000010a | 50850e80 | 00441068 | 00004800 |
| 02040001 | 01084002 | 00100900 | 100808c1 | 0911800c | 40039004 |
| 8c008022 | 00608008 | 010204c1 | 021c000c | 10008800 | 02003004 |
| 02200400 | 00c20801 | c0080100 | 3c080620 | 61840000 | 00400014 |
| 00202000 | 80400800 | 40020040 | 00000000 | 0140020d | 004f0c02 |
| 40200800 | 004484a0 |          |          |          |          |

&gt;D01122

|          |          |          |          |          |          |
|----------|----------|----------|----------|----------|----------|
| 00000002 | 00000000 | 02004100 | 10010200 | 00040070 | 00004000 |
| 00000000 | 00000040 | 00000b00 | 00080840 | 08100004 | 40009800 |
| 01008800 | 00010000 | 40060000 | 020c000c | 08028000 | 02800000 |
| 04200000 | 00400001 | 40010120 | 18008a20 | a1801002 | 00400110 |
| 00000400 | 80002000 | 00080040 | 00000000 | 04000204 | 00020402 |
| 40002000 | 02000400 |          |          |          |          |

&gt;D01119

|          |          |          |          |          |          |
|----------|----------|----------|----------|----------|----------|
| 00010002 | 47005200 | 24122d0a | 8c110740 | 00080080 | 00000000 |
| 80001080 | 20000004 | 00400880 | 024e48c0 | 08302200 | c004b080 |
| 0601b016 | 40242103 | 82183008 | 100c5008 | 14820000 | 02400108 |
| 60404000 | 00401305 | 40200920 | 78280e80 | 13020201 | 87400018 |
| 06042600 | 84000000 | 00004040 | 10000405 | 0c000200 | 0006002b |
| 30004000 | 03c32600 |          |          |          |          |

&gt;D01118

|          |          |          |          |          |          |
|----------|----------|----------|----------|----------|----------|
| 00204002 | 00820200 | 00120020 | 04100600 | 20040000 | 00002000 |
| 00010010 | 00000000 | 00022000 | 00400e40 | 00244004 | 61008000 |
| 00000002 | 00002000 | 20020040 | 02000002 | 04841000 | 20000000 |
| 08200002 | 02020000 | c2100000 | 38000000 | 20800000 | 0218001b |
| 00004401 | 10000300 | 02204010 | 00000080 | 08008200 | 01060000 |
| 0000a000 | 00030220 |          |          |          |          |

&gt;D01097

|          |          |          |          |          |          |
|----------|----------|----------|----------|----------|----------|
| 00008002 | 00002800 | 00004100 | 10000e00 | 00040020 | 00100000 |
| 01000000 | 02003001 | 00000000 | 00090040 | 00298004 | 40000800 |
| 0600884a | 00100004 | 00020400 | 02040104 | 00000000 | 02000002 |
| 00200008 | 00000000 | 40000000 | 28028700 | 20802000 | 0240000c |
| 00100800 | c0000200 | 00040040 | 80000000 | 08000104 | 00060001 |
| 80040000 | 00024200 |          |          |          |          |

&gt;D01071

|          |          |          |          |          |          |
|----------|----------|----------|----------|----------|----------|
| 00010000 | 09001020 | 00900000 | 00000c00 | 00000000 | 00000000 |
| 00080044 | 00002402 | 00004140 | 001001a0 | 00200000 | 41011000 |
| 0d029008 | 00000004 | 00000400 | 00000000 | 00000000 | 00000061 |
| 42002010 | 00000001 | 00020100 | 100d0610 | 00008000 | 00100018 |
| 00212000 | 00000000 | 00404000 | 90000000 | 00000000 | 00040611 |
| 040a0000 | 00000200 |          |          |          |          |

&gt;D01069

|          |          |          |          |          |          |
|----------|----------|----------|----------|----------|----------|
| 00010004 | 01005200 | 00102142 | 84010700 | 00080180 | 00000000 |
| 00010000 | 20000000 | 02200800 | 00080cc0 | 08302018 | 4003b004 |
| 06008012 | 01202003 | a0181188 | 000c1008 | 10820000 | 02000000 |
| 04500000 | 00000a01 | 80000120 | 38040e20 | 53004001 | 02500018 |
| 00000400 | 80000100 | 10010000 | 10000001 | 09000200 | 000e000b |
| 2000e000 | 00442608 |          |          |          |          |

&gt;D01064

|          |          |          |          |          |          |
|----------|----------|----------|----------|----------|----------|
| 0003c04a | 0100d800 | 02100100 | 90010600 | 001c84a0 | 00004020 |
| 00081980 | 3204501a | 06000100 | 400208e2 | 01200204 | 4000f480 |
| 06008832 | 02608021 | 00022440 | 021c000c | 110d1000 | 0200801c |
| 08600000 | 00008209 | 40101000 | 58049ea8 | 63814040 | 1050401c |
| 02000000 | c4000102 | 20000000 | 90040484 | 00404304 | 004e0001 |
| e0044000 | 40e10a80 |          |          |          |          |

&gt;D01061

|          |          |          |          |          |          |
|----------|----------|----------|----------|----------|----------|
| 0000600a | 03009e09 | e1104108 | 50250710 | 800c547a | 0200c440 |
| 020c4800 | 20181040 | 9e500b00 | 700809f0 | 0d308004 | 5085d800 |
| 8d008926 | 00618200 | a11b0041 | 0a1f300c | 08020260 | 9688f004 |
| 04698002 | 50620201 | 41110628 | 180c8ed8 | 3d885008 | 8970241c |
| 0004a402 | c021aba3 | 081a0060 | 90045075 | 0643420d | 0a060c5b |
| c0043800 | d2022620 |          |          |          |          |

&gt;D01027

|          |          |          |          |          |          |
|----------|----------|----------|----------|----------|----------|
| 00432002 | 05415842 | 803c4150 | 85050e00 | 023c00e6 | 04184090 |
| 10084e68 | 30003402 | 10204d21 | 21918cf7 | 0521800c | c0039002 |



|          |          |          |          |          |          |
|----------|----------|----------|----------|----------|----------|
| 0412b01a | 0bea2121 | 800a14c0 | 003ececc | 102f08b0 | 43808206 |
| 39f12000 | 4202726b | c00a00a1 | 3c030f33 | 27808001 | 0e540818 |
| 14220484 | f8020002 | 4e404240 | f2450d78 | 1e500210 | 8046805b |
| 759b000a | 48aba2a0 |          |          |          |          |

&gt;D01001

|          |          |          |          |          |          |
|----------|----------|----------|----------|----------|----------|
| 00008000 | 00002000 | 00000100 | 04010600 | 00000000 | 00000000 |
| 00000000 | 02001008 | 04000000 | 00010840 | 00200000 | 4000a800 |
| 02008806 | 00002001 | 00000400 | 00000000 | 00000000 | 02000000 |
| 00000000 | 00000000 | 00000800 | 28008700 | 00000002 | 02400008 |
| 00002000 | c0000200 | 00000000 | 80000100 | 08000100 | 00060001 |
| 08044000 | 00020200 |          |          |          |          |

&gt;D00998

|          |          |          |          |          |          |
|----------|----------|----------|----------|----------|----------|
| 00000002 | 80000008 | 60000008 | 00400200 | 00001000 | 08000000 |
| 82000000 | 00000800 | 04000200 | 00000840 | 00202004 | 00008000 |
| 00008402 | 08000002 | 01010041 | 00100008 | 00060800 | 00000000 |
| 08800000 | 00022600 | 40000000 | 08000c10 | 30000000 | 00002000 |
| 00000000 | 00010002 | 00000000 | 00000080 | 00008200 | 00060001 |
| 00000000 | 10030020 |          |          |          |          |

&gt;D00995

|          |          |          |          |          |          |
|----------|----------|----------|----------|----------|----------|
| 00000002 | 80000008 | 60000008 | 00000200 | 00001000 | 08000000 |
| 02000000 | 00000000 | 04000200 | 00000840 | 00200004 | 00008000 |
| 00008402 | 08000000 | 01010041 | 00100008 | 00060000 | 00000000 |
| 08000000 | 00022600 | 40000000 | 08000c10 | 30000000 | 00002000 |
| 00000000 | 00010002 | 00000000 | 00000080 | 00008200 | 00060001 |
| 00000008 | 10020000 |          |          |          |          |

&gt;D00994

|          |          |          |          |          |          |
|----------|----------|----------|----------|----------|----------|
| 00004002 | 80000008 | 20000000 | 00000600 | 00000000 | 00000000 |
| 02000000 | 00000000 | 00000000 | 00000840 | 00200004 | 40008000 |
| 00000002 | 00000000 | 00000040 | 00000008 | 00040080 | 00000000 |
| 08000000 | 00022400 | 40100000 | 08000000 | 20000000 | 00000000 |
| 00000000 | 00000000 | 00000000 | 00000080 | 00008000 | 00060000 |
| 00000000 | 00020200 |          |          |          |          |

&gt;D00970

|          |          |          |          |          |          |
|----------|----------|----------|----------|----------|----------|
| 00000000 | 00000008 | 20000108 | 00010200 | 00001040 | 00000000 |
| 02000000 | 00000000 | 00000000 | 00080840 | 08000000 | 40009000 |
| 01008002 | 00000000 | 41040001 | 00080008 | 08000000 | 02000000 |
| 00000000 | 00020000 | 00000000 | 08000a08 | 01000000 | 00400010 |
| 00000000 | 80000000 | 00000000 | 00000000 | 00000200 | 00020002 |
| 00002000 | 00000c00 |          |          |          |          |

&gt;D00969

|          |          |          |          |          |          |
|----------|----------|----------|----------|----------|----------|
| 00430092 | 80808020 | 05480180 | 11f10613 | 00088001 | 00104608 |
| 80038190 | 1006cc08 | 81800580 | 20508842 | 00306a00 | 7020a400 |
| a810a000 | 0001a103 | 8030e802 | 001c900c | 20002c80 | 12004181 |
| 00678030 | 90a36400 | 80040000 | 3a081ea1 | 60084800 | 38414028 |
| 02042000 | 8c21880d | 40442010 | 400505cc | 0842d438 | 201e3003 |
| d400500a | 442103e8 |          |          |          |          |

&gt;D00968

|          |          |          |          |          |          |
|----------|----------|----------|----------|----------|----------|
| 00000000 | 42000008 | 20000108 | 00010200 | 00001041 | 00000000 |
| 02000000 | 00000000 | 00000000 | 00080840 | 08000000 | 40009000 |
| 01008002 | 20000000 | 41040001 | 00080008 | 08000000 | 02000000 |
| 00082000 | 00020200 | 00400000 | 08000a00 | 01000000 | 00400010 |
| 00000000 | 80000000 | 00000000 | 00210000 | 00000280 | 00020002 |
| 00002400 | 00100400 |          |          |          |          |

&gt;D00965

|          |          |          |          |          |          |
|----------|----------|----------|----------|----------|----------|
| 00014006 | 01003810 | 40100120 | 00010e00 | 24000000 | 80000000 |
| 00000c04 | 00002009 | 14000000 | 00000a70 | 04280004 | 4000b004 |
| 04019080 | 09102000 | 20120140 | 00000010 | 00040000 | 02402000 |
| 08000000 | 00000011 | 48120100 | 38050600 | 20022000 | 0040001a |
| 00140000 | c0000000 | 00000000 | 900000a0 | 0a408000 | 00060001 |
| 20104000 | 04004200 |          |          |          |          |

&gt;D00964

|          |          |          |          |          |          |
|----------|----------|----------|----------|----------|----------|
| 00000004 | 00800008 | 40000100 | 00010600 | 00000060 | 00008004 |
| 00008000 | 01001000 | 00400100 | 00880840 | 08000008 | 40808800 |
| 80000800 | 00000000 | 00040000 | 0008000c | 08408000 | 02000000 |
| 00c00000 | 00200000 | 80000000 | 18008040 | 21000440 | 81400010 |
| 00000000 | a0000000 | 00008000 | 40000000 | 04000080 | 00060402 |
| 80040000 | 00000500 |          |          |          |          |

&gt;D00963

|          |          |          |          |          |          |
|----------|----------|----------|----------|----------|----------|
| 00010002 | 01040020 | 00000000 | 00480000 | 40010000 | 04000001 |
| 00000080 | 02000402 | 01000000 | 00100000 | 00100000 | 40401000 |
| 04028008 | 00000000 | 00000410 | 00000000 | 00000000 | 00000020 |
| 02092000 | 00020001 | 00002001 | 00000280 | 00008000 | 00000810 |
| 00200000 | 00000000 | 00404000 | 80000000 | 00000000 | 01000000 |
| 24020000 | 00000000 |          |          |          |          |

&gt;D00960

|          |          |          |          |          |          |
|----------|----------|----------|----------|----------|----------|
| 00000004 | 00800008 | 40000100 | 00010610 | 00001041 | 00008004 |
| 00008000 | 00001000 | 00400100 | 00080840 | 08000008 | 40008000 |

|          |          |          |          |          |          |
|----------|----------|----------|----------|----------|----------|
| 00000800 | 00000000 | 00040000 | 000c000c | 08408000 | 02000000 |
| 00400400 | 00200000 | 80000000 | 18008040 | 21800440 | 81400010 |
| 00000000 | 80000000 | 08008000 | 00800004 | 04000000 | 00060002 |
| 80040000 | 00000580 |          |          |          |          |

&gt;D00947

|          |          |          |          |          |          |
|----------|----------|----------|----------|----------|----------|
| 00004002 | 00405400 | 00101200 | 82000600 | 20000180 | 00008010 |
| 00000000 | 00000000 | 14000204 | 00004960 | 002c2004 | 60008000 |
| 00018002 | 00101200 | 00021048 | 00180108 | 10068400 | 00800000 |
| 08000800 | 00400200 | 60100000 | 180c0e90 | b2002002 | 00000018 |
| 00000400 | 00080002 | 18800000 | 00000081 | 00008200 | 80068011 |
| 80000000 | 00000200 |          |          |          |          |

&gt;D00904

|          |          |          |          |          |          |
|----------|----------|----------|----------|----------|----------|
| 00008002 | 00000000 | 00000100 | 00010200 | 00000040 | 00000020 |
| 00000010 | 08000040 | 00002000 | 00080841 | 08210004 | 40009800 |
| 03008004 | 00000400 | 40060040 | 00080008 | 08048000 | 02000000 |
| 08000002 | 00000000 | 40000400 | 48000b00 | 21000000 | 00400010 |
| 00002000 | 80000600 | 02000008 | 00001080 | 00008008 | 00261002 |
| 00002000 | 20020c00 |          |          |          |          |

&gt;D00903

|          |          |          |          |          |          |
|----------|----------|----------|----------|----------|----------|
| 00008002 | 00000000 | 00000100 | 00010200 | 00000040 | 00000020 |
| 00000010 | 08000040 | 00002000 | 00080841 | 08210004 | 40009800 |
| 03008004 | 00000400 | 40060040 | 00080008 | 08048000 | 02000000 |
| 08000002 | 00000000 | 40000400 | 48000b00 | 21000000 | 00400010 |
| 00002000 | 80000600 | 02000008 | 00001080 | 00008008 | 00261002 |
| 00002000 | 200a0400 |          |          |          |          |

&gt;D00902

|          |          |          |          |          |          |
|----------|----------|----------|----------|----------|----------|
| 00800000 | 8904f200 | 00100101 | 84010d01 | 803c00c1 | 00200200 |
| 00080180 | 38a02c08 | 01000600 | 011000ca | 80200040 | 4001c000 |
| 8002b002 | 01892000 | 02001408 | 391b9008 | 34210814 | 80000540 |
| 51c16018 | 0000e201 | 00000020 | 70152fb0 | 17008080 | 0a10001c |
| 00021403 | 88808c00 | 40c04000 | 90000121 | 0800c250 | 00040401 |
| ac0e0000 | 00204b01 |          |          |          |          |

&gt;D00900

|          |          |          |          |          |          |
|----------|----------|----------|----------|----------|----------|
| 00070040 | 09007020 | 00100000 | 80010700 | 00180080 | 00000800 |
| 02080180 | 38000402 | 11004000 | 00100088 | 40200000 | 41019001 |
| 0402801a | 018a0004 | 00001408 | 00081008 | 10a24020 | 00000060 |
| 62c12010 | 00000201 | 00000020 | 34040e80 | 13008000 | 02100018 |
| 10001400 | 00001400 | 00c04200 | 90010001 | 0c000200 | 00040401 |
| 04020000 | 00008210 |          |          |          |          |

## &gt;D00893

|          |          |          |          |          |          |
|----------|----------|----------|----------|----------|----------|
| 00010040 | 81040020 | 00000900 | 80010300 | 40080040 | 00000001 |
| 00000000 | 28000402 | 00004000 | 01100008 | 00000200 | 40009000 |
| 14028028 | 02820004 | 00000404 | 0008100c | 00820000 | 00000020 |
| 03402090 | 0000a001 | 00000020 | 00001a00 | 0140a000 | 00000012 |
| 00201400 | 00000400 | 00406200 | 80000000 | 00000200 | 0000000a |
| 24020000 | 00000800 |          |          |          |          |

## &gt;D00892

|          |          |          |          |          |          |
|----------|----------|----------|----------|----------|----------|
| 00092002 | 81000801 | 00100300 | 12010610 | 228c1020 | 04102018 |
| 800000a0 | 08000408 | 00000004 | 001008c0 | 00000084 | 60019000 |
| 1c028828 | 02e09000 | 21020442 | 820c004c | 00020400 | 8a800004 |
| 05602018 | 00102001 | 40100008 | 18028a18 | 31808020 | 80510018 |
| 01041001 | c2080000 | 08406200 | d0008641 | 00404004 | 80068040 |
| 24040200 | 00800a20 |          |          |          |          |

## &gt;D00889

|          |          |          |          |          |          |
|----------|----------|----------|----------|----------|----------|
| 0009a00a | 81000801 | 00104300 | 12050210 | 228c1025 | 00004410 |
| 90000200 | 00000400 | 10000100 | 00582850 | 08008084 | 60809800 |
| 960288a8 | 02a19000 | 20020402 | 0a4c000e | 00028400 | 02001004 |
| 05612018 | 40102003 | 41100008 | 08028a40 | 3180c020 | 0040001c |
| 01041000 | 80002280 | 88406040 | c0001041 | 00484205 | 00228002 |
| e4000004 | 20800e22 |          |          |          |          |

## &gt;D00887

|          |          |          |          |          |          |
|----------|----------|----------|----------|----------|----------|
| 1801600a | 01805801 | 00100102 | 12010610 | 21880020 | 0400a018 |
| 10004000 | 20081044 | 00400100 | 108808d0 | 01288084 | 6081d800 |
| 140090a8 | 03b09000 | 200200c0 | 880c000c | 00068008 | 82803004 |
| 0de02000 | 10500003 | c1120000 | 18068e50 | 31816020 | 0050051c |
| 00044001 | c0080080 | 08000208 | 900010c1 | 1000c104 | 00268443 |
| 800a8a20 | a0100620 |          |          |          |          |

## &gt;D00885

|          |          |          |          |          |          |
|----------|----------|----------|----------|----------|----------|
| 00008003 | 00000240 | 00000100 | 00050600 | 00090040 | 10004020 |
| 00000000 | 00000000 | 101881a8 | 000d08d1 | 09028008 | 40018d00 |
| 020118a4 | 00800400 | 00000080 | 000d001c | 00002000 | 02a40000 |
| 00404000 | 00800410 | 80001408 | 18008122 | 21004000 | 81400010 |
| 00002000 | 80000304 | 40040000 | 02000040 | 04000008 | 0046000a |
| 400c0000 | 40020400 |          |          |          |          |

## &gt;D00884

|          |          |          |          |          |          |
|----------|----------|----------|----------|----------|----------|
| 00050440 | 81040000 | 00000100 | 80810700 | c03c01c0 | 00a00801 |
| 02002a80 | 28000400 | 01200000 | 011000a8 | 40000200 | 40009001 |

|          |          |          |          |          |          |
|----------|----------|----------|----------|----------|----------|
| 1c028028 | 028a0000 | 00000404 | 002a900c | 00a20000 | 00000000 |
| 31c1a090 | 0000a001 | 00100020 | 10001a80 | 0740a000 | 08000012 |
| 00001400 | 00001400 | 00406000 | a4000020 | 00000240 | 00040000 |
| 24e20000 | 04000010 |          |          |          |          |

&gt;D00882

|          |          |          |          |          |          |
|----------|----------|----------|----------|----------|----------|
| 00008002 | 00000240 | 80000100 | 80010600 | 00080050 | 00004020 |
| 00000000 | 00004000 | 10100100 | 000808c0 | 08009008 | 40018900 |
| 020110a4 | 00890400 | 00001080 | 020c801c | 00201000 | 02000200 |
| 10400000 | 00000000 | 80001408 | 18000120 | 23000000 | 85400010 |
| 00002400 | 80002200 | 000c0200 | 00000030 | 04000200 | 0046000a |
| 40080000 | 00020400 |          |          |          |          |

&gt;D00829

|          |          |          |          |          |          |
|----------|----------|----------|----------|----------|----------|
| 00010000 | 01000000 | 00100000 | 00000400 | 00080800 | 00000000 |
| 00000000 | 00000000 | 00000000 | 00000080 | 00000000 | 40033000 |
| 04008010 | 01000000 | 00000000 | 00080008 | 00000000 | 00000000 |
| 00400000 | 00000001 | 00000000 | 10000a00 | 03000000 | 00380010 |
| 00000000 | 00000000 | 000000a0 | 90000000 | 00000000 | 02040000 |
| 00000000 | 00020200 |          |          |          |          |

&gt;D00827

|          |          |          |          |          |          |
|----------|----------|----------|----------|----------|----------|
| 00000000 | 00000c08 | a0000100 | 00410200 | 00000020 | 00024000 |
| 02000000 | 00000800 | 00000100 | 00800840 | 00000800 | 40008000 |
| 00048002 | 00000008 | 20000020 | 00082008 | 00002000 | 02000000 |
| 04800000 | 00020000 | 00000000 | 08020a20 | 00000000 | 00400004 |
| 00000040 | 80008000 | 00000000 | 00000000 | 01000000 | 00020410 |
| c0000000 | 00041000 |          |          |          |          |

&gt;D00826

|          |          |          |          |          |          |
|----------|----------|----------|----------|----------|----------|
| 00000000 | 00000200 | 00000100 | 00410600 | 00000000 | 00000000 |
| 00000000 | 00000800 | 00000800 | 000808c0 | 08102000 | 40008000 |
| 00000000 | 01000002 | 00000000 | 00000000 | 00000000 | 02000000 |
| 00000000 | 00000001 | 00000100 | 18000000 | 00000000 | 81400010 |
| 00000000 | 80000000 | 00000000 | 00000000 | 04000000 | 0006000a |
| 00000000 | 00010420 |          |          |          |          |

&gt;D00813

|          |          |          |          |          |          |
|----------|----------|----------|----------|----------|----------|
| 0002000a | 00005a00 | 00101100 | 50010600 | 001000e0 | 00080010 |
| 00002000 | 21101100 | 00100900 | 100808c0 | 08188024 | 40819800 |
| 07008002 | 00100000 | c00e0400 | 000c008c | 18008000 | 86000085 |
| 09600008 | 00000001 | 00000100 | 18068a10 | 2b802000 | 0054041c |
| 00000000 | e0000080 | 08000010 | 50001000 | 04080084 | 0086404b |
| a0007280 | 20000400 |          |          |          |          |

&gt;D00810

|          |          |          |          |          |          |
|----------|----------|----------|----------|----------|----------|
| 00000000 | 00000808 | 20000100 | 00010600 | 00000080 | 00024000 |
| 02000000 | 00000800 | 00000100 | 00000840 | 00200000 | 40008000 |
| 00008002 | 00000000 | 00000000 | 00082008 | 00000000 | 02000000 |
| 00000000 | 00020000 | 00000000 | 08020a20 | 02000000 | 00400004 |
| 00000000 | 80000000 | 00000000 | 00000000 | 00000000 | 00060000 |
| c0000000 | 00000200 |          |          |          |          |

&gt;D01984

|          |          |          |          |          |          |
|----------|----------|----------|----------|----------|----------|
| 00000002 | 44008028 | 2000652a | 10502211 | 00041060 | 00004000 |
| 16080104 | 00000008 | 04020100 | 0001485d | 01008004 | 42008000 |
| 00001806 | 40640000 | 81020041 | 022e200c | 24000008 | 0200030c |
| 80280820 | 00064000 | 42100002 | 1800aa20 | 21800000 | 01480000 |
| 00242000 | 90018000 | 48000048 | 00000000 | 00400304 | 00c60020 |
| 40080000 | 002590e0 |          |          |          |          |

&gt;D01981

|          |          |          |          |          |          |
|----------|----------|----------|----------|----------|----------|
| 00030000 | 01803010 | 40100100 | 84010600 | 00000080 | 00000004 |
| 00000000 | 22201008 | 00200100 | 000108c3 | 00202000 | 4003b800 |
| 8600880a | 00002003 | 80181409 | 00080018 | 10020000 | 02000000 |
| 02002000 | 00000201 | 80000000 | 38048e10 | 12000003 | 02500018 |
| 00000400 | c0000000 | 40000000 | 90000001 | 08000308 | 00060001 |
| 60064000 | 00802200 |          |          |          |          |

&gt;D01977

|          |          |          |          |          |          |
|----------|----------|----------|----------|----------|----------|
| 04008002 | 00000008 | 20100108 | 8a290600 | 01041080 | 02004010 |
| 0e088010 | 00000808 | 00002100 | 00000840 | 01300004 | 40009800 |
| 06804026 | 00401001 | 01081049 | 020ca10c | 10240000 | 10004008 |
| 08e0000a | 10264600 | 40000000 | 18041928 | 338040c0 | 00000010 |
| 00002401 | 00001000 | 02040000 | 00000081 | 00008208 | 00468008 |
| 40000000 | 002202c0 |          |          |          |          |

&gt;D01974

|          |          |          |          |          |          |
|----------|----------|----------|----------|----------|----------|
| 00400012 | 01801011 | 01180102 | 12b10210 | 00020009 | 10004018 |
| 01004400 | 00840014 | 0400c900 | 480a2850 | 0000a001 | 70008002 |
| 20028400 | 40201001 | a0220020 | 90040004 | 00028020 | 06000000 |
| 06003208 | 4000a009 | 84300000 | 08000228 | 20004000 | 0c500218 |
| 00850001 | a0084001 | 04000200 | 180010e9 | 60004207 | 20028000 |
| 400600a0 | 20010220 |          |          |          |          |

&gt;D01973

|          |          |          |          |          |          |
|----------|----------|----------|----------|----------|----------|
| 00000002 | 05804a00 | 00120102 | 41910610 | 00041100 | 40000810 |
| 00002000 | 00000000 | 00410980 | 010948c0 | 08702004 | 60018800 |

|          |          |          |          |          |          |
|----------|----------|----------|----------|----------|----------|
| 18010802 | 00640800 | 82200040 | 00040004 | 04000000 | 02008004 |
| 00202400 | 00002201 | c0000100 | 18208018 | 20800000 | 9b540019 |
| 00042000 | 80000000 | 08000040 | 14000000 | 04400002 | 00060002 |
| 10040208 | 01012620 |          |          |          |          |

## &gt;D01968

|          |          |          |          |          |          |
|----------|----------|----------|----------|----------|----------|
| 00001002 | 00040a00 | 80400000 | 00000401 | 000c00c0 | 00000400 |
| 00000000 | 00000000 | 00000100 | 00000080 | 30008008 | 40000000 |
| 00001000 | 00020000 | 00000080 | 000c800c | 00000028 | 00000000 |
| 00600000 | 24000000 | 80000000 | 15500000 | 23800000 | 04000000 |
| 00000200 | 00000000 | 00000000 | 00014030 | 20080000 | 00460000 |
| 60080000 | 00008005 |          |          |          |          |

## &gt;D01966

|          |          |          |          |          |          |
|----------|----------|----------|----------|----------|----------|
| 00014002 | 01801208 | 20100102 | 02010600 | 21080000 | 00006010 |
| 02000000 | 22001000 | 00000900 | 000808c0 | 08380004 | 5001d000 |
| 0c00882a | 01b01000 | 00020441 | 000c0008 | 00040000 | 02000280 |
| 08402018 | 00320201 | c0100100 | 18048630 | 21012000 | 00500018 |
| 00000800 | c0000000 | 00320000 | 90000081 | 00008102 | 0006800b |
| 60060000 | 00000600 |          |          |          |          |

## &gt;D01918

|          |          |          |          |          |          |
|----------|----------|----------|----------|----------|----------|
| 0480801a | 00884808 | 2100090a | 00b10600 | 00001080 | 02110002 |
| 02000000 | 02001000 | 00000000 | 00100840 | 00202004 | 6000b000 |
| 02848c02 | 80000001 | 812b0441 | 000a2008 | 10022000 | 02000002 |
| 00400800 | 00026000 | c0000000 | 08028e00 | 33040040 | 0840001c |
| 00200080 | c0000000 | 00800000 | 8000008c | 00000700 | 20060001 |
| a0044000 | 50010a60 |          |          |          |          |

## &gt;D01915

|          |          |          |          |          |          |
|----------|----------|----------|----------|----------|----------|
| 0009a002 | 81080801 | 80100180 | 42350610 | 27880004 | 00004010 |
| 80002200 | 00080400 | 02000180 | 001c2840 | 0020a084 | 60009800 |
| 16028028 | 02b01001 | a0020c02 | 000c000e | 00020000 | 02007000 |
| 05402010 | 40b06003 | 00100008 | 0e623a00 | 3180e864 | 00400118 |
| 01043000 | 81000280 | 80604000 | 8400006d | 0000400c | 00468802 |
| 64000800 | 209102e0 |          |          |          |          |

## &gt;D01911

|          |          |          |          |          |          |
|----------|----------|----------|----------|----------|----------|
| 00050040 | 63000808 | 21500502 | c0850700 | 882800d1 | 4002c402 |
| 12103c40 | 09000a41 | 00202900 | 01081ae0 | 2c300000 | 4000da40 |
| 1500802a | 02a90000 | 40041028 | 2a28b008 | 08a20a40 | 82001100 |
| 17d0a000 | 40020201 | 00101520 | b8020a60 | 170840e8 | 08420414 |
| 10800400 | e0002301 | 00080000 | 74814024 | 02000283 | 00074802 |
| c2e02004 | 02020600 |          |          |          |          |

## &gt;D01907

|          |          |          |          |          |          |
|----------|----------|----------|----------|----------|----------|
| 0000000a | 01c01800 | 80180510 | 89090e20 | 003800e4 | 0000c000 |
| 5000cc03 | 000008c0 | 00404100 | 018000b0 | 0c00800c | 40019004 |
| 00001000 | 038a2120 | 00081080 | 101eca0c | 002a0020 | 00000020 |
| 19c00000 | 80205003 | 80080020 | 14802850 | 27800040 | 0c000014 |
| 10008400 | 40100002 | 0e000200 | 10010070 | 00000208 | 00460014 |
| c1680000 | 000082c0 |          |          |          |          |

## &gt;D01900

|          |          |          |          |          |          |
|----------|----------|----------|----------|----------|----------|
| 00010000 | 01007100 | 00120100 | 04110644 | 00000080 | 00000010 |
| 00000000 | 2000000c | 00000880 | 000848c1 | 08300000 | 4005b100 |
| 06018012 | 00042001 | 80180000 | 00080008 | 14000000 | 02000000 |
| 00400008 | 00400201 | 40000100 | 38240e20 | 03000241 | 83500018 |
| 00000a00 | 80000000 | 00000000 | 10000000 | 0c000000 | 00060023 |
| 20004002 | 01012600 |          |          |          |          |

## &gt;D01888

|          |          |          |          |          |          |
|----------|----------|----------|----------|----------|----------|
| 00000004 | 43800208 | 2000010a | 00010600 | 00001000 | 4000000c |
| 02040000 | 00000000 | 00200a00 | 000808e0 | 48100008 | 40008000 |
| 00004002 | 20200000 | 01000001 | 00208108 | 00000000 | 02000000 |
| 00080000 | 00020203 | 80040300 | 18002000 | 40000000 | 08400010 |
| 40000000 | 80000000 | 00120000 | 20000000 | 01000200 | 000e000a |
| 00000000 | 00030400 |          |          |          |          |

## &gt;D01885

|          |          |          |          |          |          |
|----------|----------|----------|----------|----------|----------|
| 00050040 | 6b000808 | 2000050a | c0850700 | 88281051 | 4002c402 |
| 17103c40 | 09000a41 | 00202900 | 01080ae8 | 2c100000 | 4000db40 |
| 04008002 | 22a90000 | 01045021 | 2a28b008 | 08a00a00 | 02001100 |
| 13d8a008 | 40020201 | 00101520 | b8020260 | 07084068 | 0a420414 |
| 10800c00 | e0002201 | 00080800 | 64800024 | 02000383 | 00074802 |
| c2e00004 | 02400400 |          |          |          |          |

## &gt;D01866

|          |          |          |          |          |          |
|----------|----------|----------|----------|----------|----------|
| 0043c292 | 84408000 | 04484120 | 11f02609 | 002cc101 | 0012420c |
| 80834890 | 00046c00 | 81840580 | 6056a240 | 00386264 | 642028a8 |
| a230b890 | 0015a703 | 8410e002 | 001e900c | 22046ca0 | 32804109 |
| 88678020 | b0e36450 | 40142000 | 7e00cf83 | 20986800 | 22600022 |
| 06002000 | 0c30800d | 40463080 | c00501cc | 0842d018 | 20161803 |
| d400500a | 60f303e8 |          |          |          |          |

## &gt;D01862

|          |          |          |          |          |          |
|----------|----------|----------|----------|----------|----------|
| 0009200a | 81000801 | 00104300 | 12010210 | 228c1024 | 00002010 |
| 80000080 | 00000400 | 00000800 | 00182840 | 08108084 | 60809000 |



|          |          |          |          |          |          |
|----------|----------|----------|----------|----------|----------|
| 94028828 | 03e09000 | 20020442 | 024c000e | 00020400 | 06001004 |
| 05602018 | 00102003 | 40100108 | 08028a08 | 3180c020 | 80400018 |
| 01041000 | 80000081 | 88406040 | c0000041 | 00404004 | 00828002 |
| 24040000 | 20900620 |          |          |          |          |

&gt;D01844

|          |          |          |          |          |          |
|----------|----------|----------|----------|----------|----------|
| 00050040 | 05020000 | 00000000 | 81e10500 | 803c0040 | 00200000 |
| a0002800 | 08000c40 | 00202000 | 011000a0 | 00002000 | 4001d000 |
| 14008028 | 03884003 | 01401402 | 282b9008 | 00a00804 | 8000a000 |
| 11c0a000 | 0800c005 | 00100020 | 30000a00 | 070000a0 | 5a000054 |
| 17000427 | 00000001 | 40000a02 | a4000420 | 78028200 | 00040000 |
| 84e00008 | 00010860 |          |          |          |          |

&gt;D01842

|          |          |          |          |          |          |
|----------|----------|----------|----------|----------|----------|
| 04074000 | 03803018 | 2010010a | 02210f02 | 80181000 | 82000110 |
| 02000004 | 0a003644 | 00310800 | 002a28c0 | 09340000 | 5003f0c0 |
| 05809812 | 00201000 | 51001221 | 00082008 | 98204008 | 8202a100 |
| 00c80000 | 00420001 | 80020164 | 38358620 | 030010c0 | 81500018 |
| 00010006 | c0000401 | 80000208 | 90000001 | 2c300300 | 0006c003 |
| 240c6000 | 80c00e40 |          |          |          |          |

&gt;D01840

|          |          |          |          |          |          |
|----------|----------|----------|----------|----------|----------|
| 00000092 | 00800400 | 01104000 | 05b00600 | 000c0000 | 00000000 |
| 00020000 | 00000000 | 00000000 | 00400960 | 00202004 | 60008000 |
| 00000802 | 00402001 | 80e00040 | 00048004 | 00002000 | 00000000 |
| 00600000 | 00007e03 | c8000000 | 38008008 | 20800001 | ba400038 |
| 02000000 | 0000010c | 00000000 | 0000000c | 08000400 | 20060010 |
| 00040002 | 00030260 |          |          |          |          |

&gt;D01828

|          |          |          |          |          |          |
|----------|----------|----------|----------|----------|----------|
| 00000002 | 00a40800 | 00084100 | 00010210 | 00041600 | 80014060 |
| 00000400 | 40000200 | 02084120 | 40080850 | 08000024 | 4000b002 |
| 40008c00 | 01600088 | 00020050 | 000c000c | 00000000 | 42004004 |
| 04200080 | 00600000 | c8000000 | 0e068a68 | 20a04800 | 8078001c |
| 08040050 | 80000005 | 88000090 | 18140000 | 00402008 | 01860002 |
| c0140000 | 80000400 |          |          |          |          |

&gt;D01825

|          |          |          |          |          |          |
|----------|----------|----------|----------|----------|----------|
| 00010002 | 81400020 | 00100000 | 00491100 | 403c1440 | 04200004 |
| 00000880 | 0a000402 | 01200000 | 01100020 | 00100001 | 4000d000 |
| 14028028 | 02800000 | 00000410 | 08281008 | 00800000 | 80000020 |
| 1341a000 | 00022001 | 00000021 | 00000280 | 05008000 | 08520814 |
| 00200400 | 00000022 | 00404020 | b4000020 | 00000200 | 13000000 |
| 24a20000 | 00000200 |          |          |          |          |

&gt;D01811

|          |          |          |          |          |          |
|----------|----------|----------|----------|----------|----------|
| 00000000 | 00000808 | 20000100 | 00010600 | 00000000 | 00020000 |
| 02000000 | 00001400 | 00000000 | 00000840 | 00000000 | 40008000 |
| 00008802 | 00000000 | 00000000 | 00002008 | 00000000 | 02000000 |
| 00000000 | 00020000 | 00000000 | 08028600 | 00000000 | 00400004 |
| 00000000 | 80000000 | 00000000 | 00000000 | 00000000 | 00060000 |
| 80040000 | 00000000 |          |          |          |          |

&gt;D01767

|          |          |          |          |          |          |
|----------|----------|----------|----------|----------|----------|
| 00434292 | 84408000 | 04484120 | 11f02609 | 002cc101 | 0010420c |
| 80834890 | 00046c00 | 81840580 | 2054a240 | 00386264 | 642020a8 |
| a030a810 | 0015a503 | 8410e002 | 001e900c | 22046ca0 | 32804109 |
| 88678020 | b0a36450 | 40142000 | 7e00ce81 | 20986800 | 20600022 |
| 02002000 | 0c20800d | 40462080 | c00501cc | 0842d018 | 20161803 |
| d400500a | 60f103e8 |          |          |          |          |

&gt;D01765

|          |          |          |          |          |          |
|----------|----------|----------|----------|----------|----------|
| 0003804a | 01003a08 | 20100388 | d4010718 | 001c50e0 | 00000000 |
| 060c2000 | 22001448 | 81500000 | 000b38c0 | 08200004 | 4001b800 |
| 07008876 | 0168a000 | c11e1449 | 020c100c | 18a70000 | 83800004 |
| 05e90410 | 00020201 | 40010020 | 38068f18 | 338040a1 | 8350001c |
| 10043401 | c0001100 | 08560200 | 90000001 | 0c000304 | 0006084f |
| a4046200 | 00822e20 |          |          |          |          |

&gt;D01718

|          |          |          |          |          |          |
|----------|----------|----------|----------|----------|----------|
| 00002000 | 00001009 | 241a0108 | 22010219 | 00021041 | 00100088 |
| 02041000 | 20000004 | 02020120 | 00082a40 | 00004080 | 40409880 |
| 01008032 | 00201040 | a1080021 | 804c008e | 08020200 | 42001480 |
| 04000000 | 00120000 | 00802206 | 28000a00 | 11844208 | 04480092 |
| 00a02001 | 80000980 | 00020020 | 08404045 | 08004204 | 02020802 |
| 00002000 | 40000020 |          |          |          |          |

&gt;D01715

|          |          |          |          |          |          |
|----------|----------|----------|----------|----------|----------|
| 04000002 | 43001108 | 20106508 | 00310704 | 00091000 | 82000000 |
| 02040000 | 00000004 | 00400000 | 03084841 | 08200001 | 40009200 |
| 0180f002 | 600c0080 | 51000001 | 0208a008 | 04800408 | 02000300 |
| 00480000 | 00020301 | 00020000 | 18200604 | 01000000 | 83400018 |
| 00000000 | 80000020 | 40120400 | 00010040 | 04000200 | 0086000b |
| 08206010 | 83010640 |          |          |          |          |

&gt;D01712

|          |          |          |          |          |          |
|----------|----------|----------|----------|----------|----------|
| 0000002a | 00801800 | 00080000 | 02010600 | 00080040 | 0000c000 |
| 00008000 | 00000000 | 06400100 | 800000a0 | 0c00800c | 40000000 |

|          |          |          |          |          |          |
|----------|----------|----------|----------|----------|----------|
| 00009000 | 00400000 | 00280080 | 000c000c | 00800000 | 00008000 |
| 00400000 | 00000000 | 80000100 | 10000a40 | 21800041 | 00300004 |
| 00040000 | c0200000 | 60000000 | 00040000 | 00004000 | 00460000 |
| c0000000 | 00000a80 |          |          |          |          |

&gt;D01709

|          |          |          |          |          |          |
|----------|----------|----------|----------|----------|----------|
| 00010000 | 01000000 | 00000102 | 00010200 | 00000040 | 00000000 |
| 00000000 | 00000000 | 00000900 | 00080840 | 08100000 | 40009800 |
| 05008008 | 00200000 | 40040000 | 00080008 | 08000000 | 02000000 |
| 00002008 | 00000001 | 00000100 | 08000a00 | 01000000 | 00400010 |
| 00000800 | 80000000 | 00000000 | 00000000 | 00000002 | 01020002 |
| 00022000 | 00000c00 |          |          |          |          |

&gt;D01704

|          |          |          |          |          |          |
|----------|----------|----------|----------|----------|----------|
| 04010000 | 43000008 | 2000010a | 00210700 | 00081000 | 42000000 |
| 02040000 | 00000000 | 00000800 | 00080840 | 08100000 | 40009000 |
| 0480c00a | 20a00080 | 11000001 | 020ca00c | 00c00000 | 02000000 |
| 02482000 | 00020201 | 00000100 | 18000a00 | 01800400 | 00400010 |
| 00000000 | 80000000 | 00120000 | 00000000 | 00000202 | 0106000a |
| 04020000 | 000004c0 |          |          |          |          |

&gt;D01690

|          |          |          |          |          |          |
|----------|----------|----------|----------|----------|----------|
| 00004002 | 44003a08 | 62100129 | 04810600 | 20001000 | 00002040 |
| 02040000 | 02001008 | 00400800 | 00090ad0 | 08380024 | 50019000 |
| 0400c802 | 00102800 | 01024441 | 20048008 | 00048000 | 02000000 |
| 08080008 | 00020201 | 44100100 | 38268600 | 20002020 | 0344801e |
| 00040800 | c1000000 | 00220010 | 90001080 | 88408300 | 0006000b |
| 80040000 | 20000600 |          |          |          |          |

&gt;D01688

|          |          |          |          |          |          |
|----------|----------|----------|----------|----------|----------|
| 00000030 | 0004c400 | 20004140 | 08110600 | 00010080 | 01400801 |
| 84300280 | 20001400 | 01101100 | 8a184840 | 40241800 | c000a800 |
| 12088106 | 200d0000 | 00000002 | 001a000c | 34000400 | 02000300 |
| 000900e0 | 00040208 | 00000010 | 08000e84 | 42008040 | 04408018 |
| 00000008 | 90000020 | 00486000 | 40000050 | 00e00000 | 481e0001 |
| 24004010 | 83090288 |          |          |          |          |

&gt;D01667

|          |          |          |          |          |          |
|----------|----------|----------|----------|----------|----------|
| 00010000 | 01005200 | 00100102 | 84010700 | 000800a0 | 00000000 |
| 00000000 | 20000004 | 00000880 | 000808c0 | 08302000 | 4000b000 |
| 06008002 | 00203003 | 80181008 | 000e1008 | 10820200 | 02000000 |
| 00400000 | 00000201 | 00000120 | b8200e00 | 13004001 | 83400018 |
| 00000400 | 80000000 | 00000000 | 10000001 | 0c000200 | 0106000b |
| 20004000 | 00422600 |          |          |          |          |

&gt;D01665

|          |          |          |          |          |          |
|----------|----------|----------|----------|----------|----------|
| 00000000 | 01000000 | 00100000 | 00000400 | 00380080 | 00000000 |
| 00000000 | 20000000 | 00000000 | 00000080 | 00200000 | 40010000 |
| 00000002 | 03800000 | 00280000 | 00080008 | 10000000 | 00000000 |
| 03c02000 | 00000201 | 00000000 | 10000010 | 07000080 | 00100010 |
| 00000001 | 00000000 | 00000000 | 10000000 | 00000000 | 00040000 |
| 00020000 | 00000a00 |          |          |          |          |

&gt;D01582

|          |          |          |          |          |          |
|----------|----------|----------|----------|----------|----------|
| 0000800a | 00000a08 | 20100588 | 50010718 | 00045060 | 00000000 |
| 060c2000 | 00001040 | 80500000 | 000838c0 | 08000004 | 4001f800 |
| 03008866 | 00608000 | c10e0041 | 0a0c800c | 18830000 | 83800004 |
| 05280400 | 00020200 | 40010020 | 18028f18 | 25804000 | 89500014 |
| 00042400 | c0000100 | 08160000 | 10000020 | 04000204 | 0006084b |
| 80042200 | 02020420 |          |          |          |          |

&gt;D01578

|          |          |          |          |          |          |
|----------|----------|----------|----------|----------|----------|
| 08004002 | 00004038 | 20004108 | 00018310 | 80041041 | 02000102 |
| 06042400 | 01400200 | 00400004 | 001c0850 | 08000004 | 40009240 |
| 01008802 | 00000000 | 61042101 | 001c200c | 18010000 | 02008004 |
| 00282400 | 00021010 | 41420000 | 08008e00 | 21800040 | 06504010 |
| 00040000 | e0000000 | 08120020 | 50a04004 | 006023a0 | 10020002 |
| 02022400 | 04000400 |          |          |          |          |

&gt;D01565

|          |          |          |          |          |          |
|----------|----------|----------|----------|----------|----------|
| 0004800a | 01000a08 | 20100188 | 50010718 | 00155060 | 00000800 |
| 060c2000 | 08001442 | 80500000 | 001838c0 | 48000004 | 4041b800 |
| 03028866 | 00608000 | c10e0441 | 020c000c | 18830000 | 83800004 |
| 25280410 | 00020201 | 40010020 | 18028f18 | 2180c000 | 81500014 |
| 00243400 | c0000500 | 08564000 | 90000000 | 04000204 | 0006084b |
| 84042200 | 00820430 |          |          |          |          |

&gt;D01549

|          |          |          |          |          |          |
|----------|----------|----------|----------|----------|----------|
| 00010010 | 01007200 | 00100102 | 84010f00 | 00080080 | 00000000 |
| 00000004 | 20002008 | 00000800 | 000a08c0 | 08302000 | 4000b000 |
| 0e00b002 | 00202003 | 80181008 | 000c1008 | 30820010 | 02002001 |
| 00c00050 | 00000201 | 00020120 | 38110e00 | 13000083 | 02400018 |
| 00012402 | 80000000 | 00000000 | 10000001 | 08000200 | 0006000b |
| 20004000 | 00420600 |          |          |          |          |

&gt;D01547

|          |          |          |          |          |          |
|----------|----------|----------|----------|----------|----------|
| 00000000 | 00c01a00 | 00020100 | 00110200 | 00060041 | 00000020 |
| 00000000 | 00004002 | 00000a00 | 100a1840 | 08100400 | 70009000 |

|          |          |          |          |          |          |
|----------|----------|----------|----------|----------|----------|
| 09008000 | 00010000 | 50040000 | 101c0008 | 0c009000 | 02000004 |
| 0020c010 | 00040001 | 88000100 | 08160a00 | 01800000 | 0060001d |
| 01003000 | 80000800 | 20008120 | 00804004 | 00800240 | 01030002 |
| 80002100 | 00010520 |          |          |          |          |

&gt;D01513

|          |          |          |          |          |          |
|----------|----------|----------|----------|----------|----------|
| 00004202 | 00000800 | 00100100 | 40010600 | 20000040 | 00000000 |
| 00000000 | 00000400 | 00000000 | 00080840 | 08200004 | 60009000 |
| 01008000 | 00018000 | 40060040 | 00080008 | 08040000 | 02000100 |
| 08000000 | 00000000 | 40100000 | 18000a00 | 21000000 | 00400010 |
| 00000000 | 80000000 | 00000000 | 00000080 | 00008000 | 00060002 |
| 04002000 | 00000600 |          |          |          |          |

&gt;D01475

|          |          |          |          |          |          |
|----------|----------|----------|----------|----------|----------|
| 00002000 | 00000000 | 00100100 | 02010a00 | 00000040 | 00000010 |
| 00000800 | 08002040 | 00200100 | 00082860 | 08000000 | 50009800 |
| 01008000 | 00001000 | 40040000 | 00280008 | 08020220 | 02000000 |
| 44008000 | 10000000 | 00010020 | 08010a00 | 11000000 | 00400010 |
| 00000404 | 80000000 | 80000000 | 24000041 | 00404200 | 00028002 |
| 00002000 | 00000600 |          |          |          |          |

&gt;D01441

|          |          |          |          |          |          |
|----------|----------|----------|----------|----------|----------|
| 0001e202 | 00010800 | 80004100 | 44550610 | 09041004 | 04004000 |
| 00002800 | 02081200 | 00000100 | 00010840 | 00282004 | 6000d810 |
| 82008802 | 0010a002 | 80020440 | 800c0004 | 00060000 | 12006004 |
| 0c600000 | 10a00006 | 40100000 | 2c02a600 | 31812860 | 0240011c |
| 000c0003 | c0180000 | 08000600 | 800110e0 | 08c0810c | 00460801 |
| c0040800 | 200102a2 |          |          |          |          |

&gt;D01432

|          |          |          |          |          |          |
|----------|----------|----------|----------|----------|----------|
| 1005007a | 29809a00 | 03105112 | 52710f10 | 801c1021 | 00320810 |
| 131843c0 | 3e203601 | 01010940 | 003828ca | 4931a204 | 5081d801 |
| 9c02899a | 01e99002 | 800604e4 | 420e914c | 24a6020c | 06000146 |
| 70e12c1a | 0000ca01 | e0920120 | 18158e98 | 2580e0e0 | 88540018 |
| 011c7401 | c0209c01 | 8848ce44 | 908000a3 | 00500306 | 0087840f |
| 24060000 | a0a16e31 |          |          |          |          |

&gt;D01425

|          |          |          |          |          |          |
|----------|----------|----------|----------|----------|----------|
| 04012000 | 01007408 | 2010010a | 04010e02 | 00081081 | 00000000 |
| 02000004 | 2000200c | 00210880 | 000a09e0 | 08340000 | 4003f000 |
| 0780b002 | 00202000 | 81281001 | 00082008 | 10000010 | 82028000 |
| 00c02040 | 00020201 | 00000100 | 383d0610 | 130000c1 | 83500018 |
| 00010001 | 80000000 | 00000008 | 10000001 | 0c000302 | 00060013 |
| 20024000 | 00002600 |          |          |          |          |

## &gt;D01397

|          |          |          |          |          |          |
|----------|----------|----------|----------|----------|----------|
| 00424292 | 80808000 | 05484120 | 11f10e01 | 080c8011 | 00104208 |
| 84030090 | 08846c00 | 81a08580 | 20508ae0 | 04386204 | 6021a008 |
| a010a806 | 0011a103 | 8230c002 | 023c900c | 28062c80 | 12004101 |
| 9867c020 | 90a36400 | c0140000 | 3e018eb1 | 20886800 | 2870022a |
| 02002420 | cc20a00d | 604c3091 | 640501cc | 0842d658 | 20161803 |
| de00500a | 403103e8 |          |          |          |          |

## &gt;D01370

|          |          |          |          |          |          |
|----------|----------|----------|----------|----------|----------|
| 0000800a | 15c01800 | 00080000 | 88090620 | 00180060 | 0000c000 |
| 00008c00 | 00000800 | 00400100 | 018000b0 | 0c00800c | 40019004 |
| 03001008 | 03880100 | c0081480 | 101c800c | 00200020 | 00000000 |
| 19c00000 | 80203001 | 80080020 | 10000150 | 25800040 | 08000014 |
| 10000400 | 40000202 | 00000200 | 10000060 | 00000208 | 00460000 |
| c0282000 | 000200c0 |          |          |          |          |

## &gt;D01367

|          |          |          |          |          |          |
|----------|----------|----------|----------|----------|----------|
| 00010002 | 81400020 | 00100000 | 00481000 | 40281400 | 04000000 |
| 00000080 | 02000402 | 01000000 | 00100000 | 00100000 | 40005000 |
| 04028028 | 00800000 | 00000410 | 00080008 | 00000000 | 00000020 |
| 02412000 | 00022001 | 00000001 | 00000280 | 01008000 | 00520810 |
| 00200000 | 00000002 | 00404020 | 90000000 | 00000000 | 03000000 |
| 24020000 | 00000200 |          |          |          |          |

## &gt;D01364

|          |          |          |          |          |          |
|----------|----------|----------|----------|----------|----------|
| 0000000a | 01000800 | 00004102 | 30000600 | 00040020 | 00000040 |
| 01000800 | 00000000 | 06000820 | 40080060 | 0c108004 | 40800000 |
| 80008800 | 02208040 | 00120000 | 020c001c | 00000000 | 06000000 |
| 02202008 | 00200001 | 40b02100 | 08018000 | 23820000 | 00d00010 |
| 00000000 | c0000000 | 00000060 | 00400090 | 00000006 | 00860002 |
| 00220000 | a0000420 |          |          |          |          |

## &gt;D01346

|          |          |          |          |          |          |
|----------|----------|----------|----------|----------|----------|
| 0000c002 | 00003a08 | 20100120 | 84090600 | 20000000 | 00006000 |
| 02000000 | 0200100c | 00000980 | 00090ac0 | 08380004 | 4000b000 |
| 06008802 | 0010a000 | 00020440 | 000c0008 | 00040000 | 02000000 |
| 08000008 | 00020201 | 40100100 | 38228e20 | 20002000 | 8340001e |
| 00000800 | c0000000 | 00120000 | 90000080 | 0c008100 | 0006000b |
| e0044000 | 00000600 |          |          |          |          |

## &gt;D01332

|          |          |          |          |          |          |
|----------|----------|----------|----------|----------|----------|
| 14090040 | 09000800 | 00500b02 | 80010600 | 2a120004 | 0000a002 |
| 800804c0 | 01000401 | 05000800 | 005848c8 | 08300200 | d0019280 |

|          |          |          |          |          |          |
|----------|----------|----------|----------|----------|----------|
| 0101801a | 00200001 | 41003022 | 0008200a | 05030400 | 82000048 |
| 00352010 | 00004205 | 00100900 | 5c980ac0 | 0940c000 | 10500814 |
| 03005000 | a4001181 | 00413000 | 50800004 | 02c00082 | 00060c02 |
| 8c022020 | 00c14f10 |          |          |          |          |

&gt;D01325

|          |          |          |          |          |          |
|----------|----------|----------|----------|----------|----------|
| 00010040 | 00800800 | 00000100 | 40011201 | 00004240 | 00020000 |
| 00001080 | 01002001 | 00020100 | 00480840 | 08000200 | c0009880 |
| 01008010 | 00000000 | 40042000 | 00080008 | 09010800 | 1201000a |
| 00100000 | 00000004 | 00000802 | 480a0a80 | 01000000 | 10400014 |
| 02000000 | a4000000 | 00000a00 | 40000004 | 00000180 | 00020002 |
| a0002000 | 00c10400 |          |          |          |          |

&gt;D02698

|          |          |          |          |          |          |
|----------|----------|----------|----------|----------|----------|
| 00050041 | 6f000008 | a000010a | 20810300 | 88281050 | 4000440e |
| 43943c80 | 0d000041 | 00202b00 | a1080868 | 4c100200 | 40009880 |
| 0400c012 | 22a10000 | 01082025 | 062a9108 | 00820200 | 0200010c |
| 1358a008 | 00820a13 | 00142720 | 58002aa0 | 05104040 | 08420410 |
| 42000c00 | e4002201 | 005a0000 | e4000024 | 03000283 | 0002080a |
| 40a00000 | 02c10400 |          |          |          |          |

&gt;D02671

|          |          |          |          |          |          |
|----------|----------|----------|----------|----------|----------|
| 00205002 | 01c20600 | 00120000 | 00900600 | 20040200 | 00022000 |
| 00011010 | 20000000 | 00022000 | 00400de0 | 00644004 | 71018020 |
| 00000002 | 00000100 | a0220140 | 02000002 | 04841000 | 20000000 |
| 08202002 | 02022201 | e2100002 | 18000010 | 20800000 | 08180019 |
| 00004401 | 10000100 | 02204810 | 10000080 | 00008200 | 01060010 |
| 0102a000 | 00012220 |          |          |          |          |

&gt;D02655

|          |          |          |          |          |          |
|----------|----------|----------|----------|----------|----------|
| 00002006 | 01801c08 | 60004100 | 080a0610 | 010c1010 | 04014004 |
| 02008002 | 01204800 | 11000100 | 000000c1 | 0000000c | c0019000 |
| 08009847 | 00810000 | 000200c0 | 120d000c | 00028000 | 02800404 |
| 00610400 | 40220200 | c0080020 | 1c058a70 | 71800843 | 8260011c |
| 00042401 | 80002000 | 480d8000 | 80000800 | 04400200 | 000e0440 |
| c0080004 | 00020060 |          |          |          |          |

&gt;D02581

|          |          |          |          |          |          |
|----------|----------|----------|----------|----------|----------|
| 04004002 | 00405009 | 20101708 | 00410600 | 200010a1 | 0000c000 |
| 02000000 | 00000008 | 00002304 | 00800840 | 002c0004 | 40018010 |
| 00808022 | 00110000 | 01021041 | 02180008 | 00668000 | 02800000 |
| 08a00800 | 40420000 | 40100000 | 18100d30 | 37002482 | 08c01018 |
| 00000000 | 80002002 | 18040000 | 000000c0 | 00008200 | 80060401 |
| c0000004 | 00000200 |          |          |          |          |

&gt;D02580

|          |          |          |          |          |          |
|----------|----------|----------|----------|----------|----------|
| 00002004 | 08400000 | 001a0100 | 22011600 | 00000400 | 00100000 |
| 00000000 | 20001000 | 00020100 | 40000848 | 00110000 | 40008000 |
| 00008840 | 00201040 | 70000000 | 0804000e | 02000200 | 02020400 |
| 06000000 | 09100000 | 00802000 | 08008608 | 40800200 | 60480084 |
| 00000000 | 80000002 | 08800020 | 08401001 | 00000004 | 024e0003 |
| 80040000 | 400400a0 |          |          |          |          |

&gt;D02579

|          |          |          |          |          |          |
|----------|----------|----------|----------|----------|----------|
| 00000006 | 08001800 | 00004100 | 00000600 | 00040000 | 00000000 |
| 00000000 | 00001004 | 00000000 | 00000048 | 00100004 | 40008000 |
| 80008800 | 00200000 | 20000000 | 00040004 | 00000008 | 02000000 |
| 04200000 | 00000000 | 40000000 | 08008600 | 60800000 | 00000014 |
| 00004000 | 00000000 | 00000000 | 00000000 | 00000000 | 004e0002 |
| 80010000 | 000400a0 |          |          |          |          |

&gt;D02566

|          |          |          |          |          |          |
|----------|----------|----------|----------|----------|----------|
| 00000000 | 21000000 | 00100102 | 00010600 | 00000000 | 00000002 |
| 10000400 | 01000001 | 00100800 | 000808c0 | 08300000 | 40018000 |
| 00000000 | 00200000 | 00000020 | 00080000 | 00000200 | 02001000 |
| 02102000 | 00000001 | 00000100 | 18000010 | 00084000 | 00500010 |
| 00800000 | a0000001 | 00000000 | 50000000 | 02000082 | 00060002 |
| 00020000 | 00000600 |          |          |          |          |

&gt;D02564

|          |          |          |          |          |          |
|----------|----------|----------|----------|----------|----------|
| 00000000 | 00000000 | 00000100 | 00010600 | 00402000 | 00000000 |
| 00000000 | 02101000 | 00000000 | 00000840 | 00200000 | 40008000 |
| 00000802 | 00000000 | 00100400 | 00000000 | 00000000 | 02000000 |
| 00000000 | 00000000 | 00000000 | 08008000 | 00010000 | 00600000 |
| 00000000 | c0000000 | 00000000 | 80000000 | 00000100 | 00060000 |
| 00040000 | 00020200 |          |          |          |          |

&gt;D02563

|          |          |          |          |          |          |
|----------|----------|----------|----------|----------|----------|
| 04004002 | 00405009 | 20101708 | 00010700 | 20001080 | 02008000 |
| 02000000 | 00000008 | 00002204 | 01008840 | 002c0004 | 40018010 |
| 00808022 | 00100000 | 11021041 | 00182008 | 00268000 | 00800000 |
| 09c00800 | 00420001 | 40100000 | 18100d10 | 37002082 | 0a500018 |
| 00000000 | 00000002 | 18040020 | 900000c0 | 00008200 | 88060001 |
| 80000000 | 00000200 |          |          |          |          |

&gt;D02562

|          |          |          |          |          |          |
|----------|----------|----------|----------|----------|----------|
| 00000008 | 01000200 | 00100102 | 10510600 | 00402000 | 00000000 |
| 00000000 | 22101200 | 00000800 | 000808c0 | 08302000 | 40008000 |



|          |          |          |          |          |          |
|----------|----------|----------|----------|----------|----------|
| 00000882 | 00201002 | 80100400 | 00060008 | 00000000 | 02000000 |
| 00000000 | 00000201 | 00020100 | 98008000 | 00014000 | 00600010 |
| 00000000 | c0000000 | 00004000 | 90000000 | 00000100 | 0106000a |
| 00040020 | 00010620 |          |          |          |          |

&gt;D02561

|          |          |          |          |          |          |
|----------|----------|----------|----------|----------|----------|
| 00008000 | 00002800 | 00000100 | 84010600 | 00000080 | 00000000 |
| 00000000 | 02001008 | 00000000 | 00090840 | 00200000 | 40008800 |
| 02008846 | 00002000 | 00101408 | 00080108 | 10000000 | 02000000 |
| 00000000 | 00000000 | 00000000 | 28028700 | 12000000 | 0240000c |
| 00002400 | c0000000 | 00040000 | 80000001 | 08000300 | 00060001 |
| 80040000 | 00020200 |          |          |          |          |

&gt;D02560

|          |          |          |          |          |          |
|----------|----------|----------|----------|----------|----------|
| 00414000 | 01208208 | a0180108 | 00010600 | 00081200 | 0000000a |
| 02004000 | 60200201 | 00004900 | 000808c0 | 083000a2 | d0018800 |
| 40080412 | 00000080 | 01000021 | 00040008 | 00004000 | 02000008 |
| 08000000 | 00020205 | 00000900 | 18000008 | 00000000 | 00480010 |
| 08000010 | 80000200 | 04020014 | 18040000 | 00002200 | 0116020a |
| 08000008 | 08400600 |          |          |          |          |

&gt;D02559

|          |          |          |          |          |          |
|----------|----------|----------|----------|----------|----------|
| 00004002 | 00405001 | 40101700 | 00010600 | 24004080 | 00008000 |
| 00000000 | 00000000 | 00000204 | 00000850 | 002c0004 | 40018000 |
| 00008000 | 00100000 | 00021040 | 00180008 | 00068000 | 02800000 |
| 08800800 | 00400000 | 40100000 | 18100d10 | 37002082 | 08400018 |
| 00040000 | 80000002 | 18000000 | 000000c0 | 00408200 | 80060001 |
| 80000000 | 00000200 |          |          |          |          |

&gt;D02558

|          |          |          |          |          |          |
|----------|----------|----------|----------|----------|----------|
| 00040000 | 46000008 | 60000108 | 00010600 | 00201000 | 00000000 |
| 02000000 | 02001000 | 04000200 | 00080840 | 08200000 | 4000d000 |
| 14008a02 | 20000000 | 01010001 | 001a0008 | 00020000 | 02000000 |
| 01480000 | 00020201 | 00000000 | 08008e10 | 15000000 | 0044a018 |
| 00000000 | 80010022 | 00000000 | 80000000 | 00000302 | 00060003 |
| 80040000 | 10000600 |          |          |          |          |

&gt;D02556

|          |          |          |          |          |          |
|----------|----------|----------|----------|----------|----------|
| 0202000e | 00800208 | c0101900 | 12010601 | 000806a0 | 0000c014 |
| 40000080 | 000d81c8 | 00020d00 | 00c948c0 | 08308a08 | d0818600 |
| 04000050 | 00801001 | 01a22081 | 000c000c | 05428200 | 06002280 |
| 04c02018 | 10300001 | a0000900 | 580000e0 | 23004448 | 8d410010 |
| 02801800 | 8d100064 | 08200008 | 01001365 | 04004004 | 04a6940a |
| e8000880 | 20010f11 |          |          |          |          |

&gt;D02487

|          |          |          |          |          |          |
|----------|----------|----------|----------|----------|----------|
| 00008002 | 00000010 | 00000000 | 00000e00 | 02000000 | 00000000 |
| 00000000 | 01002001 | 00000000 | 00000842 | 10200034 | 40008800 |
| 02000004 | 00000008 | 00000040 | 00000000 | 00060800 | 00000000 |
| 08000000 | 00000000 | 40120004 | 28000900 | 30010000 | 00000010 |
| 00502000 | 00010000 | 40080000 | 00002080 | 00208090 | 00060000 |
| 00000000 | 06024000 |          |          |          |          |

&gt;D02451

|          |          |          |          |          |          |
|----------|----------|----------|----------|----------|----------|
| 00000002 | 01800200 | 00101102 | 00810610 | 04080160 | 00000000 |
| 01002000 | 00001000 | 80500900 | 108818c0 | 28108008 | 50818800 |
| 80001800 | 00b00800 | 00030080 | 000c0004 | 00408000 | 06000000 |
| 00c82008 | 40010201 | 80100500 | 18008010 | 21000440 | 81400414 |
| 00040000 | c0000208 | 00000000 | 10000080 | 84000006 | 0046040a |
| 400c0004 | 20020400 |          |          |          |          |

&gt;D02441

|          |          |          |          |          |          |
|----------|----------|----------|----------|----------|----------|
| 04030002 | 10000008 | 2000084a | 00380200 | 004c1000 | 20808000 |
| 020a0000 | 00008018 | 00400000 | 00009844 | 00002a04 | 50008000 |
| 00800226 | 02620003 | 810020c1 | 000e040c | 00000000 | 00000080 |
| 00200010 | 01024000 | 40000000 | 48000880 | 60800080 | 02010200 |
| 00042000 | 2c006000 | 40000000 | 0001080c | 00000200 | 004a0000 |
| 00000000 | 01c10460 |          |          |          |          |

&gt;D02418

|          |          |          |          |          |          |
|----------|----------|----------|----------|----------|----------|
| 00004026 | 42000a08 | 60100108 | 00010e00 | 20001000 | c0026012 |
| 02002004 | 00002809 | 04200b80 | 000808c0 | 08300004 | 40028000 |
| 00009222 | 20000000 | 01030141 | 001c2008 | 00068000 | 82400020 |
| 08080018 | 00020241 | 40100100 | 18238e30 | 30020000 | 81402015 |
| 00151000 | 80010002 | 00040000 | 90001080 | 04008200 | 0006080b |
| c0080080 | 30004600 |          |          |          |          |

&gt;D02375

|          |          |          |          |          |          |
|----------|----------|----------|----------|----------|----------|
| 00000200 | 00008000 | 00000100 | 00010600 | 00402000 | 00400000 |
| 00100000 | 02001500 | 00000000 | 00000840 | 40200000 | 40008008 |
| 00000802 | 00010000 | 00000400 | 00000000 | 20000000 | 02000100 |
| 00000000 | 00000000 | 00000000 | 08008008 | 00000000 | 00400010 |
| 00000000 | c0200000 | 80480200 | 82800000 | 00100100 | 00060000 |
| 04040800 | 00000200 |          |          |          |          |

&gt;D02368

|          |          |          |          |          |          |
|----------|----------|----------|----------|----------|----------|
| 00000002 | 01400000 | 08100000 | 88090600 | 00180060 | 00004140 |
| 00009412 | 00000800 | 04000100 | 818000b0 | 0400000c | 40019004 |

|          |          |          |          |          |          |
|----------|----------|----------|----------|----------|----------|
| 00009000 | 03c80110 | 00281080 | 001c800c | 00200000 | 00000000 |
| 09c00000 | 00201001 | 800801a0 | 18000010 | 25800041 | 08700810 |
| 10000400 | 40200002 | 000002a0 | 90000060 | 20000208 | 09460000 |
| 40280020 | 000006c0 |          |          |          |          |

&gt;D02356

|          |          |          |          |          |          |
|----------|----------|----------|----------|----------|----------|
| 00000000 | 43000008 | 2010010a | 00010600 | 00001000 | c0000000 |
| 02040000 | 20000000 | 00100880 | 000808c0 | 08300000 | 40018000 |
| 00004002 | 20200000 | 01000001 | 0004800c | 00400000 | 02000000 |
| 00082000 | 00020201 | 00000100 | 38200010 | 00800400 | 81500010 |
| 00000000 | 80000000 | 00120000 | 10000000 | 04000200 | 0006000a |
| 04000000 | 00002680 |          |          |          |          |

&gt;D02355

|          |          |          |          |          |          |
|----------|----------|----------|----------|----------|----------|
| 0000000a | 00004800 | 00001100 | 50010600 | 000000e0 | 00080000 |
| 00000000 | 01101100 | 00000100 | 000808c0 | 08088024 | 40819800 |
| 03008000 | 00100000 | 40060400 | 000c008c | 18008000 | 02000005 |
| 00200000 | 00000000 | 00000000 | 18068a00 | 21802000 | 0044041c |
| 00000000 | e0000080 | 08000010 | 40001000 | 00080084 | 00060043 |
| 80007200 | 20000400 |          |          |          |          |

&gt;D02350

|          |          |          |          |          |          |
|----------|----------|----------|----------|----------|----------|
| 00000000 | 42000008 | 20000108 | 00010200 | 00001041 | 00000000 |
| 02000000 | 00000000 | 00000000 | 00080840 | 08000000 | 40009000 |
| 01008002 | 20000000 | 41040001 | 00080008 | 08000000 | 02000000 |
| 00082000 | 00020200 | 00400000 | 08000a00 | 01000000 | 00400010 |
| 00000000 | 80000000 | 00000000 | 00210000 | 00000280 | 00020002 |
| 00002400 | 00000400 |          |          |          |          |

&gt;D02342

|          |          |          |          |          |          |
|----------|----------|----------|----------|----------|----------|
| 04000000 | 00000008 | a0100108 | 00010600 | 00001090 | 02004000 |
| 02040000 | 00000040 | 00002100 | 00000840 | 00200000 | 40008000 |
| 00800002 | 00010000 | 01200001 | 02082008 | 10200000 | 02000000 |
| 00800000 | 00020200 | 00000000 | 18000020 | 07000080 | 08400010 |
| 00000401 | 80002000 | 004a0000 | 00800020 | 00000200 | 00060000 |
| 40000000 | 00000240 |          |          |          |          |

&gt;D02341

|          |          |          |          |          |          |
|----------|----------|----------|----------|----------|----------|
| 00008002 | 00000800 | 00000100 | 00010200 | 00000000 | 00014020 |
| 00000010 | 08000040 | 00802100 | 00000851 | 00210004 | 40009800 |
| 06008004 | 00000400 | 00020040 | 00080008 | 00040000 | 02000000 |
| 0800800a | 00000000 | 41000000 | 08020b20 | 20000000 | 00400004 |
| 00042000 | 80000600 | 02040000 | 00001080 | 00408008 | 00260000 |
| c0000000 | 00020000 |          |          |          |          |

&gt;D02335

|          |          |          |          |          |          |
|----------|----------|----------|----------|----------|----------|
| 00000000 | 00000828 | 00000102 | 00010200 | 20000000 | 0080800a |
| 20000001 | 00000403 | 81000800 | 00980840 | 08100000 | 40009000 |
| 00028000 | 00200000 | 00000400 | 00080000 | 00000604 | 02100020 |
| 00312000 | 00000801 | 00400100 | 080202c0 | 0010c000 | 00400014 |
| 01000000 | 84000001 | 00400000 | 00000000 | 00000000 | 00220002 |
| 84004000 | 00000410 |          |          |          |          |

&gt;D02333

|          |          |          |          |          |          |
|----------|----------|----------|----------|----------|----------|
| 14004042 | 01a0b809 | a208050a | 50c50f10 | 842e1277 | 0250c920 |
| 12806800 | 4200124d | 02286310 | 41000c70 | 41290144 | 4060e010 |
| 40808c02 | 0ab18480 | 112200c1 | 0a2efd8c | 048680c8 | 6e808044 |
| 19e8a800 | 00421803 | c0160020 | 18048e48 | a5a1300a | 0a58811c |
| 08144440 | 80006001 | 280a00d5 | ac9410a0 | 0340a304 | 01060c0b |
| c0a0c2a0 | 82014228 |          |          |          |          |

&gt;D02328

|          |          |          |          |          |          |
|----------|----------|----------|----------|----------|----------|
| 00030006 | 10004c08 | 22163128 | 30010701 | 810c00e0 | 800080e2 |
| 02000480 | 00018209 | 06420000 | d00c18d0 | 08018a0c | 70019000 |
| 0100b0b3 | 01e08020 | 400620c0 | 020d240e | 08200000 | 0200008c |
| 00200010 | 00620260 | 40001020 | dc010ad8 | 61804801 | 02710090 |
| 06100002 | cc000101 | 58000040 | 90080004 | 01800104 | 00161642 |
| 00306000 | 00415620 |          |          |          |          |

&gt;D02323

|          |          |          |          |          |          |
|----------|----------|----------|----------|----------|----------|
| 00008008 | 00000008 | 20100108 | 00010600 | 00001080 | 01000000 |
| 02000400 | 32001000 | 00001300 | 00000850 | 00200000 | 4000a000 |
| 82008802 | 01000000 | 01000401 | 00082008 | 10008000 | 02000000 |
| 00000000 | 00020300 | 10000000 | 08008a08 | 02000000 | 00420000 |
| 00000000 | c0000000 | 00000100 | 90000000 | 00300300 | 00060000 |
| 80144000 | 00010208 |          |          |          |          |

&gt;D02321

|          |          |          |          |          |          |
|----------|----------|----------|----------|----------|----------|
| 00000002 | 80001008 | 2000440a | 00300200 | 80041000 | 00000000 |
| 02008010 | 00000000 | 00002000 | 20000840 | 8030a004 | 40008000 |
| 00000c02 | 08400001 | 81080041 | 0006400c | 00040000 | 00000000 |
| 08200002 | 00024400 | 40000000 | 08048808 | 20800000 | 80800000 |
| 00000080 | 00000000 | 22008000 | 0000008c | 00008208 | 00060000 |
| 00040000 | 00010160 |          |          |          |          |

&gt;D02315

|          |          |          |          |          |          |
|----------|----------|----------|----------|----------|----------|
| 00010000 | 01000000 | 00000000 | 00000000 | 00080000 | 00000000 |
| 00000000 | 00000402 | 00000000 | 00100000 | 00000000 | 40001000 |

|          |          |          |          |          |          |
|----------|----------|----------|----------|----------|----------|
| 04028008 | 00800000 | 00000400 | 00080008 | 00000000 | 00000000 |
| 00402000 | 00000001 | 00000000 | 00000a00 | 01008000 | 00000010 |
| 00200000 | 00000000 | 00404000 | 80000000 | 00000000 | 00000000 |
| 24020000 | 00000000 |          |          |          |          |

&gt;D02308

|          |          |          |          |          |          |
|----------|----------|----------|----------|----------|----------|
| 00000000 | 00000000 | 00000000 | 00000000 | 00000000 | 00000000 |
| 00000000 | 00000400 | 01000000 | 00000000 | 00000000 | 40000000 |
| 00008000 | 00000000 | 00000000 | 00080008 | 00000000 | 00000000 |
| 00210010 | 00000000 | 00000000 | 00000a00 | 00000000 | 00000000 |
| 00001000 | 00001000 | 00400000 | 00000000 | 00000000 | 00000000 |
| 04000000 | 00000000 |          |          |          |          |

&gt;D02304

|          |          |          |          |          |          |
|----------|----------|----------|----------|----------|----------|
| 00010000 | 01000000 | 00000000 | 00000400 | 00080000 | 00000000 |
| 00000000 | 00000000 | 00000000 | 00000080 | 00000000 | 40013000 |
| 04008008 | 00800000 | 00000000 | 00080008 | 00000000 | 00000000 |
| 00402000 | 00000001 | 00000000 | 10000a30 | 03000000 | 00000010 |
| 00000000 | 00000000 | 00000000 | 00000000 | 00000000 | 00040000 |
| 00000000 | 00000000 |          |          |          |          |

&gt;D02290

|          |          |          |          |          |          |
|----------|----------|----------|----------|----------|----------|
| 00002000 | 00000000 | 00100100 | 02010200 | 00000040 | 00000010 |
| 00000000 | 00000000 | 00000100 | 00082840 | 08000000 | 50009800 |
| 01008000 | 00001000 | 40040000 | 00080008 | 08020200 | 02000000 |
| 04000000 | 10000000 | 00000000 | 08000a00 | 11000000 | 00400010 |
| 00000004 | 80000000 | 80000000 | 00000041 | 00404000 | 00028002 |
| 00002000 | 00000e00 |          |          |          |          |

&gt;D02289

|          |          |          |          |          |          |
|----------|----------|----------|----------|----------|----------|
| 00010000 | 81000020 | 00000000 | 00000000 | 00080000 | 00000000 |
| 00000080 | 00000402 | 01004000 | 00108000 | 00000000 | 40001000 |
| 04028028 | 00800004 | 00000400 | 00080008 | 00000000 | 00000020 |
| 02412000 | 00002001 | 00000000 | 00000280 | 01008000 | 00000010 |
| 00200000 | 00000000 | 00404000 | 80000000 | 00000000 | 01000000 |
| 24020000 | 00000000 |          |          |          |          |

&gt;D02267

|          |          |          |          |          |          |
|----------|----------|----------|----------|----------|----------|
| 00000000 | 00000800 | 00000000 | 00000000 | 00000000 | 00000000 |
| 00000000 | 00000000 | 00000000 | 00000000 | 00000000 | 00000000 |
| 00008000 | 00020000 | 00000000 | 00000008 | 00000028 | 00080004 |
| 00000000 | 00000000 | 00000000 | 05400800 | 00000000 | 00000000 |
| 00000000 | 00000000 | 00000000 | 00014000 | 00000000 | 00000000 |
| 04000000 | 00008804 |          |          |          |          |

## &gt;D02258

|          |          |          |          |          |          |
|----------|----------|----------|----------|----------|----------|
| 1801600a | 01805801 | 00100102 | 12010610 | 21880020 | 0400a018 |
| 10004000 | 20081044 | 00400100 | 108808d0 | 01288084 | 6081d800 |
| 140090a8 | 03b09000 | 200200c0 | 880c000c | 00068008 | 82803004 |
| 0de02000 | 10500003 | c1120000 | 18068e50 | 31816020 | 0050051c |
| 00044001 | c0080080 | 08000208 | 900010c1 | 1000c104 | 00268443 |
| 800a8a20 | a0100620 |          |          |          |          |

## &gt;D02229

|          |          |          |          |          |          |
|----------|----------|----------|----------|----------|----------|
| 0485009e | 01804408 | 21001108 | 15b10610 | 01285160 | 0001c002 |
| 06033800 | 01080300 | 06400900 | 900e18f0 | a130a004 | 6000d040 |
| 1c808022 | 02602801 | 81220081 | 020ca10c | 10002020 | 0680a00c |
| 01600c00 | 40666041 | c5000102 | 38010a60 | a5804860 | 2a700438 |
| 06142002 | c0000005 | 28930800 | 0004108c | 08404706 | 20460c02 |
| 41000802 | 402506e0 |          |          |          |          |

## &gt;D02214

|          |          |          |          |          |          |
|----------|----------|----------|----------|----------|----------|
| 00050040 | 6b000808 | 2000050a | 40050700 | 88281051 | 4002c402 |
| 17103c40 | 09000a01 | 00200900 | 01080ae8 | 2c100000 | 4000db40 |
| 04008002 | 22a90000 | 01044021 | 2a28b008 | 08a00a00 | 02001100 |
| 13d8a008 | 40020201 | 00101520 | b8020260 | 07084068 | 0a420414 |
| 00800c00 | e0002201 | 00080800 | 64800024 | 02000383 | 00074802 |
| c2e00004 | 02420400 |          |          |          |          |

## &gt;D02194

|          |          |          |          |          |          |
|----------|----------|----------|----------|----------|----------|
| 00410000 | 43004000 | 20120020 | 00100400 | 00000082 | 00100000 |
| 000002a0 | 28000404 | 05000400 | 001040c0 | 00200040 | 40033000 |
| 06038002 | 01040000 | 80080400 | 00080048 | 14010000 | 01000002 |
| 00010010 | 00400201 | 40008000 | 10000e80 | 03008700 | 00300018 |
| 04001200 | 00000400 | 00404000 | 90040500 | 00101000 | 00040021 |
| 24004000 | 43010a00 |          |          |          |          |

## &gt;D02193

|          |          |          |          |          |          |
|----------|----------|----------|----------|----------|----------|
| 00000000 | 00000000 | 00000000 | 20140400 | 00000004 | 00080000 |
| 00004000 | 00000000 | 00000000 | 02000020 | 00200000 | 40000010 |
| 00000000 | 00060424 | 00000000 | 00080068 | 00000020 | 00800001 |
| 20000000 | 02000402 | 00000020 | 06000a00 | 00000000 | 00000000 |
| 00480400 | 00040004 | 02008000 | 20010000 | 00002000 | 00040000 |
| 00200000 | 02018200 |          |          |          |          |

## &gt;D02176

|          |          |          |          |          |          |
|----------|----------|----------|----------|----------|----------|
| 00020000 | 00000000 | 00100000 | 00000400 | 00100080 | 00000000 |
| 00000000 | 00000000 | 00000000 | 00000080 | 00200000 | 40001000 |

|          |          |          |          |          |          |
|----------|----------|----------|----------|----------|----------|
| 14008000 | 00000000 | 00000000 | 00080008 | 00000000 | 00000000 |
| 01400000 | 00000001 | 00000000 | 10000a00 | 03000000 | 00000010 |
| 00000000 | 00000000 | 00000000 | 10000000 | 00000000 | 00040000 |
| 00000000 | 00800a00 |          |          |          |          |

&gt;D02173

|          |          |          |          |          |          |
|----------|----------|----------|----------|----------|----------|
| 04001008 | c7000628 | 6010090a | 90210702 | 00181041 | c2802000 |
| 12040001 | 2a001642 | 90044880 | 019818c8 | 08300308 | 40018040 |
| 00824882 | 20a10884 | 110e0425 | 120ca018 | 08004000 | 26108020 |
| 0f682410 | 8002aa01 | 04020100 | 18018010 | 0100e000 | 02d48410 |
| 00201480 | c0004409 | 00624200 | 90000000 | 04000302 | 0086c80a |
| 64060008 | 00002e40 |          |          |          |          |

&gt;D02168

|          |          |          |          |          |          |
|----------|----------|----------|----------|----------|----------|
| 00006002 | 03008a09 | a1104100 | 50250710 | 800c547b | 0200c440 |
| 02004800 | 02181440 | 9e500900 | 700808f0 | 05308004 | 4005d800 |
| 8d008926 | 00618200 | a01a0040 | 0a0d300c | 08020068 | 9688f004 |
| 04698002 | 50620201 | 41110628 | 18008a58 | 3d805008 | 89700414 |
| 0004e402 | c020ab81 | 08080060 | 90045075 | 0643430d | 0a060c4a |
| c404b800 | c2020220 |          |          |          |          |

&gt;D02166

|          |          |          |          |          |          |
|----------|----------|----------|----------|----------|----------|
| 18004002 | 42001808 | 60000122 | 04010600 | 000000a0 | 000b8040 |
| 12000440 | 01000201 | 00c00000 | 00080a50 | 08200004 | 40008000 |
| 00008002 | 00202000 | 00120040 | 30082008 | 10248200 | 02001001 |
| 08102000 | 00020200 | 44100000 | 28060240 | 22084018 | 02420016 |
| 00840000 | a0000001 | 00080000 | 40001080 | 2a488080 | 00060002 |
| 82000000 | 20030600 |          |          |          |          |

&gt;D02115

|          |          |          |          |          |          |
|----------|----------|----------|----------|----------|----------|
| 1003c00a | 01a05800 | 00180902 | 98090e30 | 0a1a10c8 | 0010c000 |
| 0000e000 | 22001801 | 10400100 | 000208c0 | 41210004 | 4000b000 |
| 06008822 | 02108000 | 008e0440 | 100c010c | 18040000 | 02000000 |
| 08400000 | 40200201 | 40100000 | 1c068e40 | 23810840 | 0040001c |
| 00140000 | c0000001 | 08008000 | 9000008c | 0000810c | 00461801 |
| e0044000 | 80800ac0 |          |          |          |          |

&gt;D02110

|          |          |          |          |          |          |
|----------|----------|----------|----------|----------|----------|
| 0000800a | 00000a08 | 20100188 | 50010718 | 00045060 | 00000000 |
| 060c2000 | 00001000 | 80500000 | 000808c0 | 08000004 | 4001b800 |
| 03008866 | 00608000 | c10e0041 | 020c000c | 18810000 | 83800004 |
| 01280400 | 00020200 | 40000000 | 18028f18 | 21804000 | 81500014 |
| 00042000 | c0000100 | 08160000 | 10000000 | 04000204 | 0006084b |
| 80042200 | 00020c20 |          |          |          |          |

## &gt;D02068

|          |          |          |          |          |          |
|----------|----------|----------|----------|----------|----------|
| 0000000a | 21004000 | 00004102 | 10810210 | 00041120 | 00000000 |
| 0100a000 | 00000001 | 10400800 | 00080840 | 08108004 | 40808000 |
| 00000800 | 00600800 | 00020040 | 020c0004 | 00000200 | 06000004 |
| 02202408 | 00000001 | 40100100 | 08008008 | 20804000 | 80400010 |
| 00040000 | 80000001 | 08008040 | 00000080 | 00400006 | 00860002 |
| 00040000 | 20020440 |          |          |          |          |

## &gt;D02042

|          |          |          |          |          |          |
|----------|----------|----------|----------|----------|----------|
| 00002002 | 00000001 | 00004100 | 10000210 | 00041062 | 04004048 |
| 10008801 | 00000000 | 06000100 | 40810070 | 05008004 | 40800000 |
| 00018800 | 00a00000 | 20160041 | 820c000c | 08420000 | 02001004 |
| 04a00000 | 40280002 | 40000000 | 88008020 | 31804401 | 02500400 |
| 00840001 | c0080000 | 08008640 | 00000045 | 00418004 | 00460000 |
| 40040000 | 00020280 |          |          |          |          |

## &gt;D02017

|          |          |          |          |          |          |
|----------|----------|----------|----------|----------|----------|
| 0000002a | 00801800 | 00080000 | 02010600 | 000800c0 | 0000c000 |
| 00008000 | 00000000 | 06400100 | 800000a0 | 0c20800c | 40000000 |
| 00009000 | 00400000 | 00280080 | 000c000c | 00800000 | 00008000 |
| 00400000 | 00000000 | 80000100 | 10000040 | 23800041 | 00300004 |
| 00040000 | c0200000 | 60000000 | 00040000 | 00004000 | 00460000 |
| c0000000 | 00000280 |          |          |          |          |

## &gt;D02008

|          |          |          |          |          |          |
|----------|----------|----------|----------|----------|----------|
| 0001800a | 4680fa08 | 22100108 | 55810e10 | 20041220 | 0018000e |
| 03042400 | 2300300d | 00600a80 | 000908f0 | 48318004 | 5081b000 |
| 1e00c8c2 | 2060a801 | 810204c1 | 0224818c | 00000200 | 02000027 |
| 00380408 | 00020a03 | c0060300 | 3823a608 | 20804021 | 9b468018 |
| 40143800 | e0000001 | 08324000 | f0000000 | 0f000384 | 0086000b |
| 20044200 | 20014620 |          |          |          |          |

## &gt;D03773

|          |          |          |          |          |          |
|----------|----------|----------|----------|----------|----------|
| 00018008 | 01805200 | 02100102 | 14010600 | 200800a0 | 00000000 |
| 01001000 | 22001004 | 00400880 | 000908d0 | 08302000 | 5001b000 |
| 060088c2 | 00202003 | 80180480 | 000c0008 | 10000200 | 02000020 |
| 00400008 | 00000201 | 80020100 | 38208e00 | 23004041 | 83400018 |
| 00000800 | c0000001 | 08004000 | 90000000 | 0c000100 | 0086000b |
| 20044000 | 00402600 |          |          |          |          |

## &gt;D03772

|          |          |          |          |          |          |
|----------|----------|----------|----------|----------|----------|
| 00010400 | 03005200 | 00100102 | 00050620 | 00080080 | 00000010 |
| 00000000 | 20000000 | 00000800 | 000808c0 | 09300001 | 4011b000 |



|          |          |          |          |          |          |
|----------|----------|----------|----------|----------|----------|
| 0600801a | 01a20000 | 82081000 | 00081008 | 10000028 | 02100003 |
| c2406010 | 00000201 | 00000100 | 19140e10 | 03c00000 | 80500018 |
| 00002002 | 80000000 | 00000400 | 10014000 | 000c0200 | 00060303 |
| 30864000 | 0000c621 |          |          |          |          |

>D03769

|          |          |          |          |          |          |
|----------|----------|----------|----------|----------|----------|
| 00010000 | 01005200 | 00100102 | 04010600 | 00080080 | 00000010 |
| 00000000 | 20000000 | 00000800 | 000808c0 | 08302000 | 4001b000 |
| 06008012 | 01202003 | 80180000 | 000c0008 | 10000000 | 02000000 |
| 00400000 | 00000201 | 00000100 | 38040e00 | 03000001 | 02500018 |
| 00000000 | 80000000 | 00000000 | 10000000 | 08000000 | 0006000b |
| 20004000 | 00402600 |          |          |          |          |

>D03767

|          |          |          |          |          |          |
|----------|----------|----------|----------|----------|----------|
| 00010002 | 01805b00 | 20122508 | 08110644 | 00080080 | 82002010 |
| 80000000 | 20000000 | 84400000 | 020a48c1 | 00600000 | 600db100 |
| 06019012 | 41040100 | 82080000 | 00080008 | 14001008 | 02000100 |
| 00404000 | 00420301 | c0000000 | 18060e00 | 03800300 | 0450001d |
| 00042200 | 80000000 | 00004000 | 10000000 | 00000000 | 00060021 |
| b0004002 | 03112220 |          |          |          |          |

>D03765

|          |          |          |          |          |          |
|----------|----------|----------|----------|----------|----------|
| 00010000 | c1005200 | 20100102 | 8c110740 | 000800c0 | 02002010 |
| 80000000 | 20000000 | 84080800 | 020e48c0 | 08302000 | 400db000 |
| 06418016 | 11242103 | 80181008 | 400c1008 | 14821000 | 02000000 |
| 00400000 | 00006301 | 40000120 | 38040e00 | 13000301 | 06504018 |
| 00000400 | 80000000 | 00004000 | 10000001 | 08000200 | 0006002b |
| 20004004 | 03432600 |          |          |          |          |

>D03763

|          |          |          |          |          |          |
|----------|----------|----------|----------|----------|----------|
| 00000000 | 01005100 | 00120000 | 00100444 | 00000080 | 00000000 |
| 00000000 | 20000000 | 00000000 | 000040c1 | 00200000 | 40053100 |
| 02018002 | 00040000 | 80080000 | 00080008 | 14000000 | 00000000 |
| 00000000 | 00400201 | 40000000 | 10040e00 | 02000200 | 00100018 |
| 00000200 | 00000000 | 00000000 | 10000000 | 00000000 | 01040021 |
| 20004002 | 01012200 |          |          |          |          |

>D03760

|          |          |          |          |          |          |
|----------|----------|----------|----------|----------|----------|
| 00014022 | 01005000 | 00101100 | 00010700 | 20080080 | 00002050 |
| 02002000 | 20100104 | 00000880 | 000a08c0 | 08380024 | 4001b000 |
| 06008032 | 01100000 | 800a0140 | 0008100a | 10868000 | 82000000 |
| 08400008 | 00000201 | 40100120 | 18208e00 | 23002040 | 81500019 |
| 00040c00 | 80000080 | 08000010 | 90001080 | 04088200 | 00060003 |
| 20005080 | 20002600 |          |          |          |          |

&gt;D03758

|          |          |          |          |          |          |
|----------|----------|----------|----------|----------|----------|
| 00014002 | 01004200 | 40101122 | 04010608 | 20080180 | 00002040 |
| 03000000 | 20100100 | 00100800 | 08080ac0 | 08382024 | 4001b000 |
| 0600800a | 00b02803 | 801a0040 | 080c000a | 10248000 | 02000000 |
| 08402008 | 80000201 | 44100100 | 38000e30 | 23002001 | 02d0001a |
| 00000000 | 80000080 | 48000010 | 10001080 | 08088000 | 0006000b |
| 20005080 | 20402600 |          |          |          |          |

&gt;D03756

|          |          |          |          |          |          |
|----------|----------|----------|----------|----------|----------|
| 00010000 | 01005200 | 00100102 | 84010700 | 00080080 | 00000010 |
| 00000000 | 20000000 | 00000800 | 000808c0 | 08302000 | 4001b000 |
| 0600801a | 01a02003 | 80181008 | 000c1008 | 10820000 | 02000000 |
| 02402000 | 00000201 | 00000120 | 38040e10 | 13000001 | 02500018 |
| 00000400 | 80000000 | 00000000 | 10000001 | 08000200 | 0006000b |
| 20024000 | 00422600 |          |          |          |          |

&gt;D03753

|          |          |          |          |          |          |
|----------|----------|----------|----------|----------|----------|
| 00010000 | 01005000 | 00100000 | 84010700 | 00080080 | 00000010 |
| 00000000 | 20000000 | 00000000 | 00000080 | 00202000 | 4001b000 |
| 0600801a | 01802003 | 80181008 | 00081008 | 10820000 | 00000000 |
| 02402000 | 00000201 | 00000020 | 30040e10 | 13000001 | 02100018 |
| 00000400 | 00000000 | 00000000 | 10000001 | 08000200 | 00040001 |
| 20024000 | 00002200 |          |          |          |          |

&gt;D03752

|          |          |          |          |          |          |
|----------|----------|----------|----------|----------|----------|
| 00018008 | 01805200 | 02100102 | 94010700 | 200800a0 | 00000000 |
| 01001000 | 22001004 | 00400880 | 000908d0 | 08302000 | 5001b000 |
| 060088c2 | 00202003 | 80181488 | 000c1008 | 10820200 | 02000020 |
| 00400008 | 00000201 | 80020120 | 38208e00 | 33004041 | 83400018 |
| 00000c00 | c0000001 | 08004000 | 90000001 | 0c000300 | 0086000b |
| 20044000 | 00402600 |          |          |          |          |

&gt;D03751

|          |          |          |          |          |          |
|----------|----------|----------|----------|----------|----------|
| 000040a2 | 01004000 | 001a0102 | 62014602 | 20040200 | 00100110 |
| 00002000 | 22001400 | 05060900 | 000808c0 | 08388024 | 50019820 |
| 01009802 | 00701040 | 40020540 | 208c000c | 01040200 | 86030006 |
| 0c212010 | 00800201 | 40902102 | 18218e18 | 20c02000 | 81580091 |
| 00041210 | c0011200 | 004000b0 | 98001081 | 04608106 | 01068203 |
| 24042000 | e0000610 |          |          |          |          |

&gt;D03743

|          |          |          |          |          |          |
|----------|----------|----------|----------|----------|----------|
| 00010010 | 01007200 | 20100100 | 8c310f40 | 00080080 | 00000000 |
| 00000004 | 2000200c | 00000800 | 020e48c0 | 08300000 | 4001f000 |

|          |          |          |          |          |          |
|----------|----------|----------|----------|----------|----------|
| 0e01b00a | 008c2101 | 80181008 | 000c1108 | 34a20018 | 02000001 |
| 02c02058 | 00400301 | 40000120 | 38350e10 | 17000283 | 8f500018 |
| 00011e01 | 80000000 | 00804000 | 10000020 | 0c000200 | 0006002b |
| 20024000 | 03012600 |          |          |          |          |

&gt;D03741

|          |          |          |          |          |          |
|----------|----------|----------|----------|----------|----------|
| 04050002 | 01c07200 | 00104100 | 15810e10 | 041c02e0 | 00118010 |
| 00002020 | 2200300d | 00c00b80 | 00090ac0 | 28318004 | 5001b800 |
| 0e00881a | 00102801 | 811a0400 | 021e010c | 10020000 | 0e080002 |
| 00602818 | 40000a01 | e0000d00 | 38278e70 | 23800003 | 93500018 |
| 00141800 | c0000202 | 00000040 | 90200120 | 0c000304 | 0046000b |
| e0064000 | 20006e00 |          |          |          |          |

&gt;D03738

|          |          |          |          |          |          |
|----------|----------|----------|----------|----------|----------|
| 04000002 | 01007608 | 20100108 | 05810610 | 040812c0 | 00000000 |
| 02042020 | 2000000c | 00400980 | 00090bc0 | 28308000 | 5001b800 |
| 0e008002 | 00902801 | 811a0001 | 000c000c | 10000000 | 0e000000 |
| 02c02018 | 40020201 | 20000d00 | 38340610 | 27000083 | 93500018 |
| 00041801 | 80000200 | 00120000 | 10000100 | 0c000204 | 0046001b |
| 60024000 | 20002600 |          |          |          |          |

&gt;D03736

|          |          |          |          |          |          |
|----------|----------|----------|----------|----------|----------|
| 04002007 | 00000a08 | 20000108 | 80058e42 | 05085080 | 00004002 |
| 02800000 | 00003209 | 00400104 | 500d08d0 | 09388004 | 40008010 |
| 80808a22 | 08300000 | 01211049 | 001c610c | 10040000 | 0a800000 |
| 88400000 | 00220040 | 44000180 | 18058428 | 33826800 | 83410030 |
| 00342400 | c0000000 | 20170000 | 110008c1 | 0400831c | 0046010b |
| 40060000 | 800046e0 |          |          |          |          |

&gt;D03735

|          |          |          |          |          |          |
|----------|----------|----------|----------|----------|----------|
| 00008006 | 01001001 | 00100b20 | 02110e10 | 01000040 | 00000018 |
| 00000104 | 30082001 | 04424100 | 000148c2 | 00288084 | c0038800 |
| 02019003 | 00341000 | 20021040 | 800c0004 | 040e0400 | 02412000 |
| 0c002020 | 42200201 | 40280100 | 18050410 | 21022100 | 00780018 |
| 00150001 | 91080000 | 00000208 | 100000c1 | 0001c004 | 00468001 |
| 400a0800 | 01016240 |          |          |          |          |

&gt;D03734

|          |          |          |          |          |          |
|----------|----------|----------|----------|----------|----------|
| 00400006 | 01000008 | 20100100 | 00810e00 | 00150241 | 00b00000 |
| 02800a24 | 22003601 | 01600d00 | 010908f0 | 0b380004 | 40419800 |
| 98009822 | 08000000 | 00000440 | 00282048 | 00064001 | 02400000 |
| 49032210 | 00020201 | 440001a0 | 18118e10 | 21020000 | 00500010 |
| 84152400 | c0000000 | 00040000 | b4840580 | 00408300 | 20060002 |
| 240c0000 | 80004610 |          |          |          |          |

&gt;D03733

|          |          |          |          |          |          |
|----------|----------|----------|----------|----------|----------|
| 00000000 | 01000000 | 00100102 | 02010600 | 00000000 | 00000010 |
| 00000000 | 00000400 | 00100800 | 001808c2 | 08100000 | 40018000 |
| 00000000 | 00201000 | 00000000 | 00000000 | 06000000 | 02000180 |
| 00000000 | 04100001 | 00000100 | 18000000 | 00000000 | 20400110 |
| 00000000 | 80000000 | 00000000 | 80000001 | 00000000 | 00068402 |
| 04000000 | 00030600 |          |          |          |          |

&gt;D03731

|          |          |          |          |          |          |
|----------|----------|----------|----------|----------|----------|
| 00000000 | 00000000 | 00100100 | 00010600 | 00402000 | 00000000 |
| 00000000 | 00100000 | 00000880 | 00080840 | 08300000 | 40008000 |
| 00000002 | 00000000 | 00100000 | 00000000 | 00000000 | 02000000 |
| 00000000 | 00000201 | 00000100 | 18200000 | 00010000 | 81400010 |
| 00000000 | 80000000 | 00000000 | 00000000 | 04000000 | 00060002 |
| 00000020 | 00000600 |          |          |          |          |

&gt;D03728

|          |          |          |          |          |          |
|----------|----------|----------|----------|----------|----------|
| 00020090 | 01805400 | 01100000 | 01b00e00 | 00088080 | 00000000 |
| 00020000 | 20002000 | 00200200 | 004009e2 | 00202010 | 7003b000 |
| 0e009002 | 01000001 | 80b80000 | 00188008 | 10006004 | 00000000 |
| 00600000 | 00007603 | 80040000 | 380d0e29 | 02000001 | 3a500038 |
| 02000000 | 0000000c | 40000000 | 1000000c | 08000412 | 20060011 |
| a0184002 | 00812260 |          |          |          |          |

&gt;D03722

|          |          |          |          |          |          |
|----------|----------|----------|----------|----------|----------|
| 00010000 | 01003200 | 00100100 | 04410e00 | 00000000 | 00000010 |
| 00000000 | 20002808 | 00200a00 | 000808c2 | 08302000 | 4003b000 |
| 06009012 | 00002003 | 80000000 | 00140000 | 00000000 | 02000000 |
| 00000008 | 00000201 | 00000100 | 38250620 | 00000003 | 83500018 |
| 00000800 | 80000000 | 40000000 | 10000000 | 0c000010 | 0006000b |
| a0084000 | 00012620 |          |          |          |          |

&gt;D03720

|          |          |          |          |          |          |
|----------|----------|----------|----------|----------|----------|
| 0800a002 | 0000c800 | 00004100 | 00810610 | 04040040 | 00082060 |
| 04006000 | 05001001 | 06400100 | 400808e0 | 6c01800c | 60018800 |
| 82009864 | 00700000 | 80120440 | 000c0204 | 00070000 | 02800005 |
| 84600000 | 50002000 | c0000000 | 18038518 | 31800000 | 80700418 |
| 00042000 | e0000600 | 00040020 | 40000050 | 00404084 | 00460042 |
| 40040004 | a0020420 |          |          |          |          |

&gt;D03717

|          |          |          |          |          |          |
|----------|----------|----------|----------|----------|----------|
| 00002010 | 00801001 | 051a0100 | 23b10619 | 000a0009 | 00100088 |
| 00001000 | 20001004 | 02020100 | 00402a40 | 00002080 | 60409080 |

|          |          |          |          |          |          |
|----------|----------|----------|----------|----------|----------|
| 00008000 | 00201041 | a0200020 | 8044008e | 02022200 | 02001400 |
| 04400000 | 00106400 | 80802000 | 18000600 | 10800208 | 1c480098 |
| 02000001 | 80000004 | 00000020 | 0840006d | 08004404 | 22060000 |
| 00000000 | 40010a60 |          |          |          |          |

&gt;D03716

|          |          |          |          |          |          |
|----------|----------|----------|----------|----------|----------|
| 00002010 | 00801001 | 051a0100 | 23b10619 | 000a0009 | 00100088 |
| 00001000 | 20001004 | 02020100 | 00402a40 | 00002080 | 60409080 |
| 00008000 | 00201041 | a0200020 | 8044008e | 02022200 | 02001400 |
| 04400000 | 00106400 | 80802000 | 18000600 | 10800208 | 1c480098 |
| 02000001 | 80000004 | 00000020 | 0840006d | 08004404 | 22060000 |
| 00000000 | 40010260 |          |          |          |          |

&gt;D03714

|          |          |          |          |          |          |
|----------|----------|----------|----------|----------|----------|
| 00008002 | 00000804 | 00100304 | 02010200 | 00000041 | 00000010 |
| 20000010 | 08000040 | 00002000 | 00080841 | 08210004 | 40009800 |
| 03008004 | 00009004 | 40060040 | 000c0008 | 08048400 | 02000000 |
| 08000002 | 00000000 | 40000400 | 48000b00 | 21000000 | 00400010 |
| 00002000 | 80000600 | 02000008 | 00005085 | 00008008 | 00269002 |
| 00002000 | 20020600 |          |          |          |          |

&gt;D03712

|          |          |          |          |          |          |
|----------|----------|----------|----------|----------|----------|
| 00000000 | 00801200 | 00020100 | 10910301 | 00400041 | 00000000 |
| 82000080 | 00005440 | 01802800 | 00180840 | c810a100 | 6000c000 |
| 84008000 | 01010001 | 823c0003 | 09089008 | 0c020414 | 82000000 |
| 6441c018 | 00002001 | 80010120 | 09040a80 | 05808000 | 0840001d |
| 00001400 | 80000400 | 20402000 | 40000420 | 00404240 | 20020002 |
| 0400a000 | 00810430 |          |          |          |          |

&gt;D03710

|          |          |          |          |          |          |
|----------|----------|----------|----------|----------|----------|
| 0002a002 | 00811201 | 00024100 | 10910210 | 00041020 | 04000008 |
| 01000001 | 00480004 | 00000100 | 10000850 | 0000a084 | 60008810 |
| 06004808 | 00210000 | a0220000 | 820c0004 | 04020000 | 02003004 |
| 04200008 | 10402006 | c0000000 | 08008100 | 31800000 | 08400009 |
| 00040803 | 80080200 | 08040240 | 00000060 | 0040c004 | 00020400 |
| 00000820 | 01030020 |          |          |          |          |

&gt;D03689

|          |          |          |          |          |          |
|----------|----------|----------|----------|----------|----------|
| 00006036 | 00802208 | a1100108 | 02b10600 | 01081010 | 00004012 |
| 02440400 | 00001400 | 06000104 | 000128f0 | 09002004 | 7000800a |
| 00018832 | 02001201 | 81200041 | 000c200c | 00020800 | 02801000 |
| 04400000 | 00222008 | c0100000 | 3801a020 | 30800800 | 8b404008 |
| 00000000 | c0000040 | 30c24000 | 90000869 | 04004304 | 20468008 |
| 40260200 | 800126a2 |          |          |          |          |

&gt;D03670

|          |          |          |          |          |          |
|----------|----------|----------|----------|----------|----------|
| 00020000 | 01001010 | 40100000 | 00000400 | 00000000 | 00000000 |
| 0c000000 | 20000000 | 00200000 | 00000080 | 00200000 | 40031000 |
| 04008006 | 00000000 | 00000000 | 00000010 | 00000000 | 00000000 |
| 00000000 | 00040201 | 00000000 | 10040620 | 00000000 | 00100018 |
| 00000000 | 00000000 | 00000000 | 10000000 | 00000002 | 00040005 |
| 00000000 | 02802200 |          |          |          |          |

&gt;D03643

|          |          |          |          |          |          |
|----------|----------|----------|----------|----------|----------|
| 00050000 | 81040020 | 00100302 | 02010300 | c0180041 | 00000811 |
| 82000080 | 08000402 | 00004800 | 01180840 | 48100000 | 40009000 |
| 14028028 | 00a21004 | 00080402 | 0008100c | 00020600 | 020000a0 |
| 23402090 | 00102001 | 00000130 | 08000a00 | 01408020 | 00400012 |
| 01201400 | 80000400 | 00406000 | c0000001 | 00404242 | 0822800a |
| 24020000 | 01800610 |          |          |          |          |

&gt;D03601

|          |          |          |          |          |          |
|----------|----------|----------|----------|----------|----------|
| 00030040 | 01005000 | 00100100 | 80010700 | 00080080 | 00000010 |
| 00000000 | 00000000 | 00000000 | 00020080 | 00200000 | 4001b000 |
| 06008032 | 01800000 | 80081008 | 00081008 | 10820000 | 00000000 |
| 02402000 | 00000201 | 00000020 | 10000e00 | 13000000 | 00000018 |
| 10000400 | 00000000 | 00800000 | 00000001 | 00000200 | 00040003 |
| 20024000 | 00000200 |          |          |          |          |

&gt;D03440

|          |          |          |          |          |          |
|----------|----------|----------|----------|----------|----------|
| 00010000 | 0100520a | 4010050a | 00050600 | 00080084 | 00000010 |
| 00004000 | 20000000 | 00000810 | 000808c0 | 08300000 | 4001f000 |
| 0680801a | 812200b2 | 822a0000 | 00082608 | 100e00a8 | 02100000 |
| 00406000 | 00003203 | 01000100 | 1d140e10 | 23400000 | 00500018 |
| 00000008 | 80000100 | 02000000 | 10014000 | 00040000 | 01060287 |
| 30404000 | 0000a601 |          |          |          |          |

&gt;D03433

|          |          |          |          |          |          |
|----------|----------|----------|----------|----------|----------|
| 00000040 | 01000000 | 00100700 | 80010700 | 003800c0 | 00000010 |
| 00000000 | 20000000 | 00000000 | 01000080 | 00200000 | 50019000 |
| 04008002 | 03800000 | 00281008 | 00089008 | 10860000 | 00000000 |
| 01c02000 | 00000201 | 00000020 | 10000a10 | 17000080 | 08100010 |
| 10000401 | 00000000 | 00000200 | 10000021 | 00000200 | 0004000a |
| 00020000 | 00022a00 |          |          |          |          |

&gt;D03350

|          |          |          |          |          |          |
|----------|----------|----------|----------|----------|----------|
| 0400c202 | 00801008 | 20100108 | 8a090600 | 81041080 | 02004010 |
| 0e008010 | 00000c08 | 01012100 | 00000840 | 013c0004 | 60009800 |

|          |          |          |          |          |          |
|----------|----------|----------|----------|----------|----------|
| 06808006 | 00511001 | 01081049 | 000c650c | 10240000 | 10004108 |
| 08e0000a | 10264604 | 40100000 | 18041f28 | 33c060c0 | 00008010 |
| 00002401 | 00001000 | 22000040 | 00400081 | 00008208 | 00468001 |
| 44000000 | 002202c0 |          |          |          |          |

&gt;D03218

|          |          |          |          |          |          |
|----------|----------|----------|----------|----------|----------|
| 00000002 | 01800a08 | 20024100 | 10111e00 | 01240020 | 002c0022 |
| c2020080 | 0a005408 | 00000200 | 00000840 | 00200104 | 60008000 |
| 10028802 | 00400000 | 90020082 | 0204200c | 04241408 | 02000004 |
| 10620400 | 00220000 | d0000000 | 1e028608 | 20800801 | 0061001d |
| 00102000 | 92000001 | 00422040 | c0000200 | 00c10304 | 00060001 |
| 84040000 | 00114220 |          |          |          |          |

&gt;D03115

|          |          |          |          |          |          |
|----------|----------|----------|----------|----------|----------|
| 00000092 | 00800400 | 01104000 | 05b00600 | 000c0000 | 00000000 |
| 00020000 | 00000000 | 00000000 | 00400960 | 00202004 | 60008000 |
| 00000802 | 00402001 | 80e00040 | 00048004 | 00002000 | 00000000 |
| 00600000 | 00007e03 | c8000000 | 38008008 | 20800001 | ba400038 |
| 02000000 | 0000010c | 00000000 | 0000000c | 08000400 | 20060010 |
| 00040002 | 00030260 |          |          |          |          |

&gt;D03077

|          |          |          |          |          |          |
|----------|----------|----------|----------|----------|----------|
| 00014002 | 01004200 | 40101122 | 04010608 | 20080180 | 00002040 |
| 03000000 | 20100100 | 00100800 | 08080ac0 | 08382024 | 4001b000 |
| 06008002 | 00302803 | 801a0040 | 080c000a | 10248000 | 02000000 |
| 08400008 | 80000201 | 44100100 | 38000e10 | 23002001 | 02d0001a |
| 00000000 | 80000080 | 48000010 | 10001080 | 08088000 | 0006000b |
| 20005080 | 20402600 |          |          |          |          |

&gt;D03034

|          |          |          |          |          |          |
|----------|----------|----------|----------|----------|----------|
| 00010000 | 01000000 | 00000000 | 00000000 | 00080000 | 00000000 |
| 00000000 | 00000000 | 00000000 | 00000000 | 00000000 | 40001000 |
| 04008008 | 00800000 | 00000000 | 00080008 | 00000000 | 00000000 |
| 00402000 | 00000001 | 00000000 | 00000a00 | 01000000 | 00000010 |
| 00000000 | 00000000 | 00000000 | 00000000 | 00000000 | 00000000 |
| 00020000 | 00000000 |          |          |          |          |

&gt;D03012

|          |          |          |          |          |          |
|----------|----------|----------|----------|----------|----------|
| 00000040 | 44020008 | 20400300 | 01610600 | 20000021 | 04000000 |
| 82010001 | 00001601 | 00004100 | 00980840 | 08002200 | 40849800 |
| 01008003 | 08200003 | 40000000 | 2008a008 | 08000000 | 02002004 |
| 00a00000 | 00024000 | 00000000 | 1a000600 | 00004000 | 91408011 |
| 00000000 | 80000100 | 00010200 | 80800004 | 04002000 | 00060402 |
| 04002002 | 00010660 |          |          |          |          |

## &gt;D02835

|          |          |          |          |          |          |
|----------|----------|----------|----------|----------|----------|
| 00000002 | 00000000 | 00004000 | 02000600 | 00040000 | 00002060 |
| 00000000 | 00000000 | 06000002 | 400008e0 | 04000004 | 4001a000 |
| 00008800 | 00600000 | 00100040 | 040c400c | 00000000 | 40000000 |
| 00200000 | 00000000 | 40000000 | 18008a18 | 22800000 | 84300002 |
| 00000000 | 40000000 | 00000000 | 00000010 | 00000000 | 00060000 |
| 00040000 | 00000800 |          |          |          |          |

## &gt;D02769

|          |          |          |          |          |          |
|----------|----------|----------|----------|----------|----------|
| 0000000a | 01c01800 | 80080510 | 89090e20 | 003800e4 | 0000c000 |
| 0000cc00 | 00000800 | 00404100 | 018000b0 | 0c00800c | 40019004 |
| 00001000 | 038a0120 | 00081080 | 101eca0c | 002a0020 | 00000000 |
| 19c00000 | 80205003 | 80080020 | 14000850 | 27800040 | 0c000014 |
| 10000400 | 40000002 | 0e000200 | 10010070 | 00000208 | 00460014 |
| c1680000 | 000080c0 |          |          |          |          |

## &gt;D02756

|          |          |          |          |          |          |
|----------|----------|----------|----------|----------|----------|
| 00050040 | 63000808 | 21500502 | c0850700 | 882800d1 | 4002c402 |
| 12103c40 | 09000a41 | 00202900 | 01081ae0 | 2c300000 | 4000da40 |
| 1500802a | 02a90000 | 40041028 | 2a28b008 | 08a20a40 | 82001100 |
| 17d0a000 | 40020201 | 00101520 | b8020a60 | 170840e8 | 08420414 |
| 10800400 | e0002301 | 00080000 | 74814024 | 02000283 | 00074802 |
| c2e02004 | 02000600 |          |          |          |          |

## &gt;D02731

|          |          |          |          |          |          |
|----------|----------|----------|----------|----------|----------|
| 0481009a | 40804808 | e1101588 | 1db50610 | 01085160 | 0001c006 |
| 02c39800 | 01280b00 | 16400100 | 11060871 | 8020a004 | 62808840 |
| 0080c082 | 0050a001 | 81220881 | 000ca10c | 0000a820 | 0780a000 |
| 00600808 | 40666001 | 80000102 | 28402040 | a5800864 | 2a704178 |
| 02040402 | 80200004 | 30800820 | 100418ac | 0800870c | 20c61c00 |
| 43000a82 | 602706e2 |          |          |          |          |

## &gt;D02729

|          |          |          |          |          |          |
|----------|----------|----------|----------|----------|----------|
| 04002000 | 44800808 | 20000109 | 00010602 | 00001080 | 00000000 |
| 02040000 | 02001000 | 00000000 | 00000840 | 00200000 | 40008000 |
| 0080c802 | 00000000 | 01005401 | 20088008 | 00002000 | 02000000 |
| 00080000 | 00020200 | 80000000 | 08068600 | 12000000 | 0044800c |
| 00000000 | c0000000 | 00220000 | 80000000 | 00000300 | 00060009 |
| 80040000 | 00020200 |          |          |          |          |

## &gt;D02709

|          |          |          |          |          |          |
|----------|----------|----------|----------|----------|----------|
| 00002010 | 00801001 | 051a0100 | 22b10219 | 00020009 | 00100088 |
| 00001000 | 20000004 | 02020100 | 00002a40 | 00002080 | 60408080 |



|          |          |          |          |          |          |
|----------|----------|----------|----------|----------|----------|
| 00008000 | 00201041 | a0200020 | 8044008e | 00020200 | 02001400 |
| 04000000 | 00102000 | 80802000 | 08000000 | 10800208 | 0c480088 |
| 00000001 | 80000000 | 00000020 | 08400069 | 08004004 | 22020000 |
| 00000000 | 40010020 |          |          |          |          |

&gt;D06238

|          |          |          |          |          |          |
|----------|----------|----------|----------|----------|----------|
| 00004003 | 80008808 | 20000108 | 980d0600 | 0204100c | 00004000 |
| 4200a000 | 02001808 | 00000100 | 00000840 | 01200004 | 4000d000 |
| 00004822 | 08600000 | 01000041 | 000c800c | 00040080 | 02000004 |
| 08600000 | 00222c00 | 40120000 | 0c008028 | 20810840 | 00600000 |
| 00040000 | 80000000 | 00040040 | 80000080 | 00408308 | 00460008 |
| 40040020 | 000202e0 |          |          |          |          |

&gt;D05458

|          |          |          |          |          |          |
|----------|----------|----------|----------|----------|----------|
| 00000000 | 00000000 | 00000100 | 00010600 | 00000000 | 00000000 |
| 00000000 | 00000000 | 00000800 | 00080840 | 08100000 | 40008000 |
| 00000000 | 00000000 | 00000000 | 00000000 | 00000000 | 02000000 |
| 00000000 | 00000001 | 00000100 | 18000000 | 00000000 | 81400010 |
| 00000000 | 80000000 | 00000000 | 00000000 | 04000000 | 00060002 |
| 00000000 | 00000400 |          |          |          |          |

&gt;D05407

|          |          |          |          |          |          |
|----------|----------|----------|----------|----------|----------|
| 0000000a | 00801800 | 00080000 | 00000600 | 00180040 | 0000c040 |
| 0000b004 | 00000800 | 06400100 | 800000e0 | 0000800c | 40011000 |
| 00009000 | 00c00000 | 00080080 | 100c000c | 00000000 | 00008000 |
| 09400000 | 00200001 | 80000100 | 1c000050 | 21800840 | 00700014 |
| 00000000 | 80200000 | 60000000 | 00040000 | 00004008 | 00461000 |
| c0080000 | 80000280 |          |          |          |          |

&gt;D05341

|          |          |          |          |          |          |
|----------|----------|----------|----------|----------|----------|
| 00010000 | 01000000 | 00000000 | 00000000 | 00080000 | 00000000 |
| 00000000 | 00000000 | 00000000 | 00000000 | 00000000 | 40001000 |
| 04008008 | 00800000 | 00000000 | 00080008 | 00000000 | 00000000 |
| 00402000 | 00000001 | 00000000 | 00000a00 | 01000000 | 00000010 |
| 00000000 | 00000000 | 00000000 | 00000000 | 00000000 | 00000000 |
| 00020000 | 00000000 |          |          |          |          |

&gt;D04983

|          |          |          |          |          |          |
|----------|----------|----------|----------|----------|----------|
| 00000000 | 00000000 | 00000000 | 00100440 | 00000000 | 02002000 |
| 00000000 | 00000000 | 84000000 | 00004000 | 00000000 | 40083000 |
| 04018000 | 00040000 | 00000000 | 00080008 | 04000000 | 00000000 |
| 00400000 | 00000001 | 00000000 | 10000a00 | 03000300 | 00000010 |
| 00000000 | 00000000 | 00000000 | 00000000 | 00000000 | 00040000 |
| 00000000 | 01010000 |          |          |          |          |

## &gt;D04966

|          |          |          |          |          |          |
|----------|----------|----------|----------|----------|----------|
| 00000000 | 00000000 | 00000000 | 00000800 | 00000000 | 00000000 |
| 00000000 | 00002000 | 00000000 | 00000002 | 00200000 | 00000002 |
| 00000000 | 00000000 | 00000000 | 00200000 | 00000000 | 00000000 |
| 00000000 | 00000000 | 00000100 | 00020000 | 00000000 | 00000000 |
| 00000000 | 00000000 | 40000000 | 20000000 | 00000010 | 00040000 |
| 00000001 | 00000000 |          |          |          |          |

## &gt;D04292

|          |          |          |          |          |          |
|----------|----------|----------|----------|----------|----------|
| 04001008 | c7000628 | 6010090a | 90210702 | 00181041 | c2802000 |
| 12040001 | 2a001642 | 90044880 | 019818c8 | 08300308 | 40018040 |
| 00824882 | 20a10884 | 110e0425 | 120ca018 | 08004000 | 26108020 |
| 0f682410 | 8002aa01 | 04020100 | 18018010 | 0100e000 | 02d48410 |
| 00201480 | c0004409 | 00624200 | 90000000 | 04000302 | 0086c80a |
| 64060000 | 00002e40 |          |          |          |          |

## &gt;D04197

|          |          |          |          |          |          |
|----------|----------|----------|----------|----------|----------|
| 00000002 | 01400000 | 00140000 | 86010600 | 00180060 | 000041e0 |
| 00000400 | 00000000 | 06000100 | 818000b0 | 0c00000c | 40018000 |
| 00009000 | 03c81110 | 00aa1080 | 001c800c | 00200000 | 1000c000 |
| 09c00000 | 00001001 | 80080020 | 10000010 | 25800041 | 08300010 |
| 10040400 | c0000002 | 20000200 | 10040862 | 00004200 | 01470000 |
| 40281000 | 00000280 |          |          |          |          |

## &gt;D04031

|          |          |          |          |          |          |
|----------|----------|----------|----------|----------|----------|
| 00006022 | 03008a19 | 81504100 | 50250710 | 800c547a | 0200c440 |
| 0000c800 | 00181040 | 9e500900 | 700808f0 | 0d118004 | 4045d810 |
| 8d0189a2 | 00618200 | e01a0140 | 0a0d301c | 08020060 | 9688f004 |
| 246b8002 | 50600001 | 41130629 | 98188a58 | 3d805008 | 89700494 |
| 0004a402 | c038ab81 | 08088260 | 90047075 | 0643420d | 0a060e4a |
| c0443800 | c6000060 |          |          |          |          |

## &gt;D04029

|          |          |          |          |          |          |
|----------|----------|----------|----------|----------|----------|
| 000040a6 | 00a29208 | 201a0b00 | 52080e00 | 010c0240 | 00104012 |
| 10048400 | 0000140d | 04066904 | 000158f0 | 0939806c | 6010c002 |
| 0000ba01 | 02501240 | 00060040 | 080c210c | 09040408 | 02c00008 |
| 08600000 | 0022000c | c0902001 | 1805a668 | 21c12840 | 8308008c |
| 00104010 | c0012041 | 28228030 | 98010881 | 0400c10c | 01468b0b |
| c4268008 | c01227b0 |          |          |          |          |

## &gt;D04028

|          |          |          |          |          |          |
|----------|----------|----------|----------|----------|----------|
| 00010040 | 01005000 | 00100100 | 80010700 | 000800c0 | 00000000 |
| 00000000 | 00000000 | 00000000 | 01000080 | 00200000 | 4000b000 |

|          |          |          |          |          |          |
|----------|----------|----------|----------|----------|----------|
| 14008028 | 02800000 | 00001008 | 00081008 | 10820000 | 00000000 |
| 01402000 | 00000001 | 00000020 | 10040e00 | 13000000 | 00000018 |
| 10000400 | 00000000 | 00800000 | 10000000 | 00000200 | 0004000b |
| 20024000 | 00000200 |          |          |          |          |

&gt;D04025

|          |          |          |          |          |          |
|----------|----------|----------|----------|----------|----------|
| 14040002 | 81000038 | 601a010a | 10010e00 | 00081001 | 04000040 |
| a6040484 | 08000420 | 00904b00 | 180a08d0 | 08180101 | 40098800 |
| 02800406 | 01a10000 | 81020023 | 400c000c | 04008404 | 02080000 |
| 00404000 | 40060001 | 05020100 | 18000018 | a1015000 | 04511110 |
| 00200000 | 82004001 | 04522110 | d8001240 | 00420224 | 00060002 |
| 04144080 | 04008600 |          |          |          |          |

&gt;D04024

|          |          |          |          |          |          |
|----------|----------|----------|----------|----------|----------|
| 0441a082 | 04e01808 | 20180108 | 0ad90600 | 04041080 | 00004010 |
| 0a008010 | 02a41a08 | 00026100 | 0a086840 | 01302034 | 70109800 |
| c6800c26 | 0045900b | 81200661 | 020c000c | 04064000 | 12014c04 |
| 0c60020a | 1022e002 | c0640000 | 08069928 | 30804040 | 0cc81008 |
| 00802020 | c000a802 | 06144010 | c80000f1 | 0240c308 | 0046c000 |
| 42000040 | 020302e0 |          |          |          |          |

&gt;D03899

|          |          |          |          |          |          |
|----------|----------|----------|----------|----------|----------|
| 00050040 | 6b000808 | 2000050a | 40050700 | 88281051 | 4002c402 |
| 17103c40 | 09000a01 | 00200900 | 01080ae8 | 2c100000 | 4000db40 |
| 04008002 | 22a90000 | 01044021 | 2a28b008 | 08a00a00 | 02001100 |
| 13d8a008 | 40020201 | 00101520 | b8020260 | 07084068 | 0a420414 |
| 00800c00 | e0002201 | 00080800 | 64800024 | 02000383 | 00074802 |
| c2e00004 | 02400400 |          |          |          |          |

&gt;D03882

|          |          |          |          |          |          |
|----------|----------|----------|----------|----------|----------|
| 00010202 | 81000020 | 00000000 | 00480000 | 40402000 | 04000000 |
| 00200080 | 02000402 | 01000000 | 00100000 | 00100080 | 40001008 |
| 04028008 | 00000000 | 00000410 | 40090008 | 00000000 | 00000020 |
| 02212000 | 00020001 | 00000009 | 00000280 | 00008802 | 00000810 |
| 00200000 | 00000000 | 00404000 | 80000000 | 00000000 | 01000200 |
| 24020804 | 00000000 |          |          |          |          |

&gt;D03829

|          |          |          |          |          |          |
|----------|----------|----------|----------|----------|----------|
| 00030000 | 01001400 | 00100000 | 00000c00 | 00180000 | 00000000 |
| 00000000 | 20002000 | 00000200 | 000001a2 | 00200000 | 40011000 |
| 1400901a | 01800000 | 00000000 | 00180008 | 00000000 | 00000000 |
| 01c02000 | 00000201 | 00000000 | 101d2e10 | 01000080 | 00100018 |
| 00000003 | 00000000 | 40000000 | 10000000 | 00000010 | 01040011 |
| 801a0000 | 00800a00 |          |          |          |          |

&gt;D03828

|          |          |          |          |          |          |
|----------|----------|----------|----------|----------|----------|
| 0003800a | 01805800 | 00180100 | 48850610 | 00181484 | 00004000 |
| 00003000 | 22001800 | 06400900 | 800a08e0 | 28300004 | 4000b800 |
| 8e008822 | 02600800 | 00000400 | 000c000c | 10000000 | 0200c000 |
| 00600400 | 40200201 | 40000100 | 1c168e60 | 23800840 | 0870001c |
| 02042000 | c0000000 | 68000020 | 90040000 | 00004108 | 02460003 |
| e0044200 | 80800fa0 |          |          |          |          |

&gt;D03826

|          |          |          |          |          |          |
|----------|----------|----------|----------|----------|----------|
| 00004026 | 42000208 | 60100108 | 00410e00 | 20001000 | c0002012 |
| 02002004 | 00002809 | 04200a80 | 000808c0 | 08302004 | 40028000 |
| 00009222 | 20000002 | 01030141 | 00140008 | 00068000 | 82400020 |
| 08080018 | 00020241 | 40100100 | 18218c10 | 30020000 | 81402011 |
| 00151000 | 80010002 | 00040000 | 90001080 | 04008200 | 0006080b |
| 00080080 | 30014620 |          |          |          |          |

&gt;D03823

|          |          |          |          |          |          |
|----------|----------|----------|----------|----------|----------|
| 0000402e | 42801a08 | 62100108 | 90010e00 | 20001020 | c000a012 |
| 02002004 | 0200300d | 04600a80 | 000808d0 | 08300004 | 50038000 |
| 00009ae2 | 20200000 | 010305c1 | 08160008 | 00068200 | 82480020 |
| 08080018 | 00020241 | c0120100 | 18218c10 | 30024000 | 8140201d |
| 00151000 | c0010022 | 08040000 | 90001080 | 04008300 | 0006080b |
| a00c0080 | 30004600 |          |          |          |          |

&gt;D03822

|          |          |          |          |          |          |
|----------|----------|----------|----------|----------|----------|
| 00000000 | 46000008 | 60000108 | 00010600 | 00001000 | 00000000 |
| 02000000 | 02001000 | 04000200 | 00080840 | 08200000 | 40008000 |
| 00008a02 | 20000000 | 01010001 | 00120008 | 00020000 | 02000000 |
| 00080000 | 00020200 | 00000000 | 08008c10 | 10000000 | 0044a018 |
| 00000000 | 80010022 | 00000000 | 80000000 | 00000300 | 00060003 |
| 80040000 | 1000060  |          |          |          |          |

&gt;D03816

|          |          |          |          |          |          |
|----------|----------|----------|----------|----------|----------|
| 00010040 | 81040020 | 00000900 | 80010300 | 40080000 | 00000001 |
| 00000000 | 00000402 | 00004000 | 00100008 | 00000200 | 40009000 |
| 14028028 | 02800004 | 00000404 | 0008100c | 00820000 | 00000020 |
| 03402080 | 0000a001 | 00000020 | 00001a00 | 0100a000 | 00000012 |
| 00200400 | 00000000 | 00406200 | 80000000 | 00000200 | 00000002 |
| 24020000 | 00100000 |          |          |          |          |

&gt;D03807

|          |          |          |          |          |          |
|----------|----------|----------|----------|----------|----------|
| 0001c002 | 00808a00 | 80100100 | 02010700 | 001c0000 | 00006070 |
| 00000000 | 00001002 | 06100102 | c00028e0 | 0d00000c | 4001a800 |

|          |          |          |          |          |          |
|----------|----------|----------|----------|----------|----------|
| 0201981c | 00e01000 | 003200c0 | 0c0cd00c | 02800200 | 4200c800 |
| 00600000 | 00000000 | c0000000 | 18008b38 | 23802041 | 85700006 |
| 00046000 | c0000000 | 20120000 | 00040031 | 04004000 | 00468008 |
| 400c0008 | 0a420280 |          |          |          |          |

&gt;D03806

|          |          |          |          |          |          |
|----------|----------|----------|----------|----------|----------|
| 00004004 | 0000c608 | 20102100 | 02010700 | 010c00c0 | 80000032 |
| 02008000 | 00001202 | 06100000 | c00c68c0 | 0800800c | 60019000 |
| 01009812 | 00e01000 | 40040000 | 000d200c | 0a200208 | 02004804 |
| 00200000 | 00220240 | 00000000 | 1c018a18 | 01806801 | 83700010 |
| 04104000 | c0000101 | 10128000 | 00040001 | 05000104 | 0006804a |
| 00046008 | 08004600 |          |          |          |          |

&gt;D03805

|          |          |          |          |          |          |
|----------|----------|----------|----------|----------|----------|
| 00024088 | 00809e00 | 02900100 | 12010600 | 20000020 | 00008010 |
| 01000000 | 22001006 | 00600980 | 000829f0 | 08300004 | 50039000 |
| 0d0088d2 | 00201000 | 40200480 | 02040000 | 02002210 | 02000921 |
| 00000018 | 00100201 | 80c20100 | 182e8640 | 20004000 | a140001c |
| 00001804 | c0000101 | 88124000 | 90000001 | 04300102 | 0186801b |
| a0042008 | 08800600 |          |          |          |          |

&gt;D03803

|          |          |          |          |          |          |
|----------|----------|----------|----------|----------|----------|
| 0003040a | 10000800 | 0010010a | 56010618 | 000c5020 | 00088010 |
| 00002080 | 0001f00b | 00400044 | 004918c0 | 08008a04 | d081a000 |
| 00008870 | 04401008 | 000220c0 | 060c448c | 00001800 | c28000c3 |
| 0030041c | 40800000 | 40400800 | 58098ab8 | 22800022 | 86510016 |
| 03042002 | 8c000000 | 48100000 | 11400017 | 00000504 | c0079002 |
| 20048200 | 20410620 |          |          |          |          |

&gt;D03798

|          |          |          |          |          |          |
|----------|----------|----------|----------|----------|----------|
| 00000000 | 00202008 | 20080100 | 00010200 | 00040213 | 00400120 |
| 02000000 | 41000228 | 02084000 | c0080840 | 08000020 | 40408000 |
| 40008402 | 00200080 | 00002080 | 10002008 | 00000020 | 02000042 |
| 00000000 | 20020000 | 00000000 | 0a200008 | 00020028 | 00580010 |
| 08000012 | a0004000 | 00400090 | 4a900000 | 02002080 | 01020802 |
| 02000000 | 00000400 |          |          |          |          |

&gt;D03788

|          |          |          |          |          |          |
|----------|----------|----------|----------|----------|----------|
| 0480801a | 00884808 | 2100090a | 00b10600 | 00001080 | 02110002 |
| 02000000 | 02001000 | 00000000 | 00100840 | 00202004 | 6000b000 |
| 02848c02 | 80000001 | 812b0441 | 000a2008 | 10022000 | 02000002 |
| 00400800 | 00026000 | c0000000 | 08028e00 | 33040040 | 0840001c |
| 00200080 | c0000000 | 00800000 | 8000008c | 00000700 | 20060001 |
| a0044000 | 50010260 |          |          |          |          |

&gt;D03787

|          |          |          |          |          |          |
|----------|----------|----------|----------|----------|----------|
| 00040012 | 21000200 | 10100102 | 02010610 | 00080260 | 00020010 |
| 02004000 | 00001001 | 00100900 | 000928c0 | 48118008 | f0818800 |
| 00001000 | 00b01000 | 00020080 | 020c0004 | 21000200 | 02000180 |
| 82402020 | 40900001 | 80000106 | 18010010 | 21004000 | 81500010 |
| 00040000 | c0000401 | 80000000 | 10000001 | 04300006 | 0047c00a |
| 40080104 | 80030608 |          |          |          |          |

&gt;D03784

|          |          |          |          |          |          |
|----------|----------|----------|----------|----------|----------|
| 00008002 | 0c80ca00 | 00000100 | 40050600 | 000c0040 | 00004000 |
| 04000000 | 01001000 | 00000100 | 000808c4 | 0900800c | 40008800 |
| 02001804 | 00400000 | 800000c0 | 000c0004 | 00000008 | 82000004 |
| 00600000 | 00000000 | c0000000 | 18008120 | 21800040 | 81400010 |
| 00006000 | a0000000 | 00000040 | 40000000 | 04400080 | 0046000a |
| 400c4000 | 000204a0 |          |          |          |          |

&gt;D03781

|          |          |          |          |          |          |
|----------|----------|----------|----------|----------|----------|
| 00008002 | 0c80ca00 | 00000100 | 40050600 | 000c0040 | 00004000 |
| 04000000 | 01001400 | 01000100 | 000808c4 | 0900800c | 40008800 |
| 02009804 | 00400000 | 800000c0 | 000c000c | 00000008 | 82000004 |
| 00610010 | 00000000 | c0000000 | 18008b20 | 21800040 | 81400010 |
| 00007000 | a0001000 | 00400040 | 40000000 | 04400080 | 0046000a |
| 440c4000 | 000204a0 |          |          |          |          |

&gt;D03778

|          |          |          |          |          |          |
|----------|----------|----------|----------|----------|----------|
| 00000002 | 01800200 | 00101102 | 00810610 | 04080160 | 00000000 |
| 01002000 | 00001000 | 80500900 | 108818c0 | 28108008 | 50818800 |
| 80001800 | 00b00800 | 00030080 | 000c0004 | 00408000 | 06000000 |
| 00c82008 | 40010201 | 80100500 | 18008010 | 21000440 | 81400414 |
| 00040000 | c0000208 | 00000000 | 10000080 | 84000006 | 0046040a |
| 400c0004 | 20020400 |          |          |          |          |

&gt;D03776

|          |          |          |          |          |          |
|----------|----------|----------|----------|----------|----------|
| 00010000 | 01805200 | 20120000 | 08100e40 | 00080080 | 82002010 |
| 80000000 | 20002000 | 84200200 | 020a48c2 | 00600000 | 600bb000 |
| 06019012 | 01040100 | 82080000 | 00180008 | 14001000 | 00000000 |
| 00404000 | 00420301 | c0000000 | 18050e00 | 03800300 | 04100019 |
| 00002000 | 00000000 | 40004000 | 10000000 | 00000010 | 00060021 |
| b0084000 | 03012220 |          |          |          |          |

&gt;D03775

|          |          |          |          |          |          |
|----------|----------|----------|----------|----------|----------|
| 00010000 | c1005200 | 20100102 | 0c110640 | 000800c0 | 02002010 |
| 80000000 | 20000000 | 84080800 | 020e48c0 | 08302000 | 400db000 |

|          |          |          |          |          |          |
|----------|----------|----------|----------|----------|----------|
| 06418016 | 11242103 | 80180000 | 400c0008 | 14001000 | 02000000 |
| 00400000 | 00006301 | 40000100 | 38040e00 | 03000301 | 06504018 |
| 00000000 | 80000000 | 00004000 | 10000000 | 08000000 | 0006002b |
| 20004004 | 03412600 |          |          |          |          |
